# Supplementary material
Source: publisher site journal article supplement (https://www.spandidos-publications.com/4457/downloadSupplementary)
Supplement: Supplementary file 1 [file downloadSupplementary]

## Sheet: 713 shortlisted variants
Table SI. PolyPhen predicted variants shortlisted after filtration.
Chr	Start	End	Ref	Alt	Func.refGene	Gene.refGene	GeneDetail.refGene	ExonicFunc.refGene	AAChange.refGene	Func.knownGene	Gene.knownGene	GeneDetail.knownGene	ExonicFunc.knownGene	AAChange.knownGene	Func.ensGene	Gene.ensGene	GeneDetail.ensGene	ExonicFunc.ensGene	AAChange.ensGene	avsnp150	ALL.sites.2015_08	AFR.sites.2015_08	AMR.sites.2015_08	EUR.sites.2015_08	SAS.sites.2015_08	EAS.sites.2015_08	esp6500siv2_all	esp6500siv2_aa	esp6500siv2_ea	cosmic70	CLNALLELEID	CLNDN	CLNDISDB	CLNREVSTAT	CLNSIG	SIFT_pred	FATHMM_pred	ExAC_ALL	ExAC_ALL	ExAC_AFR	ExAC_AMR	ExAC_EAS	ExAC_FIN	ExAC_NFE	ExAC_OTH	ExAC_SAS	SIFT_score	SIFT_pred	Polyphen2_HDIV_score
chr1	1043927	1043927	G	A	exonic	AGRN	.	nonsynonymous SNV	AGRN:NM_198576:exon10:c.G1903A:p.D635N,	exonic	AGRN;ENST00000379370.6	.	nonsynonymous SNV	ENST00000379370.6:ENST00000379370.6:exon10:c.G1903A:p.D635N	exonic	AGRN	.	nonsynonymous SNV	AGRN:ENST00000620552.4:exon10:c.G1489A:p.D497N,	rs773493980	.	.	.	.	.	.	.	.	.	.	.	.	.	.	.	T	T	9.443e-06	9.443e-06	0	0	0	0	1.723e-05	0	0	0.28	T	0.929
chr1	1072019	1072019	C	T	exonic	RNF223	.	nonsynonymous SNV	RNF223:NM_001205252:exon2:c.G548A:p.R183H,	exonic	ENST00000453464.2	.	nonsynonymous SNV	ENST00000453464.2:ENST00000453464.2:exon2:c.G548A:p.R183H,	exonic	RNF223	.	unknown	UNKNOWN,	rs752706793	.	.	.	.	.	.	.	.	.	.	.	.	.	.	.	T	D	0.0001	0.0001	0	0	0	.	0	0	0.0001	0.55	T	.
chr1	1926999	1926999	G	A	exonic	CFAP74	.	nonsynonymous SNV	CFAP74:NM_001304360:exon29:c.C3557T:p.T1186I,	exonic	CFAP74	.	nonsynonymous SNV	CFAP74:ENST00000493964.5:exon29:c.C3557T:p.T1186I,	exonic	CFAP74	.	nonsynonymous SNV	CFAP74:ENST00000493964.5:exon29:c.C3557T:p.T1186I,	rs771181764	.	.	.	.	.	.	.	.	.	.	.	.	.	.	.	.	.	0.0001	0.0001	0	0	0	0	0.0002	0	0.0001	0.29	T	.
chr1	5947199	5947199	G	A	exonic	NPHP4	.	nonsynonymous SNV	NPHP4:NM_015102:exon9:c.C1024T:p.R342C,	exonic	ENST00000378156.8;NPHP4	.	nonsynonymous SNV	ENST00000378156.8:ENST00000378156.8:exon9:c.C1024T:p.R342C	exonic	NPHP4	.	nonsynonymous SNV	NPHP4:ENST00000622020.4:exon9:c.C1024T:p.R342C,	rs190940697	0.00199681	.	.	0.004	0.0061	.	0.0007	.	0.0011	.	265418	not_specified|not_provided	MedGen:CN169374|MedGen:CN517202	criteria_provided,_multiple_submitters,_no_conflicts	Benign/Likely_benign	D	D	0.0014	0.0014	0.0002	0.0008	0	0	0.0010	0.0011	0.0052	0.01	D	0.998
chr1	6051658	6051658	G	A	exonic	KCNAB2	.	nonsynonymous SNV	KCNAB2:NM_001199862:exon2:c.G122A:p.R41Q,	exonic	KCNAB2	.	nonsynonymous SNV	KCNAB2:ENST00000378083.7:exon2:c.G122A:p.R41Q,	exonic	KCNAB2	.	nonsynonymous SNV	KCNAB2:ENST00000378083.7:exon2:c.G122A:p.R41Q,	rs530635823	0.000599042	.	.	0.001	0.002	.	.	.	.	.	.	.	.	.	.	D	T	0.0028	0.0028	0	0.0083	0	.	0.0020	0	0.0032	0.1	T	0.837
chr1	6473042	6473042	C	T	exonic	PLEKHG5	.	nonsynonymous SNV	PLEKHG5:NM_001042664:exon9:c.G928A:p.D310N	exonic	PLEKHG5	.	nonsynonymous SNV	PLEKHG5:ENST00000340850.9:exon9:c.G928A:p.D310N	exonic	PLEKHG5	.	nonsynonymous SNV	PLEKHG5:ENST00000340850.9:exon9:c.G928A:p.D310N	rs61730399	0.000599042	.	.	0.003	.	.	0.0025	0.0009	0.0033	.	281708	Distal_spinal_muscular_atrophy|not_specified|not_provided	MedGen:C0393541,Orphanet:ORPHA53739,SNOMED_CT:230247001|MedGen:CN169374|MedGen:CN517202	criteria_provided,_conflicting_interpretations	Conflicting_interpretations_of_pathogenicity	D	T	0.0026	0.0026	0.0006	0.0012	0	0.0021	0.0042	0.0011	0.0003	0.03	D	0.73
chr1	9602074	9602074	G	A	exonic	TMEM201	.	nonsynonymous SNV	TMEM201:NM_001010866:exon6:c.G962A:p.R321Q	exonic	ENST00000340381.10;TMEM201	.	nonsynonymous SNV	TMEM201:ENST00000340305.9:exon6:c.G962A:p.R321Q	exonic	TMEM201	.	nonsynonymous SNV	TMEM201:ENST00000340305.9:exon6:c.G962A:p.R321Q,	rs200511730	0.000199681	.	.	.	.	0.001	.	.	.	.	.	.	.	.	.	D	.	2.583e-05	2.583e-05	0.0001	0	0	0	3.143e-05	0	0	0.02	D	1.0
chr1	10469269	10469269	A	G	exonic	DFFA	.	nonsynonymous SNV	DFFA:NM_004401:exon2:c.T206C:p.I69T	exonic	DFFA;ENST00000377038.7	.	nonsynonymous SNV	DFFA:ENST00000377036.2:exon2:c.T206C:p.I69T	exonic	DFFA	.	nonsynonymous SNV	DFFA:ENST00000377036.2:exon2:c.T206C:p.I69T,	rs138842024	0.00219649	.	0.0043	0.006	0.002	.	0.0033	0.0011	0.0044	.	.	.	.	.	.	T	.	0.0034	0.0034	0.0005	0.0025	0	0.0008	0.0047	0.0077	0.0031	0.19	T	1.0
chr1	10948787	10948787	C	G	exonic	C1orf127	.	nonsynonymous SNV	C1orf127:NM_001366227:exon10:c.G931C:p.A311P	exonic	C1orf127	.	nonsynonymous SNV	C1orf127:ENST00000377004.8:exon12:c.G1348C:p.A450P,	exonic	C1orf127	.	nonsynonymous SNV	C1orf127:ENST00000377004.8:exon12:c.G1348C:p.A450P,	rs117528334	0.00878594	.	.	.	0.001	0.0427	.	.	.	.	.	.	.	.	.	D	T	0.0018	0.0018	0.0001	8.721e-05	0.0227	0	0	0.0026	0.0004	0.28	T	0.987
chr1	11240522	11240522	C	T	exonic	MTOR	.	nonsynonymous SNV	MTOR:NM_004958:exon11:c.G1567A:p.D523N,	exonic	ENST00000361445.8	.	nonsynonymous SNV	ENST00000361445.8:ENST00000361445.8:exon11:c.G1567A:p.D523N,	exonic	MTOR	.	nonsynonymous SNV	MTOR:ENST00000361445.8:exon11:c.G1567A:p.D523N,	rs376836258	.	.	.	.	.	.	7.7e-05	0.0002	.	.	.	.	.	.	.	D	T	1.652e-05	1.652e-05	9.61e-05	8.639e-05	0	0	0	0	0	0.01	D	0.961
chr1	11706436	11706436	C	T	exonic	DRAXIN	.	nonsynonymous SNV	DRAXIN:NM_198545:exon2:c.C178T:p.R60W,	exonic	ENST00000294485.5	.	nonsynonymous SNV	ENST00000294485.5:ENST00000294485.5:exon2:c.C178T:p.R60W,	exonic	DRAXIN	.	unknown	UNKNOWN,	rs202026446	0.00139776	0.0008	0.0014	0.003	0.002	.	0.0034	0.0014	0.0045	ID=COSM3417929;OCCURENCE=1(large_intestine)	.	.	.	.	.	D	T	0.0041	0.0041	0.0010	0.0017	0	0.0011	0.0058	0.0077	0.0040	0.01	D	1.0
chr1	13778644	13778645	TG	-	exonic	PRDM2	.	frameshift deletion	PRDM2:NM_001007257:exon3:c.246_247del:p.D82Efs*2	exonic	PRDM2	.	frameshift deletion	PRDM2:ENST00000413440.5:exon3:c.246_247del:p.D82Efs*2	exonic	PRDM2	.	frameshift deletion	PRDM2:ENST00000413440.5:exon3:c.246_247del:p.D82Efs*2	rs776947041	.	.	.	.	.	.	.	.	.	ID=COSM1166773;OCCURENCE=1(haematopoietic_and_lymphoid_tissue)	.	.	.	.	.	.	.	0.0042	0.0042	0.0012	0.0037	0	0.0019	0.0041	0.0117	0.0100	.	.	.
chr1	13778647	13778647	T	-	exonic	PRDM2	.	frameshift deletion	PRDM2:NM_001007257:exon3:c.249delT:p.D83Efs*22	exonic	PRDM2	.	frameshift deletion	PRDM2:ENST00000413440.5:exon3:c.249delT:p.D83Efs*22	exonic	PRDM2	.	frameshift deletion	PRDM2:ENST00000413440.5:exon3:c.249delT:p.D83Efs*22	rs770299670	.	.	.	.	.	.	.	.	.	.	.	.	.	.	.	.	.	0.0024	0.0024	0.0009	0.0012	0	0.0014	0.0026	0.0078	0.0049	.	.	.
chr1	15929670	15929670	A	C	exonic	SPEN	.	nonsynonymous SNV	SPEN:NM_015001:exon11:c.A3430C:p.K1144Q,	exonic	ENST00000375759.7	.	nonsynonymous SNV	ENST00000375759.7:ENST00000375759.7:exon11:c.A3430C:p.K1144Q,	exonic	SPEN	.	unknown	UNKNOWN,	rs753563571	.	.	.	.	.	.	.	.	.	.	.	.	.	.	.	D	T	8.332e-06	8.332e-06	0	0	0.0001	0	0	0	0	0.49	T	0.779
chr1	20314433	20314433	T	C	exonic	VWA5B1	.	nonsynonymous SNV	VWA5B1:NM_001039500:exon4:c.T404C:p.I135T,	exonic	VWA5B1	.	nonsynonymous SNV	VWA5B1:ENST00000289815.12:exon4:c.T404C:p.I135T	exonic	VWA5B1	.	nonsynonymous SNV	VWA5B1:ENST00000289815.12:exon4:c.T404C:p.I135T	rs146970556	0.00199681	.	0.0043	0.006	0.001	.	0.0015	.	0.0022	.	.	.	.	.	.	D	T	0.0014	0.0014	0	0.0048	0	0	0.0026	0	0.0006	0	D	0.999
chr1	21855672	21855672	C	T	exonic	HSPG2	.	nonsynonymous SNV	HSPG2:NM_001291860:exon46:c.G5708A:p.G1903D	exonic	ENST00000374695.7	.	nonsynonymous SNV	ENST00000374695.7:ENST00000374695.7:exon46:c.G5705A:p.G1902D,	exonic	HSPG2	.	unknown	UNKNOWN,	rs553885469	0.000199681	.	.	0.001	.	.	.	.	.	.	.	.	.	.	.	T	T	0.0009	0.0009	0	0	0	0.0091	0.0013	0.0034	0	0.27	T	1.0
chr1	23433118	23433118	G	A	exonic	ASAP3	.	nonsynonymous SNV	ASAP3:NM_001143778:exon21:c.C2255T:p.S752F	exonic	ASAP3;ENST00000336689.7	.	nonsynonymous SNV	ASAP3:ENST00000495646.5:exon7:c.C794T:p.S265F	exonic	ASAP3	.	nonsynonymous SNV	ASAP3:ENST00000495646.5:exon7:c.C794T:p.S265F	rs200686258	.	.	.	.	.	.	7.7e-05	.	0.0001	.	.	.	.	.	.	D	T	0.0001	0.0001	0	0	0	0	4.499e-05	0	0.0006	0.02	D	0.925
chr1	24663197	24663197	A	G	exonic	SRRM1	.	nonsynonymous SNV	SRRM1:NM_001366568:exon12:c.A1394G:p.K465R	exonic	SRRM1	.	nonsynonymous SNV	SRRM1:ENST00000374389.8:exon13:c.A1628G:p.K543R	exonic	SRRM1	.	nonsynonymous SNV	SRRM1:ENST00000374389.8:exon13:c.A1628G:p.K543R,	rs202171183	0.000399361	.	.	0.001	0.001	.	.	.	.	.	.	.	.	.	.	D	T	0.0012	0.0012	0	0	0	0	0.0021	0.0049	0.0009	0.6	T	0.974
chr1	26339382	26339382	C	G	exonic	CRYBG2	.	nonsynonymous SNV	CRYBG2:NM_001039775:exon6:c.G3252C:p.K1084N,	exonic	CRYBG2	.	nonsynonymous SNV	CRYBG2:ENST00000308182.9:exon6:c.G3252C:p.K1084N	exonic	AIM1L	.	nonsynonymous SNV	AIM1L:ENST00000308182.9:exon6:c.G3252C:p.K1084N,	rs142035096	0.0071885	0.0015	0.0101	0.0159	0.0112	.	0.0087	0.0041	0.0110	.	.	.	.	.	.	.	.	0.0125	0.0125	0.0031	0.0049	0	0.0383	0.0135	0.0110	0.0160	0.39	T	0.837
chr1	34794607	34794607	C	T	exonic	GJA4	.	nonsynonymous SNV	GJA4:NM_002060:exon2:c.C394T:p.R132C,	exonic	ENST00000342280.4;GJA4	.	nonsynonymous SNV	ENST00000342280.4:ENST00000342280.4:exon2:c.C394T:p.R132C	exonic	GJA4	.	unknown	UNKNOWN,	rs61777220	0.00419329	.	0.0043	0.005	0.0133	.	0.0068	0.0014	0.0097	.	707363	not_provided	MedGen:CN517202	criteria_provided,_single_submitter	Benign	D	D	0.0095	0.0095	0.0017	0.0062	0	0.0081	0.0116	0.0146	0.0134	0.02	D	0.946
chr1	36358837	36358843	GCTGCTG	-	exonic	STK40	.	frameshift deletion	STK40:NM_001282546:exon3:c.113delC:p.A38Vfs*5,	exonic	STK40	.	frameshift deletion	STK40:ENST00000373130.7:exon3:c.113delC:p.A38Vfs*5,	exonic	STK40	.	frameshift deletion	STK40:ENST00000373130.7:exon3:c.113delC:p.A38Vfs*5,	rs753590226	.	.	.	.	.	.	.	.	.	.	.	.	.	.	.	.	.	8.269e-06	8.269e-06	0	0	0.0001	0	0	0	0	.	.	.
chr1	40202583	40202583	C	G	exonic	RLF	.	nonsynonymous SNV	RLF:NM_012421:exon5:c.C779G:p.S260C,	exonic	ENST00000372771.4	.	nonsynonymous SNV	ENST00000372771.4:ENST00000372771.4:exon5:c.C779G:p.S260C,	exonic	RLF	.	unknown	UNKNOWN,	rs61781760	0.00798722	0.0015	0.0159	.	0.002	0.0248	0.0008	0.0005	0.0009	ID=COSM146478;OCCURENCE=1(stomach)	696737	not_provided	MedGen:CN517202	criteria_provided,_single_submitter	Benign	D	T	0.0078	0.0078	0.0007	0.0533	0.0273	0.0005	0.0009	0.0033	0.0008	0	D	0.997
chr1	41381805	41381805	A	C	exonic	FOXO6	.	nonsynonymous SNV	FOXO6:NM_001291281:exon2:c.A604C:p.K202Q,	exonic	FOXO6	.	nonsynonymous SNV	FOXO6:ENST00000641094.1:exon2:c.A604C:p.K202Q,	exonic	FOXO6	.	unknown	UNKNOWN,	rs555382137	0.00159744	0.0008	0.0014	0.004	0.001	0.001	.	.	.	.	.	.	.	.	.	.	.	0.0018	0.0018	0.0013	0.0042	0	0	0.0042	0	0.0004	0.07	T	.
chr1	42775327	42775327	C	T	exonic	C1orf50	.	nonsynonymous SNV	C1orf50:NM_024097:exon5:c.C533T:p.T178M,	exonic	ENST00000372525.6	.	nonsynonymous SNV	ENST00000372525.6:ENST00000372525.6:exon5:c.C533T:p.T178M,	exonic	C1orf50	.	unknown	UNKNOWN,	rs11548275	0.00519169	0.0023	0.0086	0.0149	0.002	.	0.0164	0.0061	0.0216	.	.	.	.	.	.	D	T	0.0120	0.012	0.0039	0.0087	0	0.0085	0.0177	0.0134	0.0043	0.03	D	0.971
chr1	43164644	43164644	T	A	exonic	EBNA1BP2	.	nonsynonymous SNV	EBNA1BP2:NM_006824:exon8:c.A869T:p.N290I	exonic	EBNA1BP2	.	nonsynonymous SNV	EBNA1BP2:ENST00000236051.2:exon8:c.A869T:p.N290I	exonic	EBNA1BP2	.	nonsynonymous SNV	EBNA1BP2:ENST00000236051.2:exon8:c.A869T:p.N290I	rs11559312	0.00239617	.	.	0.008	0.0041	.	0.0072	0.0030	0.0094	.	707415	not_provided	MedGen:CN517202	criteria_provided,_single_submitter	Benign	D	T	0.0060	0.006	0.0022	0.0022	0	0.0026	0.0086	0.0077	0.0045	0.01	D	0.997
chr1	43222879	43222879	T	C	exonic	CFAP57	.	nonsynonymous SNV	CFAP57:NM_001195831:exon16:c.T2588C:p.I863T,	exonic	CFAP57	.	nonsynonymous SNV	CFAP57:ENST00000372492.8:exon16:c.T2588C:p.I863T	exonic	CFAP57	.	nonsynonymous SNV	CFAP57:ENST00000372492.8:exon16:c.T2588C:p.I863T	rs150404479	0.00439297	.	0.0101	0.0129	0.002	.	.	.	.	.	.	.	.	.	.	D	T	0.0070	0.007	0.0038	0.0041	0	0.0037	0.0155	0	0.0030	0.42	T	.
chr1	46185497	46185497	G	A	exonic	TSPAN1	.	nonsynonymous SNV	TSPAN1:NM_005727:exon9:c.G690A:p.M230I,	exonic	ENST00000372003.5	.	nonsynonymous SNV	ENST00000372003.5:ENST00000372003.5:exon9:c.G690A:p.M230I,	exonic	TSPAN1	.	unknown	UNKNOWN,	rs34463133	0.00139776	.	0.0014	0.002	0.0041	.	0.0028	0.0016	0.0035	.	.	.	.	.	.	T	T	0.0030	0.003	0.0005	0.0022	0	0.0032	0.0039	0.0033	0.0030	0.69	T	0.957
chr1	51112565	51112565	C	T	exonic	C1orf185	.	stopgain	C1orf185:NM_001136508:exon2:c.C118T:p.R40X,	exonic	C1orf185;ENST00000371759.6	.	stopgain	C1orf185:ENST00000612209.1:exon1:c.C106T:p.R36X	exonic	C1orf185	.	stopgain	C1orf185:ENST00000612209.1:exon1:c.C106T:p.R36X	rs200512447	0.000199681	.	.	0.001	.	.	0.0002	.	0.0003	.	.	.	.	.	.	.	.	0.0003	0.0003	0	0	0	0.0018	0.0005	0	0	1	T	.
chr1	51394387	51394387	C	T	exonic	EPS15	.	nonsynonymous SNV	EPS15:NM_001159969:exon9:c.G1171A:p.D391N	exonic	ENST00000371733.7;EPS15	.	nonsynonymous SNV	EPS15:ENST00000371730.6:exon19:c.G1711A:p.D571N	exonic	EPS15	.	nonsynonymous SNV	EPS15:ENST00000371730.6:exon19:c.G1711A:p.D571N,	rs183838419	0.00279553	.	.	.	0.001	0.0129	.	.	.	.	.	.	.	.	.	D	T	0.0014	0.0014	0.0001	0	0.0164	0	6.377e-05	0.0023	0.0013	0.46	T	1.0
chr1	53866265	53866265	G	A	exonic	YIPF1	.	nonsynonymous SNV	YIPF1:NM_018982:exon9:c.C766T:p.R256C,	exonic	ENST00000072644.6;YIPF1	.	nonsynonymous SNV	YIPF1:ENST00000371399.5:exon7:c.C217T:p.R73C	exonic	YIPF1	.	nonsynonymous SNV	YIPF1:ENST00000371399.5:exon7:c.C217T:p.R73C,	rs780910345	.	.	.	.	.	.	.	.	.	.	.	.	.	.	.	T	.	3.298e-05	3.298e-05	9.639e-05	0	0	0	1.5e-05	0	0.0001	0.02	D	1.0
chr1	54599297	54599297	C	T	exonic	ACOT11	.	nonsynonymous SNV	ACOT11:NM_015547:exon8:c.C766T:p.R256W	exonic	ACOT11	.	nonsynonymous SNV	ACOT11:ENST00000343744.6:exon8:c.C766T:p.R256W	exonic	ACOT11	.	nonsynonymous SNV	ACOT11:ENST00000343744.6:exon8:c.C766T:p.R256W	rs148238018	0.00359425	.	0.0072	0.0109	0.002	.	0.0146	0.0036	0.0202	.	.	.	.	.	.	D	T	0.0133	0.0133	0.0028	0.0031	0	0.0195	0.0200	0.0079	0.0043	0	D	1.0
chr1	54654029	54654029	T	C	exonic	MROH7	.	nonsynonymous SNV	MROH7:NM_001039464:exon3:c.T1103C:p.V368A,	exonic	ENST00000421030.6;MROH7;MROH7-TTC4	.	nonsynonymous SNV	MROH7:ENST00000438846.5:exon1:c.T1103C:p.V368A	exonic	MROH7;MROH7-TTC4	.	nonsynonymous SNV	MROH7:ENST00000339553.9:exon3:c.T1103C:p.V368A	rs189525766	0.00339457	0.003	0.0014	0.0109	0.001	.	0.0124	0.0019	0.0176	.	.	.	.	.	.	D	T	0.0139	0.0139	0.0030	0.0025	0	0.0132	0.0227	0.0123	0.0008	0.01	D	0.597
chr1	56496592	56496592	C	T	exonic	PLPP3	.	nonsynonymous SNV	PLPP3:NM_003713:exon6:c.G895A:p.V299M,	exonic	AC119674.2;ENST00000371250.3	.	nonsynonymous SNV	AC119674.2:ENST00000641109.1:exon3:c.G304A:p.V102M	exonic	PLPP3	.	unknown	UNKNOWN,	rs147388964	0.000399361	.	.	0.002	.	.	.	.	.	.	.	.	.	.	.	D	T	0.0006	0.0006	0	0	0	0.0079	0.0003	0.0044	0	0.1	T	0.883
chr1	62114246	62114246	G	A	exonic	PATJ	.	nonsynonymous SNV	PATJ:NM_001350145:exon35:c.G4655A:p.R1552Q	exonic	PATJ	.	nonsynonymous SNV	PATJ:ENST00000635137.1:exon9:c.G1007A:p.R336Q	exonic	PATJ	.	nonsynonymous SNV	PATJ:ENST00000635137.1:exon9:c.G1007A:p.R336Q	rs144362185	.	.	.	.	.	.	0.0002	.	0.0003	.	.	.	.	.	.	D	T	0.0001	0.0001	0	0	0	0	0.0001	0	0.0004	0	D	1.0
chr1	74472097	74472097	T	C	exonic	LRRC53	.	nonsynonymous SNV	LRRC53:NM_001364665:exon4:c.A1525G:p.I509V	exonic	LRRC53	.	nonsynonymous SNV	LRRC53:ENST00000294635.4:exon5:c.A1525G:p.I509V,	exonic	LRRC53	.	nonsynonymous SNV	LRRC53:ENST00000294635.4:exon5:c.A1525G:p.I509V,	rs61729305	0.00359425	0.0008	0.0072	0.0099	0.002	.	.	.	.	.	.	.	.	.	.	.	T	0.0050	0.005	0.0010	0.0068	0	0.0018	0.0073	0	0.0048	0	D	.
chr1	74472163	74472163	G	T	exonic	LRRC53	.	nonsynonymous SNV	LRRC53:NM_001364665:exon4:c.C1459A:p.P487T	exonic	LRRC53	.	nonsynonymous SNV	LRRC53:ENST00000294635.4:exon5:c.C1459A:p.P487T,	exonic	LRRC53	.	nonsynonymous SNV	LRRC53:ENST00000294635.4:exon5:c.C1459A:p.P487T,	rs61729310	0.00359425	0.0008	0.0072	0.0099	0.002	.	.	.	.	.	.	.	.	.	.	D	T	0.0049	0.0049	0.0011	0.0068	0	0.0018	0.0070	0	0.0048	0.01	D	.
chr1	84563402	84563402	A	G	exonic	CTBS	.	nonsynonymous SNV	CTBS:NM_004388:exon6:c.T812C:p.I271T,	exonic	ENST00000370630.5	.	nonsynonymous SNV	ENST00000370630.5:ENST00000370630.5:exon6:c.T812C:p.I271T,	exonic	CTBS	.	unknown	UNKNOWN,	rs143993403	0.00139776	.	.	0.007	.	.	0.0025	0.0005	0.0036	.	.	.	.	.	.	T	T	0.0042	0.0042	0.0009	0.0012	0	0.0207	0.0045	0.0057	0.0024	0.4	T	0.63
chr1	85190219	85190219	C	T	exonic	SYDE2	.	nonsynonymous SNV	SYDE2:NM_032184:exon2:c.G1279A:p.E427K,	exonic	ENST00000341460.5	.	nonsynonymous SNV	ENST00000341460.5:ENST00000341460.5:exon2:c.G1279A:p.E427K,	exonic	SYDE2	.	unknown	UNKNOWN,	rs200884011	0.000399361	.	0.0014	0.001	.	.	0.0010	.	0.0014	.	719114	not_provided	MedGen:CN517202	criteria_provided,_single_submitter	Likely_benign	D	T	0.0015	0.0015	0.0002	0.0003	0	0.0036	0.0022	0.0045	0	0.01	D	0.951
chr1	85783509	85783509	G	T	exonic	COL24A1	.	nonsynonymous SNV	COL24A1:NM_001349955:exon51:c.C2171A:p.P724H	exonic	ENST00000370571.6	.	nonsynonymous SNV	ENST00000370571.6:ENST00000370571.6:exon51:c.C4271A:p.P1424H,	exonic	COL24A1	.	unknown	UNKNOWN,	rs78555989	0.00119808	.	.	.	.	0.006	8.4e-05	.	0.0001	.	.	.	.	.	.	D	D	0.0006	0.0006	0	0	0.0048	0.0003	0.0003	0.0011	0.0001	0.02	D	1.0
chr1	91698125	91698125	C	G	exonic	TGFBR3	.	nonsynonymous SNV	TGFBR3:NM_001195683:exon15:c.G2290C:p.G764R	exonic	ENST00000212355.8;TGFBR3	.	nonsynonymous SNV	TGFBR3:ENST00000525962.5:exon14:c.G2293C:p.G765R	exonic	TGFBR3	.	nonsynonymous SNV	TGFBR3:ENST00000525962.5:exon14:c.G2293C:p.G765R	rs17882828	0.0115815	.	0.0245	.	0.001	0.0397	0.0019	0.0009	0.0024	.	696908	not_provided	MedGen:CN517202	criteria_provided,_single_submitter	Benign	T	T	0.0066	0.0066	0.0005	0.0252	0.0302	0.0027	0.0025	0.0077	0.0030	0.56	T	0.603
chr1	93589211	93589211	C	T	exonic	BCAR3	.	nonsynonymous SNV	BCAR3:NM_001261410:exon3:c.G422A:p.R141H	exonic	BCAR3;ENST00000260502.10	.	nonsynonymous SNV	BCAR3:ENST00000370247.7:exon3:c.G422A:p.R141H	exonic	BCAR3	.	nonsynonymous SNV	BCAR3:ENST00000370247.7:exon3:c.G422A:p.R141H	rs201705203	0.000199681	.	.	.	.	0.001	7.7e-05	.	0.0001	.	.	.	.	.	.	D	D	0.0004	0.0004	0.0001	8.798e-05	0.0008	0.0034	0.0003	0	6.133e-05	0.18	T	0.978
chr1	100499218	100499218	G	A	exonic	CDC14A	.	nonsynonymous SNV	CDC14A:NM_001319212:exon14:c.G832A:p.G278R	exonic	CDC14A;ENST00000336454.4	.	nonsynonymous SNV	ENST00000336454.4:ENST00000336454.4:exon15:c.G1711A:p.G571R	exonic	CDC14A	.	unknown	UNKNOWN,	rs61752469	0.00119808	.	.	0.006	.	.	0.0019	0.0009	0.0024	.	497922	not_specified	MedGen:CN169374	criteria_provided,_multiple_submitters,_no_conflicts	Benign/Likely_benign	D	T	0.0024	0.0024	0.0002	0.0005	0	0.0172	0.0024	0.0066	0	0.05	D	0.991
chr1	112616842	112616842	T	A	exonic	ST7L	.	nonsynonymous SNV	ST7L:NM_017744:exon2:c.A259T:p.T87S	exonic	ENST00000358039.8;ST7L	.	nonsynonymous SNV	ST7L:ENST00000343210.11:exon2:c.A259T:p.T87S	exonic	ST7L	.	nonsynonymous SNV	ST7L:ENST00000343210.11:exon2:c.A259T:p.T87S	rs114199731	0.00339457	0.0008	0.0072	0.0089	0.002	.	0.0067	0.0016	0.0093	.	706578	not_provided	MedGen:CN517202	criteria_provided,_single_submitter	Benign	D	T	0.0063	0.0063	0.0014	0.0054	0	0.0129	0.0083	0.0110	0.0023	0	D	0.999
chr1	153643344	153643344	G	A	exonic	CHTOP	.	nonsynonymous SNV	CHTOP:NM_001206612:exon5:c.G524A:p.R175H	exonic	CHTOP;ENST00000368694.7	.	nonsynonymous SNV	CHTOP:ENST00000368687.1:exon3:c.G446A:p.R149H	exonic	CHTOP	.	nonsynonymous SNV	CHTOP:ENST00000368687.1:exon3:c.G446A:p.R149H	rs74844193	0.00678914	.	0.0058	0.0149	0.0143	0.001	0.0111	0.0030	0.0153	.	.	.	.	.	.	T	D	0.0145	0.0145	0.0024	0.0048	0.0005	0.0283	0.0192	0.0118	0.0110	0.07	T	0.998
chr1	154348906	154348906	C	T	exonic	ATP8B2	.	nonsynonymous SNV	ATP8B2:NM_001367934:exon27:c.C3418T:p.R1140C	exonic	ENST00000368489.3	.	nonsynonymous SNV	ENST00000368489.3:ENST00000368489.3:exon28:c.C3460T:p.R1154C,	exonic	ATP8B2	.	unknown	UNKNOWN,	rs41308375	0.00339457	.	0.0014	0.004	0.002	0.0099	0.0005	.	0.0008	.	.	.	.	.	.	D	T	0.0039	0.0039	0	0.0005	0.0097	0.0238	0.0030	0.0169	0.0013	0	D	1.0
chr1	156344649	156344649	T	G	exonic	TSACC	.	nonsynonymous SNV	TSACC:NM_001304817:exon3:c.T104G:p.L35R	exonic	TSACC	.	nonsynonymous SNV	TSACC:ENST00000368251.1:exon3:c.T104G:p.L35R	exonic	TSACC	.	nonsynonymous SNV	TSACC:ENST00000368251.1:exon3:c.T104G:p.L35R	rs41265041	0.00579073	.	0.0159	0.0159	0.002	.	0.0158	0.0023	0.0227	.	.	.	.	.	.	D	T	0.0141	0.0141	0.0037	0.0099	0	0.0205	0.0202	0.0209	0.0032	0	D	0.999
chr1	156384556	156384556	-	C	exonic	RHBG	.	frameshift insertion	RHBG:NM_020407:exon9:c.1265dupC:p.D425Rfs*18	exonic	ENST00000537040.5	.	frameshift insertion	ENST00000537040.5:ENST00000537040.5:exon9:c.1265dupC:p.D425Rfs*18,	exonic	RHBG	.	unknown	UNKNOWN,	rs587735548	0.00199681	0.0008	0.0086	0.002	0.001	.	.	.	.	.	.	.	.	.	.	.	.	0.0020	0.002	0.0027	0.0020	0	0	0.0024	0.0081	0.0018	.	.	.
chr1	157696253	157696253	G	A	exonic	FCRL3	.	nonsynonymous SNV	FCRL3:NM_001320333:exon7:c.C919T:p.L307F	exonic	ENST00000368184.7;FCRL3	.	nonsynonymous SNV	FCRL3:ENST00000477837.5:exon6:c.C634T:p.L212F	exonic	FCRL3	.	nonsynonymous SNV	FCRL3:ENST00000368186.9:exon7:c.C919T:p.L307F,	rs12041673	0.00399361	.	.	.	0.0123	0.0079	0.0002	0.0005	.	.	731787	not_provided	MedGen:CN517202	criteria_provided,_single_submitter	Benign	D	D	0.0021	0.0021	0.0004	0.0003	0.0122	0	2.997e-05	0.0022	0.0082	0	D	0.999
chr1	157698629	157698629	C	A	exonic	FCRL3	.	nonsynonymous SNV	FCRL3:NM_001320333:exon4:c.G53T:p.G18V	exonic	ENST00000368184.7;FCRL3	.	nonsynonymous SNV	ENST00000368184.7:ENST00000368184.7:exon4:c.G53T:p.G18V	exonic	FCRL3	.	nonsynonymous SNV	FCRL3:ENST00000368186.9:exon4:c.G53T:p.G18V,	rs137945167	0.000199681	.	.	0.001	.	.	0.0002	.	0.0003	.	.	.	.	.	.	T	T	0.0004	0.0004	0	8.685e-05	0	0	0.0005	0.0022	0.0012	0.14	T	0.935
chr1	158094349	158094349	C	T	exonic	KIRREL1	.	nonsynonymous SNV	KIRREL1:NM_001286349:exon12:c.C1456T:p.R486C	exonic	ENST00000359209.10;KIRREL1	.	nonsynonymous SNV	KIRREL1:ENST00000368172.1:exon10:c.C1198T:p.R400C	exonic	KIRREL	.	nonsynonymous SNV	KIRREL:ENST00000368172.1:exon10:c.C1198T:p.R400C	rs143303568	0.000199681	.	0.0014	.	.	.	.	.	.	.	.	.	.	.	.	D	T	4.359e-05	4.359e-05	0	0.0001	0	0	5.598e-05	0	0	0.05	D	0.999
chr1	168050931	168050931	G	A	exonic	DCAF6	.	nonsynonymous SNV	DCAF6:NM_001198957:exon16:c.G2205A:p.M735I	exonic	DCAF6	.	nonsynonymous SNV	DCAF6:ENST00000432587.6:exon16:c.G2205A:p.M735I	exonic	DCAF6	.	nonsynonymous SNV	DCAF6:ENST00000432587.6:exon16:c.G2205A:p.M735I	rs754283834	.	.	.	.	.	.	.	.	.	.	.	.	.	.	.	T	T	0.0005	0.0005	0	0	0	0.0027	0.0002	0	0	0.42	T	0.512
chr1	171341636	171341636	A	G	exonic	FMO4	.	nonsynonymous SNV	FMO4:NM_002022:exon10:c.A1474G:p.R492G,	exonic	ENST00000367749.3	.	nonsynonymous SNV	ENST00000367749.3:ENST00000367749.3:exon10:c.A1474G:p.R492G,	exonic	FMO4	.	unknown	UNKNOWN,	rs143713856	.	.	.	.	.	.	0.0002	0.0002	0.0002	.	.	.	.	.	.	D	T	0.0002	0.0002	0.0002	0	0	0.0011	0.0002	0	0	0.04	D	0.995
chr1	182586518	182586518	T	G	exonic	RNASEL	.	nonsynonymous SNV	RNASEL:NM_021133:exon2:c.A289C:p.I97L,	exonic	RNASEL	.	nonsynonymous SNV	RNASEL:ENST00000367559.7:exon2:c.A289C:p.I97L	exonic	RNASEL	.	nonsynonymous SNV	RNASEL:ENST00000367559.7:exon2:c.A289C:p.I97L	rs56250729	0.00299521	.	.	0.0149	.	.	0.0067	0.0018	0.0092	.	794508	not_provided	MedGen:CN517202	criteria_provided,_single_submitter	Likely_benign	D	T	0.0077	0.0077	0.0018	0.0014	0	0.0056	0.0124	0.0022	0.0024	0.56	T	0.997
chr1	186074775	186074775	C	T	exonic	HMCN1	.	nonsynonymous SNV	HMCN1:NM_031935:exon53:c.C8174T:p.A2725V,	exonic	ENST00000271588.8	.	nonsynonymous SNV	ENST00000271588.8:ENST00000271588.8:exon53:c.C8174T:p.A2725V,	exonic	HMCN1	.	unknown	UNKNOWN,	rs138928800	0.00159744	.	.	0.005	.	0.003	0.0002	.	0.0002	ID=COSM175948;OCCURENCE=3(large_intestine)	.	.	.	.	.	T	T	0.0010	0.001	9.634e-05	0	0.0012	0.0081	0.0007	0.0011	0.0006	0.36	T	0.976
chr1	186088749	186088749	A	G	exonic	HMCN1	.	nonsynonymous SNV	HMCN1:NM_031935:exon63:c.A9721G:p.I3241V,	exonic	ENST00000271588.8	.	nonsynonymous SNV	ENST00000271588.8:ENST00000271588.8:exon63:c.A9721G:p.I3241V,	exonic	HMCN1	.	unknown	UNKNOWN,	rs151211018	0.00159744	.	.	0.005	.	0.003	7.7e-05	.	0.0001	.	.	.	.	.	.	T	T	0.0012	0.0012	0.0001	0	0.0013	0.0090	0.0008	0.0013	0.0006	1	T	0.728
chr1	197427787	197427787	C	T	exonic	CRB1	.	nonsynonymous SNV	CRB1:NM_001193640:exon5:c.C2126T:p.T709M	exonic	CRB1;ENST00000367400.7	.	nonsynonymous SNV	CRB1:ENST00000367397.1:exon3:c.C605T:p.T202M	exonic	CRB1	.	nonsynonymous SNV	CRB1:ENST00000367397.1:exon3:c.C605T:p.T202M	rs142857810	.	.	.	.	.	.	0.0002	.	0.0002	.	195794	not_provided	MedGen:CN517202	criteria_provided,_conflicting_interpretations	Conflicting_interpretations_of_pathogenicity	T	T	0.0002	0.0002	0	0.0005	0	0	0.0003	0	0.0001	0.11	T	1.0
chr1	201076930	201076930	C	T	exonic	CACNA1S	.	nonsynonymous SNV	CACNA1S:NM_000069:exon12:c.G1817A:p.S606N,	exonic	CACNA1S;ENST00000362061.3	.	nonsynonymous SNV	ENST00000362061.3:ENST00000362061.3:exon12:c.G1817A:p.S606N	exonic	CACNA1S	.	nonsynonymous SNV	CACNA1S:ENST00000367338.7:exon12:c.G1817A:p.S606N,	rs142356235	0.00479233	0.0008	0.0043	0.0139	0.0051	0.001	0.0087	0.0032	0.0115	.	249635	Malignant_hyperthermia_susceptibility|Hypokalemic_periodic_paralysis|not_specified|not_provided	MedGen:C0024591,Orphanet:ORPHA423|MedGen:C0238358,Orphanet:ORPHA681|MedGen:CN169374|MedGen:CN517202	criteria_provided,_multiple_submitters,_no_conflicts	Benign/Likely_benign	D	D	0.0088	0.0088	0.0016	0.0035	0	0.0153	0.0124	0.0165	0.0040	0	D	0.929
chr1	201114758	201114758	C	G	exonic	ASCL5	.	nonsynonymous SNV	ASCL5:NM_001270601:exon1:c.G615C:p.W205C,	exonic	ASCL5	.	nonsynonymous SNV	ASCL5:ENST00000458416.2:exon1:c.G615C:p.W205C	exonic	ASCL5	.	nonsynonymous SNV	ASCL5:ENST00000458416.2:exon1:c.G615C:p.W205C	rs57062668	0.0960463	0.062	0.1225	0.1282	0.0675	0.1181	.	.	.	.	.	.	.	.	.	.	D	0	0	0	.	.	.	.	.	.	.	.	.
chr1	203770929	203770929	G	A	exonic	LAX1	.	nonsynonymous SNV	LAX1:NM_001136190:exon2:c.G143A:p.R48Q	exonic	ENST00000442561.6;LAX1	.	nonsynonymous SNV	LAX1:ENST00000367217.5:exon2:c.G143A:p.R48Q	exonic	LAX1	.	nonsynonymous SNV	LAX1:ENST00000367217.5:exon2:c.G143A:p.R48Q	rs41264259	0.00738818	0.0008	0.0144	0.0189	0.0072	.	0.0116	0.0023	0.0164	.	.	.	.	.	.	T	.	0.0101	0.0101	0.0024	0.0054	0.0002	0.0053	0.0137	0.0132	0.0107	0.37	T	0.847
chr1	203800317	203800317	G	A	exonic	ZBED6	.	nonsynonymous SNV	ZBED6:NM_001174108:exon1:c.G2795A:p.S932N,	exonic	ZBED6	.	nonsynonymous SNV	ZBED6:ENST00000550078.2:exon1:c.G2795A:p.S932N,	exonic	ZBED6	.	nonsynonymous SNV	ZBED6:ENST00000550078.2:exon1:c.G2795A:p.S932N,	rs527596769	0.00139776	.	.	.	0.0072	.	.	.	.	.	.	.	.	.	.	T	T	0.0048	0.0048	0	0	0	0	0.0003	0.0076	0.0075	0.38	T	.
chr1	207022878	207022878	G	A	exonic	C1orf116	.	nonsynonymous SNV	C1orf116:NM_001083924:exon3:c.C148T:p.P50S	exonic	C1orf116;ENST00000359470.5	.	nonsynonymous SNV	C1orf116:ENST00000461135.2:exon3:c.C148T:p.P50S	exonic	C1orf116	.	nonsynonymous SNV	C1orf116:ENST00000461135.2:exon3:c.C148T:p.P50S,	rs147851020	0.00139776	.	.	0.003	.	0.004	0.0003	0.0005	0.0002	.	.	.	.	.	.	T	T	0.0019	0.0019	0.0016	0.0003	0.0024	0.0181	0.0008	0.0077	0.0002	0.37	T	0.713
chr1	212624909	212624909	C	T	exonic	FAM71A	.	nonsynonymous SNV	FAM71A:NM_153606:exon1:c.C32T:p.T11M,	exonic	ENST00000294829.4	.	nonsynonymous SNV	ENST00000294829.4:ENST00000294829.4:exon1:c.C32T:p.T11M,	exonic	FAM71A	.	nonsynonymous SNV	FAM71A:ENST00000294829.4:exon1:c.C32T:p.T11M,	rs139614117	0.0171725	.	0.0965	0.002	.	0.0169	0.0010	0.0018	0.0006	.	.	.	.	.	.	D	T	0.0149	0.0149	0.0025	0.1227	0.0172	0.0056	0.0013	0.0124	0.0015	0	D	1.0
chr1	220062792	220062792	C	T	exonic	BPNT1	.	nonsynonymous SNV	BPNT1:NM_001286149:exon6:c.G472A:p.D158N	exonic	BPNT1;ENST00000322067.11	.	nonsynonymous SNV	BPNT1:ENST00000414869.6:exon6:c.G529A:p.D177N	exonic	BPNT1	.	nonsynonymous SNV	BPNT1:ENST00000414869.6:exon6:c.G529A:p.D177N	rs147533233	0.000798722	.	.	0.004	.	.	0.0027	0.0003	0.0038	.	.	.	.	.	.	T	D	0.0035	0.0035	0.0002	0.0005	0	0.0119	0.0049	0.0067	0.0001	0.23	T	0.985
chr1	227748053	227748053	C	A	exonic	SNAP47	.	nonsynonymous SNV	SNAP47:NM_001323930:exon2:c.C317A:p.P106H	exonic	SNAP47	.	nonsynonymous SNV	SNAP47:ENST00000315781.9:exon2:c.C452A:p.P151H	exonic	SNAP47	.	nonsynonymous SNV	SNAP47:ENST00000315781.9:exon2:c.C452A:p.P151H	rs200847495	0.000199681	.	.	0.001	.	.	7.7e-05	.	0.0001	.	.	.	.	.	.	D	T	0.0007	0.0007	0	0	0	0.0103	0.0003	0.0022	0	0	D	0.998
chr1	228307472	228307472	C	T	exonic	OBSCN	.	nonsynonymous SNV	OBSCN:NM_001098623:exon46:c.C12407T:p.T4136M	exonic	ENST00000284548.15;OBSCN	.	nonsynonymous SNV	OBSCN:ENST00000636875.1:exon45:c.C12407T:p.T4136M	exonic	OBSCN	.	nonsynonymous SNV	OBSCN:ENST00000636875.1:exon45:c.C12407T:p.T4136M	rs368146263	.	.	.	.	.	.	7.8e-05	.	0.0001	.	.	.	.	.	.	D	T	0.0002	0.0002	0.0007	0	0	0	0.0001	0	9.477e-05	0.04	D	1.0
chr1	229651308	229651308	G	A	exonic	URB2	.	nonsynonymous SNV	URB2:NM_001314021:exon8:c.G4223A:p.R1408Q	exonic	ENST00000258243.6;URB2	.	nonsynonymous SNV	URB2:ENST00000434387.1:exon1:c.G71A:p.R24Q	exonic	URB2	.	unknown	UNKNOWN,	rs41310553	0.0081869	0.0083	0.0159	0.0139	0.0051	.	0.0159	0.0132	0.0173	.	.	.	.	.	.	D	T	0.0138	0.0138	0.0115	0.0109	0	0.0086	0.0190	0.0145	0.0052	.	.	1.0
chr1	231200188	231200188	G	A	exonic	TRIM67	.	nonsynonymous SNV	TRIM67:NM_001004342:exon4:c.G1304A:p.R435H	exonic	TRIM67	.	nonsynonymous SNV	TRIM67:ENST00000366653.5:exon4:c.G1304A:p.R435H	exonic	TRIM67	.	nonsynonymous SNV	TRIM67:ENST00000366653.5:exon4:c.G1304A:p.R435H	rs186591198	0.000599042	.	0.0029	.	0.001	.	0.0012	0.0010	0.0013	.	.	.	.	.	.	D	T	0.0014	0.0014	0.0004	0.0004	0	0.0027	0.0021	0.0045	0.0003	0.01	D	0.999
chr1	232807473	232807473	A	G	exonic	MAP10	.	nonsynonymous SNV	MAP10:NM_019090:exon1:c.A2450G:p.D817G,	exonic	MAP10	.	nonsynonymous SNV	MAP10:ENST00000418460.2:exon1:c.A2450G:p.D817G,	exonic	MAP10	.	nonsynonymous SNV	MAP10:ENST00000418460.2:exon1:c.A2450G:p.D817G,	rs80140823	0.00798722	.	.	.	0.0031	0.0367	8.4e-05	0.0003	.	.	.	.	.	.	.	D	.	0.0029	0.0029	0.0001	8.676e-05	0.0363	0	1.524e-05	0.0011	0.0015	0.33	T	0.992
chr1	236017204	236017204	G	T	exonic	NID1	.	nonsynonymous SNV	NID1:NM_002508:exon10:c.C2198A:p.T733N,	exonic	ENST00000264187.6	.	nonsynonymous SNV	ENST00000264187.6:ENST00000264187.6:exon10:c.C2198A:p.T733N,	exonic	NID1	.	unknown	UNKNOWN,	rs141204959	0.000199681	.	.	.	0.001	.	0.0020	0.0011	0.0024	.	732285	not_provided	MedGen:CN517202	criteria_provided,_single_submitter	Likely_benign	D	D	0.0026	0.0026	0.0004	0.0010	0	0.0048	0.0035	0.0066	0.0019	0.06	T	0.979
chr1	244583875	244583875	C	T	exonic	CATSPERE	.	nonsynonymous SNV	CATSPERE:NM_001242340:exon10:c.C1568T:p.T523M	exonic	CATSPERE;ENST00000366534.8	.	nonsynonymous SNV	CATSPERE:ENST00000428042.1:exon9:c.C1781T:p.T594M	exonic	C1orf101	.	nonsynonymous SNV	C1orf101:ENST00000366531.7:exon10:c.C1568T:p.T523M	rs186385804	0.000199681	.	.	0.001	.	.	.	.	.	.	.	.	.	.	.	T	T	3.309e-05	3.309e-05	0	0	0.0001	0	4.513e-05	0	0	0.01	D	0.909
chr1	246988165	246988165	C	T	exonic	ZNF695	.	nonsynonymous SNV	ZNF695:NM_001204221:exon4:c.G350A:p.C117Y	exonic	ENST00000339986.7;ZNF670-ZNF695;ZNF695	.	nonsynonymous SNV	ENST00000339986.7:ENST00000339986.7:exon4:c.G350A:p.C117Y	exonic	ZNF695	.	nonsynonymous SNV	ZNF695:ENST00000487338.6:exon4:c.G350A:p.C117Y,	rs117437844	0.00239617	.	0.0014	.	.	0.0109	.	.	.	.	.	.	.	.	.	T	T	0.0013	0.0013	0	0.0002	0.0137	0	0.0002	0.0011	0.0013	0.23	T	0.932
chr10	7727729	7727729	C	T	exonic	ITIH2	.	nonsynonymous SNV	ITIH2:NM_002216:exon11:c.C1180T:p.R394W,	exonic	ENST00000358415.8;ITIH2	.	nonsynonymous SNV	ITIH2:ENST00000379587.4:exon10:c.C1147T:p.R383W	exonic	ITIH2	.	nonsynonymous SNV	ITIH2:ENST00000379587.4:exon10:c.C1147T:p.R383W,	rs370458835	0.000199681	.	.	.	0.001	.	7.7e-05	.	0.0001	.	.	.	.	.	.	D	D	8.24e-05	8.24e-05	0	8.639e-05	0	0	4.498e-05	0	0.0004	0.01	D	1.0
chr10	19352037	19352037	G	C	exonic	MALRD1	.	nonsynonymous SNV	MALRD1:NM_001142308:exon26:c.G4181C:p.G1394A,	exonic	ENST00000454679.6;MALRD1	.	nonsynonymous SNV	MALRD1:ENST00000377266.7:exon12:c.G2108C:p.G703A	exonic	MALRD1	.	unknown	UNKNOWN,	rs138930604	.	.	.	.	.	.	.	.	.	.	.	.	.	.	.	T	T	6.086e-05	6.086e-05	0	0	0	0	0	0	0.0001	.	.	.
chr10	26777094	26777094	C	T	exonic	ABI1	.	nonsynonymous SNV	ABI1:NM_001012750:exon3:c.G433A:p.V145I	exonic	ABI1	.	nonsynonymous SNV	ABI1:ENST00000359188.8:exon3:c.G433A:p.V145I	exonic	ABI1	.	nonsynonymous SNV	ABI1:ENST00000359188.8:exon3:c.G433A:p.V145I	rs184667278	0.00139776	.	.	.	0.001	0.006	.	.	.	.	.	.	.	.	.	T	D	0.0005	0.0005	9.612e-05	0	0.0038	0	0	0	0.0013	1	T	0.689
chr10	27211050	27211050	G	T	exonic	ACBD5	.	nonsynonymous SNV	ACBD5:NM_001301254:exon6:c.C437A:p.P146Q	exonic	ACBD5;ENST00000396271.7	.	nonsynonymous SNV	ACBD5:ENST00000375897.7:exon8:c.C962A:p.P321Q	exonic	ACBD5	.	nonsynonymous SNV	ACBD5:ENST00000375897.7:exon8:c.C962A:p.P321Q	rs41314978	0.0265575	.	.	0.003	0.0225	0.1071	0.0015	0.0007	0.0020	.	.	.	.	.	.	D	T	0.0127	0.0127	0.0011	0.0004	0.1166	0.0017	0.0019	0.0154	0.0220	0.11	T	0.883
chr10	27219780	27219780	C	T	exonic	ACBD5	.	nonsynonymous SNV	ACBD5:NM_001301252:exon4:c.G241A:p.E81K	exonic	ACBD5;ENST00000396271.7	.	nonsynonymous SNV	ACBD5:ENST00000375897.7:exon5:c.G562A:p.E188K	exonic	ACBD5	.	nonsynonymous SNV	ACBD5:ENST00000375897.7:exon5:c.G562A:p.E188K	rs187831118	0.00279553	.	.	.	.	0.0139	.	.	.	.	.	.	.	.	.	D	D	0.0006	0.0006	0	0	0.0067	0	0	0	0.0005	0.17	T	1.0
chr10	27403285	27403285	G	T	exonic	PTCHD3	.	nonsynonymous SNV	PTCHD3:NM_001034842:exon3:c.C1284A:p.S428R,	exonic	PTCHD3	.	nonsynonymous SNV	PTCHD3:ENST00000438700.8:exon3:c.C1284A:p.S428R	exonic	PTCHD3	.	nonsynonymous SNV	PTCHD3:ENST00000622555.1:exon3:c.C1284A:p.S428R,	rs769876247	.	.	.	.	.	.	.	.	.	.	.	.	.	.	.	D	D	0.0002	0.0002	0	0.0003	0	0	1.499e-05	0	0.0010	0	D	1.0
chr10	37219233	37219233	A	G	exonic	ANKRD30A	.	nonsynonymous SNV	ANKRD30A:NM_052997:exon34:c.A3353G:p.E1118G,	exonic	ANKRD30A;ENST00000374660.5;ENST00000602533.5	.	nonsynonymous SNV	ANKRD30A:ENST00000361713.1:exon34:c.A3353G:p.E1118G	exonic	ANKRD30A	.	nonsynonymous SNV	ANKRD30A:ENST00000361713.1:exon34:c.A3353G:p.E1118G	rs761085596	.	.	.	.	.	.	.	.	.	.	.	.	.	.	.	D	T	0.0002	0.0002	0.0001	0	0	0	7.536e-05	0	0.0012	0	D	0.949
chr10	43198096	43198096	C	T	exonic	RASGEF1A	.	nonsynonymous SNV	RASGEF1A:NM_001282862:exon10:c.G1156A:p.V386I	exonic	RASGEF1A	.	nonsynonymous SNV	RASGEF1A:ENST00000374459.5:exon10:c.G1156A:p.V386I	exonic	RASGEF1A	.	nonsynonymous SNV	RASGEF1A:ENST00000374459.5:exon10:c.G1156A:p.V386I	rs763163434	.	.	.	.	.	.	.	.	.	.	.	.	.	.	.	T	T	2.474e-05	2.474e-05	0.0002	0	0.0001	0	0	0	0	0.38	T	0.976
chr10	46311604	46311604	G	T	exonic	ANTXRL	.	nonsynonymous SNV	ANTXRL:NM_001278688:exon15:c.G1268T:p.C423F	exonic	ANTXRL	.	nonsynonymous SNV	ANTXRL:ENST00000620264.4:exon15:c.G1268T:p.C423F	exonic	ANTXRL	.	nonsynonymous SNV	ANTXRL:ENST00000620264.4:exon15:c.G1268T:p.C423F	rs542263825	0.00359425	.	.	.	0.0184	.	.	.	.	.	.	.	.	.	.	.	.	0.0069	0.0069	0	0	0	0	0	0	0.0134	.	.	.
chr10	49627642	49627642	G	A	exonic	CHAT	.	nonsynonymous SNV	CHAT:NM_001142929:exon7:c.G614A:p.R205H	exonic	CHAT	.	nonsynonymous SNV	CHAT:ENST00000337653.6:exon7:c.G968A:p.R323H	exonic	CHAT	.	nonsynonymous SNV	CHAT:ENST00000337653.6:exon7:c.G968A:p.R323H	rs200176236	.	.	.	.	.	.	.	.	.	ID=COSM2149376,COSM35809;OCCURENCE=1(oesophagus),3(central_nervous_system),1(prostate),1(large_intestine)	566326	Familial_infantile_myasthenia	MedGen:C0393929,OMIM:254210,SNOMED_CT:230670003	criteria_provided,_single_submitter	Uncertain_significance	D	T	0.0002	0.0002	0	0	0.0002	0	0.0003	0	6.056e-05	0.13	T	1.0
chr10	49648597	49648597	C	T	exonic	CHAT	.	nonsynonymous SNV	CHAT:NM_001142929:exon9:c.C1018T:p.L340F	exonic	CHAT	.	nonsynonymous SNV	CHAT:ENST00000640822.1:exon3:c.C235T:p.L79F	exonic	CHAT	.	nonsynonymous SNV	CHAT:ENST00000640822.1:exon3:c.C235T:p.L79F	rs76014951	0.00139776	.	0.0014	0.006	.	.	0.0031	0.0011	0.0041	.	196317	not_specified|not_provided	MedGen:CN169374|MedGen:CN517202	criteria_provided,_multiple_submitters,_no_conflicts	Benign/Likely_benign	T	D	0.0037	0.0037	0.0009	0.0011	0	0.0154	0.0048	0.0047	6.239e-05	0.08	T	1.0
chr10	49751837	49751837	G	A	exonic	OGDHL	.	nonsynonymous SNV	OGDHL:NM_001143997:exon4:c.C112T:p.R38C	exonic	ENST00000374103.8;OGDHL	.	nonsynonymous SNV	OGDHL:ENST00000432695.2:exon4:c.C112T:p.R38C	exonic	OGDHL	.	nonsynonymous SNV	OGDHL:ENST00000432695.2:exon4:c.C112T:p.R38C	rs780288193	.	.	.	.	.	.	.	.	.	.	.	.	.	.	.	D	D	3.311e-05	3.311e-05	0	0	0.0002	0	3.01e-05	0	0	0.01	D	1.0
chr10	52280910	52280910	C	T	exonic	PRKG1	.	nonsynonymous SNV	PRKG1:NM_001098512:exon13:c.C1480T:p.H494Y	exonic	ENST00000373980.9;ENST00000373985.6;ENST00000401604.7;ENST00000646535.1	.	nonsynonymous SNV	ENST00000373980.9:ENST00000373980.9:exon13:c.C1525T:p.H509Y	exonic	PRKG1	.	unknown	UNKNOWN,	rs139646798	0.00459265	.	0.0058	.	0.001	0.0179	0.0002	0.0005	0.0001	ID=COSM99003;OCCURENCE=1(stomach)	397499	Aortic_aneurysm,_familial_thoracic_8|not_specified|Cardiovascular_phenotype|not_provided	MedGen:C3809513,OMIM:615436|MedGen:CN169374|MedGen:CN230736|MedGen:CN517202	criteria_provided,_multiple_submitters,_no_conflicts	Benign	D	T	0.0018	0.0018	0.0007	0.0054	0.0143	0	0.0002	0.0022	0.0005	0.01	D	0.723
chr10	68886617	68886617	C	T	exonic	STOX1	.	nonsynonymous SNV	STOX1:NM_001130161:exon3:c.C2821T:p.R941W	exonic	ENST00000298596.10;STOX1	.	nonsynonymous SNV	ENST00000298596.10:ENST00000298596.10:exon3:c.C2821T:p.R941W	exonic	STOX1	.	nonsynonymous SNV	STOX1:ENST00000399169.8:exon3:c.C2821T:p.R941W,	rs149455386	0.00519169	.	.	.	0.002	0.0238	0.0002	.	0.0004	.	.	.	.	.	.	D	D	0.0034	0.0034	0	0	0.0374	0.0074	0.0003	0.0022	0.0013	0	D	0.869
chr10	71705007	71705007	A	G	exonic	CDH23	.	nonsynonymous SNV	CDH23:NM_001171930:exon24:c.A2830G:p.S944G	exonic	CDH23;ENST00000224721.11	.	nonsynonymous SNV	CDH23:ENST00000442677.4:exon24:c.A2830G:p.S944G	exonic	CDH23	.	nonsynonymous SNV	CDH23:ENST00000622827.4:exon24:c.A2830G:p.S944G	rs188098974	0.000599042	.	.	0.001	0.002	.	0.0006	.	0.0010	.	55067	not_specified|not_provided	MedGen:CN169374|MedGen:CN517202	criteria_provided,_conflicting_interpretations	Conflicting_interpretations_of_pathogenicity	.	.	0.0014	0.0014	0	0.0002	0	0.0027	0.0013	0.0012	0.0033	0.03	D	0.763
chr10	71813280	71813280	C	T	exonic	CDH23	.	nonsynonymous SNV	CDH23:NM_001171935:exon4:c.C361T:p.R121W	exonic	CDH23;ENST00000224721.11	.	nonsynonymous SNV	CDH23:ENST00000398788.4:exon22:c.C2950T:p.R984W	exonic	CDH23	.	nonsynonymous SNV	CDH23:ENST00000398788.4:exon22:c.C2950T:p.R984W	rs111033457	.	.	.	.	.	.	0.0003	.	0.0005	.	55243	Retinitis_pigmentosa-deafness_syndrome|not_specified|CDH23-Related_Disorders|Nonsyndromic_Hearing_Loss,_Recessive|not_provided	MedGen:CN033130,OMIM:500004,SNOMED_CT:57838006|MedGen:CN169374|MedGen:CN239227|MedGen:CN239439|MedGen:CN517202	criteria_provided,_multiple_submitters,_no_conflicts	Uncertain_significance	D	T	0.0004	0.0004	0.0005	0	0	0	0.0008	0	0	0	D	0.999
chr10	80163601	80163601	G	T	exonic	ANXA11	.	nonsynonymous SNV	ANXA11:NM_001157:exon9:c.C962A:p.T321N	exonic	ANXA11;ENST00000422982.7	.	nonsynonymous SNV	ANXA11:ENST00000265447.8:exon9:c.C863A:p.T288N	exonic	ANXA11	.	nonsynonymous SNV	ANXA11:ENST00000265447.8:exon9:c.C863A:p.T288N	rs76806315	0.000399361	.	.	.	.	0.002	7.7e-05	.	0.0001	.	.	.	.	.	.	T	T	0.0006	0.0006	0	0	0.0075	0.0047	0.0003	0	0.0004	0.21	T	0.883
chr10	80167246	80167246	C	T	exonic	ANXA11	.	nonsynonymous SNV	ANXA11:NM_001157:exon5:c.G629A:p.R210Q	exonic	ANXA11;ENST00000422982.7	.	nonsynonymous SNV	ANXA11:ENST00000265447.8:exon5:c.G530A:p.R177Q	exonic	ANXA11	.	nonsynonymous SNV	ANXA11:ENST00000265447.8:exon5:c.G530A:p.R177Q	rs147610631	0.00139776	0.0015	0.0014	0.002	0.002	.	0.0014	0.0014	0.0014	.	.	.	.	.	.	D	T	0.0011	0.0011	0.0013	0.0030	0	0.0002	0.0011	0.0034	0.0008	0.01	D	0.995
chr10	86679436	86679436	G	A	exonic	LDB3	.	nonsynonymous SNV	LDB3:NM_001080116:exon2:c.G163A:p.V55I	exonic	LDB3	.	nonsynonymous SNV	LDB3:ENST00000263066.10:exon2:c.G163A:p.V55I	exonic	LDB3	.	nonsynonymous SNV	LDB3:ENST00000263066.10:exon2:c.G163A:p.V55I	rs3740343	0.01877	.	0.0072	.	0.0031	0.0853	0.0011	0.0011	0.0010	.	54696	Cardiomyopathy|Left_ventricular_noncompaction_cardiomyopathy|Myofibrillar_myopathy,_ZASP-related|not_specified|Cardiovascular_phenotype|Dilated_Cardiomyopathy,_Dominant|Myofibrillar_Myopathy,_Dominant|not_provided	Human_Phenotype_Ontology:HP:0001638,MedGen:C0878544,Orphanet:ORPHA167848,SNOMED_CT:85898001|Human_Phenotype_Ontology:HP:0011664,MedGen:C4021133|MedGen:C4721886,OMIM:609452|MedGen:CN169374|MedGen:CN230736|MedGen:CN239310|MedGen:CN239446|MedGen:CN517202	criteria_provided,_multiple_submitters,_no_conflicts	Benign/Likely_benign	T	T	0.0072	0.0072	0.0013	0.0068	0.0829	0	0.0005	0.0055	0.0017	0.82	T	0.964
chr10	87745111	87745111	C	T	exonic	PAPSS2	.	nonsynonymous SNV	PAPSS2:NM_004670:exon11:c.C1586T:p.P529L	exonic	ENST00000456849.1;PAPSS2	.	nonsynonymous SNV	PAPSS2:ENST00000361175.8:exon11:c.C1586T:p.P529L	exonic	PAPSS2	.	nonsynonymous SNV	PAPSS2:ENST00000361175.8:exon11:c.C1586T:p.P529L,	rs761090348	.	.	.	.	.	.	.	.	.	.	.	.	.	.	.	D	T	1.649e-05	1.649e-05	0	0	0.0002	0	0	0	0	0.04	D	0.914
chr10	94724388	94724388	G	A	exonic	CYP2C18	.	nonsynonymous SNV	CYP2C18:NM_001128925:exon6:c.G827A:p.R276Q	exonic	AL583836.1;CYP2C18;ENST00000285979.10	.	nonsynonymous SNV	AL583836.1:ENST00000464755.1:exon5:c.G644A:p.R215Q	exonic	CYP2C18;RP11-400G3.5	.	nonsynonymous SNV	RP11-400G3.5:ENST00000464755.1:exon5:c.G644A:p.R215Q	rs41286880	0.00738818	0.0015	0.013	0.0199	0.0051	0.001	0.0157	0.0048	0.0213	.	.	.	.	.	.	T	T	0.0129	0.0129	0.0044	0.0050	0	0.0076	0.0185	0.0121	0.0098	0.04	D	0.988
chr10	95414549	95414549	G	A	exonic	SORBS1	.	nonsynonymous SNV	SORBS1:NM_001290296:exon6:c.C728T:p.P243L	exonic	SORBS1	.	nonsynonymous SNV	SORBS1:ENST00000354106.7:exon6:c.C728T:p.P243L	exonic	SORBS1	.	nonsynonymous SNV	SORBS1:ENST00000354106.7:exon6:c.C728T:p.P243L	rs34507864	0.00678914	0.0045	0.0014	0.0139	0.0133	.	0.0112	0.0050	0.0144	.	.	.	.	.	.	D	T	0.0138	0.0138	0.0056	0.0063	0	0.0096	0.0181	0.0129	0.0182	0.12	T	1.0
chr10	97334326	97334326	C	T	exonic	FRAT2	.	nonsynonymous SNV	FRAT2:NM_012083:exon1:c.G247A:p.A83T,	exonic	ENST00000371019.3	.	nonsynonymous SNV	ENST00000371019.3:ENST00000371019.3:exon1:c.G247A:p.A83T,	exonic	FRAT2	.	nonsynonymous SNV	FRAT2:ENST00000371019.3:exon1:c.G247A:p.A83T,	rs181573119	0.110024	0.0136	0.2017	0.1968	0.1687	0.0298	.	.	.	.	701501	not_provided	MedGen:CN517202	criteria_provided,_single_submitter	Benign	D	.	0	0	.	.	.	.	.	.	.	0.16	T	0.924
chr10	102920060	102920060	A	G	exonic	CNNM2	.	nonsynonymous SNV	CNNM2:NM_017649:exon1:c.A1580G:p.N527S	exonic	CNNM2;ENST00000369878.8	.	nonsynonymous SNV	CNNM2:ENST00000369875.3:exon1:c.A1580G:p.N527S	exonic	CNNM2	.	nonsynonymous SNV	CNNM2:ENST00000369875.3:exon1:c.A1580G:p.N527S	rs751115904	.	.	.	.	.	.	.	.	.	.	.	.	.	.	.	T	D	3.295e-05	3.295e-05	0	8.637e-05	0	0	2.997e-05	0	6.056e-05	0.32	T	0.721
chr10	116476803	116476803	G	A	exonic	PNLIPRP3	.	nonsynonymous SNV	PNLIPRP3:NM_001011709:exon11:c.G1324A:p.G442R,	exonic	ENST00000369230.3	.	nonsynonymous SNV	ENST00000369230.3:ENST00000369230.3:exon11:c.G1324A:p.G442R,	exonic	PNLIPRP3	.	unknown	UNKNOWN,	rs199630485	0.00239617	.	.	.	0.0123	.	0.0002	.	0.0002	.	.	.	.	.	.	T	D	0.0020	0.002	0	0.0002	0	0	0.0004	0.0034	0.0146	0.01	D	0.985
chr10	119929648	119929648	A	G	exonic	SEC23IP	.	nonsynonymous SNV	SEC23IP:NM_007190:exon14:c.A2355G:p.I785M,	exonic	ENST00000369075.7	.	nonsynonymous SNV	ENST00000369075.7:ENST00000369075.7:exon14:c.A2355G:p.I785M,	exonic	SEC23IP	.	unknown	UNKNOWN,	rs186551854	0.000599042	.	.	.	.	0.003	.	.	.	.	.	.	.	.	.	T	T	0.0002	0.0002	0	0	0.0024	0	0	0	0.0001	0.16	T	0.984
chr10	123053091	123053091	G	A	exonic	ACADSB	.	nonsynonymous SNV	ACADSB:NM_001330174:exon9:c.G853A:p.E285K	exonic	ACADSB	.	nonsynonymous SNV	ACADSB:ENST00000368869.8:exon9:c.G853A:p.E285K	exonic	ACADSB	.	nonsynonymous SNV	ACADSB:ENST00000368869.8:exon9:c.G853A:p.E285K	rs188094280	0.000199681	.	0.0014	.	.	.	0.0002	.	0.0003	.	24242	Deficiency_of_2-methylbutyryl-CoA_dehydrogenase	MedGen:C1864912,OMIM:610006,Orphanet:ORPHA79157,SNOMED_CT:444838008	criteria_provided,_conflicting_interpretations	Conflicting_interpretations_of_pathogenicity	T	D	0.0003	0.0003	0.0002	0.0006	0	0	0.0005	0	0	0.03	D	0.726
chr10	125775721	125775721	G	A	exonic	MMP21	.	nonsynonymous SNV	MMP21:NM_147191:exon1:c.C101T:p.S34L,	exonic	MMP21	.	nonsynonymous SNV	MMP21:ENST00000368808.3:exon1:c.C101T:p.S34L,	exonic	MMP21	.	nonsynonymous SNV	MMP21:ENST00000368808.3:exon1:c.C101T:p.S34L,	rs147007817	0.00539137	.	.	0.001	0.0266	.	0.0012	0.0002	0.0016	.	692804	not_provided	MedGen:CN517202	criteria_provided,_single_submitter	Benign	D	T	0.0049	0.0049	0.0005	0.0007	0	0.0011	0.0016	0.0079	0.0279	0.01	D	0.909
chr10	126009399	126009399	-	A	exonic	FANK1	.	frameshift insertion	FANK1:NM_001363549:exon11:c.982dupA:p.Q331Afs*27	exonic	FANK1	.	frameshift insertion	FANK1:ENST00000368691.5:exon9:c.811dupA:p.Q274Afs*15	exonic	FANK1	.	frameshift insertion	FANK1:ENST00000368693.5:exon11:c.1000dupA:p.Q337Afs*27	rs773656761	.	.	.	.	.	.	.	.	.	.	.	.	.	.	.	.	.	0.0001	0.0001	0	0	0.0009	0	9.024e-05	0	0.0001	.	.	.
chr10	132859198	132859198	G	A	exonic	CFAP46	.	nonsynonymous SNV	CFAP46:NM_001200049:exon38:c.C5248T:p.P1750S,	exonic	ENST00000368586.9	.	nonsynonymous SNV	ENST00000368586.9:ENST00000368586.9:exon38:c.C5248T:p.P1750S,	exonic	CFAP46	.	unknown	UNKNOWN,	rs117808641	0.00519169	.	0.0029	.	.	0.0238	.	.	.	.	.	.	.	.	.	T	T	0.0010	0.001	0	0.0035	0.0226	0	0.0002	0	0.0005	0.55	T	.
chr10	133199108	133199108	C	T	exonic	KNDC1	.	nonsynonymous SNV	KNDC1:NM_152643:exon14:c.C2600T:p.P867L,	exonic	ENST00000304613.7;KNDC1	.	nonsynonymous SNV	KNDC1:ENST00000368571.2:exon13:c.C2405T:p.P802L	exonic	KNDC1	.	nonsynonymous SNV	KNDC1:ENST00000368571.2:exon13:c.C2405T:p.P802L,	rs199922097	0.00179712	.	.	0.008	0.001	.	0.0032	0.0007	0.0045	.	.	.	.	.	.	D	T	0.0060	0.006	0.0013	0.0011	0	0.0305	0.0082	0.0078	0.0011	0.43	T	0.999
chr11	290006	290006	G	C	exonic	PGGHG	.	nonsynonymous SNV	PGGHG:NM_025092:exon2:c.G190C:p.V64L,	exonic	ENST00000409548.6;PGGHG	.	nonsynonymous SNV	PGGHG:ENST00000409479.5:exon1:c.G190C:p.V64L	exonic	PGGHG	.	nonsynonymous SNV	PGGHG:ENST00000409479.5:exon1:c.G190C:p.V64L	rs540459543	0.000199681	0.0008	.	.	.	.	.	.	.	.	.	.	.	.	.	T	.	0	0	0	0	0	0	0	0	0	0.42	T	0.703
chr11	823586	823586	C	G	exonic	PNPLA2	.	nonsynonymous SNV	PNPLA2:NM_020376:exon6:c.C756G:p.N252K,	exonic	ENST00000336615.8	.	nonsynonymous SNV	ENST00000336615.8:ENST00000336615.8:exon6:c.C756G:p.N252K,	exonic	PNPLA2	.	unknown	UNKNOWN,	rs140201358	0.00439297	.	0.0014	0.0139	0.0072	.	0.0079	0.0027	0.0106	.	254346	Neutral_lipid_storage_disease_with_myopathy|not_specified	MedGen:C1853136,OMIM:610717,Orphanet:ORPHA98908|MedGen:CN169374	criteria_provided,_multiple_submitters,_no_conflicts	Benign	T	T	0.0120	0.012	0.0030	0.0034	0.0003	0.0253	0.0163	0.02	0.0085	0.17	T	0.889
chr11	988619	988619	A	G	exonic	AP2A2	.	nonsynonymous SNV	AP2A2:NM_001242837:exon10:c.A1202G:p.N401S	exonic	AP2A2	.	nonsynonymous SNV	AP2A2:ENST00000332231.9:exon10:c.A1202G:p.N401S	exonic	AP2A2	.	nonsynonymous SNV	AP2A2:ENST00000332231.9:exon10:c.A1202G:p.N401S	rs144441591	0.00119808	.	0.0029	0.004	.	.	0.0029	0.0005	0.0041	.	.	.	.	.	.	T	T	0.0021	0.0021	0.0007	0.0016	0	0	0.0033	0.0011	0.0002	0.06	T	0.994
chr11	1226857	1226857	G	A	exonic	MUC5B	.	nonsynonymous SNV	MUC5B:NM_002458:exon4:c.G442A:p.V148I,	exonic	MUC5B	.	nonsynonymous SNV	MUC5B:ENST00000529681.5:exon4:c.G442A:p.V148I,	exonic	MUC5B	.	nonsynonymous SNV	MUC5B:ENST00000529681.5:exon4:c.G442A:p.V148I,	rs56293203	0.00499201	.	0.0058	0.0149	0.0061	.	0.0073	0.0017	0.0100	.	175096	not_specified	MedGen:CN169374	criteria_provided,_single_submitter	Benign	T	T	0.0102	0.0102	0.0026	0.0071	0	0.0160	0.0130	0.0112	0.0082	0	D	0.886
chr11	2299635	2299635	-	G	exonic	C11orf21	.	frameshift insertion	C11orf21:NM_001329958:exon3:c.219dupC:p.T74Hfs*4	exonic	C11orf21	.	frameshift insertion	C11orf21:ENST00000381153.7:exon3:c.219dupC:p.T74Hfs*4	exonic	C11orf21	.	frameshift insertion	C11orf21:ENST00000381153.7:exon3:c.219dupC:p.T74Hfs*4,	rs3214127	0.00499201	.	.	.	0.002	0.0228	0.0005	.	0.0007	.	.	.	.	.	.	.	.	0.0020	0.002	0	0	0.0257	0	0.0006	0.0049	0.0025	.	.	.
chr11	3667691	3667691	C	T	exonic	CHRNA10	.	nonsynonymous SNV	CHRNA10:NM_020402:exon4:c.G436A:p.A146T,	exonic	CHRNA10	.	nonsynonymous SNV	CHRNA10:ENST00000250699.2:exon4:c.G436A:p.A146T,	exonic	CHRNA10	.	nonsynonymous SNV	CHRNA10:ENST00000250699.2:exon4:c.G436A:p.A146T,	rs200221704	0.000599042	.	.	0.003	.	.	0.0011	0.0002	0.0016	.	.	.	.	.	.	D	T	0.0024	0.0024	0	0.0012	0	0.0108	0.0038	0	0.0011	0	D	0.694
chr11	5634746	5634746	C	T	exonic	TRIM34;TRIM6-TRIM34	.	nonsynonymous SNV	TRIM34:NM_130390:exon3:c.C635T:p.T212M	exonic	TRIM34;TRIM6-TRIM34	.	nonsynonymous SNV	TRIM34:ENST00000429814.2:exon4:c.C635T:p.T212M	exonic	TRIM34;TRIM6-TRIM34	.	nonsynonymous SNV	TRIM34:ENST00000429814.2:exon4:c.C635T:p.T212M	rs139090035	.	.	.	.	.	.	0.0002	.	0.0003	ID=COSM928488,COSM928489;OCCURENCE=1(endometrium)	.	.	.	.	.	D	T	7.418e-05	7.418e-05	0	0.0002	0	0	0.0001	0	0	0.01	D	0.902
chr11	6640369	6640369	G	T	exonic	DCHS1	.	nonsynonymous SNV	DCHS1:NM_003737:exon2:c.C1245A:p.S415R,	exonic	ENST00000299441.4	.	nonsynonymous SNV	ENST00000299441.4:ENST00000299441.4:exon2:c.C1245A:p.S415R,	exonic	DCHS1	.	unknown	UNKNOWN,	rs117368891	0.00299521	0.0008	0.0029	0.0109	0.001	.	0.0075	0.0018	0.0105	.	439086	not_provided	MedGen:CN517202	criteria_provided,_multiple_submitters,_no_conflicts	Benign/Likely_benign	T	T	0.0065	0.0065	0.0015	0.0022	0	0.0047	0.0104	0.0049	0.0005	0.4	T	0.998
chr11	7042751	7042751	G	A	exonic	NLRP14	.	nonsynonymous SNV	NLRP14:NM_176822:exon4:c.G725A:p.G242D,	exonic	NLRP14	.	nonsynonymous SNV	NLRP14:ENST00000299481.4:exon4:c.G725A:p.G242D,	exonic	NLRP14	.	nonsynonymous SNV	NLRP14:ENST00000299481.4:exon4:c.G725A:p.G242D,	rs78572085	0.00219649	.	.	.	.	0.0109	.	.	.	.	.	.	.	.	.	T	T	0.0010	0.001	9.632e-05	0	0.0132	0	0	0	0.0004	0.28	T	0.748
chr11	7695573	7695573	G	A	exonic	OVCH2	.	nonsynonymous SNV	OVCH2:NM_198185:exon11:c.C1279T:p.P427S,	exonic	OVCH2	.	nonsynonymous SNV	OVCH2:ENST00000533663.5:exon11:c.C1279T:p.P427S	exonic	OVCH2	.	nonsynonymous SNV	OVCH2:ENST00000533663.5:exon11:c.C1279T:p.P427S	rs186255261	0.000798722	.	.	0.004	.	.	0.0008	.	0.0012	.	.	.	.	.	.	.	.	0.0016	0.0016	0	0.0002	0	0.0105	0.0016	0.0060	0.0006	0.06	T	0.959
chr11	8624903	8624903	T	G	exonic	TRIM66	.	nonsynonymous SNV	TRIM66:NM_014818:exon11:c.A2201C:p.Q734P,	exonic	TRIM66	.	nonsynonymous SNV	TRIM66:ENST00000299550.10:exon11:c.A2201C:p.Q734P	exonic	TRIM66	.	nonsynonymous SNV	TRIM66:ENST00000299550.10:exon11:c.A2201C:p.Q734P	rs145587315	0.00579073	.	.	0.004	0.001	0.0238	.	.	.	.	.	.	.	.	.	D	T	0.0023	0.0023	0	0	0.0147	0.0179	0.0005	0.0127	0.0006	0.34	T	0.967
chr11	10626333	10626333	A	C	exonic	MRVI1	.	nonsynonymous SNV	MRVI1:NM_001206881:exon7:c.T56G:p.L19R	exonic	MRVI1	.	nonsynonymous SNV	MRVI1:ENST00000424001.5:exon7:c.T56G:p.L19R	exonic	MRVI1	.	nonsynonymous SNV	MRVI1:ENST00000424001.5:exon7:c.T56G:p.L19R	rs200197925	0.000199681	.	.	0.001	.	.	0.0003	.	0.0005	.	.	.	.	.	.	D	T	0.0006	0.0006	0	0.0006	0	0.0002	0.0007	0.0036	0.0008	0.05	D	0.896
chr11	16826520	16826520	G	A	exonic	PLEKHA7	.	nonsynonymous SNV	PLEKHA7:NM_001329630:exon10:c.C943T:p.R315W	exonic	ENST00000531066.5;PLEKHA7	.	nonsynonymous SNV	PLEKHA7:ENST00000355661.7:exon10:c.C943T:p.R315W	exonic	PLEKHA7	.	nonsynonymous SNV	PLEKHA7:ENST00000355661.7:exon10:c.C943T:p.R315W,	rs79143472	0.00519169	.	0.0058	0.0179	0.002	0.002	0.0132	0.0039	0.0179	.	.	.	.	.	.	D	T	0.0130	0.013	0.0035	0.0160	0.0006	0.0088	0.0181	0.0198	0.0045	0.03	D	0.987
chr11	17612653	17612653	T	C	exonic	OTOG	.	nonsynonymous SNV	OTOG:NM_001277269:exon37:c.T6362C:p.V2121A	exonic	ENST00000399391.6;OTOG	.	nonsynonymous SNV	ENST00000399391.6:ENST00000399391.6:exon37:c.T6362C:p.V2121A	exonic	OTOG	.	nonsynonymous SNV	OTOG:ENST00000399391.6:exon37:c.T6362C:p.V2121A	rs182000850	0.00119808	.	.	0.004	0.001	0.001	.	.	.	.	497198	not_specified	MedGen:CN169374	criteria_provided,_single_submitter	Benign	T	T	0.0089	0.0089	0	0	0	0.0993	0.0023	0.0109	0.0013	0.22	T	0.525
chr11	18718721	18718721	C	T	exonic	IGSF22	.	nonsynonymous SNV	IGSF22:NM_173588:exon8:c.G704A:p.R235Q,	exonic	IGSF22	.	nonsynonymous SNV	IGSF22:ENST00000319338.6:exon8:c.G704A:p.R235Q	exonic	IGSF22	.	nonsynonymous SNV	IGSF22:ENST00000513874.5:exon8:c.G704A:p.R235Q,	rs74743312	0.00299521	.	0.0058	0.008	0.002	0.001	0.0077	0.0027	0.0100	.	.	.	.	.	.	T	T	0.0057	0.0057	0.0016	0.0038	0.0001	0.0020	0.0088	0.0091	0.0013	0.7	T	0.958
chr11	21574993	21574993	G	A	exonic	NELL1	.	nonsynonymous SNV	NELL1:NM_001288714:exon19:c.G2233A:p.V745M	exonic	ENST00000357134.9;NELL1	.	nonsynonymous SNV	NELL1:ENST00000325319.9:exon19:c.G2233A:p.V745M	exonic	NELL1	.	nonsynonymous SNV	NELL1:ENST00000325319.9:exon19:c.G2233A:p.V745M	rs201257099	.	.	.	.	.	.	7.7e-05	0.0002	.	.	.	.	.	.	.	D	T	0.0001	0.0001	9.639e-05	0	0	0	0.0002	0	6.075e-05	0.09	T	0.999
chr11	31789913	31789914	TT	-	exonic	PAX6	.	frameshift deletion	PAX6:NM_001368929:exon9:c.730_731del:p.K244Gfs*7	exonic	PAX6	.	frameshift deletion	PAX6:ENST00000638685.1:exon8:c.625_626del:p.K209Gfs*7	exonic	PAX6	.	frameshift deletion	PAX6:ENST00000638685.1:exon8:c.625_626del:p.K209Gfs*7	rs759391101	.	.	.	.	.	.	.	.	.	.	.	.	.	.	.	.	.	0.0009	0.0009	0.0005	0.0007	0.0008	0.0027	0.0009	0.0027	0.0010	.	.	.
chr11	32653211	32653211	A	G	exonic	CCDC73	.	nonsynonymous SNV	CCDC73:NM_001008391:exon12:c.T851C:p.F284S,	exonic	CCDC73	.	nonsynonymous SNV	CCDC73:ENST00000335185.9:exon12:c.T851C:p.F284S,	exonic	CCDC73	.	nonsynonymous SNV	CCDC73:ENST00000335185.9:exon12:c.T851C:p.F284S,	rs79980328	0.00339457	.	0.0043	0.0089	0.0051	.	0.0079	0.0016	0.0108	.	.	.	.	.	.	D	.	0.0075	0.0075	0.0020	0.0017	0	0.0142	0.0097	0.0123	0.0068	0.21	T	0.989
chr11	32760227	32760227	T	C	exonic	CCDC73	.	nonsynonymous SNV	CCDC73:NM_001008391:exon2:c.A17G:p.N6S,	exonic	CCDC73	.	nonsynonymous SNV	CCDC73:ENST00000335185.9:exon2:c.A17G:p.N6S	exonic	CCDC73	.	nonsynonymous SNV	CCDC73:ENST00000335185.9:exon2:c.A17G:p.N6S	rs117530589	0.00359425	0.0008	0.0058	0.0119	0.001	.	0.0064	0.0019	0.0084	.	.	.	.	.	.	T	.	0.0049	0.0049	0.0011	0.0033	0	0.0033	0.0076	0.0056	0.0002	0.07	T	0.571
chr11	34888306	34888306	C	T	exonic	APIP	.	nonsynonymous SNV	APIP:NM_015957:exon5:c.G448A:p.G150R,	exonic	APIP;ENST00000395787.3	.	nonsynonymous SNV	APIP:ENST00000532428.6:exon3:c.G307A:p.G103R	exonic	APIP	.	unknown	UNKNOWN,	rs140838755	0.000199681	0.0008	.	.	.	.	.	.	.	.	.	.	.	.	.	T	T	5.817e-05	5.817e-05	9.907e-05	0	0	0.0002	3.017e-05	0.0011	0.0001	0.05	D	0.993
chr11	46311152	46311152	C	T	exonic	CREB3L1	.	nonsynonymous SNV	CREB3L1:NM_052854:exon5:c.C716T:p.T239M,	exonic	ENST00000621158.4	.	nonsynonymous SNV	ENST00000621158.4:ENST00000621158.4:exon5:c.C716T:p.T239M,	exonic	CREB3L1	.	nonsynonymous SNV	CREB3L1:ENST00000621158.4:exon5:c.C716T:p.T239M,	rs192179218	0.0141773	0.0015	0.0922	0.002	.	0.003	0.0005	0.0003	0.0006	.	.	.	.	.	.	.	.	0.0123	0.0123	0.0010	0.1157	0.0015	0.0018	0.0008	0.0134	0.0005	0.09	T	0.899
chr11	46542482	46542482	C	T	exonic	AMBRA1	.	nonsynonymous SNV	AMBRA1:NM_001300731:exon7:c.G1535A:p.R512Q	exonic	AMBRA1	.	nonsynonymous SNV	AMBRA1:ENST00000458649.6:exon7:c.G1535A:p.R512Q	exonic	AMBRA1	.	nonsynonymous SNV	AMBRA1:ENST00000458649.6:exon7:c.G1535A:p.R512Q	rs144724685	0.00199681	.	.	0.001	.	0.0089	0.0003	.	0.0005	.	.	.	.	.	.	D	T	0.0015	0.0015	9.615e-05	0	0.0045	0.0057	0.0014	0.0033	0.0003	0	D	0.999
chr11	46680520	46680520	G	A	exonic	ARHGAP1	.	nonsynonymous SNV	ARHGAP1:NM_004308:exon9:c.C787T:p.L263F,	exonic	ARHGAP1;ENST00000311956.8	.	nonsynonymous SNV	ENST00000311956.8:ENST00000311956.8:exon9:c.C787T:p.L263F,	exonic	ARHGAP1	.	unknown	UNKNOWN,	rs144801476	0.0061901	.	0.0043	0.006	0.0215	0.001	0.0075	0.0020	0.0104	.	724452	not_provided	MedGen:CN517202	criteria_provided,_single_submitter	Benign	D	T	0.0075	0.0075	0.0015	0.0024	0.0002	0.0011	0.0076	0.0056	0.0211	0.12	T	0.944
chr11	47260637	47260637	G	A	exonic	NR1H3	.	nonsynonymous SNV	NR1H3:NM_001130102:exon3:c.G326A:p.R109Q	exonic	ENST00000441012.6;NR1H3	.	nonsynonymous SNV	NR1H3:ENST00000527949.1:exon1:c.G188A:p.R63Q	exonic	NR1H3	.	nonsynonymous SNV	NR1H3:ENST00000527949.1:exon1:c.G188A:p.R63Q	rs762962632	.	.	.	.	.	.	.	.	.	.	.	.	.	.	.	D	D	1.07e-05	1.07e-05	0	0	0	0	1.922e-05	0	0	0	D	1.0
chr11	47347891	47347891	C	T	exonic	MYBPC3	.	nonsynonymous SNV	MYBPC3:NM_000256:exon7:c.G787A:p.G263R,	exonic	ENST00000545968.5;MYBPC3	.	nonsynonymous SNV	MYBPC3:ENST00000256993.8:exon7:c.G787A:p.G263R	exonic	MYBPC3	.	nonsynonymous SNV	MYBPC3:ENST00000256993.8:exon7:c.G787A:p.G263R	rs373730381	.	.	.	.	.	.	8.4e-05	.	0.0001	.	171143	Cardiomyopathy|Hypertrophic_cardiomyopathy|Primary_familial_hypertrophic_cardiomyopathy|Familial_hypertrophic_cardiomyopathy_4|Cardiovascular_phenotype|not_provided	Human_Phenotype_Ontology:HP:0001638,MedGen:C0878544,Orphanet:ORPHA167848,SNOMED_CT:85898001|Human_Phenotype_Ontology:HP:0001639,MedGen:C0007194,Orphanet:ORPHA217569|MeSH:D024741,MedGen:C0949658,Orphanet:ORPHA155,SNOMED_CT:83978005|MedGen:C1861862,OMIM:115197|MedGen:CN230736|MedGen:CN517202	criteria_provided,_multiple_submitters,_no_conflicts	Uncertain_significance	T	T	0.0002	0.0002	0	0	0.0018	0	0.0002	0	0.0001	0.21	T	0.658
chr11	47588282	47588282	G	A	exonic	FAM180B	.	nonsynonymous SNV	FAM180B:NM_001367966:exon2:c.G364A:p.A122T	exonic	ENST00000538490.1	.	nonsynonymous SNV	ENST00000538490.1:ENST00000538490.1:exon3:c.G454A:p.A152T,	exonic	FAM180B	.	unknown	UNKNOWN,	rs762590161	.	.	.	.	.	.	.	.	.	.	.	.	.	.	.	T	T	0.0001	0.0001	0	0	0	0	0.0003	0	0	0.42	T	0.82
chr11	47690268	47690268	A	G	exonic	AGBL2	.	nonsynonymous SNV	AGBL2:NM_024783:exon10:c.T1439C:p.L480P,	exonic	AGBL2;ENST00000525123.5	.	nonsynonymous SNV	AGBL2:ENST00000357610.7:exon9:c.T1439C:p.L480P	exonic	AGBL2	.	nonsynonymous SNV	AGBL2:ENST00000357610.7:exon9:c.T1439C:p.L480P	rs76215382	0.00758786	0.0008	0.0014	0.0109	0.0051	0.0198	0.0124	0.0045	0.0164	.	.	.	.	.	.	D	T	0.0117	0.0117	0.0035	0.0033	0.0290	0.0023	0.0148	0.0055	0.0051	0	D	0.998
chr11	56094047	56094047	T	C	exonic	OR8I2	.	nonsynonymous SNV	OR8I2:NM_001003750:exon1:c.T740C:p.V247A,	exonic	OR8I2	.	nonsynonymous SNV	OR8I2:ENST00000302124.7:exon1:c.T740C:p.V247A,	exonic	OR8I2	.	unknown	UNKNOWN,	rs151296695	0.00219649	.	0.0043	0.003	0.0041	0.001	0.0041	0.0005	0.0059	.	.	.	.	.	.	D	T	0.0043	0.0043	0.0007	0.0026	0	0.0009	0.0055	0.0066	0.0065	0	D	0.643
chr11	56462534	56462534	G	T	exonic	OR5M9	.	nonsynonymous SNV	OR5M9:NM_001004743:exon1:c.C868A:p.L290M,	exonic	AP002512.3;OR5M9	.	nonsynonymous SNV	OR5M9:ENST00000279791.1:exon1:c.C868A:p.L290M	exonic	OR5M9	.	nonsynonymous SNV	OR5M9:ENST00000279791.1:exon1:c.C868A:p.L290M,	rs145474756	0.00658946	.	0.0058	0.008	0.0204	0.001	0.0089	0.0020	0.0125	.	.	.	.	.	.	D	T	0.0110	0.011	0.0018	0.0044	0	0.0183	0.0118	0.0166	0.0210	0.01	D	0.999
chr11	56542413	56542413	G	A	exonic	OR5M11	.	nonsynonymous SNV	OR5M11:NM_001005245:exon1:c.C845T:p.P282L,	exonic	OR5M11	.	nonsynonymous SNV	OR5M11:ENST00000528616.4:exon1:c.C845T:p.P282L,	exonic	OR5M11	.	unknown	UNKNOWN,	rs59345582	0.0151757	.	0.0014	.	0.0051	0.0694	0.0003	0.0005	0.0001	.	.	.	.	.	.	D	T	0.0067	0.0067	0.0002	0.0004	0.0739	0.0056	0.0008	0.0080	0.0035	0	D	1.0
chr11	56664191	56664191	G	A	exonic	OR5AR1	.	nonsynonymous SNV	OR5AR1:NM_001004730:exon1:c.G506A:p.C169Y,	exonic	OR5AR1	.	nonsynonymous SNV	OR5AR1:ENST00000624596.1:exon1:c.G506A:p.C169Y,	exonic	OR5AR1	.	nonsynonymous SNV	OR5AR1:ENST00000624596.1:exon1:c.G506A:p.C169Y,	rs79043854	0.0289537	.	0.0101	0.005	0.0225	0.1101	0.0011	0.0005	0.0014	.	.	.	.	.	.	.	.	0.0121	0.0121	9.61e-05	0.0194	0.0954	0.0018	0.0014	0.0143	0.0179	0.02	D	1.0
chr11	57313408	57313408	C	T	exonic	TNKS1BP1	.	nonsynonymous SNV	TNKS1BP1:NM_033396:exon5:c.G1280A:p.R427Q,	exonic	ENST00000358252.7;TNKS1BP1	.	nonsynonymous SNV	TNKS1BP1:ENST00000532437.1:exon4:c.G1280A:p.R427Q	exonic	TNKS1BP1	.	nonsynonymous SNV	TNKS1BP1:ENST00000532437.1:exon4:c.G1280A:p.R427Q,	rs145672238	0.0179712	.	0.111	0.001	.	0.0119	0.0010	0.0020	0.0005	ID=COSM1229944;OCCURENCE=1(large_intestine)	.	.	.	.	.	D	T	0.0146	0.0146	0.0017	0.1335	0.0123	0	0.0003	0.0084	6.661e-05	0.14	T	1.0
chr11	59151947	59151956	ACTTAAGCTC	-	exonic	FAM111A	.	frameshift deletion	FAM111A:NM_001369457:exon3:c.279_288del:p.L94Hfs*22	exonic	FAM111A	.	frameshift deletion	FAM111A:ENST00000531147.1:exon2:c.279_288del:p.L94Hfs*22	exonic	FAM111A	.	frameshift deletion	FAM111A:ENST00000531147.1:exon2:c.279_288del:p.L94Hfs*22	rs759624749	.	.	.	.	.	.	.	.	.	.	.	.	.	.	.	.	.	0.0001	0.0001	0	0	0	0	0.0002	0	0	.	.	.
chr11	59212337	59212337	C	T	exonic	MPEG1	.	nonsynonymous SNV	MPEG1:NM_001039396:exon1:c.G529A:p.D177N,	exonic	ENST00000361050.3	.	nonsynonymous SNV	ENST00000361050.3:ENST00000361050.3:exon1:c.G529A:p.D177N,	exonic	MPEG1	.	nonsynonymous SNV	MPEG1:ENST00000361050.3:exon1:c.G529A:p.D177N,	rs146004268	0.00179712	.	.	.	.	0.0089	0.0002	.	0.0002	.	738043	not_provided	MedGen:CN517202	criteria_provided,_single_submitter	Likely_benign	T	D	0.0008	0.0008	0	0	0.0093	0	0.0002	0.0022	0	0.31	T	0.98
chr11	61339072	61339072	T	C	exonic	TKFC	.	nonsynonymous SNV	TKFC:NM_001351977:exon4:c.T200C:p.I67T	exonic	TKFC	.	nonsynonymous SNV	TKFC:ENST00000529479.5:exon2:c.T197C:p.I66T	exonic	TKFC	.	nonsynonymous SNV	TKFC:ENST00000394900.7:exon4:c.T200C:p.I67T,	rs74878556	0.00199681	.	0.0014	.	0.002	0.0069	.	.	.	.	.	.	.	.	.	D	T	0.0014	0.0014	0	0.0002	0.0152	0	3.04e-05	0.0034	0.0015	0	D	0.925
chr11	62518249	62518249	G	T	exonic	AHNAK	.	nonsynonymous SNV	AHNAK:NM_001346445:exon5:c.C16168A:p.P5390T	exonic	ENST00000378024.8	.	nonsynonymous SNV	ENST00000378024.8:ENST00000378024.8:exon5:c.C16168A:p.P5390T,	exonic	AHNAK	.	unknown	UNKNOWN,	rs77640901	0.0109824	.	.	0.002	0.001	0.0516	0.0005	0.0002	0.0006	.	.	.	.	.	.	T	T	0.0055	0.0055	0.0002	0.0046	0.0472	0.0048	0.0020	0.0066	0.0019	0.02	D	1.0
chr11	62531125	62531125	C	A	exonic	AHNAK	.	nonsynonymous SNV	AHNAK:NM_001346445:exon5:c.G3292T:p.V1098F	exonic	ENST00000378024.8	.	nonsynonymous SNV	ENST00000378024.8:ENST00000378024.8:exon5:c.G3292T:p.V1098F,	exonic	AHNAK	.	unknown	UNKNOWN,	rs79639272	0.0115815	.	.	0.002	0.002	0.0536	0.0005	0.0002	0.0007	.	.	.	.	.	.	D	T	0.0056	0.0056	0.0002	0.0046	0.0478	0.0048	0.0020	0.0066	0.0020	0.68	T	0.985
chr11	62634863	62634863	C	T	exonic	GANAB	.	nonsynonymous SNV	GANAB:NM_001278192:exon2:c.G176A:p.R59Q	exonic	ENST00000356638.7;GANAB	.	nonsynonymous SNV	GANAB:ENST00000525994.1:exon2:c.G176A:p.R59Q	exonic	GANAB	.	nonsynonymous SNV	GANAB:ENST00000534779.5:exon2:c.G176A:p.R59Q	rs2276295	0.00379393	.	.	.	.	0.0188	7.7e-05	.	0.0001	.	724536	not_provided	MedGen:CN517202	criteria_provided,_single_submitter	Benign	T	D	0.0016	0.0016	0	0	0.0202	0	0.0001	0.0011	0.0008	0.1	T	0.953
chr11	62726657	62726657	C	T	exonic	HNRNPUL2	.	nonsynonymous SNV	HNRNPUL2:NM_001079559:exon1:c.G500A:p.G167E,	exonic	ENST00000301785.6;HNRNPUL2-BSCL2	.	nonsynonymous SNV	ENST00000301785.6:ENST00000301785.6:exon1:c.G500A:p.G167E	exonic	HNRNPUL2;HNRNPUL2-BSCL2	.	nonsynonymous SNV	HNRNPUL2-BSCL2:ENST00000403734.2:exon1:c.G500A:p.G167E,	rs756448008	.	.	.	.	.	.	.	.	.	.	.	.	.	.	.	T	T	0.0001	0.0001	0	0	0	0	0.0002	0	0	0.79	T	0.964
chr11	63304754	63304754	C	A	exonic	SLC22A10	.	nonsynonymous SNV	SLC22A10:NM_001039752:exon9:c.C1463A:p.T488N,	exonic	ENST00000332793.10	.	nonsynonymous SNV	ENST00000332793.10:ENST00000332793.10:exon9:c.C1463A:p.T488N,	exonic	SLC22A10	.	nonsynonymous SNV	SLC22A10:ENST00000332793.10:exon9:c.C1463A:p.T488N,	rs199812058	0.00239617	.	.	0.002	0.001	0.0089	0.0003	.	0.0005	.	.	.	.	.	.	D	T	0.0028	0.0028	0	8.705e-05	0.0205	0.0045	0.0016	0.0044	0.0012	0.03	D	0.987
chr11	65572898	65572898	G	A	exonic	FAM89B	.	nonsynonymous SNV	FAM89B:NM_001098784:exon1:c.G229A:p.A77T	exonic	ENST00000530349.1;FAM89B	.	nonsynonymous SNV	FAM89B:ENST00000316409.2:exon1:c.G229A:p.A77T	exonic	FAM89B	.	nonsynonymous SNV	FAM89B:ENST00000316409.2:exon1:c.G229A:p.A77T	rs372719527	.	.	.	.	.	.	.	.	.	.	.	.	.	.	.	T	.	0	0	.	.	.	.	.	.	0	0.06	T	0.976
chr11	65641112	65641112	C	T	exonic	SIPA1	.	nonsynonymous SNV	SIPA1:NM_006747:exon2:c.C191T:p.T64M	exonic	ENST00000534313.5;SIPA1	.	nonsynonymous SNV	SIPA1:ENST00000394224.3:exon2:c.C191T:p.T64M	exonic	SIPA1	.	nonsynonymous SNV	SIPA1:ENST00000394224.3:exon2:c.C191T:p.T64M	rs200828887	0.000798722	0.0015	.	0.001	0.001	.	0.0006	0.0002	0.0008	.	.	.	.	.	.	D	D	0.0009	0.0009	0.0003	0.0005	0	0.0009	0.0011	0.0014	0.0014	0.07	T	0.872
chr11	66021795	66021795	G	A	exonic	CATSPER1	.	nonsynonymous SNV	CATSPER1:NM_053054:exon3:c.C1514T:p.S505L,	exonic	ENST00000312106.5	.	nonsynonymous SNV	ENST00000312106.5:ENST00000312106.5:exon3:c.C1514T:p.S505L,	exonic	CATSPER1	.	nonsynonymous SNV	CATSPER1:ENST00000312106.5:exon3:c.C1514T:p.S505L,	rs74484098	0.00439297	.	.	.	.	0.0218	0.0002	.	0.0002	.	328555	Male_infertility	Human_Phenotype_Ontology:HP:0003251,MedGen:C0021364,Orphanet:ORPHA98048,SNOMED_CT:2904007	criteria_provided,_single_submitter	Uncertain_significance	T	D	0.0024	0.0024	0	0.0023	0.0267	0	0.0002	0.0033	0.0008	0.23	T	0.659
chr11	75241452	75241452	G	A	exonic	TPBGL	.	nonsynonymous SNV	TPBGL:NM_001195528:exon1:c.G403A:p.G135S,	exonic	ENST00000562197.2	.	nonsynonymous SNV	ENST00000562197.2:ENST00000562197.2:exon1:c.G403A:p.G135S,	exonic	TPBGL	.	nonsynonymous SNV	TPBGL:ENST00000562197.2:exon1:c.G403A:p.G135S,	rs552692995	0.000199681	.	.	0.001	.	.	.	.	.	.	.	.	.	.	.	.	T	0.0014	0.0014	0	0	0	.	0	0	0.0016	.	.	.
chr11	76796238	76796238	C	T	exonic	TSKU	.	nonsynonymous SNV	TSKU:NM_001258210:exon2:c.C622T:p.R208C	exonic	ENST00000333090.4;TSKU	.	nonsynonymous SNV	ENST00000333090.4:ENST00000333090.4:exon2:c.C622T:p.R208C	exonic	TSKU	.	nonsynonymous SNV	TSKU:ENST00000527881.1:exon2:c.C622T:p.R208C	rs3740772	0.0285543	0.0514	0.0231	.	0.0031	0.0556	0.0173	0.0502	0.0005	.	.	.	.	.	.	D	T	0.0144	0.0144	0.0542	0.0406	0.0708	0	0.0005	0.0067	0.0035	0	D	0.999
chr11	85655698	85655698	C	G	exonic	TMEM126A	.	nonsynonymous SNV	TMEM126A:NM_001244735:exon3:c.C175G:p.L59V	exonic	ENST00000304511.6;TMEM126A	.	nonsynonymous SNV	TMEM126A:ENST00000528105.5:exon3:c.C175G:p.L59V	exonic	TMEM126A	.	nonsynonymous SNV	TMEM126A:ENST00000528105.5:exon3:c.C175G:p.L59V	rs546358774	0.000199681	.	.	.	0.001	.	.	.	.	.	177401	not_provided	MedGen:CN517202	criteria_provided,_single_submitter	Uncertain_significance	D	T	0.0004	0.0004	0	0	0	0	0	0.0011	0.0030	.	.	1.0
chr11	86412495	86412495	G	A	exonic	CCDC81	.	nonsynonymous SNV	CCDC81:NM_021827:exon10:c.G1057A:p.E353K	exonic	CCDC81;ENST00000445632.6	.	nonsynonymous SNV	CCDC81:ENST00000528728.1:exon6:c.G532A:p.E178K	exonic	CCDC81	.	nonsynonymous SNV	CCDC81:ENST00000528728.1:exon6:c.G532A:p.E178K	rs148008941	0.00179712	0.0008	0.0014	0.006	0.001	.	0.0047	0.0016	0.0063	.	.	.	.	.	.	T	T	0.0048	0.0048	0.0016	0.0035	0.0003	0.0113	0.0065	0.0033	0.0009	.	.	0.972
chr11	96093321	96093321	T	C	exonic	MAML2	.	nonsynonymous SNV	MAML2:NM_032427:exon2:c.A710G:p.Q237R,	exonic	ENST00000524717.5;MAML2	.	nonsynonymous SNV	MAML2:ENST00000618849.1:exon1:c.A200G:p.Q67R	exonic	MAML2	.	nonsynonymous SNV	MAML2:ENST00000618849.1:exon1:c.A200G:p.Q67R,	rs61749253	0.00539137	0.0015	0.0043	0.0209	0.001	.	0.0146	0.0031	0.0200	.	.	.	.	.	.	T	T	0.0140	0.014	0.0027	0.0051	0	0.0376	0.0190	0.0144	0.0047	0.49	T	0.982
chr11	104037130	104037130	G	C	exonic	DDI1	.	nonsynonymous SNV	DDI1:NM_001001711:exon1:c.G308C:p.G103A,	exonic	ENST00000302259.4	.	nonsynonymous SNV	ENST00000302259.4:ENST00000302259.4:exon1:c.G308C:p.G103A,	exonic	DDI1	.	nonsynonymous SNV	DDI1:ENST00000302259.4:exon1:c.G308C:p.G103A,	rs115094910	0.00599042	.	.	0.005	.	0.0248	7.7e-05	.	0.0001	.	.	.	.	.	.	D	T	0.0035	0.0035	0	0	0.0205	0.0231	0.0013	0.0088	0.0004	0.08	T	0.96
chr11	111719881	111719881	C	T	exonic	SIK2	.	nonsynonymous SNV	SIK2:NM_015191:exon10:c.C1373T:p.T458I,	exonic	ENST00000304987.3	.	nonsynonymous SNV	ENST00000304987.3:ENST00000304987.3:exon10:c.C1373T:p.T458I,	exonic	SIK2	.	unknown	UNKNOWN,	rs35789057	0.000599042	0.0015	.	0.001	.	.	0.0012	.	0.0017	.	.	.	.	.	.	D	T	0.0014	0.0014	0.0003	0.0003	0	0.0082	0.0017	0	0	0.1	T	0.982
chr11	117179294	117179294	C	G	exonic	SIDT2	.	nonsynonymous SNV	SIDT2:NM_001040455:exon1:c.C31G:p.L11V,	exonic	ENST00000324225.8;SIDT2	.	nonsynonymous SNV	SIDT2:ENST00000278951.11:exon1:c.C31G:p.L11V	exonic	SIDT2	.	nonsynonymous SNV	SIDT2:ENST00000324225.8:exon1:c.C31G:p.L11V	rs76634080	0.00219649	.	.	.	.	0.0109	0.0002	.	0.0002	.	.	.	.	.	.	D	T	0.0008	0.0008	0	0.0003	0.0102	0	3.022e-05	0	0.0006	0.44	T	0.512
chr11	117351975	117351975	C	A	exonic	CEP164	.	nonsynonymous SNV	CEP164:NM_001271933:exon4:c.C380A:p.P127H	exonic	CEP164;ENST00000278935.7	.	nonsynonymous SNV	CEP164:ENST00000533153.5:exon3:c.C242A:p.P81H	exonic	CEP164	.	unknown	UNKNOWN,	rs143659874	0.00179712	.	0.0014	0.008	.	.	0.0032	0.0007	0.0046	.	408273	not_provided	MedGen:CN517202	criteria_provided,_conflicting_interpretations	Conflicting_interpretations_of_pathogenicity	D	T	0.0037	0.0037	0.0011	0.0029	0	0.0023	0.0065	0.0025	0	.	.	0.992
chr11	118638958	118638958	G	A	exonic	PHLDB1	.	nonsynonymous SNV	PHLDB1:NM_001144758:exon11:c.G2603A:p.R868H	exonic	ENST00000600882.5;PHLDB1	.	nonsynonymous SNV	PHLDB1:ENST00000534140.2:exon5:c.G569A:p.R190H	exonic	PHLDB1	.	nonsynonymous SNV	PHLDB1:ENST00000356063.9:exon11:c.G2603A:p.R868H	rs2298484	0.00978435	.	.	.	0.0092	0.0397	0.0002	0.0002	0.0001	.	.	.	.	.	.	T	T	0.0043	0.0043	0.0002	0.0002	0.0461	0.0002	0.0003	0.0012	0.0053	0.65	T	1.0
chr11	118661667	118661667	A	G	exonic	TREH	.	nonsynonymous SNV	TREH:NM_007180:exon6:c.T587C:p.M196T,	exonic	ENST00000264029.8	.	nonsynonymous SNV	ENST00000264029.8:ENST00000264029.8:exon6:c.T587C:p.M196T,	exonic	TREH	.	nonsynonymous SNV	TREH:ENST00000264029.8:exon6:c.T587C:p.M196T,	rs147473566	0.00978435	.	.	.	0.0092	0.0397	0.0002	0.0002	0.0001	.	.	.	.	.	.	D	T	0.0041	0.0041	0.0002	8.645e-05	0.0452	0.0002	0.0003	0.0011	0.0050	0.02	D	0.998
chr11	118957277	118957277	G	A	exonic	UPK2	.	nonsynonymous SNV	UPK2:NM_006760:exon3:c.G278A:p.G93D,	exonic	ENST00000264031.2	.	nonsynonymous SNV	ENST00000264031.2:ENST00000264031.2:exon3:c.G278A:p.G93D,	exonic	UPK2	.	unknown	UNKNOWN,	rs141565726	0.00519169	.	0.0231	0.004	0.001	0.005	0.0008	0.0009	0.0008	.	712636	not_provided	MedGen:CN517202	criteria_provided,_single_submitter	Benign	T	T	0.0053	0.0053	0.0008	0.0376	0.0089	0.0091	0.0008	0.0066	0.0002	0.72	T	0.983
chr11	124185313	124185313	T	C	exonic	OR10D3	.	nonsynonymous SNV	OR10D3:NM_001355213:exon1:c.T44C:p.L15S,	exonic	OR10D3	.	nonsynonymous SNV	OR10D3:ENST00000318666.6:exon1:c.T44C:p.L15S	exonic	OR10D3	.	nonsynonymous SNV	OR10D3:ENST00000318666.6:exon1:c.T44C:p.L15S,	rs574183941	.	.	.	.	.	.	.	.	.	.	.	.	.	.	.	T	T	0.0019	0.0019	0	0	0	0.0135	0.0015	0	0	0.05	D	.
chr12	1141762	1141762	G	A	exonic	ERC1	.	nonsynonymous SNV	ERC1:NM_001301248:exon7:c.G1712A:p.R571Q	exonic	ENST00000360905.8;ERC1	.	nonsynonymous SNV	ERC1:ENST00000611180.4:exon2:c.G812A:p.R271Q	exonic	ERC1	.	nonsynonymous SNV	ERC1:ENST00000611180.4:exon2:c.G812A:p.R271Q	rs201281749	0.000199681	0.0008	.	.	.	.	.	.	.	.	.	.	.	.	.	T	D	0.0001	0.0001	0	0	0.0012	0	6.053e-05	0	0	0.6	T	1.0
chr12	5732874	5732874	G	A	exonic	ANO2	.	nonsynonymous SNV	ANO2:NM_001278596:exon14:c.C1441T:p.R481C	exonic	ANO2	.	nonsynonymous SNV	ANO2:ENST00000327087.12:exon15:c.C1429T:p.R477C	exonic	ANO2	.	nonsynonymous SNV	ANO2:ENST00000327087.12:exon15:c.C1429T:p.R477C	rs149972273	0.0113818	0.0008	.	0.001	0.0276	0.0278	0.0010	0.0007	0.0011	.	713674	not_provided	MedGen:CN517202	criteria_provided,_single_submitter	Benign	T	T	0.0061	0.0061	0.0011	0.0011	0.0257	0	0.0009	0.0034	0.0263	0.04	D	0.969
chr12	6057965	6057965	G	A	exonic	VWF	.	nonsynonymous SNV	VWF:NM_000552:exon14:c.C1613T:p.P538L,	exonic	VWF	.	nonsynonymous SNV	VWF:ENST00000261405.9:exon14:c.C1613T:p.P538L,	exonic	VWF	.	nonsynonymous SNV	VWF:ENST00000261405.9:exon14:c.C1613T:p.P538L,	rs139196998	0.000599042	.	.	.	.	0.003	7.7e-05	0.0002	.	.	789537	not_provided	MedGen:CN517202	criteria_provided,_single_submitter	Uncertain_significance	T	T	0.0004	0.0004	0.0001	0	0.0047	0	6.14e-05	0	0	0.22	T	1.0
chr12	6975308	6975308	G	A	exonic	EMG1	.	nonsynonymous SNV	EMG1:NM_006331:exon5:c.G551A:p.S184N,	exonic	EMG1;ENST00000599672.5	.	nonsynonymous SNV	EMG1:ENST00000261406.7:exon5:c.G533A:p.S178N	exonic	EMG1	.	unknown	UNKNOWN,	rs781937222	.	.	.	.	.	.	.	.	.	.	.	.	.	.	.	.	T	0.0001	0.0001	0	0	0.0010	0	4.16e-05	0	7.462e-05	.	.	.
chr12	7649551	7649551	C	T	exonic	APOBEC1	.	nonsynonymous SNV	APOBEC1:NM_005889:exon4:c.G572A:p.R191K	exonic	ENST00000229304.4	.	nonsynonymous SNV	ENST00000229304.4:ENST00000229304.4:exon5:c.G707A:p.R236K,	exonic	APOBEC1	.	unknown	UNKNOWN,	rs12820011	0.000399361	.	0.0014	0.001	.	.	0.0011	.	0.0016	.	.	.	.	.	.	D	T	0.0007	0.0007	0.0002	0.0005	0	0	0.0011	0	0.0001	0.07	T	0.984
chr12	9181030	9181030	G	A	exonic	PZP	.	stopgain	PZP:NM_002864:exon15:c.C1792T:p.Q598X,	exonic	ENST00000261336.6	.	stopgain	ENST00000261336.6:ENST00000261336.6:exon15:c.C1792T:p.Q598X,	exonic	PZP	.	unknown	UNKNOWN,	rs117889746	0.0151757	0.0008	.	.	0.0041	0.0704	.	.	.	.	.	.	.	.	.	.	.	0.0063	0.0063	0.0002	8.685e-05	0.0830	0	0.0002	0.0055	0.0013	0.3	T	.
chr12	10506039	10506039	C	T	exonic	EIF2S3B	.	nonsynonymous SNV	EIF2S3B:NM_001357731:exon1:c.C137T:p.T46I	exonic	EIF2S3B	.	nonsynonymous SNV	EIF2S3B:ENST00000322446.3:exon1:c.C137T:p.T46I	exonic	EIF2S3L	.	nonsynonymous SNV	EIF2S3L:ENST00000322446.3:exon1:c.C137T:p.T46I	rs146449943	0.00858626	0.0008	.	.	.	0.0417	.	.	.	.	.	.	.	.	.	D	T	0.0035	0.0035	0.0008	0.0002	0.0465	0	4.496e-05	0.0022	0.0003	0.02	D	.
chr12	10809138	10809138	T	C	exonic	TAS2R9	.	stoploss	TAS2R9:NM_023917:exon1:c.A938G:p.X313W,	exonic	TAS2R9	.	stoploss	TAS2R9:ENST00000240691.4:exon1:c.A938G:p.X313W,	exonic	TAS2R9	.	stoploss	TAS2R9:ENST00000240691.4:exon1:c.A938G:p.X313W,	rs751689440	.	.	.	.	.	.	.	.	.	.	.	.	.	.	.	.	.	8.975e-06	8.975e-06	0	0	0	0	1.571e-05	0	0	.	.	.
chr12	10809423	10809423	C	T	exonic	TAS2R9	.	nonsynonymous SNV	TAS2R9:NM_023917:exon1:c.G653A:p.G218E,	exonic	TAS2R9	.	nonsynonymous SNV	TAS2R9:ENST00000240691.4:exon1:c.G653A:p.G218E,	exonic	TAS2R9	.	nonsynonymous SNV	TAS2R9:ENST00000240691.4:exon1:c.G653A:p.G218E,	rs113883583	0.0121805	0.0257	0.0043	0.003	0.0215	.	0.0097	0.0204	0.0042	.	713304	not_provided	MedGen:CN517202	criteria_provided,_single_submitter	Benign	D	T	0.0082	0.0082	0.0200	0.0046	0	0	0.0042	0.0132	0.0263	0	D	0.996
chr12	10986706	10986706	G	A	exonic	TAS2R50	.	nonsynonymous SNV	TAS2R50:NM_176890:exon1:c.C155T:p.A52V,	exonic	TAS2R50	.	nonsynonymous SNV	TAS2R50:ENST00000506868.1:exon1:c.C155T:p.A52V,	exonic	TAS2R50	.	nonsynonymous SNV	TAS2R50:ENST00000506868.1:exon1:c.C155T:p.A52V,	rs142843602	0.00539137	.	.	.	0.001	0.0258	7.7e-05	0.0002	.	.	.	.	.	.	.	T	T	0.0021	0.0021	0.0005	0.0002	0.0250	0	0	0.0044	0.0018	0.09	T	0.983
chr12	12465675	12465675	G	A	exonic	BORCS5	.	nonsynonymous SNV	BORCS5:NM_001330356:exon3:c.G346A:p.D116N	exonic	BORCS5;ENST00000314565.8	.	nonsynonymous SNV	BORCS5:ENST00000298571.6:exon3:c.G346A:p.D116N	exonic	BORCS5	.	nonsynonymous SNV	BORCS5:ENST00000298571.6:exon3:c.G346A:p.D116N	rs199869851	0.000798722	.	0.0014	.	.	0.003	.	.	.	ID=COSM266839;OCCURENCE=1(large_intestine)	.	.	.	.	.	T	T	0.0003	0.0003	9.697e-05	0.0013	0.0020	0	0	0	0.0004	0.68	T	0.836
chr12	43452396	43452396	G	T	exonic	ADAMTS20	.	nonsynonymous SNV	ADAMTS20:NM_025003:exon14:c.C1957A:p.R653S,	exonic	ADAMTS20;ENST00000389420.7	.	nonsynonymous SNV	ENST00000389420.7:ENST00000389420.7:exon14:c.C1957A:p.R653S	exonic	ADAMTS20	.	nonsynonymous SNV	ADAMTS20:ENST00000389420.7:exon14:c.C1957A:p.R653S	rs79065113	0.00319489	.	.	.	0.002	0.0139	0.0004	.	0.0006	.	.	.	.	.	.	D	T	0.0016	0.0016	0	8.769e-05	0.0165	0	0.0006	0.0022	0.0008	0.01	D	0.998
chr12	48145125	48145125	G	A	exonic	PFKM	.	nonsynonymous SNV	PFKM:NM_001166688:exon20:c.G2087A:p.R696H	exonic	ENST00000340802.11;ENST00000359794.10;ENST00000549941.6;PFKM	.	nonsynonymous SNV	ENST00000549941.6:ENST00000549941.6:exon19:c.G1928A:p.R643H	exonic	PFKM	.	nonsynonymous SNV	PFKM:ENST00000547587.5:exon20:c.G2087A:p.R696H	rs41291971	0.00379393	0.0008	0.0014	0.0149	0.002	.	0.0121	0.0039	0.0164	.	254585	Glycogen_storage_disease,_type_VII|not_specified|not_provided	MedGen:C0017926,OMIM:232800,Orphanet:ORPHA371,SNOMED_CT:89597008|MedGen:CN169374|MedGen:CN517202	criteria_provided,_conflicting_interpretations	Conflicting_interpretations_of_pathogenicity	T	T	0.0097	0.0097	0.0023	0.0058	0.0016	0.0089	0.0145	0.0066	0.0023	0.18	T	0.995
chr12	50330661	50330661	G	C	exonic	FAM186A	.	nonsynonymous SNV	FAM186A:NM_001145475:exon7:c.C6946G:p.Q2316E,	exonic	ENST00000327337.5;FAM186A	.	nonsynonymous SNV	FAM186A:ENST00000543096.5:exon4:c.C979G:p.Q327E	exonic	FAM186A	.	nonsynonymous SNV	FAM186A:ENST00000543096.5:exon4:c.C979G:p.Q327E	rs12809349	0.00519169	.	0.0043	0.0229	.	.	.	.	.	.	.	.	.	.	.	D	T	0.0107	0.0107	0.0042	0.0093	0	0.0124	0.0215	0.0155	0	0	D	0.551
chr12	52546413	52546413	C	T	exonic	KRT71	.	nonsynonymous SNV	KRT71:NM_033448:exon7:c.G1198A:p.A400T,	exonic	ENST00000267119.5	.	nonsynonymous SNV	ENST00000267119.5:ENST00000267119.5:exon7:c.G1198A:p.A400T,	exonic	KRT71	.	nonsynonymous SNV	KRT71:ENST00000267119.5:exon7:c.G1198A:p.A400T,	rs140706935	.	.	.	.	.	.	0.0003	.	0.0005	.	.	.	.	.	.	D	D	0.0003	0.0003	0	0	0	0.0002	0.0004	0	6.058e-05	0	D	1.0
chr12	52610712	52610712	G	A	exonic	KRT73	.	nonsynonymous SNV	KRT73:NM_175068:exon7:c.C1234T:p.R412W,	exonic	KRT73	.	nonsynonymous SNV	KRT73:ENST00000552855.1:exon4:c.C469T:p.R157W	exonic	KRT73	.	nonsynonymous SNV	KRT73:ENST00000305748.7:exon7:c.C1234T:p.R412W,	rs182533890	0.000399361	.	.	.	0.001	0.001	7.7e-05	0.0002	.	.	.	.	.	.	.	D	D	0.0003	0.0003	9.615e-05	0	0.0001	0	5.995e-05	0	0.0016	0	D	1.0
chr12	55321464	55321464	A	C	exonic	OR6C1	.	nonsynonymous SNV	OR6C1:NM_001005182:exon1:c.A865C:p.S289R,	exonic	OR6C1	.	nonsynonymous SNV	OR6C1:ENST00000379668.3:exon1:c.A865C:p.S289R	exonic	OR6C1	.	nonsynonymous SNV	OR6C1:ENST00000379668.3:exon1:c.A865C:p.S289R,	rs141094641	0.00139776	0.0008	0.0043	0.002	0.001	.	0.0052	0.0011	0.0072	.	.	.	.	.	.	D	T	0.0054	0.0054	0.0010	0.0061	0.0001	0.0006	0.0076	0.0110	0.0036	0	D	0.575
chr12	55469799	55469799	C	A	exonic	OR6C70	.	nonsynonymous SNV	OR6C70:NM_001005499:exon1:c.G340T:p.A114S,	exonic	OR6C70	.	nonsynonymous SNV	OR6C70:ENST00000327335.4:exon1:c.G340T:p.A114S,	exonic	OR6C70	.	nonsynonymous SNV	OR6C70:ENST00000327335.4:exon1:c.G340T:p.A114S,	rs148047600	0.00678914	.	.	.	.	0.0337	0.0002	0.0007	.	.	.	.	.	.	.	D	T	0.0025	0.0025	0.0002	0.0002	0.0333	0.0002	1.5e-05	0.0011	0.0005	0.01	D	0.894
chr12	56026841	56026841	A	G	exonic	IKZF4	.	nonsynonymous SNV	IKZF4:NM_001351090:exon3:c.A212G:p.D71G	exonic	ENST00000547167.5;IKZF4	.	nonsynonymous SNV	IKZF4:ENST00000547791.2:exon3:c.A212G:p.D71G	exonic	IKZF4	.	nonsynonymous SNV	IKZF4:ENST00000547791.2:exon3:c.A212G:p.D71G	rs759172907	.	.	.	.	.	.	.	.	.	.	.	.	.	.	.	T	T	8.415e-06	8.415e-06	0	0	0	0	1.513e-05	0	0	0.25	T	0.545
chr12	71144171	71144171	C	T	exonic	TSPAN8	.	nonsynonymous SNV	TSPAN8:NM_001369760:exon2:c.G103A:p.V35I	exonic	ENST00000247829.7;TSPAN8	.	nonsynonymous SNV	TSPAN8:ENST00000546561.2:exon2:c.G103A:p.V35I	exonic	TSPAN8	.	nonsynonymous SNV	TSPAN8:ENST00000546561.2:exon2:c.G103A:p.V35I	rs17849952	0.00399361	0.0008	0.0014	0.0149	0.0031	.	0.0098	0.0030	0.0133	.	725269	not_provided	MedGen:CN517202	criteria_provided,_single_submitter	Benign	T	T	0.0095	0.0095	0.0023	0.0027	0	0.0311	0.0116	0.0057	0.0066	0.21	T	0.793
chr12	80355852	80355852	G	A	exonic	OTOGL	.	nonsynonymous SNV	OTOGL:NM_173591:exon46:c.G5683A:p.D1895N	exonic	OTOGL	.	nonsynonymous SNV	OTOGL:ENST00000458043.6:exon46:c.G5683A:p.D1895N	exonic	OTOGL	.	nonsynonymous SNV	OTOGL:ENST00000458043.6:exon46:c.G5683A:p.D1895N,	rs145653077	0.00179712	.	0.0029	0.007	.	.	0.0017	0.0003	0.0024	.	230412	not_specified|not_provided	MedGen:CN169374|MedGen:CN517202	criteria_provided,_multiple_submitters,_no_conflicts	Benign	T	T	0.0050	0.005	0.0002	0.0022	0	0.0379	0.0047	0.0100	0	0.41	T	.
chr12	88125356	88125356	C	T	exonic	CEP290	.	nonsynonymous SNV	CEP290:NM_025114:exon13:c.G1079A:p.R360Q,	exonic	CEP290;ENST00000552810.5	.	nonsynonymous SNV	CEP290:ENST00000604024.5:exon4:c.G245A:p.R82Q	exonic	CEP290	.	nonsynonymous SNV	CEP290:ENST00000309041.11:exon12:c.G1079A:p.R360Q	rs188164241	0.00119808	.	0.0014	0.005	.	.	0.0035	0.0009	0.0046	.	177143	Joubert_syndrome_1|not_specified|not_provided	MedGen:C4551568,OMIM:213300|MedGen:CN169374|MedGen:CN517202	criteria_provided,_conflicting_interpretations	Conflicting_interpretations_of_pathogenicity	D	T	0.0030	0.003	0.0018	0	0	0.0092	0.0045	0.0042	0.0003	0.55	T	1.0
chr12	96297646	96297646	G	A	exonic	CDK17	.	nonsynonymous SNV	CDK17:NM_001170464:exon8:c.C791T:p.T264I	exonic	CDK17;ENST00000261211.7	.	nonsynonymous SNV	CDK17:ENST00000542666.5:exon7:c.C632T:p.T211I	exonic	CDK17	.	nonsynonymous SNV	CDK17:ENST00000542666.5:exon7:c.C632T:p.T211I	rs758304893	.	.	.	.	.	.	.	.	.	.	.	.	.	.	.	D	T	0.0002	0.0002	0	8.637e-05	0.0002	0	0.0002	0	0.0007	0.02	D	0.918
chr12	101720157	101720157	C	T	exonic	CHPT1	.	nonsynonymous SNV	CHPT1:NM_020244:exon5:c.C683T:p.P228L,	exonic	CHPT1;ENST00000229266.7	.	nonsynonymous SNV	ENST00000229266.7:ENST00000229266.7:exon5:c.C683T:p.P228L	exonic	CHPT1	.	nonsynonymous SNV	CHPT1:ENST00000549872.5:exon5:c.C683T:p.P228L,	rs140053199	0.000998403	.	0.0043	0.001	0.001	.	0.0022	0.0007	0.0030	.	.	.	.	.	.	T	T	0.0018	0.0018	0.0011	0.0008	0	0.0008	0.0029	0.0022	0.0001	0.68	T	0.999
chr12	105197780	105197780	G	A	exonic	APPL2	.	nonsynonymous SNV	APPL2:NM_001251904:exon11:c.C1055T:p.T352M	exonic	APPL2;ENST00000258530.7	.	nonsynonymous SNV	ENST00000258530.7:ENST00000258530.7:exon11:c.C1037T:p.T346M	exonic	APPL2	.	nonsynonymous SNV	APPL2:ENST00000539978.6:exon11:c.C908T:p.T303M	rs146420641	.	.	.	.	.	.	.	.	.	.	.	.	.	.	.	D	T	3.301e-05	3.301e-05	0.0002	8.658e-05	0	0	1.5e-05	0	0	0.01	D	1.0
chr12	107688476	107688476	G	A	exonic	PWP1	.	nonsynonymous SNV	PWP1:NM_007062:exon2:c.G101A:p.R34H,	exonic	ENST00000412830.7;PWP1	.	nonsynonymous SNV	ENST00000412830.7:ENST00000412830.7:exon2:c.G101A:p.R34H	exonic	PWP1	.	unknown	UNKNOWN,	rs117231086	0.0213658	.	0.0058	.	0.0337	0.0694	0.0005	0.0011	0.0002	.	.	.	.	.	.	D	T	0.0110	0.011	0.0014	0.0080	0.0827	0.0005	0.0006	0.0055	0.0284	0.01	D	0.998
chr12	109769179	109769179	G	A	exonic	FAM222A	.	nonsynonymous SNV	FAM222A:NM_032829:exon3:c.G1250A:p.R417Q,	exonic	FAM222A	.	nonsynonymous SNV	FAM222A:ENST00000358906.3:exon3:c.G1250A:p.R417Q	exonic	FAM222A	.	nonsynonymous SNV	FAM222A:ENST00000358906.3:exon3:c.G1250A:p.R417Q	rs200835101	0.000199681	0.0008	.	.	.	.	7.7e-05	0.0002	.	.	.	.	.	.	.	T	T	0.0001	0.0001	0.0005	0	0	0	8.768e-05	0	0.0002	1	T	0.876
chr12	110468915	110468915	G	C	exonic	FAM216A	.	nonsynonymous SNV	FAM216A:NM_013300:exon1:c.G40C:p.G14R,	exonic	ENST00000377673.9;FAM216A	.	nonsynonymous SNV	ENST00000377673.9:ENST00000377673.9:exon1:c.G40C:p.G14R	exonic	FAM216A	.	unknown	UNKNOWN,	rs368560327	0.00159744	.	.	0.001	0.0072	.	0.0005	0.0003	0.0007	.	.	.	.	.	.	D	T	0.0091	0.0091	0	0.0094	0	0	0.0044	0	0.0119	0.02	D	0.996
chr12	112170423	112170423	C	T	exonic	HECTD4	.	nonsynonymous SNV	HECTD4:NM_001109662:exon69:c.G11992A:p.V3998M,	exonic	HECTD4	.	nonsynonymous SNV	HECTD4:ENST00000377560.9:exon69:c.G11956A:p.V3986M	exonic	HECTD4	.	nonsynonymous SNV	HECTD4:ENST00000377560.9:exon69:c.G11956A:p.V3986M	rs186884971	0.000599042	.	.	0.003	.	.	0.0024	0.0007	0.0032	.	.	.	.	.	.	.	.	0.0014	0.0014	0.0005	0.0010	0.0002	0.0005	0.0023	0.0011	0	0.01	D	0.998
chr12	122959875	122959875	C	T	exonic	ABCB9	.	nonsynonymous SNV	ABCB9:NM_001243013:exon2:c.G361A:p.V121M	exonic	ABCB9;ENST00000280560.12	.	nonsynonymous SNV	ENST00000280560.12:ENST00000280560.12:exon2:c.G361A:p.V121M	exonic	ABCB9	.	nonsynonymous SNV	ABCB9:ENST00000344275.11:exon2:c.G361A:p.V121M	rs3803002	0.00379393	.	.	.	.	0.0188	.	.	.	.	.	.	.	.	.	D	D	0.0019	0.0019	0.0002	0.0018	0.0211	0	0.0002	0.0012	0.0002	0.15	T	0.966
chr12	123221798	123221798	G	A	exonic	MPHOSPH9	.	nonsynonymous SNV	MPHOSPH9:NM_022782:exon5:c.C446T:p.S149L,	exonic	ENST00000606320.5;MPHOSPH9	.	nonsynonymous SNV	MPHOSPH9:ENST00000302373.8:exon1:c.C50T:p.S17L	exonic	MPHOSPH9	.	nonsynonymous SNV	MPHOSPH9:ENST00000541076.6:exon3:c.C356T:p.S119L	rs201876941	.	.	.	.	.	.	0.0002	0.0002	0.0001	.	.	.	.	.	.	.	.	0.0004	0.0004	0	8.66e-05	0	0.0006	0.0006	0	0	0.88	T	.
chr12	123870407	123870407	C	T	exonic	DNAH10	.	nonsynonymous SNV	DNAH10:NM_207437:exon43:c.C7207T:p.R2403W,	exonic	DNAH10	.	nonsynonymous SNV	DNAH10:ENST00000409039.7:exon43:c.C7390T:p.R2464W	exonic	DNAH10	.	nonsynonymous SNV	DNAH10:ENST00000409039.7:exon43:c.C7390T:p.R2464W	rs7977449	0.0235623	0.0295	0.0086	0.007	0.0133	0.0526	0.0140	0.0291	0.0072	.	.	.	.	.	.	.	.	0.0126	0.0126	0.0298	0.0061	0.0601	0.0037	0.0067	0.0126	0.0099	0.02	D	0.952
chr12	123923849	123923849	C	A	exonic	DNAH10	.	nonsynonymous SNV	DNAH10:NM_207437:exon65:c.C11239A:p.L3747I,	exonic	DNAH10	.	nonsynonymous SNV	DNAH10:ENST00000409039.7:exon65:c.C11422A:p.L3808I	exonic	DNAH10	.	nonsynonymous SNV	DNAH10:ENST00000409039.7:exon65:c.C11422A:p.L3808I	rs764960821	.	.	.	.	.	.	.	.	.	.	.	.	.	.	.	T	T	2.725e-05	2.725e-05	0	0	0	0	4.906e-05	0	0	0.06	T	0.928
chr12	132147967	132147967	G	A	exonic	NOC4L	.	nonsynonymous SNV	NOC4L:NM_024078:exon6:c.G691A:p.V231M,	exonic	ENST00000330579.5;NOC4L	.	nonsynonymous SNV	ENST00000330579.5:ENST00000330579.5:exon6:c.G691A:p.V231M	exonic	NOC4L	.	unknown	UNKNOWN,	rs149306359	0.00119808	.	0.0014	0.004	0.001	.	0.0015	.	0.0022	.	.	.	.	.	.	D	T	0.0022	0.0022	0	0.0005	0	0.0084	0.0029	0.0030	0.0009	0.07	T	0.578
chr12	132572582	132572582	C	T	exonic	FBRSL1	.	nonsynonymous SNV	FBRSL1:NM_001142641:exon11:c.C1544T:p.P515L	exonic	FBRSL1	.	nonsynonymous SNV	FBRSL1:ENST00000434748.2:exon11:c.C1544T:p.P515L	exonic	FBRSL1	.	nonsynonymous SNV	FBRSL1:ENST00000434748.2:exon11:c.C1544T:p.P515L,	rs117416619	0.0199681	.	0.0029	0.0089	0.0061	0.0823	0.0068	0.0029	0.0085	.	.	.	.	.	.	D	T	0.0112	0.0112	0.0024	0.0075	0.0667	0.0108	0.0109	0.0185	0.0097	0.26	T	0.874
chr12	133121579	133121579	C	G	exonic	ZNF891	.	nonsynonymous SNV	ZNF891:NM_001277291:exon2:c.G340C:p.D114H,	exonic	ZNF891	.	nonsynonymous SNV	ZNF891:ENST00000537226.2:exon2:c.G340C:p.D114H,	exonic	ZNF891	.	nonsynonymous SNV	ZNF891:ENST00000537226.2:exon2:c.G340C:p.D114H,	rs148080897	0.000399361	.	0.0014	0.001	.	.	.	.	.	.	.	.	.	.	.	D	T	0.0027	0.0027	0	0	0	0.0025	0.0042	0.0053	0.0022	0.01	D	.
chr13	20189547	20189547	C	-	exonic	GJB2	.	frameshift deletion	GJB2:NM_004004:exon2:c.35delG:p.G12Vfs*2,	exonic	ENST00000645189.1;GJB2	.	frameshift deletion	GJB2:ENST00000382844.2:exon1:c.35delG:p.G12Vfs*2	exonic	GJB2	.	unknown	UNKNOWN,	rs80338939	0.00239617	.	0.0029	0.0089	0.001	.	0.0074	0.0009	0.0108	.	32043	Hearing_impairment|Bilateral_conductive_hearing_impairment|Bilateral_sensorineural_hearing_impairment|Severe_sensorineural_hearing_impairment|Inborn_genetic_diseases|Deafness|Keratitis-ichthyosis-deafness_syndrome,_autosomal_dominant|Mutilating_keratoderma|Knuckle_pads,_deafness_AND_leukonychia_syndrome|Keratoderma_palmoplantar_deafness|Hystrix-like_ichthyosis_with_deafness|Deafness,_autosomal_re…	Human_Phenotype_Ontology:HP:0000365,MedGen:C1384666|Human_Phenotype_Ontology:HP:0008513,MedGen:C0452136|Human_Phenotype_Ontology:HP:0008619,MedGen:C0452138|Human_Phenotype_Ontology:HP:0008625,MedGen:C4021533|MeSH:D030342,MedGen:C0950123|MedGen:C0011053|MedGen:C0265336,OMIM:148210|MedGen:C0265964,OMIM:124500,Orphanet:ORPHA494,SNOMED_CT:24559001|MedGen:C0266004,OMIM:149200,Orphanet:ORPHA2698,SNOMED…	reviewed_by_expert_panel	Pathogenic	.	.	0.0060	0.006	0.0013	0.0041	0	0.0103	0.0088	0.0088	0.0007	.	.	.
chr13	32237817	32237817	A	C	exonic	FRY	.	nonsynonymous SNV	FRY:NM_023037:exon44:c.A6249C:p.E2083D,	exonic	ENST00000542859.5;FRY	.	nonsynonymous SNV	ENST00000542859.5:ENST00000542859.5:exon44:c.A6249C:p.E2083D	exonic	FRY	.	nonsynonymous SNV	FRY:ENST00000542859.5:exon44:c.A6249C:p.E2083D	rs368086005	.	.	.	.	.	.	8.2e-05	.	0.0001	.	.	.	.	.	.	.	.	5.807e-05	5.807e-05	0	0	0	0	0.0001	0	0	0.72	T	0.917
chr13	35159173	35159173	G	A	exonic	NBEA	.	nonsynonymous SNV	NBEA:NM_015678:exon22:c.G3002A:p.R1001Q,	exonic	NBEA	.	nonsynonymous SNV	NBEA:ENST00000379939.6:exon22:c.G3002A:p.R1001Q	exonic	NBEA	.	nonsynonymous SNV	NBEA:ENST00000379939.6:exon22:c.G3002A:p.R1001Q	rs763957963	.	.	.	.	.	.	.	.	.	.	.	.	.	.	.	T	T	4.981e-05	4.981e-05	0	0	0	0	9.004e-05	0	0	0.58	T	0.804
chr13	42574383	42574383	A	G	exonic	TNFSF11	.	nonsynonymous SNV	TNFSF11:NM_003701:exon1:c.A80G:p.E27G,	exonic	ENST00000398795.6	.	nonsynonymous SNV	ENST00000398795.6:ENST00000398795.6:exon1:c.A80G:p.E27G,	exonic	TNFSF11	.	unknown	UNKNOWN,	rs200788562	0.00399361	.	0.0014	0.008	0.0112	.	0.0010	0.0003	0.0014	.	190420	not_specified	MedGen:CN169374	criteria_provided,_single_submitter	Benign	.	.	0.0130	0.013	0.0072	0.0088	0	0	0.0084	0	0.0171	0.03	D	0.455
chr13	51245330	51245330	G	A	exonic	FAM124A	.	nonsynonymous SNV	FAM124A:NM_145019:exon3:c.G119A:p.R40Q,	exonic	FAM124A	.	nonsynonymous SNV	FAM124A:ENST00000280057.6:exon3:c.G119A:p.R40Q,	exonic	FAM124A	.	nonsynonymous SNV	FAM124A:ENST00000280057.6:exon3:c.G119A:p.R40Q,	rs117053935	0.00319489	0.0015	.	0.001	.	0.0129	.	.	.	.	.	.	.	.	.	T	T	0.0012	0.0012	0.0006	0	0.0177	0	0.0005	0.0072	0.0012	0.31	T	0.893
chr13	51799600	51799601	CT	-	exonic	DHRS12	.	frameshift deletion	DHRS12:NM_001031719:exon2:c.59_60del:p.E20Vfs*33	exonic	DHRS12;ENST00000444610.6	.	frameshift deletion	DHRS12:ENST00000218981.5:exon2:c.59_60del:p.E20Vfs*33	exonic	DHRS12	.	frameshift deletion	DHRS12:ENST00000218981.5:exon2:c.59_60del:p.E20Vfs*33	rs770291566	.	.	.	.	.	.	.	.	.	.	.	.	.	.	.	.	.	4.944e-05	4.944e-05	0	0.0003	0.0002	0	0	0.0011	0	.	.	.
chr13	52475063	52475063	G	C	exonic	CKAP2	.	nonsynonymous SNV	CKAP2:NM_001098525:exon9:c.G1974C:p.L658F	exonic	CKAP2;ENST00000258607.9	.	nonsynonymous SNV	ENST00000258607.9:ENST00000258607.9:exon9:c.G1971C:p.L657F	exonic	CKAP2	.	nonsynonymous SNV	CKAP2:ENST00000378037.9:exon9:c.G1974C:p.L658F	rs34624748	0.000199681	.	.	0.001	.	.	0.0013	.	0.0020	.	.	.	.	.	.	D	T	0.0020	0.002	0.0002	0.0007	0	0.0021	0.0031	0.0022	0.0002	0.01	D	1.0
chr13	69975684	69975684	A	C	exonic	KLHL1	.	nonsynonymous SNV	KLHL1:NM_020866:exon2:c.T616G:p.L206V,	exonic	ENST00000377844.8	.	nonsynonymous SNV	ENST00000377844.8:ENST00000377844.8:exon2:c.T616G:p.L206V,	exonic	KLHL1	.	unknown	UNKNOWN,	rs748280993	.	.	.	.	.	.	.	.	.	.	.	.	.	.	.	T	T	7.416e-05	7.416e-05	0	8.639e-05	0	0	4.496e-05	0.0011	0.0002	0.16	T	0.756
chr13	77698132	77698132	-	GG	exonic	SLAIN1	.	frameshift insertion	SLAIN1:NM_001242868:exon1:c.219_220insGG:p.L75Afs*125,	exonic	ENST00000418532.5;SLAIN1	.	frameshift insertion	ENST00000418532.5:ENST00000418532.5:exon1:c.219_220insGG:p.L75Afs*125	exonic	SLAIN1	.	frameshift insertion	SLAIN1:ENST00000466548.5:exon1:c.219_220insGG:p.L75Afs*103,	rs201380414	.	.	.	.	.	.	.	.	.	.	702735	not_provided	MedGen:CN517202	criteria_provided,_single_submitter	Benign	.	.	0	0	.	.	.	.	.	.	.	.	.	.
chr13	77698141	77698141	-	C	exonic	SLAIN1	.	frameshift insertion	SLAIN1:NM_001242868:exon1:c.229dupC:p.L78Ffs*35,	exonic	ENST00000418532.5;SLAIN1	.	frameshift insertion	ENST00000418532.5:ENST00000418532.5:exon1:c.229dupC:p.L78Ffs*35	exonic	SLAIN1	.	frameshift insertion	SLAIN1:ENST00000466548.5:exon1:c.229dupC:p.L78Ffs*31,	rs542815284	1	1	1	1	1	1	.	.	.	.	702736	not_provided	MedGen:CN517202	criteria_provided,_single_submitter	Benign	.	.	0	0	.	.	.	.	.	.	.	.	.	.
chr13	110430425	110430425	G	T	exonic	COL4A2	.	nonsynonymous SNV	COL4A2:NM_001846:exon9:c.G574T:p.V192F,	exonic	COL4A2;ENST00000360467.6	.	nonsynonymous SNV	ENST00000360467.6:ENST00000360467.6:exon9:c.G574T:p.V192F	exonic	COL4A2	.	unknown	UNKNOWN,	rs62621885	0.00898562	0.0015	0.0346	0.004	0.0143	0.001	0.0057	0.0011	0.0077	.	333572	Porencephalic_cyst|not_provided	Human_Phenotype_Ontology:HP:0002132,MedGen:C4082172|MedGen:CN517202	criteria_provided,_multiple_submitters,_no_conflicts	Benign/Likely_benign	T	D	0.0095	0.0095	0.0024	0.0364	0.0002	0.0009	0.0061	0.0044	0.0170	0.04	D	0.846
chr13	113827041	113827041	A	C	exonic	GAS6	.	nonsynonymous SNV	GAS6:NM_000820:exon12:c.T1432G:p.S478A,	exonic	ENST00000327773.6	.	nonsynonymous SNV	ENST00000327773.6:ENST00000327773.6:exon12:c.T1432G:p.S478A,	exonic	GAS6	.	unknown	UNKNOWN,	rs199698744	0.000199681	.	.	.	.	0.001	.	.	.	.	.	.	.	.	.	T	T	3.325e-05	3.325e-05	0	0	0.0005	0	0	0	0	0.09	T	0.984
chr14	21569870	21569870	C	T	exonic	OR10G3	.	nonsynonymous SNV	OR10G3:NM_001005465:exon1:c.G875A:p.R292Q,	exonic	OR10G3	.	nonsynonymous SNV	OR10G3:ENST00000303532.1:exon1:c.G875A:p.R292Q	exonic	OR10G3	.	nonsynonymous SNV	OR10G3:ENST00000303532.1:exon1:c.G875A:p.R292Q,	rs80295194	0.0189696	.	.	0.001	0.0665	0.0288	0.0002	.	0.0003	.	.	.	.	.	.	D	T	0.0076	0.0076	0	0.0008	0.0269	0	0.0004	0.0044	0.0392	0	D	0.993
chr14	23042370	23042370	G	A	exonic	PSMB11	.	nonsynonymous SNV	PSMB11:NM_001099780:exon1:c.G145A:p.G49S,	exonic	ENST00000408907.3	.	nonsynonymous SNV	ENST00000408907.3:ENST00000408907.3:exon1:c.G145A:p.G49S,	exonic	PSMB11	.	unknown	UNKNOWN,	rs34457782	0.00838658	0.0008	0.0043	0.0099	0.002	0.0258	0.0044	0.0007	0.0062	.	702814	not_provided	MedGen:CN517202	criteria_provided,_single_submitter	Benign	D	T	0.0075	0.0075	0.0010	0.0034	0.0227	0.0116	0.0080	0.0100	0.0027	0	D	1.0
chr14	23103706	23103706	C	T	exonic	LMLN2	.	nonsynonymous SNV	LMLN2:NM_001354640:exon4:c.G572A:p.R191Q,	exonic	ENST00000637218.1;LMLN2	.	nonsynonymous SNV	ENST00000637218.1:ENST00000637218.1:exon4:c.G572A:p.R191Q	exonic	RP11-244E17.1	.	unknown	UNKNOWN,	rs112707515	0.00978435	0.0008	0.0115	0.0159	0.0215	0.003	.	.	.	.	.	.	.	.	.	.	.	0.0098	0.0098	0.0061	0.0183	0	.	0.0105	0.0154	0.0096	.	.	.
chr14	24099114	24099114	C	T	exonic	PCK2	.	nonsynonymous SNV	PCK2:NM_001018073:exon5:c.C730T:p.R244W	exonic	ENST00000216780.8;PCK2	.	nonsynonymous SNV	ENST00000216780.8:ENST00000216780.8:exon5:c.C730T:p.R244W	exonic	PCK2	.	nonsynonymous SNV	PCK2:ENST00000216780.8:exon5:c.C730T:p.R244W	rs75497728	0.00499201	.	0.0058	.	.	0.0208	0.0005	.	0.0007	ID=COSM249165,COSM4149604;OCCURENCE=2(kidney)	.	.	.	.	.	D	T	0.0021	0.0021	0.0002	0.0007	0.0216	0.0018	0.0006	0.0022	0.0004	0	D	1.0
chr14	24507429	24507429	C	G	exonic	CMA1	.	nonsynonymous SNV	CMA1:NM_001836:exon2:c.G136C:p.G46R,	exonic	CMA1	.	nonsynonymous SNV	CMA1:ENST00000250378.7:exon2:c.G136C:p.G46R,	exonic	CMA1	.	nonsynonymous SNV	CMA1:ENST00000250378.7:exon2:c.G136C:p.G46R,	rs5246	0.00279553	0.0008	0.0058	0.008	0.001	.	0.0043	0.0009	0.0060	.	725649	not_provided	MedGen:CN517202	criteria_provided,_single_submitter	Likely_benign	D	T	0.0045	0.0045	0.0010	0.0041	0	0.0085	0.0058	0.0077	0.0023	0.03	D	0.96
chr14	30622361	30622361	C	T	exonic	SCFD1	.	nonsynonymous SNV	SCFD1:NM_016106:exon1:c.C23T:p.T8I,	exonic	ENST00000458591.6;SCFD1	.	nonsynonymous SNV	SCFD1:ENST00000311943.11:exon1:c.C23T:p.T8I	exonic	SCFD1	.	nonsynonymous SNV	SCFD1:ENST00000458591.6:exon1:c.C23T:p.T8I,	rs535387543	0.000199681	.	.	.	.	0.001	.	.	.	.	.	.	.	.	.	T	T	0.0005	0.0005	0	0	0.0095	0	0	0	0.0003	0.06	T	.
chr14	37592342	37592342	G	C	exonic	FOXA1	.	nonsynonymous SNV	FOXA1:NM_004496:exon2:c.C442G:p.L148V,	exonic	ENST00000250448.2	.	nonsynonymous SNV	ENST00000250448.2:ENST00000250448.2:exon2:c.C442G:p.L148V,	exonic	FOXA1	.	unknown	UNKNOWN,	rs112819884	0.00519169	0.0015	0.0072	0.0159	0.0031	.	0.0138	0.0034	0.0192	.	.	.	.	.	.	D	T	0.0139	0.0139	0.0030	0.0027	0	0.0122	0.0222	0.0100	0.0033	0.05	D	0.552
chr14	37622558	37622558	G	A	exonic	TTC6	.	nonsynonymous SNV	TTC6:NM_001310135:exon3:c.G542A:p.G181E,	exonic	TTC6	.	nonsynonymous SNV	TTC6:ENST00000553443.5:exon1:c.G494A:p.G165E	exonic	TTC6	.	nonsynonymous SNV	TTC6:ENST00000553443.5:exon1:c.G494A:p.G165E,	rs117461973	0.00279553	.	.	.	0.001	0.0129	.	.	.	.	.	.	.	.	.	T	T	0.0007	0.0007	0	0.0109	0.0290	.	0	0	0.0004	.	.	.
chr14	37714723	37714723	G	A	exonic	TTC6	.	nonsynonymous SNV	TTC6:NM_001310135:exon8:c.G1688A:p.G563E,	exonic	TTC6	.	nonsynonymous SNV	TTC6:ENST00000553443.5:exon6:c.G1640A:p.G547E,	exonic	TTC6	.	nonsynonymous SNV	TTC6:ENST00000553443.5:exon6:c.G1640A:p.G547E,	rs78042024	0.00439297	.	.	.	0.0041	0.0179	.	.	.	.	.	.	.	.	.	T	T	0.0028	0.0028	0	0	0.0253	0	0.0028	0	0.0026	.	.	.
chr14	50911799	50911799	C	G	exonic	PYGL	.	nonsynonymous SNV	PYGL:NM_001163940:exon15:c.G1798C:p.D600H	exonic	ENST00000216392.7;PYGL	.	nonsynonymous SNV	PYGL:ENST00000544180.6:exon15:c.G1798C:p.D600H	exonic	PYGL	.	nonsynonymous SNV	PYGL:ENST00000544180.6:exon15:c.G1798C:p.D600H	rs35026927	0.00139776	.	0.0072	0.002	.	.	0.0045	0.0011	0.0063	ID=COSM3690101;OCCURENCE=1(large_intestine)	34183	Glycogen_storage_disease,_type_VI|not_specified|not_provided	MedGen:C0017925,OMIM:232700,Orphanet:ORPHA369,SNOMED_CT:237971004,SNOMED_CT:29291001|MedGen:CN169374|MedGen:CN517202	criteria_provided,_conflicting_interpretations	Conflicting_interpretations_of_pathogenicity	D	D	0.0035	0.0035	0.0018	0.0015	0	0.0021	0.0055	0.0022	0.0005	0	D	1.0
chr14	52010940	52010940	G	A	exonic	NID2	.	nonsynonymous SNV	NID2:NM_007361:exon18:c.C3658T:p.R1220C,	exonic	ENST00000216286.9;NID2	.	nonsynonymous SNV	NID2:ENST00000617139.4:exon14:c.C2440T:p.R814C	exonic	NID2	.	nonsynonymous SNV	NID2:ENST00000617139.4:exon14:c.C2440T:p.R814C,	rs554180806	.	.	.	.	.	.	.	.	.	.	.	.	.	.	.	D	D	8.236e-06	8.236e-06	0	0	0	0	1.498e-05	0	0	0	D	1.0
chr14	52053668	52053668	C	T	exonic	NID2	.	nonsynonymous SNV	NID2:NM_007361:exon5:c.G1340A:p.R447Q,	exonic	ENST00000216286.9	.	nonsynonymous SNV	ENST00000216286.9:ENST00000216286.9:exon5:c.G1340A:p.R447Q,	exonic	NID2	.	unknown	UNKNOWN,	rs201886389	0.000399361	.	.	.	.	0.002	.	.	.	ID=COSM1370088;OCCURENCE=1(large_intestine)	.	.	.	.	.	T	D	0.0003	0.0003	0	0	0.0044	0	0	0	6.056e-05	0.66	T	0.53
chr14	58365584	58365584	G	A	exonic	ARID4A	.	nonsynonymous SNV	ARID4A:NM_002892:exon21:c.G3278A:p.R1093Q	exonic	ARID4A;ENST00000355431.7	.	nonsynonymous SNV	ARID4A:ENST00000431317.6:exon20:c.G3278A:p.R1093Q	exonic	ARID4A	.	nonsynonymous SNV	ARID4A:ENST00000431317.6:exon20:c.G3278A:p.R1093Q	rs547522665	.	.	.	.	.	.	.	.	.	.	.	.	.	.	.	D	T	1.689e-05	1.689e-05	0	0	0.0001	0	1.539e-05	0	0	0.01	D	1.0
chr14	59985158	59985158	A	T	exonic	LRRC9	.	nonsynonymous SNV	LRRC9:NM_001355272:exon17:c.A2145T:p.L715F,	exonic	LRRC9	.	nonsynonymous SNV	LRRC9:ENST00000254271.8:exon17:c.A2145T:p.L715F	exonic	LRRC9	.	nonsynonymous SNV	LRRC9:ENST00000445360.5:exon17:c.A2145T:p.L715F,	rs77067896	0.00239617	.	.	.	0.002	0.0099	.	.	.	.	.	.	.	.	.	T	T	0.0013	0.0013	0	0	0.0051	0	0.0024	0.0056	0.0009	.	.	.
chr14	60149523	60149523	G	A	exonic	DHRS7	.	nonsynonymous SNV	DHRS7:NM_001322282:exon5:c.C562T:p.R188C	exonic	DHRS7;ENST00000557185.5;ENST00000611054.4	.	nonsynonymous SNV	DHRS7:ENST00000536410.6:exon6:c.C652T:p.R218C	exonic	DHRS7	.	nonsynonymous SNV	DHRS7:ENST00000536410.6:exon6:c.C652T:p.R218C	rs539765495	.	.	.	.	.	.	.	.	.	.	.	.	.	.	.	D	T	2.482e-05	2.482e-05	9.612e-05	0	0	0	3.004e-05	0	0	0.04	D	1.0
chr14	60466006	60466006	G	T	exonic	C14orf39	.	nonsynonymous SNV	C14orf39:NM_174978:exon11:c.C945A:p.D315E,	exonic	ENST00000321731.7	.	nonsynonymous SNV	ENST00000321731.7:ENST00000321731.7:exon11:c.C945A:p.D315E,	exonic	C14orf39	.	unknown	UNKNOWN,	rs181286257	0.00119808	.	.	.	.	0.006	.	.	.	.	.	.	.	.	.	D	T	0.0003	0.0003	0	0	0.0039	0	4.613e-05	0	0	0.45	T	0.994
chr14	62069668	62069668	C	A	exonic	SYT16	.	nonsynonymous SNV	SYT16:NM_001367652:exon3:c.C259A:p.Q87K	exonic	SYT16	.	nonsynonymous SNV	SYT16:ENST00000555409.1:exon2:c.C589A:p.Q197K	exonic	SYT16	.	nonsynonymous SNV	SYT16:ENST00000568344.5:exon2:c.C589A:p.Q197K,	rs372744803	.	.	.	.	.	.	8.2e-05	.	0.0001	.	.	.	.	.	.	.	.	2.484e-05	2.484e-05	0	0	0.0001	0	2.997e-05	0	0	0.32	T	0.944
chr14	64056029	64056029	C	G	exonic	SYNE2	.	nonsynonymous SNV	SYNE2:NM_015180:exon49:c.C9830G:p.A3277G	exonic	SYNE2	.	nonsynonymous SNV	SYNE2:ENST00000344113.8:exon49:c.C9830G:p.A3277G	exonic	SYNE2	.	nonsynonymous SNV	SYNE2:ENST00000344113.8:exon49:c.C9830G:p.A3277G	rs758226884	.	.	.	.	.	.	.	.	.	.	194775	not_provided	MedGen:CN517202	criteria_provided,_single_submitter	Uncertain_significance	T	T	2.485e-05	2.485e-05	0	0	0	0	2.999e-05	0	6.056e-05	0.26	T	0.72
chr14	64282960	64282960	C	A	exonic	ESR2	.	nonsynonymous SNV	ESR2:NM_001214902:exon1:c.G26T:p.S9I	exonic	ESR2	.	nonsynonymous SNV	ESR2:ENST00000267525.10:exon1:c.G26T:p.S9I	exonic	ESR2	.	nonsynonymous SNV	ESR2:ENST00000267525.10:exon1:c.G26T:p.S9I	rs771475824	.	.	.	.	.	.	.	.	.	.	.	.	.	.	.	T	D	1.663e-05	1.663e-05	0	0	0.0002	0	0	0	0	0.19	T	0.996
chr14	64786862	64786862	G	A	exonic	SPTB	.	nonsynonymous SNV	SPTB:NM_001024858:exon15:c.C3103T:p.R1035W	exonic	ENST00000389721.10;ENST00000556626.5;SPTB	.	nonsynonymous SNV	SPTB:ENST00000389722.7:exon15:c.C3103T:p.R1035W	exonic	SPTB	.	nonsynonymous SNV	SPTB:ENST00000389722.7:exon15:c.C3103T:p.R1035W,	rs143827332	0.00139776	.	.	.	.	0.0069	7.7e-05	.	0.0001	.	338500	Elliptocytosis|Spherocytosis,_Dominant	Human_Phenotype_Ontology:HP:0004445,MedGen:C0427480|MedGen:CN239455	criteria_provided,_single_submitter	Uncertain_significance	D	T	0.0004	0.0004	0	0	0.0056	0	4.527e-05	0.0022	6.058e-05	0	D	1.0
chr14	73492218	73492218	C	T	exonic	RIOX1	.	nonsynonymous SNV	RIOX1:NM_024644:exon1:c.C1201T:p.R401W,	exonic	ENST00000304061.7	.	nonsynonymous SNV	ENST00000304061.7:ENST00000304061.7:exon1:c.C1201T:p.R401W,	exonic	RIOX1	.	nonsynonymous SNV	RIOX1:ENST00000304061.7:exon1:c.C1201T:p.R401W,	rs749992591	.	.	.	.	.	.	.	.	.	.	.	.	.	.	.	.	.	1.656e-05	1.656e-05	0	0	0	0	2.997e-05	0	0	.	.	.
chr14	75046831	75046831	G	A	exonic	MLH3	.	nonsynonymous SNV	MLH3:NM_001040108:exon2:c.C2825T:p.T942I	exonic	MLH3	.	nonsynonymous SNV	MLH3:ENST00000556740.5:exon1:c.C2825T:p.T942I	exonic	MLH3	.	nonsynonymous SNV	MLH3:ENST00000556740.5:exon1:c.C2825T:p.T942I	rs17102999	0.01877	.	0.0605	0.002	0.002	0.0476	0.0011	0.0014	0.0009	.	339201	Lynch_syndrome|not_specified|not_provided	MedGen:C1333990,Orphanet:ORPHA144|MedGen:CN169374|MedGen:CN517202	criteria_provided,_multiple_submitters,_no_conflicts	Benign/Likely_benign	T	T	0.0099	0.0099	0.0014	0.0426	0.0517	0.0144	0.0015	0.0132	0.0025	0.37	T	0.465
chr14	81506097	81506097	T	C	exonic	SEL1L	.	nonsynonymous SNV	SEL1L:NM_001244984:exon4:c.A485G:p.D162G	exonic	ENST00000336735.8;SEL1L	.	nonsynonymous SNV	ENST00000336735.8:ENST00000336735.8:exon4:c.A485G:p.D162G	exonic	SEL1L	.	nonsynonymous SNV	SEL1L:ENST00000555824.5:exon4:c.A485G:p.D162G,	rs11499034	0.00758786	0.0015	0.0144	0.0209	0.0051	.	0.0108	0.0036	0.0144	.	.	.	.	.	.	D	T	0.0106	0.0106	0.0028	0.0079	0	0.0135	0.0147	0.0220	0.0044	0.68	T	1.0
chr14	88596758	88596758	C	T	exonic	ZC3H14	.	nonsynonymous SNV	ZC3H14:NM_207662:exon2:c.C410T:p.S137F	exonic	ENST00000251038.9;ZC3H14	.	nonsynonymous SNV	ZC3H14:ENST00000318308.10:exon2:c.C410T:p.S137F	exonic	ZC3H14	.	nonsynonymous SNV	ZC3H14:ENST00000318308.10:exon2:c.C410T:p.S137F	rs45518831	0.00159744	.	0.0029	0.005	0.001	.	0.0030	0.0007	0.0042	.	208135	not_specified|not_provided	MedGen:CN169374|MedGen:CN517202	criteria_provided,_multiple_submitters,_no_conflicts	Benign/Likely_benign	D	.	0.0044	0.0044	0.0003	0.0003	0	0.0166	0.0057	0.0121	0.0015	0.01	D	1.0
chr14	90289120	90289120	T	C	exonic	NRDE2	.	nonsynonymous SNV	NRDE2:NM_017970:exon11:c.A2255G:p.N752S,	exonic	ENST00000354366.7	.	nonsynonymous SNV	ENST00000354366.7:ENST00000354366.7:exon11:c.A2255G:p.N752S,	exonic	NRDE2	.	unknown	UNKNOWN,	rs778657185	.	.	.	.	.	.	.	.	.	.	.	.	.	.	.	T	T	8.35e-06	8.35e-06	0	0	0	0	1.518e-05	0	0	0.45	T	0.506
chr14	92004372	92004372	T	G	exonic	TRIP11	.	nonsynonymous SNV	TRIP11:NM_001321851:exon11:c.A3601C:p.N1201H	exonic	TRIP11	.	nonsynonymous SNV	TRIP11:ENST00000267622.8:exon11:c.A3604C:p.N1202H,	exonic	TRIP11	.	nonsynonymous SNV	TRIP11:ENST00000267622.8:exon11:c.A3604C:p.N1202H,	rs41301481	0.000798722	.	0.0014	0.003	.	.	0.0026	0.0005	0.0037	.	275002	Achondrogenesis|not_specified|not_provided	MedGen:C0001079,Orphanet:ORPHA932|MedGen:CN169374|MedGen:CN517202	criteria_provided,_conflicting_interpretations	Conflicting_interpretations_of_pathogenicity	D	T	0.0018	0.0018	0.0008	0.0016	0.0001	0.0002	0.0027	0.0022	0.0005	0.08	T	1.0
chr14	93939473	93939473	C	T	exonic	ASB2	.	nonsynonymous SNV	ASB2:NM_016150:exon6:c.G1108A:p.A370T	exonic	ASB2;ENST00000555019.5	.	nonsynonymous SNV	ASB2:ENST00000315988.8:exon6:c.G1108A:p.A370T	exonic	ASB2	.	nonsynonymous SNV	ASB2:ENST00000315988.8:exon6:c.G1108A:p.A370T	rs200512221	0.000998403	.	.	.	.	0.005	.	.	.	.	.	.	.	.	.	D	T	0.0004	0.0004	0	0	0.0051	0	0	0	0	0.01	D	0.998
chr14	93954390	93954390	G	T	exonic	ASB2	.	nonsynonymous SNV	ASB2:NM_016150:exon2:c.C261A:p.N87K	exonic	ASB2;ENST00000555019.5	.	nonsynonymous SNV	ASB2:ENST00000315988.8:exon2:c.C261A:p.N87K	exonic	ASB2	.	nonsynonymous SNV	ASB2:ENST00000315988.8:exon2:c.C261A:p.N87K	rs367755389	.	.	.	.	.	.	.	.	.	.	.	.	.	.	.	D	T	8.244e-06	8.244e-06	0	0	0	0	1.5e-05	0	0	0.05	D	1.0
chr14	94004867	94004867	G	A	exonic	CCDC197	.	nonsynonymous SNV	CCDC197:NM_001351596:exon6:c.G511A:p.G171S,	exonic	CCDC197;ENST00000636493.1	.	nonsynonymous SNV	ENST00000636493.1:ENST00000636493.1:exon6:c.G511A:p.G171S	exonic	LINC00521	.	nonsynonymous SNV	LINC00521:ENST00000636493.1:exon6:c.G511A:p.G171S	rs77889679	0.0285543	0.0779	0.0288	0.0189	0.001	.	.	.	.	.	.	.	.	.	.	.	.	0.0134	0.0134	0.0684	0.0326	0	0	0.0220	0.0227	0.0049	.	.	.
chr14	103679507	103679507	G	A	exonic	KLC1	.	nonsynonymous SNV	KLC1:NM_001130107:exon13:c.G1612A:p.G538R	exonic	AL139300.1;KLC1	.	nonsynonymous SNV	KLC1:ENST00000246489.11:exon13:c.G1612A:p.G538R	exonic	KLC1;RP11-73M18.2	.	nonsynonymous SNV	KLC1:ENST00000246489.11:exon13:c.G1612A:p.G538R	rs781648741	.	.	.	.	.	.	.	.	.	.	.	.	.	.	.	D	D	8.268e-06	8.268e-06	0	0	0	0	1.504e-05	0	0	0	D	1.0
chr14	104106868	104106868	G	C	exonic	ASPG	.	nonsynonymous SNV	ASPG:NM_001080464:exon11:c.G1243C:p.E415Q,	exonic	ASPG;ENST00000551177.5	.	nonsynonymous SNV	ASPG:ENST00000546892.6:exon11:c.G1243C:p.E415Q	exonic	ASPG	.	nonsynonymous SNV	ASPG:ENST00000546892.6:exon11:c.G1243C:p.E415Q,	rs373995703	.	.	.	.	.	.	8e-05	.	0.0001	.	.	.	.	.	.	T	T	0.0004	0.0004	0	0	0	0.0048	0.0005	0.0035	0	0.49	T	0.798
chr14	104157891	104157891	G	T	exonic	KIF26A	.	nonsynonymous SNV	KIF26A:NM_015656:exon4:c.G872T:p.G291V,	exonic	KIF26A	.	nonsynonymous SNV	KIF26A:ENST00000315264.7:exon3:c.G455T:p.G152V	exonic	KIF26A	.	nonsynonymous SNV	KIF26A:ENST00000315264.7:exon3:c.G455T:p.G152V	rs201571218	0.000599042	.	.	.	.	0.003	.	.	.	.	.	.	.	.	.	T	T	0.0003	0.0003	0	0	0.0032	0	0	0	0	0.14	T	0.889
chr14	105497363	105497363	C	T	exonic	TEDC1	.	nonsynonymous SNV	TEDC1:NM_001134876:exon5:c.C592T:p.R198W	exonic	TEDC1	.	nonsynonymous SNV	TEDC1:ENST00000334656.11:exon5:c.C157T:p.R53W	exonic	C14orf80	.	nonsynonymous SNV	C14orf80:ENST00000334656.11:exon5:c.C157T:p.R53W	rs80142487	0.0141773	.	0.0101	0.003	0.0061	0.0546	0.0006	0.0009	0.0005	.	.	.	.	.	.	D	.	0.0052	0.0052	0.0007	0.0121	0.0772	0.0263	0.0009	0	0.0047	0.01	D	0.999
chr14	105498831	105498831	A	G	exonic	TEDC1	.	nonsynonymous SNV	TEDC1:NM_001134876:exon7:c.A1067G:p.Q356R	exonic	TEDC1	.	nonsynonymous SNV	TEDC1:ENST00000334656.11:exon7:c.A632G:p.Q211R	exonic	C14orf80	.	nonsynonymous SNV	C14orf80:ENST00000334656.11:exon7:c.A632G:p.Q211R	rs142782649	0.000798722	.	0.0029	.	0.002	.	0.0003	.	0.0005	.	.	.	.	.	.	T	.	0.0006	0.0006	0	0.0014	0	0	0.0007	0	0.0009	1	T	0.75
chr15	27983407	27983407	C	T	exonic	OCA2	.	nonsynonymous SNV	OCA2:NM_001300984:exon13:c.G1369A:p.A457T	exonic	ENST00000354638.7;OCA2	.	nonsynonymous SNV	OCA2:ENST00000353809.9:exon13:c.G1369A:p.A457T	exonic	OCA2	.	nonsynonymous SNV	OCA2:ENST00000353809.9:exon13:c.G1369A:p.A457T,	rs74653330	0.00798722	.	0.0043	0.0099	.	0.0268	0.0013	.	0.0020	.	15993	Tyrosinase-positive_oculocutaneous_albinism|not_specified|not_provided	MedGen:C0268495,OMIM:203200,Orphanet:ORPHA79432,SNOMED_CT:26336006|MedGen:CN169374|MedGen:CN517202	criteria_provided,_conflicting_interpretations	Conflicting_interpretations_of_pathogenicity	T	D	0.0078	0.0078	9.61e-05	0.0016	0.0303	0.0473	0.0047	0.0176	0.0009	0.32	T	0.946
chr15	29054038	29054038	C	T	exonic	APBA2	.	nonsynonymous SNV	APBA2:NM_001130414:exon3:c.C154T:p.R52W	exonic	APBA2	.	nonsynonymous SNV	APBA2:ENST00000558358.1:exon2:c.C154T:p.R52W	exonic	APBA2	.	nonsynonymous SNV	APBA2:ENST00000411764.5:exon3:c.C154T:p.R52W	rs575379564	.	.	.	.	.	.	.	.	.	.	.	.	.	.	.	D	T	4.132e-05	4.132e-05	0	0	0.0001	0	1.504e-05	0	0.0002	0	D	0.987
chr15	30920573	30920573	C	T	exonic	FAN1	.	nonsynonymous SNV	FAN1:NM_014967:exon7:c.C1972T:p.R658W,	exonic	ENST00000362065.8	.	nonsynonymous SNV	ENST00000362065.8:ENST00000362065.8:exon7:c.C1972T:p.R658W,	exonic	FAN1	.	unknown	UNKNOWN,	rs140501687	.	.	.	.	.	.	0.0002	.	0.0003	.	.	.	.	.	.	D	T	5.766e-05	5.766e-05	0	0	0	0	8.991e-05	0	6.057e-05	0	D	1.0
chr15	32968772	32968772	C	T	exonic	FMN1	.	nonsynonymous SNV	FMN1:NM_001103184:exon4:c.G2260A:p.E754K	exonic	FMN1	.	nonsynonymous SNV	FMN1:ENST00000561249.5:exon3:c.G2635A:p.E879K	exonic	FMN1	.	nonsynonymous SNV	FMN1:ENST00000561249.5:exon3:c.G2635A:p.E879K	rs150962800	0.00778754	0.0008	0.0173	0.0189	0.0061	0.001	0.0167	0.0038	0.0225	.	271484	not_specified	MedGen:CN169374	criteria_provided,_single_submitter	Benign	T	T	0.0133	0.0133	0.0038	0.0067	0	0.0147	0.0191	0.0067	0.0073	0.12	T	0.997
chr15	40458618	40458618	C	T	exonic	BAHD1	.	nonsynonymous SNV	BAHD1:NM_001301132:exon2:c.C154T:p.R52C	exonic	BAHD1;ENST00000416165.5	.	nonsynonymous SNV	BAHD1:ENST00000560846.1:exon1:c.C154T:p.R52C	exonic	BAHD1	.	nonsynonymous SNV	BAHD1:ENST00000560846.1:exon1:c.C154T:p.R52C	rs144910683	.	.	.	.	.	.	.	.	.	ID=COSM3401705;OCCURENCE=1(central_nervous_system)	.	.	.	.	.	D	T	9.911e-05	9.911e-05	0	0	0	0.0009	7.516e-05	0.0011	0	0	D	1.0
chr15	41511263	41511263	A	T	exonic	LTK	.	nonsynonymous SNV	LTK:NM_002344:exon7:c.T898A:p.C300S,	exonic	ENST00000263800.10	.	nonsynonymous SNV	ENST00000263800.10:ENST00000263800.10:exon7:c.T898A:p.C300S,	exonic	LTK	.	unknown	UNKNOWN,	rs781404572	.	.	.	.	.	.	.	.	.	.	.	.	.	.	.	T	T	0	0	0	0	0	0	0	0	0	0	D	0.988
chr15	42087416	42087416	C	T	exonic	PLA2G4D	.	nonsynonymous SNV	PLA2G4D:NM_178034:exon3:c.G139A:p.V47M,	exonic	ENST00000290472.3	.	nonsynonymous SNV	ENST00000290472.3:ENST00000290472.3:exon3:c.G139A:p.V47M,	exonic	PLA2G4D	.	nonsynonymous SNV	PLA2G4D:ENST00000290472.3:exon3:c.G139A:p.V47M,	rs780737448	.	.	.	.	.	.	.	.	.	.	.	.	.	.	.	D	T	1.647e-05	1.647e-05	0	0	0.0001	0	0	0	6.056e-05	0	D	0.998
chr15	43260174	43260174	C	T	exonic	TGM5	.	nonsynonymous SNV	TGM5:NM_201631:exon3:c.G314A:p.C105Y,	exonic	ENST00000220420.9;TGM5	.	nonsynonymous SNV	ENST00000220420.9:ENST00000220420.9:exon3:c.G314A:p.C105Y	exonic	TGM5	.	nonsynonymous SNV	TGM5:ENST00000220420.9:exon3:c.G314A:p.C105Y	rs116753155	0.00738818	.	.	.	0.002	0.0347	.	.	.	ID=COSM1578745;OCCURENCE=1(meninges)	141341	Peeling_skin_syndrome_1|not_provided	MedGen:C1849193,OMIM:270300,Orphanet:ORPHA263553|MedGen:CN517202	criteria_provided,_multiple_submitters,_no_conflicts	Benign/Likely_benign	T	D	0.0031	0.0031	9.677e-05	8.645e-05	0.0387	0	0.0002	0	0.0018	1	T	0.905
chr15	43276899	43276899	C	T	exonic	TGM7	.	nonsynonymous SNV	TGM7:NM_052955:exon12:c.G1936A:p.E646K,	exonic	ENST00000452443.2	.	nonsynonymous SNV	ENST00000452443.2:ENST00000452443.2:exon12:c.G1936A:p.E646K,	exonic	TGM7	.	nonsynonymous SNV	TGM7:ENST00000452443.2:exon12:c.G1936A:p.E646K,	rs146833656	0.00239617	0.0008	0.0086	0.004	0.001	.	0.0092	0.0034	0.0121	.	.	.	.	.	.	D	T	0.0081	0.0081	0.0024	0.0046	0.0001	0.0114	0.0110	0.0122	0.0050	0.01	D	0.996
chr15	43525917	43525917	G	A	exonic	MAP1A	.	nonsynonymous SNV	MAP1A:NM_002373:exon4:c.G4444A:p.D1482N,	exonic	ENST00000300231.5;MAP1A	.	nonsynonymous SNV	ENST00000300231.5:ENST00000300231.5:exon4:c.G4444A:p.D1482N	exonic	MAP1A	.	nonsynonymous SNV	MAP1A:ENST00000382031.5:exon5:c.G5158A:p.D1720N,	rs145659671	0.00219649	0.0008	0.0086	0.003	0.001	.	0.0115	0.0037	0.0151	ID=COSM328351;OCCURENCE=1(pancreas)	.	.	.	.	.	D	T	0.0095	0.0095	0.0030	0.0052	0.0001	0.0113	0.0132	0.0146	0.0051	0.05	D	0.996
chr15	43892008	43892008	C	G	exonic	FRMD5	.	nonsynonymous SNV	FRMD5:NM_001322951:exon7:c.G596C:p.G199A	exonic	ENST00000417257.5;FRMD5	.	nonsynonymous SNV	FRMD5:ENST00000558108.6:exon5:c.G416C:p.G139A	exonic	FRMD5	.	nonsynonymous SNV	FRMD5:ENST00000402883.5:exon8:c.G701C:p.G234A	rs771568540	.	.	.	.	.	.	.	.	.	.	.	.	.	.	.	D	D	3.322e-05	3.322e-05	0	0	0.0005	0	0	0	0	0.01	D	1.0
chr15	48178149	48178149	C	A	exonic	MYEF2	.	nonsynonymous SNV	MYEF2:NM_001301210:exon1:c.G89T:p.R30L	exonic	ENST00000324324.11;MYEF2	.	nonsynonymous SNV	MYEF2:ENST00000267836.10:exon1:c.G89T:p.R30L	exonic	MYEF2	.	nonsynonymous SNV	MYEF2:ENST00000267836.10:exon1:c.G89T:p.R30L	rs533005749	0.000399361	.	.	.	.	0.002	.	.	.	ID=COSM1189001;OCCURENCE=1(lung)	.	.	.	.	.	D	T	0.0007	0.0007	0	0	0.0112	0	0	0	0.0001	0.02	D	0.687
chr15	61963849	61963849	T	G	exonic	VPS13C	.	nonsynonymous SNV	VPS13C:NM_017684:exon30:c.A3188C:p.E1063A	exonic	ENST00000261517.9;ENST00000395896.8;VPS13C	.	nonsynonymous SNV	VPS13C:ENST00000249837.7:exon30:c.A3188C:p.E1063A	exonic	VPS13C	.	nonsynonymous SNV	VPS13C:ENST00000249837.7:exon30:c.A3188C:p.E1063A	rs139254530	.	.	.	.	.	.	7.7e-05	.	0.0001	.	.	.	.	.	.	D	T	4.135e-05	4.135e-05	0	0	0	0	7.518e-05	0	0	0.32	T	0.962
chr15	64864929	64864929	C	T	exonic	PLEKHO2	.	nonsynonymous SNV	PLEKHO2:NM_001195059:exon5:c.C364T:p.R122C	exonic	ENST00000323544.4;PLEKHO2	.	nonsynonymous SNV	PLEKHO2:ENST00000616065.4:exon5:c.C364T:p.R122C	exonic	PLEKHO2	.	nonsynonymous SNV	PLEKHO2:ENST00000616065.4:exon5:c.C364T:p.R122C,	rs753620849	.	.	.	.	.	.	.	.	.	ID=COSM1717585;OCCURENCE=1(haematopoietic_and_lymphoid_tissue)	.	.	.	.	.	D	T	8.437e-06	8.437e-06	0	0	0	0	1.521e-05	0	0	0.01	D	1.0
chr15	66703620	66703620	G	A	exonic	SMAD6	.	nonsynonymous SNV	SMAD6:NM_005585:exon1:c.G362A:p.C121Y,	exonic	ENST00000288840.9;SMAD6	.	nonsynonymous SNV	ENST00000288840.9:ENST00000288840.9:exon1:c.G362A:p.C121Y	exonic	SMAD6	.	unknown	UNKNOWN,	rs80232004	0.00439297	.	0.0058	.	.	0.0179	.	.	.	.	429714	Loeys-Dietz_syndrome_3|not_specified	MedGen:C3151087,OMIM:613795,Orphanet:ORPHA284984|MedGen:CN169374	criteria_provided,_conflicting_interpretations	Conflicting_interpretations_of_pathogenicity	D	T	0.0110	0.011	0	0.125	0.0256	0	0	0	0	0.03	D	0.976
chr15	67827179	67827179	G	A	exonic	SKOR1	.	nonsynonymous SNV	SKOR1:NM_001365915:exon2:c.G1351A:p.G451R,	exonic	ENST00000380035.2;SKOR1	.	nonsynonymous SNV	ENST00000380035.2:ENST00000380035.2:exon2:c.G1351A:p.G451R	exonic	SKOR1	.	nonsynonymous SNV	SKOR1:ENST00000380035.2:exon2:c.G1351A:p.G451R	rs371006898	0.000199681	.	.	.	.	0.001	.	.	.	.	.	.	.	.	.	D	T	0.0006	0.0006	0	0	0.0069	0	0	0	0	0.02	D	0.991
chr15	72165373	72165373	G	C	exonic	GRAMD2A	.	stopgain	GRAMD2A:NM_001012642:exon8:c.C581G:p.S194X,	exonic	ENST00000309731.11;GRAMD2A	.	stopgain	ENST00000309731.11:ENST00000309731.11:exon8:c.C581G:p.S194X	exonic	GRAMD2	.	unknown	UNKNOWN,	rs201316363	0.000399361	.	.	.	.	0.002	.	.	.	.	.	.	.	.	.	.	.	0.0001	0.0001	0	8.66e-05	0.0014	0	4.506e-05	0	6.067e-05	0.41	T	.
chr15	72676097	72676097	A	G	exonic	HIGD2B	.	nonsynonymous SNV	HIGD2B:NM_001350932:exon3:c.T278C:p.I93T,	exonic	ENST00000311755.4	.	nonsynonymous SNV	ENST00000311755.4:ENST00000311755.4:exon3:c.T278C:p.I93T,	exonic	HIGD2B	.	unknown	UNKNOWN,	rs76177858	0.00119808	.	.	0.002	.	0.004	.	.	.	.	.	.	.	.	.	T	.	0.0025	0.0025	0	0.0002	0.0030	0.0096	0.0032	0.0018	0	0.08	T	.
chr15	74023144	74023144	C	T	exonic	PML	.	nonsynonymous SNV	PML:NM_002675:exon3:c.C919T:p.R307C	exonic	ENST00000268058.7;PML	.	nonsynonymous SNV	ENST00000268058.7:ENST00000268058.7:exon3:c.C919T:p.R307C	exonic	PML	.	nonsynonymous SNV	PML:ENST00000268058.7:exon3:c.C919T:p.R307C	rs140050477	0.000599042	.	0.0014	0.002	.	.	0.0010	0.0005	0.0013	.	.	.	.	.	.	D	T	0.0009	0.0009	0.0004	0.0004	0	0.0009	0.0015	0.0025	0	0	D	1.0
chr15	74722964	74722964	C	T	exonic	CYP1A1	.	nonsynonymous SNV	CYP1A1:NM_000499:exon2:c.G134A:p.G45D	exonic	CYP1A1;ENST00000379727.7	.	nonsynonymous SNV	CYP1A1:ENST00000612821.4:exon1:c.G134A:p.G45D	exonic	CYP1A1	.	nonsynonymous SNV	CYP1A1:ENST00000612821.4:exon1:c.G134A:p.G45D	rs4646422	0.0241613	.	.	.	0.0051	0.1151	0.0002	0.0005	.	.	.	.	.	.	.	D	T	0.0104	0.0104	0.0002	0.0002	0.1409	0	1.502e-05	0.0067	0.0019	0.08	T	0.851
chr15	77115174	77115174	G	T	exonic	PEAK1	.	nonsynonymous SNV	PEAK1:NM_024776:exon8:c.C4223A:p.P1408Q,	exonic	PEAK1	.	nonsynonymous SNV	PEAK1:ENST00000312493.5:exon5:c.C4223A:p.P1408Q	exonic	PEAK1	.	nonsynonymous SNV	PEAK1:ENST00000312493.5:exon5:c.C4223A:p.P1408Q	rs56079860	0.0277556	0.0802	0.0043	0.002	0.0041	0.0238	0.0219	0.0671	0.0008	.	.	.	.	.	.	D	T	0.0101	0.0101	0.0736	0.0045	0.0373	0	0.0005	0.01	0.0053	0.03	D	0.744
chr15	78490677	78490677	G	A	exonic	IREB2	.	nonsynonymous SNV	IREB2:NM_001320941:exon17:c.G1490A:p.G497E	exonic	ENST00000258886.12	.	nonsynonymous SNV	ENST00000258886.12:ENST00000258886.12:exon18:c.G2240A:p.G747E,	exonic	IREB2	.	unknown	UNKNOWN,	rs139092247	0.00139776	0.0008	0.0029	0.002	0.002	.	0.0023	0.0002	0.0034	.	.	.	.	.	.	D	T	0.0024	0.0024	0.0006	0.0016	0	0.0006	0.0034	0.0022	0.0018	0	D	1.0
chr15	83983044	83983044	G	A	exonic	ADAMTSL3	.	nonsynonymous SNV	ADAMTSL3:NM_001301110:exon21:c.G3416A:p.R1139Q	exonic	ADAMTSL3;ENST00000286744.9	.	nonsynonymous SNV	ENST00000286744.9:ENST00000286744.9:exon21:c.G3416A:p.R1139Q	exonic	ADAMTSL3	.	nonsynonymous SNV	ADAMTSL3:ENST00000567476.1:exon21:c.G3416A:p.R1139Q,	rs148037443	0.00299521	.	.	0.001	0.001	0.0129	.	.	.	ID=COSM1375042;OCCURENCE=1(large_intestine)	.	.	.	.	.	T	T	0.0010	0.001	0	0	0.0125	0.0002	4.507e-05	0	0.0004	0.11	T	0.76
chr15	86295306	86295306	C	T	exonic	AGBL1	.	nonsynonymous SNV	AGBL1:NM_152336:exon17:c.C2272T:p.R758W,	exonic	AGBL1;ENST00000635782.1	.	nonsynonymous SNV	ENST00000635782.1:ENST00000635782.1:exon15:c.C2134T:p.R712W	exonic	AGBL1	.	nonsynonymous SNV	AGBL1:ENST00000441037.7:exon17:c.C2272T:p.R758W,	rs545196930	0.000199681	.	.	.	0.001	.	.	.	.	ID=COSM3690677,COSM3690676;OCCURENCE=1(large_intestine)	.	.	.	.	.	.	.	0.0001	0.0001	0.0001	8.728e-05	0	0	6.018e-05	0.0034	0.0004	0	D	1.0
chr15	88881597	88881597	G	A	exonic	HAPLN3	.	nonsynonymous SNV	HAPLN3:NM_178232:exon3:c.C253T:p.R85C	exonic	HAPLN3	.	nonsynonymous SNV	HAPLN3:ENST00000359595.7:exon3:c.C253T:p.R85C	exonic	HAPLN3	.	nonsynonymous SNV	HAPLN3:ENST00000359595.7:exon3:c.C253T:p.R85C	rs142254313	0.000399361	.	.	.	0.001	0.001	0.0002	.	0.0002	.	.	.	.	.	.	D	T	0.0004	0.0004	0	0	0.0042	0	0.0002	0	6.062e-05	0	D	1.0
chr15	89291615	89291615	A	C	exonic	FANCI	.	nonsynonymous SNV	FANCI:NM_001113378:exon20:c.A1893C:p.L631F	exonic	FANCI	.	nonsynonymous SNV	FANCI:ENST00000300027.12:exon20:c.A1893C:p.L631F	exonic	FANCI	.	nonsynonymous SNV	FANCI:ENST00000300027.12:exon20:c.A1893C:p.L631F	rs118138806	0.00359425	.	.	.	.	0.0179	.	.	.	.	363821	not_provided	MedGen:CN517202	criteria_provided,_multiple_submitters,_no_conflicts	Benign/Likely_benign	T	T	0.0016	0.0016	0	0	0.0225	0	0	0	0.0001	0.41	T	0.499
chr16	576237	576237	C	G	exonic	PIGQ	.	nonsynonymous SNV	PIGQ:NM_004204:exon4:c.C925G:p.L309V	exonic	PIGQ	.	nonsynonymous SNV	PIGQ:ENST00000026218.9:exon4:c.C925G:p.L309V	exonic	PIGQ	.	nonsynonymous SNV	PIGQ:ENST00000026218.9:exon4:c.C925G:p.L309V	rs145216283	0.000399361	.	.	0.002	.	.	0.0012	0.0007	0.0014	.	530194	not_provided	MedGen:CN517202	criteria_provided,_single_submitter	Likely_benign	D	T	0.0018	0.0018	0.0016	0	0	0	0.0033	0	0.0008	0.13	T	0.831
chr16	790628	790628	T	C	exonic	CHTF18	.	nonsynonymous SNV	CHTF18:NM_022092:exon7:c.T856C:p.F286L,	exonic	CHTF18;ENST00000262315.13	.	nonsynonymous SNV	CHTF18:ENST00000455171.6:exon6:c.T940C:p.F314L	exonic	CHTF18	.	nonsynonymous SNV	CHTF18:ENST00000455171.6:exon6:c.T940C:p.F314L	rs61753373	0.00299521	.	0.0072	0.0089	0.001	.	0.0089	0.0022	0.0122	.	.	.	.	.	.	D	T	0.0140	0.014	0.0031	0.0057	0	0.0316	0.0199	0.0093	0.0014	0.01	D	0.749
chr16	1772641	1772641	C	G	exonic	MRPS34	.	nonsynonymous SNV	MRPS34:NM_001300900:exon2:c.G327C:p.L109F	exonic	MRPS34	.	nonsynonymous SNV	MRPS34:ENST00000177742.7:exon2:c.G327C:p.L109F	exonic	MRPS34	.	nonsynonymous SNV	MRPS34:ENST00000177742.7:exon2:c.G327C:p.L109F	rs11552434	0.0123802	0.0008	0.0043	0.0159	0.0429	.	0.0103	0.0030	0.0141	.	.	.	.	.	.	D	T	0.0143	0.0143	0.0028	0.0058	0	0.0096	0.0147	0.0146	0.0335	0.23	T	0.98
chr16	1775981	1775981	C	T	exonic	EME2	.	stopgain	EME2:NM_001257370:exon7:c.C964T:p.Q322X,	exonic	EME2;ENST00000568449.5	.	stopgain	ENST00000568449.5:ENST00000568449.5:exon7:c.C964T:p.Q322X,	exonic	EME2	.	stopgain	EME2:ENST00000568449.5:exon7:c.C964T:p.Q322X,	rs61753375	0.00379393	.	0.0043	0.0159	.	.	0.0110	0.0037	0.0147	.	703531	not_provided	MedGen:CN517202	criteria_provided,_single_submitter	Benign	.	.	0.0085	0.0085	0.0022	0.0070	0	0.0046	0.0134	0.0051	0.0009	0.07	T	.
chr16	1809439	1809439	C	A	exonic	HAGH	.	nonsynonymous SNV	HAGH:NM_001363912:exon9:c.G835T:p.G279C	exonic	HAGH	.	nonsynonymous SNV	HAGH:ENST00000566709.5:exon9:c.G691T:p.G231C,	exonic	HAGH	.	nonsynonymous SNV	HAGH:ENST00000566709.5:exon9:c.G691T:p.G231C,	rs79226134	0.0229633	.	.	0.002	0.0266	0.0863	.	.	.	.	.	.	.	.	.	D	D	0.0130	0.013	0.0009	0.0008	0.1109	0.0115	0.0018	0.0134	0.0214	.	.	.
chr16	1954141	1954141	C	T	exonic	RPL3L	.	nonsynonymous SNV	RPL3L:NM_005061:exon2:c.G11A:p.R4Q,	exonic	ENST00000268661.7	.	nonsynonymous SNV	ENST00000268661.7:ENST00000268661.7:exon2:c.G11A:p.R4Q,	exonic	RPL3L	.	unknown	UNKNOWN,	rs201864074	0.000199681	.	.	0.001	.	.	.	.	.	.	.	.	.	.	.	D	T	0.0015	0.0015	0.0002	0	0	0.0207	0.0013	0	0.0001	0	D	0.851
chr16	2456799	2456799	G	A	exonic	CCNF	.	nonsynonymous SNV	CCNF:NM_001323538:exon16:c.G1216A:p.V406M	exonic	ENST00000397066.8	.	nonsynonymous SNV	ENST00000397066.8:ENST00000397066.8:exon17:c.G2140A:p.V714M,	exonic	CCNF	.	unknown	UNKNOWN,	rs61755288	0.00319489	0.0023	0.0014	0.0119	.	.	0.0106	0.0027	0.0147	.	703569	not_provided	MedGen:CN517202	criteria_provided,_single_submitter	Benign	D	T	0.0100	0.01	0.0028	0.0025	0.0001	0.0264	0.0144	0.0033	0.0009	0.09	T	0.918
chr16	3090041	3090041	C	T	exonic	ZSCAN10	.	nonsynonymous SNV	ZSCAN10:NM_001365273:exon4:c.G211A:p.E71K	exonic	ENST00000576985.5;ZSCAN10	.	nonsynonymous SNV	ZSCAN10:ENST00000252463.6:exon5:c.G1228A:p.E410K	exonic	ZSCAN10	.	nonsynonymous SNV	ZSCAN10:ENST00000252463.6:exon5:c.G1228A:p.E410K	rs139013310	0.000998403	.	.	.	.	0.005	.	.	.	.	.	.	.	.	.	T	T	0.0005	0.0005	0	0	0.0094	0	0	0	0	0.01	D	0.93
chr16	3137426	3137426	G	A	exonic	ZNF213	.	nonsynonymous SNV	ZNF213:NM_001134655:exon2:c.G146A:p.R49Q	exonic	ENST00000396878.7;ZNF213	.	nonsynonymous SNV	ZNF213:ENST00000572647.5:exon1:c.G23A:p.R8Q	exonic	ZNF213	.	nonsynonymous SNV	ZNF213:ENST00000396878.7:exon2:c.G146A:p.R49Q	rs200158720	.	.	.	.	.	.	.	.	.	.	.	.	.	.	.	D	T	1.678e-05	1.678e-05	0	0	0	0	3.07e-05	0	0	0	D	1.0
chr16	3224286	3224286	G	T	exonic	ZNF200	.	nonsynonymous SNV	ZNF200:NM_001145446:exon5:c.C791A:p.S264Y	exonic	ZNF200	.	nonsynonymous SNV	ZNF200:ENST00000396868.7:exon5:c.C791A:p.S264Y	exonic	ZNF200	.	nonsynonymous SNV	ZNF200:ENST00000396868.7:exon5:c.C791A:p.S264Y	rs117151961	0.014976	.	0.0144	0.0099	0.0562	.	0.0065	0.0011	0.0092	.	.	.	.	.	.	D	T	0.0126	0.0126	0.0015	0.0042	0.0005	0.0088	0.0099	0.0154	0.0442	0	D	0.865
chr16	3224356	3224356	G	A	exonic	ZNF200	.	nonsynonymous SNV	ZNF200:NM_001145446:exon5:c.C721T:p.L241F	exonic	ZNF200	.	nonsynonymous SNV	ZNF200:ENST00000396868.7:exon5:c.C721T:p.L241F	exonic	ZNF200	.	nonsynonymous SNV	ZNF200:ENST00000396868.7:exon5:c.C721T:p.L241F	rs146563741	0.000798722	.	.	.	.	0.004	.	.	.	.	.	.	.	.	.	D	T	0.0004	0.0004	0	0	0.0053	0	0	0	0	0.2	T	0.762
chr16	3254303	3254303	-	GCGG	exonic	MEFV	.	frameshift insertion	MEFV:NM_000243:exon2:c.764_765insCCGC:p.N256Rfs*70,	exonic	MEFV	.	frameshift insertion	MEFV:ENST00000219596.5:exon2:c.764_765insCCGC:p.N256Rfs*70	exonic	MEFV	.	frameshift insertion	MEFV:ENST00000219596.5:exon2:c.764_765insCCGC:p.N256Rfs*70,	rs104895138	.	.	.	.	.	.	.	.	.	.	103436	Familial_Mediterranean_fever	MedGen:C0031069,OMIM:249100,Orphanet:ORPHA342,SNOMED_CT:12579009	criteria_provided,_single_submitter	Uncertain_significance	.	.	8.239e-06	8.239e-06	0	0	0.0001	0	0	0	0	.	.	.
chr16	3383265	3383265	G	A	exonic	ZSCAN32	.	nonsynonymous SNV	ZSCAN32:NM_001284529:exon3:c.C814T:p.R272C	exonic	ENST00000396846.7;ENST00000396852.8;ZSCAN32	.	nonsynonymous SNV	ZSCAN32:ENST00000439568.2:exon3:c.C814T:p.R272C	exonic	ZSCAN32	.	nonsynonymous SNV	ZSCAN32:ENST00000439568.2:exon3:c.C814T:p.R272C	rs375098698	.	.	.	.	.	.	7.7e-05	.	0.0001	.	.	.	.	.	.	D	T	2.473e-05	2.473e-05	9.619e-05	8.658e-05	0	0	1.499e-05	0	0	0.02	D	1.0
chr16	11281216	11281216	C	T	exonic	PRM1	.	nonsynonymous SNV	PRM1:NM_002761:exon1:c.G23A:p.R8H,	exonic	ENST00000312511.3	.	nonsynonymous SNV	ENST00000312511.3:ENST00000312511.3:exon1:c.G23A:p.R8H,	exonic	PRM1	.	unknown	UNKNOWN,	rs199599237	0.000599042	.	.	0.001	0.002	.	7.7e-05	.	0.0001	.	.	.	.	.	.	.	.	0.0010	0.001	0	0.0003	0	0.0068	0.0006	0.0011	0.0021	0	D	1.0
chr16	16048222	16048222	G	T	exonic	ABCC1	.	nonsynonymous SNV	ABCC1:NM_004996:exon10:c.G1299T:p.R433S,	exonic	ABCC1;ENST00000399410.7	.	nonsynonymous SNV	ABCC1:ENST00000399408.6:exon10:c.G321T:p.R107S	exonic	ABCC1	.	nonsynonymous SNV	ABCC1:ENST00000399408.6:exon10:c.G321T:p.R107S,	rs60782127	0.00219649	.	0.0029	0.008	0.001	.	0.0087	0.0017	0.0122	.	482274	not_provided	MedGen:CN517202	criteria_provided,_conflicting_interpretations	Conflicting_interpretations_of_pathogenicity	D	D	0.0094	0.0094	0.0018	0.0048	0	0.0125	0.0140	0.0078	0.0024	0	D	1.0
chr16	20421343	20421343	C	G	exonic	ACSM5	.	nonsynonymous SNV	ACSM5:NM_001324371:exon5:c.C709G:p.P237A	exonic	ACSM5	.	nonsynonymous SNV	ACSM5:ENST00000573920.1:exon1:c.C70G:p.P24A	exonic	ACSM5	.	nonsynonymous SNV	ACSM5:ENST00000331849.8:exon5:c.C709G:p.P237A,	rs150645471	0.00439297	.	0.0072	.	0.001	0.0159	0.0004	0.0007	0.0002	.	.	.	.	.	.	D	D	0.0039	0.0039	0.0006	0.0247	0.0204	0	0.0001	0.0011	6.103e-05	0.04	D	1.0
chr16	21037874	21037874	C	A	exonic	DNAH3	.	nonsynonymous SNV	DNAH3:NM_001347886:exon34:c.G4699T:p.A1567S	exonic	DNAH3	.	nonsynonymous SNV	DNAH3:ENST00000261383.3:exon34:c.G4837T:p.A1613S,	exonic	DNAH3	.	nonsynonymous SNV	DNAH3:ENST00000261383.3:exon34:c.G4837T:p.A1613S,	rs141984585	0.000998403	.	.	.	.	0.005	.	.	.	.	.	.	.	.	.	D	T	0.0004	0.0004	0	0	0.0042	0.0002	6e-05	0.0011	0.0002	0.02	D	1.0
chr16	23392470	23392470	C	T	exonic	COG7	.	nonsynonymous SNV	COG7:NM_153603:exon16:c.G2056A:p.A686T,	exonic	COG7;ENST00000307149.9	.	nonsynonymous SNV	ENST00000307149.9:ENST00000307149.9:exon16:c.G2056A:p.A686T,	exonic	COG7	.	unknown	UNKNOWN,	rs140441189	.	.	.	.	.	.	0.0002	.	0.0002	.	.	.	.	.	.	T	T	8.24e-05	8.24e-05	0	0	0.0009	0	0	0	0.0001	0.11	T	1.0
chr16	29780254	29780254	C	G	exonic	ZG16	.	nonsynonymous SNV	ZG16:NM_152338:exon4:c.C339G:p.D113E,	exonic	ENST00000400752.5	.	nonsynonymous SNV	ENST00000400752.5:ENST00000400752.5:exon4:c.C339G:p.D113E,	exonic	ZG16	.	nonsynonymous SNV	ZG16:ENST00000400752.5:exon4:c.C339G:p.D113E,	rs143840454	0.0071885	0.0015	0.0115	0.0258	.	.	0.0177	0.0051	0.0233	.	.	.	.	.	.	D	T	0.0130	0.013	0.0042	0.0065	0	0.0442	0.0216	0.0273	0.0006	0	D	0.945
chr16	31428324	31428324	A	G	exonic	COX6A2	.	startloss	COX6A2:NM_005205:exon1:c.T2C:p.M1T,	exonic	ENST00000287490.4	.	startloss	ENST00000287490.4:ENST00000287490.4:exon1:c.T2C:p.M1T,	exonic	COX6A2	.	unknown	UNKNOWN,	rs200780049	.	.	.	.	.	.	0.0002	.	0.0003	.	.	.	.	.	.	D	.	0.0007	0.0007	0	0.0003	0	0.0025	0.0011	0	0	0	D	0.967
chr16	47515562	47515562	G	T	exonic	PHKB	.	nonsynonymous SNV	PHKB:NM_000293:exon6:c.G555T:p.M185I	exonic	ENST00000323584.9;PHKB	.	nonsynonymous SNV	PHKB:ENST00000299167.12:exon6:c.G555T:p.M185I	exonic	PHKB	.	nonsynonymous SNV	PHKB:ENST00000299167.12:exon6:c.G555T:p.M185I	rs56257827	0.00359425	.	0.0072	0.0119	0.001	.	0.0109	0.0023	0.0152	.	195228	not_specified|not_provided	MedGen:CN169374|MedGen:CN517202	criteria_provided,_multiple_submitters,_no_conflicts	Benign/Likely_benign	D	D	0.0110	0.011	0.0017	0.0050	0	0.0123	0.0172	0.0155	0.0014	0.03	D	0.99
chr16	57568088	57568088	C	T	exonic	ADGRG5	.	nonsynonymous SNV	ADGRG5:NM_001304376:exon9:c.C1054T:p.R352C	exonic	ADGRG5;ENST00000349457.7	.	nonsynonymous SNV	ADGRG5:ENST00000340339.4:exon9:c.C1054T:p.R352C	exonic	ADGRG5	.	nonsynonymous SNV	ADGRG5:ENST00000340339.4:exon9:c.C1054T:p.R352C,	rs192608331	0.000399361	.	.	0.001	0.001	.	0.0002	.	0.0002	.	.	.	.	.	.	D	T	0.0009	0.0009	0	8.648e-05	0.0006	0.0014	0.0005	0.0011	0.0038	0.01	D	1.0
chr16	58667412	58667412	G	A	exonic	SLC38A7	.	nonsynonymous SNV	SLC38A7:NM_001308384:exon8:c.C959T:p.T320M	exonic	ENST00000219320.8;SLC38A7	.	nonsynonymous SNV	SLC38A7:ENST00000564100.5:exon8:c.C959T:p.T320M,	exonic	SLC38A7	.	nonsynonymous SNV	SLC38A7:ENST00000564100.5:exon8:c.C959T:p.T320M,	rs117111840	0.00379393	.	0.0072	0.007	.	0.0069	0.0042	0.0011	0.0057	.	715003	not_provided	MedGen:CN517202	criteria_provided,_single_submitter	Benign	T	T	0.0038	0.0038	0.0008	0.0031	0.0077	0.0026	0.0048	0.0011	0.0004	.	.	.
chr16	67180090	67180090	G	A	exonic	KIAA0895L	.	nonsynonymous SNV	KIAA0895L:NM_001040715:exon2:c.C521T:p.T174M	exonic	ENST00000563902.1;KIAA0895L	.	nonsynonymous SNV	ENST00000563902.1:ENST00000563902.1:exon2:c.C521T:p.T174M	exonic	KIAA0895L	.	nonsynonymous SNV	KIAA0895L:ENST00000290881.11:exon3:c.C521T:p.T174M	rs181055064	0.000798722	.	.	.	.	0.004	0.0002	.	0.0004	.	.	.	.	.	.	T	.	0.0007	0.0007	0	0	0.0070	0	0.0001	0.0011	0.0005	0.22	T	0.621
chr16	67286469	67286469	C	T	exonic	PLEKHG4	.	nonsynonymous SNV	PLEKHG4:NM_001129731:exon14:c.C2314T:p.H772Y	exonic	ENST00000379344.7;PLEKHG4	.	nonsynonymous SNV	PLEKHG4:ENST00000450733.5:exon14:c.C2314T:p.H772Y	exonic	PLEKHG4	.	nonsynonymous SNV	PLEKHG4:ENST00000450733.5:exon14:c.C2314T:p.H772Y	rs138199982	0.00179712	.	.	.	.	0.0089	0.0003	.	0.0005	.	.	.	.	.	.	D	T	0.0011	0.0011	0	0	0.0117	0	0.0003	0	0.0007	0.1	T	0.523
chr16	67540192	67540192	G	A	exonic	RIPOR1	.	nonsynonymous SNV	RIPOR1:NM_001193522:exon7:c.G566A:p.R189H	exonic	ENST00000042381.8;RIPOR1	.	nonsynonymous SNV	RIPOR1:ENST00000566559.5:exon6:c.G554A:p.R185H	exonic	FAM65A	.	nonsynonymous SNV	FAM65A:ENST00000379312.7:exon7:c.G566A:p.R189H	rs199511942	.	.	.	.	.	.	7.7e-05	.	0.0001	ID=COSM972453,COSM1588484;OCCURENCE=1(endometrium)	.	.	.	.	.	T	T	0.0002	0.0002	9.787e-05	0	0	0.0009	0.0002	0.0022	6.064e-05	0.09	T	1.0
chr16	70478446	70478446	G	A	exonic	FCSK	.	nonsynonymous SNV	FCSK:NM_145059:exon21:c.G2816A:p.R939Q,	exonic	ENST00000288078.10;FCSK	.	nonsynonymous SNV	FCSK:ENST00000571514.5:exon13:c.G1289A:p.R430Q	exonic	FUK	.	nonsynonymous SNV	FUK:ENST00000571514.5:exon13:c.G1289A:p.R430Q	rs17886060	0.00439297	0.0008	0.0043	0.0109	0.0072	.	0.0102	0.0017	0.0144	.	.	.	.	.	.	D	D	0.0105	0.0105	0.0018	0.0083	0	0.0094	0.0143	0.0078	0.0077	0.04	D	1.0
chr16	72120111	72120111	C	T	exonic	PMFBP1	.	nonsynonymous SNV	PMFBP1:NM_001160213:exon21:c.G2372A:p.R791H,	exonic	PMFBP1	.	nonsynonymous SNV	PMFBP1:ENST00000355636.10:exon20:c.G2372A:p.R791H,	exonic	PMFBP1	.	nonsynonymous SNV	PMFBP1:ENST00000355636.10:exon20:c.G2372A:p.R791H,	rs72787072	0.00319489	.	0.0058	0.006	0.0061	.	0.0084	0.0016	0.0119	.	.	.	.	.	.	T	T	0.0089	0.0089	0.0013	0.0086	0	0.0014	0.0123	0.0088	0.0080	.	.	.
chr16	72797212	72797212	G	C	exonic	ZFHX3	.	nonsynonymous SNV	ZFHX3:NM_001164766:exon8:c.C2728G:p.L910V	exonic	ENST00000268489.9;ZFHX3	.	nonsynonymous SNV	ZFHX3:ENST00000397992.5:exon8:c.C2728G:p.L910V	exonic	ZFHX3	.	nonsynonymous SNV	ZFHX3:ENST00000397992.5:exon8:c.C2728G:p.L910V,	rs79037957	0.00439297	0.0008	0.0014	0.0189	0.001	.	0.0092	0.0025	0.0127	.	.	.	.	.	.	D	T	0.0111	0.0111	0.0015	0.0042	0	0.0310	0.0159	0.0121	0.0005	0.02	D	0.948
chr16	76467407	76467407	G	C	exonic	CNTNAP4	.	nonsynonymous SNV	CNTNAP4:NM_001322178:exon9:c.G1389C:p.Q463H	exonic	CNTNAP4;ENST00000611870.4	.	nonsynonymous SNV	CNTNAP4:ENST00000377504.8:exon9:c.G1395C:p.Q465H	exonic	CNTNAP4	.	nonsynonymous SNV	CNTNAP4:ENST00000377504.8:exon9:c.G1395C:p.Q465H	rs6564343	0.0333466	0.1135	0.0029	.	.	0.0149	0.0280	0.0812	0.0008	.	.	.	.	.	.	T	T	0.0099	0.0099	0.0851	0.0051	0.0198	0.0006	0.0009	0.0077	0.0010	0.17	T	1.0
chr16	83899350	83899350	C	T	exonic	MLYCD	.	nonsynonymous SNV	MLYCD:NM_012213:exon1:c.C206T:p.A69V,	exonic	ENST00000262430.5	.	nonsynonymous SNV	ENST00000262430.5:ENST00000262430.5:exon1:c.C206T:p.A69V,	exonic	MLYCD	.	unknown	UNKNOWN,	rs200579941	0.000798722	.	.	0.004	.	.	0.0032	0.0007	0.0043	.	247120	Deficiency_of_malonyl-CoA_decarboxylase|not_specified|not_provided	MedGen:C0342793,OMIM:248360,Orphanet:ORPHA943,SNOMED_CT:124594007,SNOMED_CT:361203007|MedGen:CN169374|MedGen:CN517202	criteria_provided,_multiple_submitters,_no_conflicts	Benign/Likely_benign	T	D	0.0075	0.0075	0	0.0185	0	0	0.0203	0	0.0001	0.37	T	0.685
chr16	84165964	84165964	G	A	exonic	DNAAF1	.	nonsynonymous SNV	DNAAF1:NM_001318756:exon3:c.G289A:p.E97K,	intronic	DNAAF1;ENST00000378553.9	.	.	.	intronic	DNAAF1	.	.	.	rs774316277	.	.	.	.	.	.	.	.	.	.	255919	not_specified	MedGen:CN169374	criteria_provided,_single_submitter	Likely_benign	.	.	4.961e-05	4.961e-05	0	8.661e-05	0	0	7.515e-05	0	0	.	.	.
chr16	84180057	84180057	C	G	exonic	TAF1C	.	nonsynonymous SNV	TAF1C:NM_001243158:exon10:c.G592C:p.A198P	exonic	TAF1C	.	nonsynonymous SNV	TAF1C:ENST00000570117.5:exon10:c.G592C:p.A198P	exonic	TAF1C	.	nonsynonymous SNV	TAF1C:ENST00000570117.5:exon10:c.G592C:p.A198P	rs199743201	0.000199681	.	.	0.001	.	.	.	.	.	.	.	.	.	.	.	D	T	0.0009	0.0009	0	0	0	0.0098	0.0006	0.0027	0	0.04	D	0.996
chr16	89919617	89919617	T	C	exonic	MC1R	.	nonsynonymous SNV	MC1R:NM_002386:exon1:c.T359C:p.I120T,	exonic	AC092143.1;MC1R	.	nonsynonymous SNV	MC1R:ENST00000555147.1:exon1:c.T359C:p.I120T	exonic	MC1R;RP11-566K11.2	.	nonsynonymous SNV	MC1R:ENST00000555147.1:exon1:c.T359C:p.I120T	rs33932559	0.00838658	.	.	.	.	0.0417	0.0002	.	0.0002	.	227383	Cutaneous_malignant_melanoma_5|Malignant_Melanoma_Susceptibility|not_specified|not_provided	MedGen:C2751295,OMIM:613099|MedGen:C3836884|MedGen:CN169374|MedGen:CN517202	criteria_provided,_conflicting_interpretations	Conflicting_interpretations_of_pathogenicity	D	T	0.0033	0.0033	0	0.0007	0.0414	0	0.0002	0.0045	0.0009	.	.	0.656
chr17	2379485	2379485	G	A	exonic	SGSM2	.	nonsynonymous SNV	SGSM2:NM_001098509:exon23:c.G2986A:p.V996I	exonic	ENST00000268989.7;SGSM2	.	nonsynonymous SNV	SGSM2:ENST00000426855.6:exon23:c.G2986A:p.V996I	exonic	SGSM2	.	nonsynonymous SNV	SGSM2:ENST00000426855.6:exon23:c.G2986A:p.V996I,	rs61741902	0.00499201	.	0.013	0.0119	0.0041	.	0.0101	0.0030	0.0138	.	.	.	.	.	.	D	T	0.0101	0.0101	0.0023	0.0055	0	0.0120	0.0133	0.0115	0.0098	0.06	T	0.605
chr17	4742374	4742374	C	T	exonic	ZMYND15	.	nonsynonymous SNV	ZMYND15:NM_001136046:exon5:c.C1027T:p.R343W	exonic	ENST00000433935.5;ZMYND15	.	nonsynonymous SNV	ZMYND15:ENST00000573751.2:exon4:c.C1027T:p.R343W	exonic	ZMYND15	.	nonsynonymous SNV	ZMYND15:ENST00000573751.2:exon4:c.C1027T:p.R343W	rs117858568	0.000199681	.	.	0.001	.	.	0.0004	.	0.0006	.	.	.	.	.	.	T	T	0.0002	0.0002	0	0	0	0	0.0004	0	0	0.13	T	0.996
chr17	5541951	5541951	C	T	exonic	NLRP1	.	nonsynonymous SNV	NLRP1:NM_001033053:exon6:c.G2605A:p.E869K	exonic	ENST00000262467.9;ENST00000572272.5;NLRP1	.	nonsynonymous SNV	ENST00000262467.9:ENST00000262467.9:exon6:c.G2605A:p.E869K	exonic	NLRP1	.	nonsynonymous SNV	NLRP1:ENST00000354411.7:exon6:c.G2605A:p.E869K	rs146505967	0.000199681	.	.	0.001	.	.	0.0009	0.0005	0.0012	.	704237	not_provided	MedGen:CN517202	criteria_provided,_single_submitter	Benign	T	T	0.0014	0.0014	9.72e-05	0	0	0.0084	0.0016	0.0011	0.0006	0.15	T	0.621
chr17	8234525	8234525	C	T	exonic	CTC1	.	nonsynonymous SNV	CTC1:NM_025099:exon10:c.G1748A:p.S583N,	exonic	CTC1;ENST00000315684.13	.	nonsynonymous SNV	ENST00000315684.13:ENST00000315684.13:exon10:c.G1748A:p.S583N	exonic	CTC1	.	unknown	UNKNOWN,	rs568980956	0.000599042	.	.	.	.	0.003	.	.	.	.	688868	not_provided	MedGen:CN517202	criteria_provided,_single_submitter	Likely_benign	D	D	8.959e-05	8.959e-05	0	0	0.0023	0	0	0	0	0.03	D	0.961
chr17	8509915	8509915	G	A	exonic	MYH10	.	nonsynonymous SNV	MYH10:NM_005964:exon23:c.C2894T:p.A965V	exonic	MYH10	.	nonsynonymous SNV	MYH10:ENST00000269243.8:exon23:c.C2894T:p.A965V	exonic	MYH10	.	nonsynonymous SNV	MYH10:ENST00000269243.8:exon23:c.C2894T:p.A965V	rs141845979	0.00179712	.	0.0029	0.007	.	.	0.0088	0.0030	0.0117	.	.	.	.	.	.	D	D	0.0079	0.0079	0.0014	0.0016	0	0.0228	0.0108	0.0033	0.0033	0	D	0.62
chr17	8803418	8803418	G	T	exonic	PIK3R6	.	nonsynonymous SNV	PIK3R6:NM_001010855:exon20:c.C2120A:p.A707D	exonic	PIK3R6	.	nonsynonymous SNV	PIK3R6:ENST00000614407.1:exon19:c.C2120A:p.A707D	exonic	PIK3R6	.	nonsynonymous SNV	PIK3R6:ENST00000614407.1:exon19:c.C2120A:p.A707D	rs75767066	0.00878594	.	.	.	.	0.0437	0.0005	0.0013	0.0001	.	.	.	.	.	.	.	.	0.0028	0.0028	0.0004	0	0.0369	0	0	0	0.0003	.	.	.
chr17	9821858	9821858	C	A	exonic	GSG1L2	.	nonsynonymous SNV	GSG1L2:NM_001310219:exon1:c.G214T:p.V72F,	exonic	GSG1L2	.	nonsynonymous SNV	GSG1L2:ENST00000399363.4:exon1:c.G214T:p.V72F,	exonic	GSG1L2	.	nonsynonymous SNV	GSG1L2:ENST00000399363.4:exon1:c.G214T:p.V72F,	rs57904901	0.0393371	0.0613	0.0605	0.001	0.0133	0.0595	.	.	.	.	.	.	.	.	.	.	T	0.0075	0.0075	0.0599	0.0319	0.0990	0.0006	0.0007	0.0160	0.0050	0	D	.
chr17	16080470	16080470	C	T	exonic	NCOR1	.	nonsynonymous SNV	NCOR1:NM_001190440:exon24:c.G3386A:p.R1129Q	exonic	ENST00000268712.7;NCOR1	.	nonsynonymous SNV	NCOR1:ENST00000395857.7:exon23:c.G3059A:p.R1020Q	exonic	NCOR1	.	nonsynonymous SNV	NCOR1:ENST00000395857.7:exon23:c.G3059A:p.R1020Q	rs150513105	0.00239617	.	.	.	.	0.0119	.	.	.	ID=COSM262336;OCCURENCE=1(large_intestine)	.	.	.	.	.	T	D	0.0009	0.0009	0	0	0.0114	0	4.496e-05	0	0.0002	0.05	D	0.997
chr17	18148133	18148133	C	T	exonic	MYO15A	.	nonsynonymous SNV	MYO15A:NM_016239:exon30:c.C6614T:p.T2205I,	exonic	ENST00000205890.10;ENST00000647165.1;MYO15A	.	nonsynonymous SNV	MYO15A:ENST00000615845.4:exon30:c.C6614T:p.T2205I	exonic	MYO15A	.	nonsynonymous SNV	MYO15A:ENST00000615845.4:exon30:c.C6614T:p.T2205I,	rs121908970	0.000998403	.	.	0.005	.	.	0.0028	0.0005	0.0040	.	21995	Deafness,_with_smith-magenis_syndrome|not_specified|not_provided	MedGen:C4016803|MedGen:CN169374|MedGen:CN517202	criteria_provided,_multiple_submitters,_no_conflicts	Benign/Likely_benign	D	D	0.0042	0.0042	0.0003	0.0009	0	0.0214	0.0049	0.0045	0.0013	0.01	D	0.994
chr17	30379096	30379096	C	T	exonic	CPD	.	nonsynonymous SNV	CPD:NM_001304:exon1:c.C116T:p.A39V,	exonic	ENST00000225719.8	.	nonsynonymous SNV	ENST00000225719.8:ENST00000225719.8:exon1:c.C116T:p.A39V,	exonic	CPD	.	unknown	UNKNOWN,	rs184488188	0.00259585	.	.	.	0.001	0.0119	.	.	.	.	.	.	.	.	.	T	T	0.0043	0.0043	0	0	0.0564	0.0116	0.0014	0.0054	0.0016	0.27	T	0.998
chr17	35152904	35152904	G	C	exonic	UNC45B	.	nonsynonymous SNV	UNC45B:NM_001308281:exon4:c.G393C:p.Q131H	exonic	UNC45B	.	nonsynonymous SNV	UNC45B:ENST00000591048.2:exon4:c.G393C:p.Q131H	exonic	UNC45B	.	nonsynonymous SNV	UNC45B:ENST00000591048.2:exon4:c.G393C:p.Q131H	rs535242800	0.000199681	.	.	.	.	0.001	.	.	.	.	.	.	.	.	.	T	T	0.0002	0.0002	0	0	0.0009	0	1.499e-05	0	0.0006	0.12	T	0.981
chr17	35193644	35193644	C	T	exonic	SLC35G3	.	nonsynonymous SNV	SLC35G3:NM_152462:exon1:c.G664A:p.V222M,	exonic	SLC35G3	.	nonsynonymous SNV	SLC35G3:ENST00000297307.6:exon1:c.G664A:p.V222M,	exonic	SLC35G3	.	nonsynonymous SNV	SLC35G3:ENST00000297307.6:exon1:c.G664A:p.V222M,	rs61755898	0.0257588	0.059	0.0072	0.001	0.002	0.0427	0.0192	0.0540	0.0014	.	.	.	.	.	.	T	T	0.0117	0.0117	0.0554	0.0036	0.0739	0.0009	0.0015	0.0121	0.0033	0.05	D	1.0
chr17	35764021	35764021	T	A	exonic	C17orf50	.	nonsynonymous SNV	C17orf50:NM_145272:exon2:c.T28A:p.L10M,	exonic	C17orf50;ENST00000605587.1	.	nonsynonymous SNV	C17orf50:ENST00000603305.1:exon2:c.T50A:p.L17H	exonic	C17orf50	.	nonsynonymous SNV	C17orf50:ENST00000603305.1:exon2:c.T50A:p.L17H	rs200805689	0.000798722	.	.	0.004	.	.	0.0021	0.0004	0.0029	.	.	.	.	.	.	.	T	0.0029	0.0029	0.0021	0	0	0.0357	0.0066	0.0075	0	0	D	1.0
chr17	37476885	37476885	G	A	exonic	TADA2A	.	nonsynonymous SNV	TADA2A:NM_001166105:exon16:c.G1235A:p.R412K	exonic	ENST00000615182.4;TADA2A	.	nonsynonymous SNV	TADA2A:ENST00000612272.4:exon16:c.G1235A:p.R412K	exonic	TADA2A	.	nonsynonymous SNV	TADA2A:ENST00000612272.4:exon16:c.G1235A:p.R412K,	rs186687337	0.000599042	.	.	.	.	0.003	.	.	.	.	.	.	.	.	.	.	.	0.0002	0.0002	0	0	0.0023	0	0	0	0.0004	1	T	0.92
chr17	38330965	38330965	C	G	exonic	GPR179	.	nonsynonymous SNV	GPR179:NM_001004334:exon11:c.G2604C:p.E868D,	exonic	GPR179	.	nonsynonymous SNV	GPR179:ENST00000616987.4:exon11:c.G2604C:p.E868D	exonic	GPR179	.	nonsynonymous SNV	GPR179:ENST00000616987.4:exon11:c.G2604C:p.E868D	rs201214109	0.000599042	.	.	0.003	.	.	0.0031	0.0007	0.0043	.	345748	Congenital_Stationary_Night_Blindness,_Recessive	MedGen:CN239273	criteria_provided,_single_submitter	Uncertain_significance	.	.	0.0059	0.0059	0.0006	0.0008	0.0001	0.0113	0.0091	0.0057	0.0009	0.35	T	0.999
chr17	38878112	38878112	C	T	exonic	LASP1	.	stopgain	LASP1:NM_001271608:exon2:c.C13T:p.R5X,	exonic	ENST00000318008.10;LASP1	.	stopgain	LASP1:ENST00000433206.6:exon2:c.C13T:p.R5X,	exonic	LASP1	.	stopgain	LASP1:ENST00000433206.6:exon2:c.C13T:p.R5X,	rs141320621	0.00219649	.	.	0.002	.	0.0089	0.0003	.	0.0005	.	740705	not_provided	MedGen:CN517202	criteria_provided,_single_submitter	Benign	.	.	0.0028	0.0028	0	8.637e-05	0.0103	0.0163	0.0016	0.0077	0.0017	1	T	.
chr17	39904819	39904819	G	C	exonic	GSDMB	.	nonsynonymous SNV	GSDMB:NM_018530:exon8:c.C1178G:p.S393C	exonic	GSDMB	.	nonsynonymous SNV	GSDMB:ENST00000394175.6:exon8:c.C1178G:p.S393C	exonic	GSDMB	.	nonsynonymous SNV	GSDMB:ENST00000394175.6:exon8:c.C1178G:p.S393C	rs150508589	0.000798722	.	.	0.003	0.001	.	0.0013	0.0002	0.0019	.	.	.	.	.	.	D	T	0.0016	0.0016	0.0002	0.0004	0	0.0014	0.0016	0.0033	0.0038	0	D	1.0
chr17	40660093	40660093	C	G	exonic	KRT222	.	nonsynonymous SNV	KRT222:NM_152349:exon3:c.G340C:p.G114R,	exonic	AC073508.2;ENST00000394052.4	.	nonsynonymous SNV	ENST00000394052.4:ENST00000394052.4:exon3:c.G340C:p.G114R	exonic	KRT222;RP5-1028K7.3	.	nonsynonymous SNV	RP5-1028K7.3:ENST00000476049.1:exon3:c.G340C:p.G114R,	rs148476018	0.000399361	.	.	.	.	0.002	.	.	.	.	.	.	.	.	.	D	D	3.295e-05	3.295e-05	0	0	0.0005	0	0	0	0	0.01	D	0.999
chr17	42989395	42989395	A	C	exonic	RUNDC1	.	nonsynonymous SNV	RUNDC1:NM_173079:exon3:c.A712C:p.S238R	exonic	RUNDC1	.	nonsynonymous SNV	RUNDC1:ENST00000361677.5:exon3:c.A712C:p.S238R,	exonic	RUNDC1	.	nonsynonymous SNV	RUNDC1:ENST00000361677.5:exon3:c.A712C:p.S238R,	rs546662271	0.00119808	.	.	.	0.0061	.	.	.	.	.	.	.	.	.	.	T	T	0.0004	0.0004	0	0	0	0	4.498e-05	0	0.0025	0.5	T	0.627
chr17	44928486	44928486	T	C	exonic	KIF18B	.	nonsynonymous SNV	KIF18B:NM_001264573:exon13:c.A1852G:p.T618A	exonic	ENST00000593135.5;KIF18B	.	nonsynonymous SNV	KIF18B:ENST00000590129.1:exon12:c.A1879G:p.T627A	exonic	KIF18B	.	nonsynonymous SNV	KIF18B:ENST00000590129.1:exon12:c.A1879G:p.T627A	rs770704894	.	.	.	.	.	.	.	.	.	.	.	.	.	.	.	.	T	9.121e-05	9.121e-05	0	0	0	0	0	0	0.0003	0.82	T	0.824
chr17	47374937	47374937	C	T	exonic	EFCAB13	.	nonsynonymous SNV	EFCAB13:NM_001195192:exon10:c.C1055T:p.S352F	exonic	EFCAB13;ENST00000331493.6	.	nonsynonymous SNV	EFCAB13:ENST00000517484.5:exon10:c.C1055T:p.S352F	exonic	EFCAB13	.	nonsynonymous SNV	EFCAB13:ENST00000517484.5:exon10:c.C1055T:p.S352F,	rs554788706	0.000199681	.	.	.	0.001	.	.	.	.	.	.	.	.	.	.	D	T	0.0002	0.0002	0	0	0	0	6.208e-05	0	0.0012	.	.	0.582
chr17	47818326	47818326	G	A	exonic	OSBPL7	.	nonsynonymous SNV	OSBPL7:NM_145798:exon7:c.C541T:p.R181W,	exonic	ENST00000007414.7;OSBPL7	.	nonsynonymous SNV	OSBPL7:ENST00000579728.5:exon6:c.C541T:p.R181W	exonic	OSBPL7	.	nonsynonymous SNV	OSBPL7:ENST00000392507.7:exon7:c.C541T:p.R181W	rs35767160	0.00139776	.	0.0014	0.006	.	.	0.0038	0.0011	0.0051	.	.	.	.	.	.	D	T	0.0037	0.0037	0.0011	0.0032	0	0.0006	0.0054	0.0022	0.0024	0.01	D	0.995
chr17	48610734	48610734	C	G	exonic	HOXB7	.	nonsynonymous SNV	HOXB7:NM_004502:exon1:c.G185C:p.G62A,	exonic	ENST00000239165.8	.	nonsynonymous SNV	ENST00000239165.8:ENST00000239165.8:exon1:c.G185C:p.G62A,	exonic	HOXB7	.	nonsynonymous SNV	HOXB7:ENST00000239165.8:exon1:c.G185C:p.G62A,	rs2303483	.	.	.	.	.	.	.	.	.	.	.	.	.	.	.	T	T	0.0004	0.0004	0	0.0006	0.0031	0	0.0001	0	0.0004	0.71	T	0.956
chr17	48626038	48626038	A	G	exonic	HOXB9	.	nonsynonymous SNV	HOXB9:NM_024017:exon1:c.T232C:p.Y78H,	exonic	ENST00000311177.6	.	nonsynonymous SNV	ENST00000311177.6:ENST00000311177.6:exon1:c.T232C:p.Y78H,	exonic	HOXB9	.	unknown	UNKNOWN,	rs184775794	0.00359425	0.0008	0.0159	.	.	0.006	.	.	.	.	715520	not_provided	MedGen:CN517202	criteria_provided,_single_submitter	Benign	D	D	0.0064	0.0064	0.0020	0.1187	0.0090	0	0.0003	0	0	0.05	D	0.995
chr17	62711335	62711335	C	T	exonic	MARCHF10	.	nonsynonymous SNV	MARCHF10:NM_001100875:exon9:c.G2224A:p.E742K	exonic	ENST00000311269.9;MARCH10	.	nonsynonymous SNV	MARCH10:ENST00000580520.5:exon5:c.G1828A:p.E610K	exonic	MARCH10	.	nonsynonymous SNV	MARCH10:ENST00000456609.6:exon9:c.G2224A:p.E742K	rs16946335	0.00339457	0.0008	.	.	.	0.0159	0.0002	.	0.0002	.	.	.	.	.	.	D	T	0.0017	0.0017	9.626e-05	0	0.0167	0.0005	0.0002	0.0022	0.0024	0.06	T	1.0
chr17	65225096	65225096	G	A	exonic	RGS9	.	nonsynonymous SNV	RGS9:NM_001081955:exon18:c.G1493A:p.R498H	exonic	ENST00000262406.9;RGS9	.	nonsynonymous SNV	ENST00000262406.9:ENST00000262406.9:exon18:c.G1502A:p.R501H	exonic	RGS9	.	nonsynonymous SNV	RGS9:ENST00000443584.7:exon18:c.G1493A:p.R498H	rs34797451	0.00399361	.	0.0029	0.0149	0.001	0.002	0.0137	0.0047	0.0181	.	100279	not_specified	MedGen:CN169374	criteria_provided,_single_submitter	Benign	D	T	0.0109	0.0109	0.0031	0.0043	0.0005	0.0109	0.0167	0.0044	0.0021	0.01	D	0.976
chr17	72649203	72649203	C	T	exonic	SLC39A11	.	nonsynonymous SNV	SLC39A11:NM_001159770:exon8:c.G758A:p.R253Q	exonic	SLC39A11	.	nonsynonymous SNV	SLC39A11:ENST00000582769.5:exon5:c.G485A:p.R162Q	exonic	SLC39A11	.	nonsynonymous SNV	SLC39A11:ENST00000255559.7:exon8:c.G737A:p.R246Q	rs150096159	0.00279553	.	0.0043	0.007	0.0041	.	0.0056	0.0007	0.0081	.	.	.	.	.	.	T	T	0.0054	0.0054	0.0007	0.0017	0.0001	0.0015	0.0074	0.0068	0.0073	0.19	T	0.903
chr17	74872925	74872925	C	A	exonic	FDXR	.	nonsynonymous SNV	FDXR:NM_001258012:exon1:c.G20T:p.R7L	exonic	ENST00000293195.9;FDXR	.	nonsynonymous SNV	ENST00000293195.9:ENST00000293195.9:exon1:c.G20T:p.R7L	exonic	FDXR	.	nonsynonymous SNV	FDXR:ENST00000413947.6:exon1:c.G20T:p.R7L	rs28365947	0.00319489	.	.	.	.	0.0159	.	.	.	.	.	.	.	.	.	D	T	0.0031	0.0031	0	0	0.0627	0	0	0.0141	0.0004	0.04	D	0.532
chr17	75239018	75239018	C	T	exonic	GGA3	.	nonsynonymous SNV	GGA3:NM_001291642:exon12:c.G1480A:p.E494K	exonic	GGA3	.	nonsynonymous SNV	GGA3:ENST00000583282.5:exon1:c.G64A:p.E22K	exonic	GGA3	.	nonsynonymous SNV	GGA3:ENST00000538886.5:exon14:c.G1747A:p.E583K	rs76982026	0.00738818	.	.	.	0.001	0.0357	7.7e-05	.	0.0001	.	.	.	.	.	.	.	T	0.0031	0.0031	0	0.0003	0.0414	0	1.501e-05	0.0056	0.0005	0.01	D	0.988
chr17	76003247	76003247	G	A	exonic	CDK3	.	nonsynonymous SNV	CDK3:NM_001258:exon7:c.G641A:p.R214H,	exonic	CDK3	.	nonsynonymous SNV	CDK3:ENST00000586261.2:exon5:c.G521A:p.R174H	exonic	CDK3	.	nonsynonymous SNV	CDK3:ENST00000425876.6:exon6:c.G641A:p.R214H	rs34670267	0.00738818	.	.	.	.	0.0367	7.7e-05	.	0.0001	.	.	.	.	.	.	D	T	0.0027	0.0027	0	0	0.0358	0	0.0001	0	0.0007	0	D	0.846
chr17	78455748	78455748	C	T	exonic	DNAH17	.	nonsynonymous SNV	DNAH17:NM_173628:exon63:c.G10066A:p.V3356I,	exonic	DNAH17	.	nonsynonymous SNV	DNAH17:ENST00000389840.6:exon63:c.G10066A:p.V3356I	exonic	DNAH17	.	nonsynonymous SNV	DNAH17:ENST00000389840.6:exon63:c.G10066A:p.V3356I	rs111563325	0.00519169	0.0008	0.0072	0.0099	0.0092	0.001	0.0087	0.0043	0.0109	.	.	.	.	.	.	.	T	0.0114	0.0114	0.0038	0.0070	0.0003	0.0050	0.0140	0.0168	0.0171	0.6	T	0.923
chr17	78532540	78532540	G	T	exonic	DNAH17	.	nonsynonymous SNV	DNAH17:NM_173628:exon20:c.C3056A:p.T1019N,	exonic	DNAH17	.	nonsynonymous SNV	DNAH17:ENST00000389840.6:exon20:c.C3056A:p.T1019N	exonic	DNAH17	.	nonsynonymous SNV	DNAH17:ENST00000389840.6:exon20:c.C3056A:p.T1019N	rs77180602	0.0133786	.	0.0029	0.004	0.0061	0.0546	0.0008	0.0002	0.0011	.	.	.	.	.	.	T	T	0.0117	0.0117	0.0011	0.0045	0.0653	0.0535	0.0045	0.0078	0.0054	0.52	T	.
chr17	80251368	80251368	G	A	exonic	SLC26A11	.	nonsynonymous SNV	SLC26A11:NM_001166348:exon16:c.G1696A:p.G566R	exonic	ENST00000361193.7;SLC26A11	.	nonsynonymous SNV	SLC26A11:ENST00000546047.6:exon16:c.G1696A:p.G566R	exonic	SLC26A11	.	nonsynonymous SNV	SLC26A11:ENST00000546047.6:exon16:c.G1696A:p.G566R	rs140131205	0.00319489	.	0.0058	0.0099	0.002	.	0.0047	0.0011	0.0065	.	.	.	.	.	.	D	D	0.0057	0.0057	0.0009	0.0050	0	0.0272	0.0064	0.0077	0.0007	0.49	T	0.998
chr17	81193944	81193944	C	T	exonic	CEP131	.	nonsynonymous SNV	CEP131:NM_001009811:exon18:c.G2303A:p.R768H	exonic	CEP131;ENST00000450824.6	.	nonsynonymous SNV	CEP131:ENST00000573053.5:exon5:c.G620A:p.R207H	exonic	CEP131	.	nonsynonymous SNV	CEP131:ENST00000269392.8:exon18:c.G2312A:p.R771H	rs138784674	0.00459265	.	.	.	.	0.0228	.	.	.	.	.	.	.	.	.	D	T	0.0056	0.0056	0	0	0.1341	0	0.0003	0	0	0.06	T	1.0
chr17	81720105	81720105	G	A	exonic	SLC25A10	.	nonsynonymous SNV	SLC25A10:NM_001270953:exon11:c.G809A:p.R270K,	exonic	SLC25A10	.	nonsynonymous SNV	SLC25A10:ENST00000545862.5:exon11:c.G809A:p.R270K,	exonic	SLC25A10	.	nonsynonymous SNV	SLC25A10:ENST00000545862.5:exon11:c.G809A:p.R270K,	rs370778020	0.000798722	.	.	0.002	0.002	.	0.0010	0.0002	0.0014	.	715829	not_provided	MedGen:CN517202	criteria_provided,_single_submitter	Likely_benign	.	.	0.0012	0.0012	0.0002	8.758e-05	0	0	0.0021	0	0.0004	.	.	.
chr17	82322892	82322892	G	A	exonic	SECTM1	.	stopgain	SECTM1:NM_003004:exon4:c.C523T:p.Q175X,	exonic	ENST00000269389.7;SECTM1	.	stopgain	ENST00000269389.7:ENST00000269389.7:exon4:c.C523T:p.Q175X	exonic	SECTM1	.	stopgain	SECTM1:ENST00000269389.7:exon4:c.C523T:p.Q175X,	rs139132437	0.000798722	0.0008	.	0.003	.	.	0.0015	0.0007	0.0019	.	.	.	.	.	.	.	.	0.0015	0.0015	0.0005	0.0010	0	0.0003	0.0021	0.0012	0.0009	1	T	.
chr17	82586179	82586226	GGAGACCACAGGGAAGTCAAAGGTAGGCGGAGGGGAAAGGAGGAGAGG	-	exonic	FOXK2	.	stopgain	FOXK2:NM_004514:exon7:c.1555_1576del:p.G519*,	exonic	ENST00000335255.9;FOXK2	.	stopgain	ENST00000335255.9:ENST00000335255.9:exon7:c.1555_1576del:p.G519*	exonic	FOXK2	.	unknown	UNKNOWN,	.	.	.	.	.	.	.	.	.	.	.	731197	not_provided	MedGen:CN517202	criteria_provided,_single_submitter	Likely_benign	.	.	0.0003	0.0003	0.0003	0.0002	0.0005	0	4.908e-05	0	0.0016	.	.	.
chr18	12454385	12454385	T	A	exonic	SPIRE1	.	nonsynonymous SNV	SPIRE1:NM_001128627:exon12:c.A1335T:p.Q445H	exonic	SPIRE1	.	nonsynonymous SNV	SPIRE1:ENST00000309836.9:exon11:c.A1104T:p.Q368H	exonic	SPIRE1	.	nonsynonymous SNV	SPIRE1:ENST00000309836.9:exon11:c.A1104T:p.Q368H	rs148627675	.	.	.	.	.	.	7.7e-05	.	0.0001	.	.	.	.	.	.	D	T	4.942e-05	4.942e-05	0	0	0	0	8.991e-05	0	0	0.02	D	1.0
chr18	31140109	31140109	G	A	exonic	DSC1	.	nonsynonymous SNV	DSC1:NM_004948:exon10:c.C1453T:p.P485S	exonic	DSC1	.	nonsynonymous SNV	DSC1:ENST00000257197.7:exon10:c.C1453T:p.P485S	exonic	DSC1	.	nonsynonymous SNV	DSC1:ENST00000257197.7:exon10:c.C1453T:p.P485S	rs74652634	0.0129792	0.0008	.	.	.	0.0635	0.0003	0.0007	0.0001	.	.	.	.	.	.	D	T	0.0063	0.0063	0.0006	0.0002	0.0710	0.0062	0.0012	0.0121	0.0008	0.11	T	0.565
chr18	46563088	46563088	G	A	exonic	LOXHD1	.	nonsynonymous SNV	LOXHD1:NM_144612:exon18:c.C2575T:p.R859W,	exonic	LOXHD1	.	nonsynonymous SNV	LOXHD1:ENST00000441551.6:exon18:c.C2575T:p.R859W	exonic	LOXHD1	.	nonsynonymous SNV	LOXHD1:ENST00000441551.6:exon18:c.C2575T:p.R859W	rs372546084	0.000199681	.	0.0014	.	.	.	0.0002	0.0007	.	.	347073	not_specified|Nonsyndromic_Hearing_Loss,_Recessive	MedGen:CN169374|MedGen:CN239439	criteria_provided,_multiple_submitters,_no_conflicts	Uncertain_significance	D	T	0.0002	0.0002	0.0007	0.0025	0	0	0.0002	0	0	0	D	1.0
chr18	49904688	49904688	C	T	exonic	MYO5B	.	nonsynonymous SNV	MYO5B:NM_001080467:exon20:c.G2555A:p.R852Q,	exonic	ENST00000285039.11	.	nonsynonymous SNV	ENST00000285039.11:ENST00000285039.11:exon20:c.G2555A:p.R852Q,	exonic	MYO5B	.	unknown	UNKNOWN,	rs145283236	0.00179712	.	.	0.0089	.	.	.	.	.	.	.	.	.	.	.	D	T	0.0031	0.0031	0.0001	0	0	0.0408	0.0013	0.0068	0.0001	0.05	D	0.838
chr18	54274033	54274033	G	A	exonic	POLI	.	nonsynonymous SNV	POLI:NM_001351610:exon2:c.G223A:p.V75I	exonic	POLI	.	nonsynonymous SNV	POLI:ENST00000217800.9:exon2:c.G232A:p.V78I	exonic	POLI	.	nonsynonymous SNV	POLI:ENST00000579434.5:exon2:c.G40A:p.V14I	rs142974796	0.000599042	.	.	.	.	0.003	0.0002	.	0.0003	.	.	.	.	.	.	T	T	0.0002	0.0002	0	0	0.0020	0	8.871e-05	0.0026	0.0001	0.24	T	0.858
chr18	54365733	54365733	C	T	exonic	C18orf54	.	nonsynonymous SNV	C18orf54:NM_001288982:exon5:c.C698T:p.P233L	exonic	C18orf54;ENST00000620105.4	.	nonsynonymous SNV	C18orf54:ENST00000578138.5:exon3:c.C92T:p.P31L	exonic	C18orf54	.	nonsynonymous SNV	C18orf54:ENST00000578138.5:exon3:c.C92T:p.P31L	rs150002374	0.000399361	.	.	.	.	0.002	0.0002	.	0.0003	.	.	.	.	.	.	D	T	0.0002	0.0002	0	0	0.0016	0	7.499e-05	0.0022	0.0001	0.25	T	1.0
chr18	57641992	57641992	G	A	exonic	LOC100505549	.	nonsynonymous SNV	LOC100505549:NM_001242804:exon2:c.G79A:p.V27I,	ncRNA_exonic	AC027097.1;AC027097.2	.	.	.	ncRNA_exonic	RP11-35G9.3;RP11-35G9.5	.	.	.	rs145010751	0.0123802	0.0068	.	0.001	0.0031	0.0486	.	.	.	.	.	.	.	.	.	.	.	0.0024	0.0024	0.0053	0	0.0455	.	0	0.0086	0.0023	.	.	.
chr18	57674924	57674924	T	C	exonic	ATP8B1	.	nonsynonymous SNV	ATP8B1:NM_005603:exon16:c.A1729G:p.I577V,	exonic	ATP8B1;ENST00000283684.9	.	nonsynonymous SNV	ENST00000283684.9:ENST00000283684.9:exon16:c.A1729G:p.I577V	exonic	ATP8B1	.	unknown	UNKNOWN,	rs3745078	0.0125799	.	.	0.001	0.0082	0.0536	0.0002	0.0002	0.0001	.	256694	Progressive_familial_intrahepatic_cholestasis|not_specified|not_provided	MedGen:C0268312,Orphanet:ORPHA172,SNOMED_CT:74162007|MedGen:CN169374|MedGen:CN517202	criteria_provided,_multiple_submitters,_no_conflicts	Benign/Likely_benign	T	T	0.0047	0.0047	9.612e-05	0.0003	0.0493	0.0002	8.991e-05	0.0022	0.0079	0.47	T	0.953
chr18	76496529	76496529	-	G	exonic	C18orf65	.	frameshift insertion	C18orf65:NM_001272093:exon2:c.330dupG:p.A113Gfs*6,	ncRNA_exonic	C18orf65	.	.	.	ncRNA_exonic	C18orf65	.	.	.	rs782788867	.	.	.	.	.	.	.	.	.	.	.	.	.	.	.	.	.	0.0012	0.0012	0.0026	0	0	0	0	0	0.0016	.	.	.
chr18	78997228	78997228	C	T	exonic	SALL3	.	nonsynonymous SNV	SALL3:NM_171999:exon3:c.C3809T:p.P1270L,	exonic	SALL3	.	nonsynonymous SNV	SALL3:ENST00000536229.7:exon3:c.C3194T:p.P1065L	exonic	SALL3	.	nonsynonymous SNV	SALL3:ENST00000536229.7:exon3:c.C3194T:p.P1065L	rs200143215	0.000199681	.	.	0.001	.	.	.	.	.	.	.	.	.	.	.	D	T	0.0001	0.0001	0	0	0.0006	0.0005	0.0001	0	0	0	D	0.997
chr19	336140	336140	C	A	exonic	MIER2	.	nonsynonymous SNV	MIER2:NM_017550:exon2:c.G43T:p.V15F,	exonic	MIER2	.	nonsynonymous SNV	MIER2:ENST00000264819.6:exon2:c.G43T:p.V15F,	exonic	MIER2	.	nonsynonymous SNV	MIER2:ENST00000264819.6:exon2:c.G43T:p.V15F,	rs144360477	0.000199681	.	.	.	.	0.001	.	.	.	.	.	.	.	.	.	D	T	0.0002	0.0002	0	0	0.0013	0.0010	9.207e-05	0	0.0002	0.02	D	0.895
chr19	367178	367178	C	T	exonic	THEG	.	nonsynonymous SNV	THEG:NM_199202:exon6:c.G728A:p.R243Q	exonic	ENST00000342640.8;THEG	.	nonsynonymous SNV	THEG:ENST00000530711.3:exon2:c.G133A:p.G45R	exonic	THEG	.	nonsynonymous SNV	THEG:ENST00000530711.3:exon2:c.G133A:p.G45R	rs2278287	0.0229633	.	.	0.001	0.0061	0.1071	0.0003	0.0007	0.0001	.	.	.	.	.	.	D	T	0.0060	0.006	0.0007	8.639e-05	0.0749	0.0020	0.0005	0.0044	0.0015	0	D	1.0
chr19	1122147	1122147	C	G	exonic	SBNO2	.	nonsynonymous SNV	SBNO2:NM_001100122:exon8:c.G970C:p.E324Q	exonic	ENST00000361757.7;SBNO2	.	nonsynonymous SNV	SBNO2:ENST00000438103.6:exon8:c.G970C:p.E324Q	exonic	SBNO2	.	nonsynonymous SNV	SBNO2:ENST00000438103.6:exon8:c.G970C:p.E324Q	rs192343149	0.000798722	0.0008	0.0014	0.002	.	.	0.0019	0.0002	0.0027	.	.	.	.	.	.	D	D	0.0021	0.0021	0.0005	0.0032	0.0017	0	0.0030	0.0119	0	0.04	D	0.793
chr19	1496385	1496385	C	A	exonic	REEP6	.	nonsynonymous SNV	REEP6:NM_001329556:exon4:c.C449A:p.A150D	exonic	ENST00000233596.7;ENST00000395479.8;REEP6	.	nonsynonymous SNV	REEP6:ENST00000395484.4:exon2:c.C233A:p.A78D	exonic	REEP6	.	unknown	UNKNOWN,	rs2271412	0.0209665	0.0008	0.0115	.	.	0.0952	0.0002	.	0.0003	.	716221	not_provided	MedGen:CN517202	criteria_provided,_single_submitter	Benign	T	T	0.0088	0.0088	9.752e-05	0.0026	0.1109	0.0028	0.0004	0.0079	0.0008	0.34	T	0.655
chr19	1528366	1528366	C	T	exonic	PLK5	.	nonsynonymous SNV	PLK5:NM_001243079:exon8:c.C266T:p.P89L,	exonic	ENST00000454744.6;PLK5	.	nonsynonymous SNV	PLK5:ENST00000334770.8:exon7:c.C266T:p.P89L	exonic	PLK5	.	nonsynonymous SNV	PLK5:ENST00000334770.8:exon7:c.C266T:p.P89L	rs116095010	0.0127796	0.0053	0.0187	0.0328	0.0112	.	.	.	.	.	704815	not_provided	MedGen:CN517202	criteria_provided,_single_submitter	Benign	.	T	0.0090	0.009	0.0120	0.0256	0	0.0147	0.0150	0	0.0058	.	.	.
chr19	2353076	2353076	A	G	exonic	SPPL2B	.	nonsynonymous SNV	SPPL2B:NM_152988:exon15:c.A1646G:p.Q549R,	exonic	ENST00000613503.4	.	nonsynonymous SNV	ENST00000613503.4:ENST00000613503.4:exon15:c.A1646G:p.Q549R,	exonic	SPPL2B	.	unknown	UNKNOWN,	rs113009055	0.00419329	.	0.0101	0.0109	0.0031	.	0.0097	0.0020	0.0134	.	.	.	.	.	.	.	.	0.0103	0.0103	0.0019	0.0037	0	0.0279	0.0136	0.0183	0.0049	.	.	.
chr19	2834445	2834445	G	A	exonic	ZNF554	.	nonsynonymous SNV	ZNF554:NM_001102651:exon5:c.G1210A:p.G404R,	exonic	ENST00000317243.9	.	nonsynonymous SNV	ENST00000317243.9:ENST00000317243.9:exon5:c.G1210A:p.G404R,	exonic	ZNF554	.	nonsynonymous SNV	ZNF554:ENST00000317243.9:exon5:c.G1210A:p.G404R,	rs199902086	.	.	.	.	.	.	.	.	.	.	.	.	.	.	.	D	T	0.0013	0.0013	0	0	0	0.0172	0.0005	0.0055	0.0001	0	D	1.0
chr19	7631533	7631533	C	T	exonic	PET100	.	nonsynonymous SNV	PET100:NM_001171155:exon4:c.C199T:p.R67C,	exonic	ENST00000594797.5;PET100	.	nonsynonymous SNV	PET100:ENST00000456958.7:exon3:c.C112T:p.R38C	exonic	PET100	.	nonsynonymous SNV	PET100:ENST00000456958.7:exon3:c.C112T:p.R38C	rs117661715	0.0267572	.	0.013	0.006	0.0061	0.1121	.	.	.	.	377914	not_specified|not_provided	MedGen:CN169374|MedGen:CN517202	criteria_provided,_multiple_submitters,_no_conflicts	Benign	.	.	0.0041	0.0041	0.0017	0.0072	0.0977	0	0.0016	0.0139	0.0026	0	D	0.999
chr19	8086211	8086211	G	A	exonic	FBN3	.	nonsynonymous SNV	FBN3:NM_001321431:exon55:c.C6869T:p.T2290I	exonic	ENST00000600128.5;FBN3	.	nonsynonymous SNV	FBN3:ENST00000270509.6:exon54:c.C6869T:p.T2290I	exonic	FBN3	.	nonsynonymous SNV	FBN3:ENST00000270509.6:exon54:c.C6869T:p.T2290I	rs79008349	0.00359425	.	.	.	0.001	0.0169	.	.	.	.	742224	not_provided	MedGen:CN517202	criteria_provided,_single_submitter	Benign	T	D	0.0014	0.0014	0	0	0.0185	0	3.059e-05	0.0011	0.0002	0.26	T	1.0
chr19	8937659	8937659	G	T	exonic	MUC16	.	nonsynonymous SNV	MUC16:NM_024690:exon5:c.C33296A:p.T11099N,	exonic	MUC16	.	nonsynonymous SNV	MUC16:ENST00000397910.8:exon5:c.C33296A:p.T11099N,	exonic	MUC16	.	nonsynonymous SNV	MUC16:ENST00000397910.8:exon5:c.C33296A:p.T11099N,	rs181023919	0.00279553	.	.	0.0139	.	.	0.0002	.	0.0002	.	.	.	.	.	.	D	T	0.0063	0.0063	0	0.0004	0	0.0658	0.0045	0.0256	0	0	D	0.991
chr19	8947260	8947260	G	A	exonic	MUC16	.	nonsynonymous SNV	MUC16:NM_024690:exon3:c.C29510T:p.T9837I,	exonic	MUC16	.	nonsynonymous SNV	MUC16:ENST00000397910.8:exon3:c.C29510T:p.T9837I,	exonic	MUC16	.	nonsynonymous SNV	MUC16:ENST00000397910.8:exon3:c.C29510T:p.T9837I,	rs192043112	0.00139776	.	.	.	0.0031	0.004	0.0005	0.0002	0.0006	.	.	.	.	.	.	D	T	0.0016	0.0016	0.0002	0	0.0165	0	0.0003	0	0.0020	0	D	0.828
chr19	8964345	8964345	G	A	exonic	MUC16	.	nonsynonymous SNV	MUC16:NM_024690:exon3:c.C12425T:p.P4142L,	exonic	MUC16	.	nonsynonymous SNV	MUC16:ENST00000397910.8:exon3:c.C12425T:p.P4142L,	exonic	MUC16	.	nonsynonymous SNV	MUC16:ENST00000397910.8:exon3:c.C12425T:p.P4142L,	rs17000819	0.033147	0.0008	0.036	0.001	0.0102	0.128	0.0019	0.0022	0.0018	.	.	.	.	.	.	T	T	0.0146	0.0146	0.0015	0.0403	0.1183	0	0.0023	0.0111	0.0062	0	D	0.97
chr19	8973268	8973268	G	A	exonic	MUC16	.	nonsynonymous SNV	MUC16:NM_024690:exon1:c.C7871T:p.T2624M,	exonic	MUC16	.	nonsynonymous SNV	MUC16:ENST00000397910.8:exon1:c.C7871T:p.T2624M,	exonic	MUC16	.	nonsynonymous SNV	MUC16:ENST00000397910.8:exon1:c.C7871T:p.T2624M,	rs144088703	0.00159744	.	.	0.002	0.001	0.005	0.0006	.	0.0008	.	.	.	.	.	.	D	T	0.0024	0.0024	0.0001	0	0.0053	0.0218	0.0012	0.0078	0.0006	0	D	1.0
chr19	9093608	9093608	C	T	exonic	OR1M1	.	nonsynonymous SNV	OR1M1:NM_001004456:exon1:c.C364T:p.R122W,	exonic	OR1M1	.	nonsynonymous SNV	OR1M1:ENST00000429566.3:exon1:c.C364T:p.R122W	exonic	OR1M1	.	nonsynonymous SNV	OR1M1:ENST00000429566.3:exon1:c.C364T:p.R122W,	rs185062607	0.000399361	.	.	0.002	.	.	0.0008	0.0005	0.0010	.	.	.	.	.	.	D	T	0.0007	0.0007	0.0002	0.0002	0	0.0012	0.0012	0	0	0	D	1.0
chr19	9413582	9413582	G	A	exonic	ZNF266	.	nonsynonymous SNV	ZNF266:NM_001370390:exon8:c.C1343T:p.S448F	exonic	ZNF266	.	nonsynonymous SNV	ZNF266:ENST00000592292.5:exon8:c.C1343T:p.S448F	exonic	ZNF266	.	nonsynonymous SNV	ZNF266:ENST00000592292.5:exon8:c.C1343T:p.S448F	rs771981923	.	.	.	.	.	.	.	.	.	.	.	.	.	.	.	.	T	8.243e-06	8.243e-06	0	0	0.0001	0	0	0	0	0.25	T	0.922
chr19	11723076	11723076	G	C	exonic	ZNF823	.	nonsynonymous SNV	ZNF823:NM_017507:exon3:c.C326G:p.T109R	exonic	ENST00000341191.10;ZNF823	.	nonsynonymous SNV	ZNF823:ENST00000431998.1:exon3:c.C326G:p.T109R	exonic	ZNF823	.	unknown	UNKNOWN,	rs117644723	0.00838658	.	0.0058	0.0109	0.0276	.	0.0074	0.0023	0.01	.	.	.	.	.	.	T	T	0.0090	0.009	0.0024	0.0030	0.0001	0.0053	0.0099	0.0055	0.0200	0.61	T	0.975
chr19	11948884	11948884	T	G	exonic	ZNF700	.	nonsynonymous SNV	ZNF700:NM_001271848:exon4:c.T869G:p.F290C	exonic	ENST00000254321.9;ZNF700	.	nonsynonymous SNV	ZNF700:ENST00000482090.1:exon3:c.T806G:p.F269C	exonic	ZNF700	.	nonsynonymous SNV	ZNF700:ENST00000482090.1:exon3:c.T806G:p.F269C	rs75607624	0.00798722	.	0.0461	.	.	0.0079	0.0002	0.0002	0.0001	.	.	.	.	.	.	D	T	0.0086	0.0086	0.0011	0.0770	0.0146	0	0.0001	0.0067	0.0002	0	D	1.0
chr19	12828763	12828763	C	T	exonic	RTBDN	.	nonsynonymous SNV	RTBDN:NM_001080997:exon4:c.G259A:p.E87K	exonic	RTBDN	.	nonsynonymous SNV	RTBDN:ENST00000393233.6:exon4:c.G259A:p.E87K	exonic	RTBDN	.	nonsynonymous SNV	RTBDN:ENST00000393233.6:exon4:c.G259A:p.E87K	rs140282871	0.000199681	.	.	0.001	.	.	0.0002	.	0.0002	.	.	.	.	.	.	D	T	0.0011	0.0011	0	0	0	0.0070	0.0012	0.0022	6.062e-05	0.21	T	0.974
chr19	13927942	13927942	G	A	exonic	CC2D1A	.	nonsynonymous SNV	CC2D1A:NM_017721:exon23:c.G2366A:p.R789Q,	exonic	CC2D1A	.	nonsynonymous SNV	CC2D1A:ENST00000318003.11:exon23:c.G2366A:p.R789Q	exonic	CC2D1A	.	nonsynonymous SNV	CC2D1A:ENST00000318003.11:exon23:c.G2366A:p.R789Q	rs201236023	0.000399361	.	.	0.001	0.001	.	.	.	.	.	.	.	.	.	.	D	T	9.197e-05	9.197e-05	0	0	0.0001	0	0.0001	0.0023	6.061e-05	0.17	T	1.0
chr19	15179123	15179123	T	C	exonic	NOTCH3	.	nonsynonymous SNV	NOTCH3:NM_000435:exon22:c.A3620G:p.N1207S,	exonic	ENST00000263388.6;NOTCH3	.	nonsynonymous SNV	NOTCH3:ENST00000601011.1:exon21:c.A3461G:p.N1154S	exonic	NOTCH3	.	unknown	UNKNOWN,	rs141418355	.	.	.	.	.	.	0.0002	0.0002	0.0001	.	.	.	.	.	.	D	T	4.172e-05	4.172e-05	0.0002	0	0.0001	0	3.041e-05	0	0	0	D	1.0
chr19	20625130	20625131	TC	-	exonic	ZNF626	.	frameshift deletion	ZNF626:NM_001076675:exon4:c.746_747del:p.R249Kfs*11,	exonic	ENST00000601440.5;ZNF626	.	frameshift deletion	ENST00000601440.5:ENST00000601440.5:exon4:c.746_747del:p.R249Kfs*11	exonic	ZNF626	.	frameshift deletion	ZNF626:ENST00000612591.4:exon4:c.746_747del:p.R249Kfs*11,	rs533816037	0.00159744	.	.	.	.	0.0079	0.0022	0.0031	0.0018	.	.	.	.	.	.	.	.	0.0007	0.0007	0	0	0.0092	0	1.52e-05	0	0.0001	.	.	.
chr19	20806897	20806897	G	T	exonic	ZNF66	.	nonsynonymous SNV	ZNF66:NM_001355197:exon4:c.G1297T:p.A433S,	exonic	ENST00000344519.8	.	nonsynonymous SNV	ENST00000344519.8:ENST00000344519.8:exon4:c.G1297T:p.A433S,	exonic	ZNF66	.	unknown	UNKNOWN,	rs138771709	0.0133786	.	.	0.004	.	0.0625	.	.	.	.	.	.	.	.	.	.	T	0.0068	0.0068	0	0.0003	0.0691	0.0157	0.0009	0.0070	0.0019	.	.	.
chr19	21183726	21183726	A	G	exonic	ZNF431	.	nonsynonymous SNV	ZNF431:NM_001319124:exon5:c.A1426G:p.K476E	exonic	ZNF431	.	nonsynonymous SNV	ZNF431:ENST00000311048.11:exon5:c.A1423G:p.K475E,	exonic	ZNF431	.	nonsynonymous SNV	ZNF431:ENST00000311048.11:exon5:c.A1423G:p.K475E,	rs200898803	0.000199681	.	.	.	.	0.001	.	.	.	.	.	.	.	.	.	D	T	1.693e-05	1.693e-05	0	0	0.0001	0	1.537e-05	0	0	0.05	D	0.825
chr19	22976598	22976598	T	C	exonic	ZNF728	.	nonsynonymous SNV	ZNF728:NM_001267716:exon4:c.A739G:p.K247E,	exonic	ENST00000594710.1	.	nonsynonymous SNV	ENST00000594710.1:ENST00000594710.1:exon4:c.A739G:p.K247E,	exonic	ZNF728	.	nonsynonymous SNV	ZNF728:ENST00000594710.1:exon4:c.A739G:p.K247E,	rs2116933	0.00638978	.	0.0058	0.0229	0.0041	0.001	.	.	.	.	.	.	.	.	.	.	T	0.0143	0.0143	0.0039	0.0062	0.0001	0.0072	0.0215	0.0158	0.0071	.	.	.
chr19	23145949	23145949	-	T	exonic	ZNF730	.	stopgain	ZNF730:NM_001277403:exon4:c.906dupT:p.K303*,	exonic	ENST00000597761.6	.	stopgain	ENST00000597761.6:ENST00000597761.6:exon4:c.906dupT:p.K303*,	exonic	ZNF730	.	unknown	UNKNOWN,	rs529180941	0.00319489	.	.	0.007	0.0092	.	.	.	.	.	.	.	.	.	.	.	.	0.0039	0.0039	0.0001	0.0018	0	0.0006	0.0045	0	0.0084	.	.	.
chr19	33117879	33117879	A	T	exonic	GPATCH1	.	nonsynonymous SNV	GPATCH1:NM_018025:exon16:c.A2251T:p.M751L,	exonic	ENST00000170564.6	.	nonsynonymous SNV	ENST00000170564.6:ENST00000170564.6:exon16:c.A2251T:p.M751L,	exonic	GPATCH1	.	nonsynonymous SNV	GPATCH1:ENST00000170564.6:exon16:c.A2251T:p.M751L,	rs201482751	0.000199681	.	.	.	0.001	.	0.0002	.	0.0002	.	.	.	.	.	.	D	T	9.062e-05	9.062e-05	0	0	0	0	5.994e-05	0	0.0004	0.28	T	0.959
chr19	34759786	34759787	AG	-	exonic	ZNF599	.	stopgain	ZNF599:NM_001007248:exon4:c.1014_1015del:p.Y339*,	exonic	ENST00000329285.12	.	stopgain	ENST00000329285.12:ENST00000329285.12:exon4:c.1014_1015del:p.Y339*,	exonic	ZNF599	.	unknown	UNKNOWN,	rs148227520	0.00878594	0.0015	0.0058	0.0099	0.0266	0.002	0.0084	0.0028	0.0113	ID=COSM328007;OCCURENCE=1(pancreas)	.	.	.	.	.	.	.	0.0119	0.0119	0.0027	0.0042	0.0001	0.0101	0.0113	0.0044	0.0330	.	.	.
chr19	35788043	35788043	C	T	exonic	ARHGAP33	.	nonsynonymous SNV	ARHGAP33:NM_001172630:exon21:c.C2986T:p.R996W	exonic	ARHGAP33	.	nonsynonymous SNV	ARHGAP33:ENST00000314737.9:exon21:c.C2995T:p.R999W	exonic	ARHGAP33	.	nonsynonymous SNV	ARHGAP33:ENST00000314737.9:exon21:c.C2995T:p.R999W	rs140331892	0.000599042	.	.	0.003	.	.	0.0018	0.0005	0.0024	.	.	.	.	.	.	D	T	0.0025	0.0025	0.0002	0.0005	0	0.0108	0.0033	0.0023	0.0001	0.01	D	0.998
chr19	35849285	35849285	G	C	exonic	NPHS1	.	nonsynonymous SNV	NPHS1:NM_004646:exon7:c.C791G:p.P264R,	exonic	NPHS1	.	nonsynonymous SNV	NPHS1:ENST00000353632.6:exon7:c.C791G:p.P264R	exonic	NPHS1	.	nonsynonymous SNV	NPHS1:ENST00000353632.6:exon7:c.C791G:p.P264R	rs34982899	0.0107827	0.0204	0.0086	0.0169	0.0041	.	0.0160	0.0166	0.0157	.	195679	not_specified|not_provided	MedGen:CN169374|MedGen:CN517202	criteria_provided,_multiple_submitters,_no_conflicts	Benign	D	T	0.0143	0.0143	0.0227	0.0082	0	0.0303	0.0156	0.0227	0.0091	0.24	T	0.675
chr19	36006598	36006598	C	T	exonic	SYNE4	.	nonsynonymous SNV	SYNE4:NM_001297735:exon3:c.G353A:p.G118E	exonic	ENST00000324444.8;ENST00000645695.1;SYNE4	.	nonsynonymous SNV	SYNE4:ENST00000340477.9:exon3:c.G353A:p.G118E	exonic	SYNE4	.	nonsynonymous SNV	SYNE4:ENST00000340477.9:exon3:c.G353A:p.G118E,	rs747417297	.	.	.	.	.	.	.	.	.	.	.	.	.	.	.	D	T	0.0001	0.0001	0	0	0	0	0.0002	0	0	0.24	T	1.0
chr19	36039703	36039703	G	A	exonic	THAP8	.	stopgain	THAP8:NM_001331102:exon3:c.C292T:p.R98X	exonic	ENST00000292894.1;THAP8	.	stopgain	ENST00000292894.1:ENST00000292894.1:exon3:c.C292T:p.R98X,	exonic	THAP8	.	stopgain	THAP8:ENST00000292894.1:exon3:c.C292T:p.R98X,	rs201068048	0.000399361	.	0.0014	.	0.001	.	8.4e-05	.	0.0001	.	.	.	.	.	.	.	.	0.0014	0.0014	0	0	0	0	0.0014	0	0.0044	1	T	.
chr19	39914176	39914176	C	T	exonic	FCGBP	.	nonsynonymous SNV	FCGBP:NM_003890:exon6:c.G2911A:p.V971M,	exonic	ENST00000641975.1	.	nonsynonymous SNV	ENST00000641975.1:ENST00000641975.1:exon6:c.G2911A:p.V971M,	exonic	FCGBP	.	unknown	UNKNOWN,	rs35922811	0.00778754	0.0015	0.0202	0.0219	0.001	.	0.0157	0.0032	0.0221	.	.	.	.	.	.	.	.	0.0131	0.0131	0.0028	0.0119	0	0.0032	0.0200	0.0077	0.0038	0.02	D	0.999
chr19	40214146	40214146	C	T	exonic	MAP3K10	.	nonsynonymous SNV	MAP3K10:NM_002446:exon9:c.C2467T:p.R823C,	exonic	ENST00000253055.7	.	nonsynonymous SNV	ENST00000253055.7:ENST00000253055.7:exon9:c.C2467T:p.R823C,	exonic	MAP3K10	.	unknown	UNKNOWN,	rs185662948	0.000599042	.	.	.	0.001	0.002	.	.	.	.	.	.	.	.	.	T	T	0.0014	0.0014	0	0	0.0022	0.0156	0.0020	0	0.0001	0.08	T	1.0
chr19	40394145	40394145	C	T	exonic	PRX	.	nonsynonymous SNV	PRX:NM_181882:exon7:c.G4207A:p.V1403I,	exonic	PRX	.	nonsynonymous SNV	PRX:ENST00000324001.7:exon7:c.G4207A:p.V1403I,	exonic	PRX	.	nonsynonymous SNV	PRX:ENST00000324001.7:exon7:c.G4207A:p.V1403I,	rs139051512	.	.	.	.	.	.	0.0002	.	0.0003	ID=COSM996675;OCCURENCE=1(endometrium)	470216	Charcot-Marie-Tooth_disease_type_4	MedGen:C4082197,Orphanet:ORPHA64749,SNOMED_CT:715795005	criteria_provided,_single_submitter	Uncertain_significance	T	T	3.448e-05	3.448e-05	0	8.687e-05	0	0	4.61e-05	0	0	0.08	T	0.586
chr19	41237944	41237944	G	A	exonic	AXL	.	nonsynonymous SNV	AXL:NM_001699:exon7:c.G784A:p.A262T	exonic	AXL;ENST00000301178.8	.	nonsynonymous SNV	ENST00000301178.8:ENST00000301178.8:exon7:c.G784A:p.A262T	exonic	AXL	.	nonsynonymous SNV	AXL:ENST00000359092.7:exon7:c.G784A:p.A262T,	rs139491068	0.000199681	.	.	0.001	.	.	0.0002	.	0.0003	.	728203	not_provided	MedGen:CN517202	criteria_provided,_single_submitter	Benign	D	T	0.0014	0.0014	0	0	0	0.0093	0.0015	0.0089	0	.	.	0.739
chr19	43554699	43554699	C	T	exonic	XRCC1	.	nonsynonymous SNV	XRCC1:NM_006297:exon4:c.G361A:p.A121T,	exonic	L34079.1;XRCC1	.	nonsynonymous SNV	XRCC1:ENST00000543982.5:exon3:c.G268A:p.A90T	exonic	L34079.2;XRCC1	.	nonsynonymous SNV	XRCC1:ENST00000543982.5:exon3:c.G268A:p.A90T	rs138284081	0.000798722	0.0015	0.0014	.	.	0.001	0.0006	0.0018	.	.	.	.	.	.	.	D	T	0.0003	0.0003	0.0019	0.0002	0.0006	0	6.077e-05	0	6.083e-05	0.16	T	0.999
chr19	44010421	44010421	G	T	exonic	ZNF230	.	nonsynonymous SNV	ZNF230:NM_006300:exon5:c.G382T:p.A128S,	exonic	ENST00000429154.6	.	nonsynonymous SNV	ENST00000429154.6:ENST00000429154.6:exon5:c.G382T:p.A128S,	exonic	ZNF230	.	unknown	UNKNOWN,	rs144948923	0.000399361	.	.	0.001	0.001	.	0.0018	.	0.0028	.	.	.	.	.	.	T	T	0.0016	0.0016	9.61e-05	0.0014	0	0.0015	0.0023	0.0022	0.0006	0.66	T	0.862
chr19	44942329	44942329	G	A	exonic	APOC4	.	nonsynonymous SNV	APOC4:NM_001646:exon1:c.G52A:p.V18M,	exonic	APOC4;APOC4-APOC2;ENST00000592954.1	.	nonsynonymous SNV	APOC4-APOC2:ENST00000585685.5:exon1:c.G52A:p.V18M	exonic	APOC4;APOC4-APOC2	.	nonsynonymous SNV	APOC4-APOC2:ENST00000589057.5:exon1:c.G52A:p.V18M	rs13306210	0.00698882	.	.	0.005	0.001	0.0288	0.0002	.	0.0003	.	.	.	.	.	.	.	T	0.0053	0.0053	0	0.0004	0.0392	0.0216	0.0021	0.0167	0.0005	0.01	D	0.998
chr19	46494898	46494898	C	A	exonic	PNMA8B	.	nonsynonymous SNV	PNMA8B:NM_020709:exon1:c.G568T:p.A190S,	exonic	ENST00000599531.1	.	nonsynonymous SNV	ENST00000599531.1:ENST00000599531.1:exon1:c.G568T:p.A190S,	exonic	PNMAL2	.	nonsynonymous SNV	PNMAL2:ENST00000599531.1:exon1:c.G568T:p.A190S,	rs770895935	.	.	.	.	.	.	.	.	.	.	.	.	.	.	.	.	T	2.476e-05	2.476e-05	0	0	0	0	3.004e-05	0	6.058e-05	0.16	T	0.698
chr19	48137550	48137550	C	T	exonic	LIG1	.	nonsynonymous SNV	LIG1:NM_001289064:exon11:c.G1022A:p.R341H	exonic	ENST00000263274.11;LIG1	.	nonsynonymous SNV	LIG1:ENST00000536218.5:exon11:c.G1022A:p.R341H	exonic	LIG1	.	nonsynonymous SNV	LIG1:ENST00000536218.5:exon11:c.G1022A:p.R341H	rs4987068	0.0081869	.	0.0014	0.0268	0.0133	.	0.0148	0.0041	0.0202	.	.	.	.	.	.	D	T	0.0139	0.0139	0.0034	0.0049	0	0.0076	0.0191	0.0115	0.0156	0.54	T	0.786
chr19	48375676	48375676	C	T	exonic	SYNGR4	.	nonsynonymous SNV	SYNGR4:NM_012451:exon4:c.C395T:p.P132L,	exonic	ENST00000344846.6;SYNGR4	.	nonsynonymous SNV	SYNGR4:ENST00000600863.5:exon3:c.C248T:p.P83L	exonic	SYNGR4	.	nonsynonymous SNV	SYNGR4:ENST00000601610.5:exon3:c.C248T:p.P83L	rs34058038	0.00319489	.	.	0.0099	0.0061	.	0.0037	0.0005	0.0053	.	.	.	.	.	.	T	T	0.0062	0.0062	0.0005	0.0027	0	0.0221	0.0069	0.0143	0.0062	0.09	T	0.806
chr19	49427095	49427095	C	A	exonic	GFY	.	nonsynonymous SNV	GFY:NM_001195256:exon1:c.C665A:p.T222N,	exonic	GFY	.	nonsynonymous SNV	GFY:ENST00000610896.1:exon1:c.C665A:p.T222N	exonic	GFY	.	nonsynonymous SNV	GFY:ENST00000610896.1:exon1:c.C665A:p.T222N	rs117785585	0.00299521	0.0015	0.0014	0.0119	.	.	.	.	.	.	.	.	.	.	.	.	.	0.0025	0.0025	0.0018	0	0	0.25	0.0075	0	0.0003	.	.	.
chr19	51079551	51079551	G	A	exonic	KLK14	.	nonsynonymous SNV	KLK14:NM_001369775:exon4:c.C364T:p.R122W	exonic	KLK14	.	nonsynonymous SNV	KLK14:ENST00000650543.1:exon4:c.C364T:p.R122W	exonic	KLK14	.	nonsynonymous SNV	KLK14:ENST00000391802.1:exon5:c.C412T:p.R138W,	rs112658494	0.00419329	0.0008	0.0086	0.006	0.0072	0.001	0.0075	0.0027	0.0098	.	.	.	.	.	.	T	D	0.0083	0.0083	0.0025	0.0072	0.0001	0.0060	0.0102	0.0084	0.0102	0	D	0.998
chr19	51382453	51382453	C	T	exonic	LIM2	.	nonsynonymous SNV	LIM2:NM_001161748:exon3:c.G290A:p.R97Q	exonic	LIM2	.	nonsynonymous SNV	LIM2:ENST00000221973.7:exon3:c.G416A:p.R139Q	exonic	LIM2	.	nonsynonymous SNV	LIM2:ENST00000221973.7:exon3:c.G416A:p.R139Q	rs139708014	.	.	.	.	.	.	0.0002	0.0005	.	.	.	.	.	.	.	D	D	3.296e-05	3.296e-05	9.625e-05	0	0.0002	0	0	0	6.056e-05	0.03	D	1.0
chr19	52841639	52841639	G	A	exonic	ZNF468	.	stopgain	ZNF468:NM_001008801:exon4:c.C655T:p.Q219X,	exonic	ENST00000595646.5	.	stopgain	ENST00000595646.5:ENST00000595646.5:exon4:c.C655T:p.Q219X,	exonic	ZNF468	.	unknown	UNKNOWN,	rs746796681	.	.	.	.	.	.	.	.	.	.	.	.	.	.	.	.	.	9.9e-05	9.9e-05	0	0	0.0012	0	1.501e-05	0	6.06e-05	0.05	D	.
chr19	52845281	52845281	A	G	exonic	ZNF468	.	nonsynonymous SNV	ZNF468:NM_001277120:exon4:c.T158C:p.I53T,	exonic	ZNF468	.	nonsynonymous SNV	ZNF468:ENST00000601847.1:exon2:c.T50C:p.I17T	exonic	ZNF468	.	nonsynonymous SNV	ZNF468:ENST00000396409.5:exon3:c.T158C:p.I53T	rs73069429	0.0880591	0.0983	0.098	0.0815	0.1125	0.0506	.	.	.	.	.	.	.	.	.	.	T	0	0	.	.	.	.	0	.	.	.	.	.
chr19	52950007	52950007	C	G	exonic	ZNF816	.	nonsynonymous SNV	ZNF816:NM_001202456:exon4:c.G1768C:p.E590Q	exonic	ZNF816	.	nonsynonymous SNV	ZNF816:ENST00000444460.6:exon4:c.G1768C:p.E590Q	exonic	ZNF816	.	nonsynonymous SNV	ZNF816:ENST00000444460.6:exon4:c.G1768C:p.E590Q	rs61740548	0.00638978	.	0.0216	0.0089	.	0.0079	0.0004	0.0002	0.0005	.	.	.	.	.	.	D	T	0.0043	0.0043	0.0004	0.0124	0.0084	0.0245	0.0018	0.0121	0.0006	0.02	D	0.993
chr19	53803958	53803958	G	C	exonic	NLRP12	.	nonsynonymous SNV	NLRP12:NM_001277126:exon6:c.C2582G:p.T861S	exonic	NLRP12	.	nonsynonymous SNV	NLRP12:ENST00000324134.10:exon6:c.C2579G:p.T860S	exonic	NLRP12	.	nonsynonymous SNV	NLRP12:ENST00000324134.10:exon6:c.C2579G:p.T860S	rs150671525	0.000798722	.	.	0.004	.	.	0.0007	.	0.0010	.	344082	Familial_cold_autoinflammatory_syndrome|not_provided	MedGen:C0343068|MedGen:CN517202	criteria_provided,_multiple_submitters,_no_conflicts	Likely_benign	T	T	0.0007	0.0007	0	0.0002	0	0.0011	0.0010	0.0022	6.075e-05	0.62	T	0.728
chr19	53810880	53810880	G	A	exonic	NLRP12	.	nonsynonymous SNV	NLRP12:NM_001277126:exon3:c.C779T:p.T260M	exonic	NLRP12	.	nonsynonymous SNV	NLRP12:ENST00000324134.10:exon3:c.C779T:p.T260M	exonic	NLRP12	.	nonsynonymous SNV	NLRP12:ENST00000324134.10:exon3:c.C779T:p.T260M	rs150280940	0.000399361	.	.	0.001	0.001	.	0.0002	0.0002	0.0001	.	350326	Familial_cold_autoinflammatory_syndrome|not_provided	MedGen:C0343068|MedGen:CN517202	criteria_provided,_conflicting_interpretations	Conflicting_interpretations_of_pathogenicity	D	T	0.0007	0.0007	9.653e-05	8.664e-05	0.0001	0	0.0005	0.0011	0.0025	0.04	D	0.864
chr19	54191791	54191791	G	A	exonic	TSEN34	.	nonsynonymous SNV	TSEN34:NM_001077446:exon2:c.G314A:p.R105Q	exonic	ENST00000396388.2;ENST00000456872.5;TSEN34	.	nonsynonymous SNV	ENST00000396388.2:ENST00000396388.2:exon2:c.G314A:p.R105Q	exonic	TSEN34	.	nonsynonymous SNV	TSEN34:ENST00000302937.8:exon3:c.G314A:p.R105Q	rs138586360	0.00119808	.	.	.	.	0.006	.	.	.	.	.	.	.	.	.	D	T	0.0007	0.0007	0	0	0.0088	0	0	0	0.0002	0.1	T	1.0
chr19	54364797	54364797	G	A	exonic	LAIR1	.	nonsynonymous SNV	LAIR1:NM_001289023:exon1:c.C8T:p.P3L	exonic	ENST00000391742.6;LAIR1	.	nonsynonymous SNV	LAIR1:ENST00000348231.8:exon1:c.C8T:p.P3L	exonic	LAIR1	.	nonsynonymous SNV	LAIR1:ENST00000348231.8:exon1:c.C8T:p.P3L	rs118046758	0.00658946	0.0008	0.0115	0.0169	0.0072	.	0.0140	0.0025	0.0199	.	.	.	.	.	.	D	T	0.0132	0.0132	0.0024	0.0056	0	0.0192	0.0186	0.0089	0.0082	0	D	0.818
chr19	54662951	54662951	G	A	exonic	LILRB4	.	nonsynonymous SNV	LILRB4:NM_001278429:exon1:c.G41A:p.R14Q,	exonic	LILRB4	.	nonsynonymous SNV	LILRB4:ENST00000270452.6:exon2:c.G41A:p.R14Q	UTR5	LILRB4	ENST00000391736.5:c.-83G>A	.	.	rs781739286	.	.	.	.	.	.	.	.	.	.	.	.	.	.	.	.	.	8.423e-06	8.423e-06	0	0	0	0	0	0	6.079e-05	0.49	T	0.957
chr19	55384220	55384220	G	A	exonic	TMEM238	.	nonsynonymous SNV	TMEM238:NM_001190764:exon1:c.C40T:p.P14S,	exonic	ENST00000444469.3	.	nonsynonymous SNV	ENST00000444469.3:ENST00000444469.3:exon1:c.C40T:p.P14S,	exonic	TMEM238	.	nonsynonymous SNV	TMEM238:ENST00000444469.3:exon1:c.C40T:p.P14S,	rs1870074	0.667133	0.177	0.7277	0.8579	0.863	0.8879	.	.	.	.	705264	not_provided	MedGen:CN517202	criteria_provided,_single_submitter	Benign	T	.	0	0	.	.	.	.	.	.	.	0.26	T	.
chr19	57443816	57443816	C	G	exonic	ZNF749	.	nonsynonymous SNV	ZNF749:NM_001321953:exon2:c.C407G:p.P136R	exonic	ENST00000334181.4	.	nonsynonymous SNV	ENST00000334181.4:ENST00000334181.4:exon3:c.C668G:p.P223R,	exonic	ZNF749	.	unknown	UNKNOWN,	rs149525702	0.000399361	.	0.0014	0.001	.	.	0.0005	.	0.0008	.	.	.	.	.	.	T	T	0.0007	0.0007	0	0.0038	0	0	0.0005	0.0066	0.0003	0.02	D	0.995
chr2	10607301	10607301	G	C	exonic	NOL10	.	nonsynonymous SNV	NOL10:NM_001261392:exon13:c.C959G:p.P320R	exonic	ENST00000381685.9;NOL10	.	nonsynonymous SNV	NOL10:ENST00000345985.7:exon13:c.C887G:p.P296R	exonic	NOL10	.	nonsynonymous SNV	NOL10:ENST00000345985.7:exon13:c.C887G:p.P296R	rs775608041	.	.	.	.	.	.	.	.	.	.	.	.	.	.	.	D	T	1.891e-05	1.891e-05	0	0	0.0003	0	0	0	0	0.01	D	0.999
chr2	27137666	27137666	G	A	exonic	PRR30	.	nonsynonymous SNV	PRR30:NM_178553:exon3:c.C664T:p.R222C,	exonic	PRR30	.	nonsynonymous SNV	PRR30:ENST00000335524.7:exon3:c.C664T:p.R222C	exonic	PRR30	.	nonsynonymous SNV	PRR30:ENST00000335524.7:exon3:c.C664T:p.R222C,	rs3739097	0.0183706	.	0.0115	0.002	0.002	0.0794	.	.	.	.	.	.	.	.	.	D	T	0.0079	0.0079	0.0006	0.0150	0.0772	0.0040	0.0004	0.0105	0.0012	0	D	1.0
chr2	37359593	37359593	G	A	exonic	QPCT	.	nonsynonymous SNV	QPCT:NM_012413:exon3:c.G281A:p.R94Q,	exonic	ENST00000338415.7;QPCT	.	nonsynonymous SNV	QPCT:ENST00000404976.5:exon2:c.G134A:p.R45Q	exonic	QPCT	.	unknown	UNKNOWN,	rs116518028	0.000399361	.	.	.	.	0.002	.	.	.	ID=COSM1408002;OCCURENCE=1(large_intestine)	.	.	.	.	.	T	T	0.0003	0.0003	0	0.0006	0.0021	0	9.012e-05	0	0.0003	0.37	T	1.0
chr2	39229418	39229418	C	T	exonic	CDKL4	.	nonsynonymous SNV	CDKL4:NM_001009565:exon1:c.G115A:p.E39K	exonic	CDKL4	.	nonsynonymous SNV	CDKL4:ENST00000378803.5:exon1:c.G115A:p.E39K	exonic	CDKL4	.	nonsynonymous SNV	CDKL4:ENST00000378803.5:exon1:c.G115A:p.E39K	rs141333215	0.000199681	.	.	0.001	.	.	0.0010	0.0002	0.0014	.	.	.	.	.	.	D	T	0.0007	0.0007	0.0002	0	0	0.0002	0.0012	0.0011	0	0.04	D	1.0
chr2	47804959	47804959	A	T	exonic	MSH6	.	nonsynonymous SNV	MSH6:NM_001281492:exon4:c.A3098T:p.E1033V	exonic	MSH6	.	nonsynonymous SNV	MSH6:ENST00000540021.5:exon4:c.A3098T:p.E1033V	exonic	MSH6	.	nonsynonymous SNV	MSH6:ENST00000540021.5:exon4:c.A3098T:p.E1033V	rs63750252	0.00279553	.	.	.	.	0.0139	.	.	.	.	94874	Hereditary_cancer-predisposing_syndrome|Lynch_syndrome|not_specified|not_provided	MedGen:C0027672,SNOMED_CT:699346009|MedGen:C1333990,Orphanet:ORPHA144|MedGen:CN169374|MedGen:CN517202	reviewed_by_expert_panel	Likely_benign	D	D	0.0012	0.0012	0	8.667e-05	0.0138	0	7.496e-05	0.0022	0.0010	0.17	T	0.67
chr2	48581744	48581744	G	C	exonic	STON1;STON1-GTF2A1L	.	nonsynonymous SNV	STON1-GTF2A1L:NM_001198594:exon1:c.G1111C:p.D371H	exonic	STON1;STON1-GTF2A1L	.	nonsynonymous SNV	STON1-GTF2A1L:ENST00000394751.5:exon1:c.G1111C:p.D371H	exonic	STON1;STON1-GTF2A1L	.	nonsynonymous SNV	STON1-GTF2A1L:ENST00000394751.5:exon1:c.G1111C:p.D371H	rs148255611	0.000399361	.	.	0.002	.	.	0.0015	0.0002	0.0021	.	.	.	.	.	.	D	T	0.0011	0.0011	9.754e-05	0.0003	0	0.0014	0.0019	0.0011	0	0	D	0.993
chr2	71134774	71134774	T	G	exonic	MPHOSPH10	.	nonsynonymous SNV	MPHOSPH10:NM_005791:exon4:c.T1075G:p.S359A,	exonic	ENST00000244230.6;MPHOSPH10	.	nonsynonymous SNV	ENST00000244230.6:ENST00000244230.6:exon4:c.T1075G:p.S359A	exonic	MPHOSPH10	.	nonsynonymous SNV	MPHOSPH10:ENST00000498451.2:exon4:c.T1075G:p.S359A,	rs144162265	0.00279553	.	.	.	.	0.0139	.	.	.	.	.	.	.	.	.	D	T	0.0020	0.002	0	8.648e-05	0.0249	0	3.015e-05	0.0033	0.0013	0.43	T	0.997
chr2	73558995	73558995	G	A	exonic	ALMS1	.	nonsynonymous SNV	ALMS1:NM_015120:exon15:c.G10237A:p.E3413K,	exonic	ALMS1;ENST00000613296.4	.	nonsynonymous SNV	ALMS1:ENST00000484298.5:exon14:c.G10111A:p.E3371K	exonic	ALMS1	.	nonsynonymous SNV	ALMS1:ENST00000484298.5:exon14:c.G10111A:p.E3371K	rs770477965	.	.	.	.	.	.	.	.	.	.	.	.	.	.	.	.	.	8.306e-06	8.306e-06	0	0	0	0	0	0.0011	0	0.27	T	0.784
chr2	84579629	84579629	A	G	exonic	DNAH6	.	nonsynonymous SNV	DNAH6:NM_001370:exon14:c.A2179G:p.T727A,	exonic	DNAH6	.	nonsynonymous SNV	DNAH6:ENST00000237449.10:exon13:c.A2179G:p.T727A	exonic	DNAH6	.	nonsynonymous SNV	DNAH6:ENST00000237449.10:exon13:c.A2179G:p.T727A	rs140577999	0.000599042	.	.	0.003	.	.	0.0019	.	0.0029	.	.	.	.	.	.	T	T	0.0022	0.0022	9.669e-05	8.676e-05	0	0.0067	0.0032	0.0034	0	0.16	T	1.0
chr2	84841902	84841902	C	T	exonic	TRABD2A	.	nonsynonymous SNV	TRABD2A:NM_001277053:exon3:c.G775A:p.G259R	exonic	ENST00000409520.6;TRABD2A	.	nonsynonymous SNV	TRABD2A:ENST00000409133.1:exon3:c.G775A:p.G259R	exonic	TRABD2A	.	nonsynonymous SNV	TRABD2A:ENST00000409133.1:exon3:c.G775A:p.G259R,	rs201711793	.	.	.	.	.	.	.	.	.	.	.	.	.	.	.	D	T	0.0004	0.0004	0	0	0.0021	0	0.0010	0	0	0	D	1.0
chr2	85350975	85350975	A	-	exonic	RETSAT	.	frameshift deletion	RETSAT:NM_017750:exon3:c.402delT:p.F134Lfs*62,	exonic	ENST00000295802.8;RETSAT	.	frameshift deletion	ENST00000295802.8:ENST00000295802.8:exon3:c.402delT:p.F134Lfs*62,	exonic	RETSAT	.	unknown	UNKNOWN,	rs534908680	0.00219649	.	0.0014	0.002	0.001	0.0069	0.0012	0.0002	0.0017	.	.	.	.	.	.	.	.	0.0025	0.0025	0.0002	8.64e-05	0.0047	0.0122	0.0023	0.0099	0.0015	.	.	.
chr2	85390187	85390187	G	A	exonic	ELMOD3	.	nonsynonymous SNV	ELMOD3:NM_001329793:exon11:c.G865A:p.A289T	exonic	ELMOD3;ENST00000409013.7	.	nonsynonymous SNV	ELMOD3:ENST00000315658.11:exon11:c.G865A:p.A289T	exonic	ELMOD3	.	nonsynonymous SNV	ELMOD3:ENST00000315658.11:exon11:c.G865A:p.A289T	rs34973107	0.00319489	0.0008	0.0014	0.0119	0.002	.	0.0091	0.0023	0.0126	.	500359	not_specified|not_provided	MedGen:CN169374|MedGen:CN517202	criteria_provided,_multiple_submitters,_no_conflicts	Benign/Likely_benign	T	T	0.0059	0.0059	0.0012	0.0022	0.0001	0.0006	0.0091	0.0066	0.0039	0.15	T	0.998
chr2	88174647	88174647	G	A	exonic	THNSL2	.	nonsynonymous SNV	THNSL2:NM_018271:exon2:c.G232A:p.D78N	exonic	THNSL2	.	nonsynonymous SNV	THNSL2:ENST00000324166.6:exon2:c.G232A:p.D78N	exonic	THNSL2	.	nonsynonymous SNV	THNSL2:ENST00000324166.6:exon2:c.G232A:p.D78N	rs34841493	0.00599042	0.0015	0.0115	0.0129	0.0072	.	0.0086	0.0023	0.0119	.	.	.	.	.	.	T	T	0.0089	0.0089	0.0019	0.0079	0	0.0044	0.0129	0.0122	0.0040	0.42	T	0.981
chr2	109490906	109490906	G	A	exonic	SH3RF3	.	nonsynonymous SNV	SH3RF3:NM_001099289:exon9:c.G2450A:p.R817H,	exonic	ENST00000309415.7	.	nonsynonymous SNV	ENST00000309415.7:ENST00000309415.7:exon9:c.G2450A:p.R817H,	exonic	SH3RF3	.	nonsynonymous SNV	SH3RF3:ENST00000309415.7:exon9:c.G2450A:p.R817H,	rs140703944	0.00279553	0.0015	0.0014	0.0099	0.001	.	0.0042	0.0007	0.0057	.	.	.	.	.	.	D	T	0.0032	0.0032	0.0007	0.0046	0	0	0.0063	0	0	0.13	T	0.94
chr2	134986803	134986803	G	A	exonic	MAP3K19	.	nonsynonymous SNV	MAP3K19:NM_001018044:exon5:c.C1730T:p.S577L	exonic	ENST00000358371.8;ENST00000437365.1;MAP3K19	.	nonsynonymous SNV	ENST00000437365.1:ENST00000437365.1:exon1:c.C239T:p.S80L	exonic	MAP3K19	.	nonsynonymous SNV	MAP3K19:ENST00000375845.8:exon7:c.C2069T:p.S690L	rs55867035	0.00239617	.	0.0029	0.008	0.002	.	0.0038	0.0011	0.0052	.	.	.	.	.	.	D	T	0.0036	0.0036	0.0012	0.0026	0	0.0008	0.0054	0.0033	0.0018	0	D	1.0
chr2	140701775	140701775	C	T	exonic	LRP1B	.	nonsynonymous SNV	LRP1B:NM_018557:exon40:c.G6373A:p.G2125S,	exonic	LRP1B	.	nonsynonymous SNV	LRP1B:ENST00000389484.7:exon40:c.G6373A:p.G2125S,	exonic	LRP1B	.	nonsynonymous SNV	LRP1B:ENST00000389484.7:exon40:c.G6373A:p.G2125S,	rs147767913	0.000199681	.	.	.	0.001	.	7.7e-05	0.0002	.	ID=COSM245482;OCCURENCE=1(prostate)	.	.	.	.	.	T	D	6.609e-05	6.609e-05	0	0.0002	0	0	7.509e-05	0	6.057e-05	0.49	T	1.0
chr2	151464378	151464378	G	A	exonic	RIF1	.	nonsynonymous SNV	RIF1:NM_001177665:exon29:c.G4858A:p.E1620K	exonic	ENST00000444746.6;RIF1	.	nonsynonymous SNV	RIF1:ENST00000243326.9:exon29:c.G4858A:p.E1620K	exonic	RIF1	.	nonsynonymous SNV	RIF1:ENST00000243326.9:exon29:c.G4858A:p.E1620K	rs61748231	0.00439297	.	.	.	0.001	0.0208	0.0008	.	0.0012	.	.	.	.	.	.	T	T	0.0028	0.0028	0	0.0003	0.0274	0.0002	0.0010	0.0034	0.0013	0.19	T	0.657
chr2	159840760	159840760	G	A	exonic	LY75;LY75-CD302	.	nonsynonymous SNV	LY75-CD302:NM_001198759:exon25:c.C3476T:p.S1159F	exonic	ENST00000263636.4;LY75-CD302	.	nonsynonymous SNV	ENST00000263636.4:ENST00000263636.4:exon25:c.C3476T:p.S1159F	exonic	LY75;LY75-CD302	.	nonsynonymous SNV	LY75-CD302:ENST00000504764.5:exon25:c.C3476T:p.S1159F	rs147904044	0.00119808	.	0.0043	0.003	.	.	0.0041	0.0018	0.0052	.	.	.	.	.	.	D	T	0.0033	0.0033	0.0008	0.0019	0	0.0005	0.0055	0.0022	0.0001	0.13	T	0.98
chr2	159850033	159850033	A	G	exonic	LY75;LY75-CD302	.	nonsynonymous SNV	LY75-CD302:NM_001198759:exon23:c.T3097C:p.Y1033H	exonic	ENST00000263636.4;LY75-CD302	.	nonsynonymous SNV	ENST00000263636.4:ENST00000263636.4:exon23:c.T3097C:p.Y1033H	exonic	LY75;LY75-CD302	.	nonsynonymous SNV	LY75-CD302:ENST00000504764.5:exon23:c.T3097C:p.Y1033H	rs78685880	0.00379393	.	.	.	.	0.0188	7.7e-05	.	0.0001	.	.	.	.	.	.	D	T	0.0021	0.0021	0.0002	0.0004	0.0228	0.0003	0.0005	0.0011	0.0007	0	D	1.0
chr2	159878663	159878663	C	T	exonic	LY75;LY75-CD302	.	nonsynonymous SNV	LY75-CD302:NM_001198759:exon10:c.G1574A:p.G525E	exonic	ENST00000263636.4;LY75-CD302	.	nonsynonymous SNV	ENST00000263636.4:ENST00000263636.4:exon10:c.G1574A:p.G525E	exonic	LY75;LY75-CD302	.	nonsynonymous SNV	LY75-CD302:ENST00000504764.5:exon10:c.G1574A:p.G525E	rs147820690	0.000599042	.	0.0014	0.002	.	.	0.0022	0.0011	0.0027	.	.	.	.	.	.	D	T	0.0018	0.0018	0.0005	0.0005	0	0.0002	0.0031	0.0011	0.0001	0.15	T	1.0
chr2	159904660	159904660	G	C	exonic	LY75;LY75-CD302	.	nonsynonymous SNV	LY75-CD302:NM_001198759:exon1:c.C23G:p.P8R	exonic	ENST00000263636.4;LY75-CD302	.	nonsynonymous SNV	ENST00000263636.4:ENST00000263636.4:exon1:c.C23G:p.P8R	exonic	LY75;LY75-CD302	.	nonsynonymous SNV	LY75-CD302:ENST00000504764.5:exon1:c.C23G:p.P8R	rs200831621	0.00119808	.	0.0043	0.003	.	.	0.0022	0.0012	0.0027	.	.	.	.	.	.	D	T	0.0022	0.0022	0.0014	0	0	0	0.0068	0	0	0.01	D	0.925
chr2	162268127	162268127	T	C	exonic	IFIH1	.	nonsynonymous SNV	IFIH1:NM_022168:exon14:c.A2767G:p.I923V,	exonic	ENST00000263642.2;ENST00000649979.1;IFIH1	.	nonsynonymous SNV	IFIH1:ENST00000648433.1:exon13:c.A2650G:p.I884V	exonic	IFIH1	.	unknown	UNKNOWN,	rs35667974	0.00239617	0.0008	.	0.0099	0.001	.	0.0116	0.0025	0.0163	.	448756	Aicardi-Goutieres_syndrome_7|Singleton-Merten_syndrome_1|not_specified	MedGen:C3888244,OMIM:615846|MedGen:C4225427,OMIM:182250|MedGen:CN169374	criteria_provided,_multiple_submitters,_no_conflicts	Benign	T	T	0.0116	0.0116	0.0021	0.0016	0	0.0221	0.0180	0.0111	0.0002	0.24	T	0.958
chr2	166443618	166443618	T	C	exonic	SCN7A	.	nonsynonymous SNV	SCN7A:NM_002976:exon13:c.A1685G:p.Y562C,	exonic	ENST00000409855.6;SCN7A	.	nonsynonymous SNV	SCN7A:ENST00000424326.5:exon13:c.A1685G:p.Y562C	exonic	SCN7A	.	nonsynonymous SNV	SCN7A:ENST00000621965.4:exon13:c.A1685G:p.Y562C	rs143491867	0.00858626	0.0008	0.0461	0.001	.	0.0089	0.0007	0.0008	0.0006	.	439147	not_provided	MedGen:CN517202	criteria_provided,_multiple_submitters,_no_conflicts	Benign	D	D	0.0079	0.0079	0.0019	0.1055	0.0248	0.0052	0.0018	0.0174	0.0007	0	D	0.999
chr2	170392415	170392415	G	T	exonic	MYO3B	.	nonsynonymous SNV	MYO3B:NM_001083615:exon16:c.G1711T:p.D571Y	exonic	MYO3B	.	nonsynonymous SNV	MYO3B:ENST00000317935.10:exon16:c.G1711T:p.D571Y	exonic	MYO3B	.	nonsynonymous SNV	MYO3B:ENST00000408978.8:exon16:c.G1711T:p.D571Y	rs371432418	.	.	.	.	.	.	.	.	.	ID=COSM48591;OCCURENCE=1(lung)	.	.	.	.	.	D	D	6.697e-05	6.697e-05	0	0	0.0004	0	6.031e-05	0	6.333e-05	0.07	T	0.999
chr2	174581439	174581439	C	A	exonic	WIPF1	.	nonsynonymous SNV	WIPF1:NM_001077269:exon3:c.G52T:p.A18S	exonic	WIPF1	.	nonsynonymous SNV	WIPF1:ENST00000455428.5:exon2:c.G52T:p.A18S	exonic	WIPF1	.	nonsynonymous SNV	WIPF1:ENST00000272746.9:exon3:c.G52T:p.A18S	rs772615450	.	.	.	.	.	.	.	.	.	.	.	.	.	.	.	D	T	6.594e-05	6.594e-05	0	0	0	0.0008	2.999e-05	0.0011	0	0.01	D	1.0
chr2	178547823	178547823	T	G	exonic	TTN	.	nonsynonymous SNV	TTN:NM_003319:exon167:c.A66608C:p.K22203T	exonic	TTN	.	nonsynonymous SNV	TTN:ENST00000342175.11:exon167:c.A67184C:p.K22395T	exonic	TTN	.	nonsynonymous SNV	TTN:ENST00000342175.11:exon167:c.A67184C:p.K22395T	rs200766837	.	.	.	.	.	.	8e-05	.	0.0001	.	172652	Muscular_Diseases|not_specified|not_provided	Human_Phenotype_Ontology:HP:0003198,MedGen:C0026848|MedGen:CN169374|MedGen:CN517202	criteria_provided,_conflicting_interpretations	Conflicting_interpretations_of_pathogenicity	D	T	0.0007	0.0007	0	0	0	0.0015	0.0011	0	0	0	D	0.997
chr2	185788839	185788839	A	T	exonic	FSIP2	.	nonsynonymous SNV	FSIP2:NM_173651:exon16:c.A1703T:p.Y568F,	exonic	ENST00000424728.5	.	nonsynonymous SNV	ENST00000424728.5:ENST00000424728.5:exon16:c.A1703T:p.Y568F,	exonic	FSIP2	.	unknown	UNKNOWN,	rs111265848	.	.	.	.	.	.	.	.	.	.	.	.	.	.	.	D	T	0.0010	0.001	0	0	0	0.0038	0.0021	0	0	0	D	.
chr2	185795834	185795834	A	G	exonic	FSIP2	.	nonsynonymous SNV	FSIP2:NM_173651:exon16:c.A8698G:p.K2900E,	exonic	ENST00000424728.5;FSIP2	.	nonsynonymous SNV	ENST00000424728.5:ENST00000424728.5:exon16:c.A8698G:p.K2900E,	exonic	FSIP2	.	unknown	UNKNOWN,	rs182740901	0.00439297	0.0008	0.0072	0.0149	0.001	.	.	.	.	.	.	.	.	.	.	D	T	0.0083	0.0083	0	0.0047	0	0.0287	0.0152	0	0.0011	0.03	D	.
chr2	185801269	185801269	C	T	exonic	FSIP2	.	nonsynonymous SNV	FSIP2:NM_173651:exon17:c.C11963T:p.S3988F,	exonic	ENST00000424728.5	.	nonsynonymous SNV	ENST00000424728.5:ENST00000424728.5:exon17:c.C11963T:p.S3988F,	exonic	FSIP2	.	unknown	UNKNOWN,	rs113773415	0.000199681	.	.	0.001	.	.	.	.	.	.	.	.	.	.	.	D	T	0.0010	0.001	0	0	0	0.0038	0.0022	0	0	0.13	T	.
chr2	185808891	185808891	C	A	exonic	FSIP2	.	nonsynonymous SNV	FSIP2:NM_173651:exon17:c.C19585A:p.P6529T,	exonic	ENST00000424728.5	.	nonsynonymous SNV	ENST00000424728.5:ENST00000424728.5:exon17:c.C19585A:p.P6529T,	exonic	FSIP2	.	unknown	UNKNOWN,	rs148575803	0.00978435	.	0.0202	.	0.002	0.0327	0.0022	0.0011	0.0027	.	.	.	.	.	.	D	T	0.0141	0.0141	0.0011	0.0730	0.0511	0.0093	0.0045	0.0124	0.0024	0.01	D	.
chr2	195895203	195895203	G	A	exonic	DNAH7	.	nonsynonymous SNV	DNAH7:NM_018897:exon30:c.C4669T:p.P1557S,	exonic	ENST00000312428.10	.	nonsynonymous SNV	ENST00000312428.10:ENST00000312428.10:exon30:c.C4669T:p.P1557S,	exonic	DNAH7	.	unknown	UNKNOWN,	rs201744719	.	.	.	.	.	.	0.0007	.	0.0010	.	.	.	.	.	.	D	T	0.0004	0.0004	0	0	0	0.0008	0.0006	0.0011	0	0	D	1.0
chr2	196848023	196848023	A	G	exonic	PGAP1	.	nonsynonymous SNV	PGAP1:NM_001321100:exon20:c.T709C:p.Y237H	exonic	ENST00000354764.8	.	nonsynonymous SNV	ENST00000354764.8:ENST00000354764.8:exon21:c.T1876C:p.Y626H,	exonic	PGAP1	.	unknown	UNKNOWN,	rs150893861	.	.	.	.	.	.	0.0005	.	0.0008	.	450349	not_provided	MedGen:CN517202	criteria_provided,_single_submitter	Likely_benign	D	.	0.0006	0.0006	0	0	0	0.0051	0.0006	0.0044	0	0.04	D	0.978
chr2	197615951	197615951	G	A	exonic	RFTN2	.	nonsynonymous SNV	RFTN2:NM_144629:exon7:c.C1079T:p.P360L,	exonic	ENST00000295049.8;RFTN2	.	nonsynonymous SNV	RFTN2:ENST00000454447.1:exon2:c.C125T:p.P42L	exonic	RFTN2	.	nonsynonymous SNV	RFTN2:ENST00000295049.8:exon7:c.C1079T:p.P360L,	rs148997802	0.000199681	.	.	0.001	.	.	0.0005	.	0.0008	.	.	.	.	.	.	D	T	0.0008	0.0008	0	0	0	0	0.0017	0	0	0	D	1.0
chr2	202983584	202983584	-	A	exonic	CARF	.	frameshift insertion	CARF:NM_001352679:exon13:c.1107dupA:p.T372Nfs*5	exonic	CARF;ENST00000438828.3	.	frameshift insertion	CARF:ENST00000414439.5:exon14:c.1833dupA:p.T614Nfs*5	exonic	CARF	.	frameshift insertion	CARF:ENST00000414439.5:exon14:c.1833dupA:p.T614Nfs*5	rs201520695	0.000798722	.	0.0014	0.003	.	.	0.0057	0.0011	0.0077	ID=COSM1404623;OCCURENCE=1(large_intestine)	729760	not_provided	MedGen:CN517202	criteria_provided,_single_submitter	Likely_benign	.	.	0.0032	0.0032	0.0003	0.0017	0	0.0014	0.0053	0	0.0002	.	.	.
chr2	203272727	203272727	C	T	exonic	CYP20A1	.	nonsynonymous SNV	CYP20A1:NM_177538:exon6:c.C658T:p.R220W,	exonic	CYP20A1	.	nonsynonymous SNV	CYP20A1:ENST00000356079.8:exon6:c.C658T:p.R220W	exonic	CYP20A1	.	nonsynonymous SNV	CYP20A1:ENST00000356079.8:exon6:c.C658T:p.R220W	rs201185429	.	.	.	.	.	.	7.7e-05	.	0.0001	.	.	.	.	.	.	D	T	0.0002	0.0002	0.0001	0	0	0.0002	0.0001	0	0.0009	0.03	D	0.534
chr2	218656387	218656387	C	T	exonic	ZNF142	.	nonsynonymous SNV	ZNF142:NM_001366290:exon3:c.G43A:p.G15R	exonic	ZNF142	.	nonsynonymous SNV	ZNF142:ENST00000411696.6:exon3:c.G43A:p.G15R	exonic	ZNF142	.	nonsynonymous SNV	ZNF142:ENST00000411696.6:exon3:c.G43A:p.G15R	rs61733649	0.00299521	.	0.0029	0.006	0.0072	.	0.0059	0.0008	0.0083	.	.	.	.	.	.	D	T	0.0057	0.0057	0.0006	0.0026	0	0.0050	0.0078	0.0074	0.0056	0	D	0.995
chr2	219501858	219501858	C	A	exonic	GMPPA	.	nonsynonymous SNV	GMPPA:NM_013335:exon5:c.C250A:p.Q84K	exonic	GMPPA	.	nonsynonymous SNV	GMPPA:ENST00000435316.5:exon4:c.C145A:p.Q49K	exonic	GMPPA	.	nonsynonymous SNV	GMPPA:ENST00000622191.1:exon4:c.C250A:p.Q84K	rs767718283	.	.	.	.	.	.	.	.	.	.	.	.	.	.	.	D	T	3.304e-05	3.304e-05	0	0	0	0	6.009e-05	0	0	0.2	T	0.993
chr2	219501888	219501888	G	T	exonic	GMPPA	.	nonsynonymous SNV	GMPPA:NM_013335:exon5:c.G280T:p.G94C	exonic	GMPPA	.	nonsynonymous SNV	GMPPA:ENST00000435316.5:exon4:c.G175T:p.G59C	exonic	GMPPA	.	nonsynonymous SNV	GMPPA:ENST00000622191.1:exon4:c.G280T:p.G94C	rs753112469	.	.	.	.	.	.	.	.	.	.	.	.	.	.	.	D	T	3.295e-05	3.295e-05	0	0	0	0	5.995e-05	0	0	0.01	D	0.996
chr2	222695268	222695268	G	-	exonic	MOGAT1	.	frameshift deletion	MOGAT1:NM_058165:exon5:c.833delG:p.A280Pfs*16,	exonic	ENST00000446656.3	.	frameshift deletion	ENST00000446656.3:ENST00000446656.3:exon5:c.833delG:p.A280Pfs*16,	exonic	MOGAT1	.	frameshift deletion	MOGAT1:ENST00000446656.3:exon5:c.833delG:p.A280Pfs*16,	rs199514206	0.00519169	0.0015	0.013	0.0139	0.001	.	0.0123	0.0050	0.0156	.	.	.	.	.	.	.	.	0.0117	0.0117	0.0035	0.0091	0	0.0111	0.0173	0.0162	0.0019	.	.	.
chr2	232484141	232484141	C	G	exonic	ECEL1	.	nonsynonymous SNV	ECEL1:NM_001290787:exon7:c.G1267C:p.E423Q	exonic	ECEL1;ENST00000304546.5	.	nonsynonymous SNV	ECEL1:ENST00000409941.1:exon6:c.G1267C:p.E423Q	exonic	ECEL1	.	nonsynonymous SNV	ECEL1:ENST00000409941.1:exon6:c.G1267C:p.E423Q,	rs41265123	0.00499201	.	0.0043	0.0199	0.002	.	0.0155	0.0066	0.02	.	134397	not_specified	MedGen:CN169374	criteria_provided,_single_submitter	Benign	T	T	0.0145	0.0145	0.0034	0.0046	0	0.0126	0.0220	0.0111	0.0067	0.2	T	0.72
chr2	232844373	232844373	C	G	exonic	GIGYF2	.	nonsynonymous SNV	GIGYF2:NM_001103148:exon24:c.C3086G:p.S1029C	exonic	GIGYF2	.	nonsynonymous SNV	GIGYF2:ENST00000426102.1:exon3:c.C191G:p.S64C	exonic	GIGYF2	.	nonsynonymous SNV	GIGYF2:ENST00000409196.7:exon24:c.C3086G:p.S1029C	rs144086186	.	.	.	.	.	.	0.0012	.	0.0019	.	.	.	.	.	.	D	T	0.0008	0.0008	0.0003	0.0003	0	0.0002	0.0012	0	0.0002	0.05	D	0.997
chr2	234050993	234050993	T	A	exonic	SPP2	.	nonsynonymous SNV	SPP2:NM_006944:exon2:c.T108A:p.D36E,	exonic	ENST00000168148.7;SPP2	.	nonsynonymous SNV	ENST00000168148.7:ENST00000168148.7:exon2:c.T108A:p.D36E	exonic	SPP2	.	nonsynonymous SNV	SPP2:ENST00000373368.5:exon2:c.T108A:p.D36E,	rs115788299	0.0317492	.	0.0014	.	0.002	0.1548	0.0002	.	0.0002	.	.	.	.	.	.	T	T	0.0107	0.0107	0.0002	0.0003	0.1419	0	0.0002	0.0022	0.0026	0.37	T	0.896
chr2	240946223	240946223	G	C	exonic	CROCC2	.	nonsynonymous SNV	CROCC2:NM_001351305:exon15:c.G2333C:p.R778P,	exonic	CROCC2	.	nonsynonymous SNV	CROCC2:ENST00000443866.2:exon15:c.G2333C:p.R778P,	exonic	CROCC2	.	nonsynonymous SNV	CROCC2:ENST00000443866.2:exon15:c.G2333C:p.R778P,	rs537774664	0.000798722	0.0008	.	0.001	.	0.002	.	.	.	.	.	.	.	.	.	.	.	0.0006	0.0006	0	0	0.0021	0	0.0009	0	0.0005	.	.	.
chr2	241767760	241767760	C	T	exonic	D2HGDH	.	nonsynonymous SNV	D2HGDH:NM_001287249:exon9:c.C955T:p.L319F	exonic	D2HGDH;ENST00000321264.8	.	nonsynonymous SNV	D2HGDH:ENST00000403782.5:exon9:c.C955T:p.L319F	exonic	D2HGDH	.	nonsynonymous SNV	D2HGDH:ENST00000403782.5:exon9:c.C955T:p.L319F,	rs145839736	0.000199681	.	.	0.001	.	.	0.0008	0.0002	0.0012	.	286299	D-2-hydroxyglutaric_aciduria|D-2-hydroxyglutaric_aciduria_1|not_specified	Human_Phenotype_Ontology:HP:0012321,MedGen:C1833429,Orphanet:ORPHA79315|MedGen:C3152055,OMIM:600721|MedGen:CN169374	criteria_provided,_multiple_submitters,_no_conflicts	Uncertain_significance	T	D	0.0006	0.0006	0.0002	0	0	0	0.0011	0	0	0.06	T	0.559
chr20	187917	187917	A	G	exonic	DEFB128	.	nonsynonymous SNV	DEFB128:NM_001037732:exon2:c.T251C:p.I84T,	exonic	ENST00000334391.4	.	nonsynonymous SNV	ENST00000334391.4:ENST00000334391.4:exon2:c.T251C:p.I84T,	exonic	DEFB128	.	nonsynonymous SNV	DEFB128:ENST00000334391.4:exon2:c.T251C:p.I84T,	rs74181522	0.00399361	.	0.0086	0.0109	0.0031	.	0.0098	0.0025	0.0135	.	.	.	.	.	.	T	T	0.0092	0.0092	0.0019	0.0049	0.0001	0.0038	0.0122	0.0176	0.0111	0.64	T	0.816
chr20	227304	227304	C	T	exonic	DEFB129	.	nonsynonymous SNV	DEFB129:NM_080831:exon1:c.C16T:p.P6S,	exonic	DEFB129	.	nonsynonymous SNV	DEFB129:ENST00000246105.4:exon1:c.C16T:p.P6S,	exonic	DEFB129	.	nonsynonymous SNV	DEFB129:ENST00000246105.4:exon1:c.C16T:p.P6S,	rs375610686	.	.	.	.	.	.	7.7e-05	.	0.0001	.	.	.	.	.	.	D	T	0.0001	0.0001	0	0.0002	0	0	0.0002	0.0011	6.056e-05	0.05	D	0.957
chr20	259305	259305	A	C	exonic	DEFB132	.	stoploss	DEFB132:NM_207469:exon2:c.A287C:p.X96S,	exonic	ENST00000382376.3	.	stoploss	ENST00000382376.3:ENST00000382376.3:exon2:c.A287C:p.X96S,	exonic	DEFB132	.	unknown	UNKNOWN,	rs147196160	0.000399361	.	.	0.002	.	.	0.0014	0.0005	0.0019	.	.	.	.	.	.	.	.	0.0016	0.0016	0.0003	0.0006	0	0.0035	0.0023	0.0035	0	.	.	.
chr20	430368	430368	G	A	exonic	RBCK1	.	nonsynonymous SNV	RBCK1:NM_001323958:exon10:c.G961A:p.G321R	exonic	RBCK1	.	nonsynonymous SNV	RBCK1:ENST00000382181.2:exon10:c.G961A:p.G321R	exonic	RBCK1	.	nonsynonymous SNV	RBCK1:ENST00000382181.2:exon10:c.G961A:p.G321R	rs770973545	.	.	.	.	.	.	.	.	.	.	.	.	.	.	.	D	T	2.488e-05	2.488e-05	0	8.66e-05	0	0	1.513e-05	0	6.058e-05	0.02	D	1.0
chr20	3754403	3754403	C	T	exonic	C20orf27	.	nonsynonymous SNV	C20orf27:NM_001039140:exon5:c.G493A:p.V165I	exonic	C20orf27	.	nonsynonymous SNV	C20orf27:ENST00000217195.12:exon5:c.G493A:p.V165I	exonic	C20orf27	.	nonsynonymous SNV	C20orf27:ENST00000217195.12:exon5:c.G493A:p.V165I	rs771545812	.	.	.	.	.	.	.	.	.	.	.	.	.	.	.	T	.	8.249e-06	8.249e-06	0	0	0	0	1.501e-05	0	0	0.08	T	0.99
chr20	23495859	23495859	C	A	exonic	CST8	.	nonsynonymous SNV	CST8:NM_001281730:exon4:c.C374A:p.A125E	exonic	CST8;ENST00000246012.1	.	nonsynonymous SNV	ENST00000246012.1:ENST00000246012.1:exon4:c.C374A:p.A125E	exonic	CST8	.	nonsynonymous SNV	CST8:ENST00000246012.1:exon4:c.C374A:p.A125E,	rs559058456	0.000599042	.	.	.	0.0031	.	.	.	.	.	.	.	.	.	.	D	T	0.0004	0.0004	0	0	0	0	0	0	0.0026	0.79	T	0.994
chr20	31950383	31950383	A	G	exonic	PDRG1	.	nonsynonymous SNV	PDRG1:NM_030815:exon2:c.T92C:p.V31A,	exonic	ENST00000202017.5	.	nonsynonymous SNV	ENST00000202017.5:ENST00000202017.5:exon2:c.T92C:p.V31A,	exonic	PDRG1	.	unknown	UNKNOWN,	rs139473332	.	.	.	.	.	.	0.0012	0.0034	.	.	.	.	.	.	.	D	T	0.0003	0.0003	0.0031	0	0	0	0	0	0	0	D	0.994
chr20	32436685	32436685	C	T	exonic	ASXL1	.	nonsynonymous SNV	ASXL1:NM_001363734:exon11:c.C3790T:p.L1264F	exonic	ASXL1	.	nonsynonymous SNV	ASXL1:ENST00000306058.9:exon12:c.C3958T:p.L1320F	exonic	ASXL1	.	nonsynonymous SNV	ASXL1:ENST00000306058.9:exon12:c.C3958T:p.L1320F	rs6057581	0.0289537	0.1044	0.0058	0.003	.	.	0.0300	0.0876	0.0005	.	137328	C-like_syndrome|not_specified|not_provided	MedGen:C0796232,OMIM:605039,Orphanet:ORPHA97297|MedGen:CN169374|MedGen:CN517202	criteria_provided,_multiple_submitters,_no_conflicts	Benign	D	T	0.0089	0.0089	0.0973	0.0043	0	0	0.0004	0.0055	0.0001	0.51	T	0.994
chr20	32995633	32995633	C	T	exonic	SUN5	.	nonsynonymous SNV	SUN5:NM_080675:exon8:c.G520A:p.A174T,	exonic	ENST00000356173.7;SUN5	.	nonsynonymous SNV	SUN5:ENST00000375523.7:exon7:c.G445A:p.A149T	exonic	SUN5	.	nonsynonymous SNV	SUN5:ENST00000375523.7:exon7:c.G445A:p.A149T,	rs17123951	0.0467252	0.1641	0.0245	.	.	.	0.0457	0.1337	0.0006	ID=COSM1632236;OCCURENCE=2(liver)	.	.	.	.	.	D	T	0.0132	0.0132	0.1453	0.0054	0	0	0.0003	0.0066	0.0002	0.19	T	0.996
chr20	34999165	34999165	G	A	exonic	MYH7B	.	nonsynonymous SNV	MYH7B:NM_020884:exon36:c.G4426A:p.D1476N,	exonic	MYH7B	.	nonsynonymous SNV	MYH7B:ENST00000618182.4:exon33:c.G4423A:p.D1475N	exonic	MYH7B	.	nonsynonymous SNV	MYH7B:ENST00000618182.4:exon33:c.G4423A:p.D1475N	rs41307159	0.00339457	.	0.0043	0.0139	.	.	0.0138	0.0027	0.0195	.	.	.	.	.	.	D	D	0.0108	0.0108	0.0028	0.0042	0	0.0178	0.0164	0.0084	0.0006	0	D	0.957
chr20	35616276	35616276	T	A	exonic	SPAG4	.	stopgain	SPAG4:NM_003116:exon1:c.T273A:p.C91X,	exonic	ENST00000374273.7	.	stopgain	ENST00000374273.7:ENST00000374273.7:exon1:c.T273A:p.C91X,	exonic	SPAG4	.	stopgain	SPAG4:ENST00000374273.7:exon1:c.T273A:p.C91X,	rs201985967	0.000199681	.	.	0.001	.	.	.	.	.	.	.	.	.	.	.	.	.	0.0024	0.0024	0.0004	0.0006	0.0042	0.0209	0.0020	0	0.0007	1	T	.
chr20	35632585	35632585	T	C	exonic	CPNE1	.	nonsynonymous SNV	CPNE1:NM_001198863:exon3:c.A241G:p.I81V	exonic	CPNE1	.	nonsynonymous SNV	CPNE1:ENST00000317677.9:exon3:c.A256G:p.I86V	exonic	CPNE1	.	nonsynonymous SNV	CPNE1:ENST00000317677.9:exon3:c.A256G:p.I86V	rs115030900	0.00878594	0.0318	0.0029	.	.	.	0.0110	0.0322	0.0001	.	.	.	.	.	.	T	T	0.0030	0.003	0.0335	0.0008	0	0	4.496e-05	0.0011	0.0003	0.54	T	0.997
chr20	41362388	41362388	C	T	exonic	EMILIN3	.	nonsynonymous SNV	EMILIN3:NM_052846:exon4:c.G1181A:p.R394H,	exonic	ENST00000332312.3	.	nonsynonymous SNV	ENST00000332312.3:ENST00000332312.3:exon4:c.G1181A:p.R394H,	exonic	EMILIN3	.	unknown	UNKNOWN,	rs751299858	.	.	.	.	.	.	.	.	.	.	.	.	.	.	.	D	T	1.707e-05	1.707e-05	0.0001	0	0	0	1.557e-05	0	0	.	.	1.0
chr20	44720012	44720012	G	A	exonic	CCN5	.	nonsynonymous SNV	CCN5:NM_001323369:exon2:c.G176A:p.R59Q	exonic	CCN5	.	nonsynonymous SNV	CCN5:ENST00000190983.4:exon2:c.G176A:p.R59Q	exonic	WISP2	.	nonsynonymous SNV	WISP2:ENST00000190983.4:exon2:c.G176A:p.R59Q	rs33932543	0.00439297	.	0.0101	0.0149	.	.	0.0112	0.0034	0.0152	.	.	.	.	.	.	T	T	0.0126	0.0126	0.0037	0.0062	0.0003	0.0142	0.0187	0.0058	0.0043	1	T	0.927
chr20	44936703	44936703	C	T	exonic	PABPC1L	.	nonsynonymous SNV	PABPC1L:NM_001124756:exon12:c.C1618T:p.P540S,	exonic	PABPC1L	.	nonsynonymous SNV	PABPC1L:ENST00000372822.2:exon2:c.C103T:p.P35S	exonic	PABPC1L	.	nonsynonymous SNV	PABPC1L:ENST00000372819.5:exon3:c.C280T:p.P94S	rs775397387	.	.	.	.	.	.	.	.	.	.	.	.	.	.	.	D	T	6.921e-05	6.921e-05	0	0	0	0.0004	9.439e-05	0	0	0.26	T	0.875
chr20	45960265	45960265	G	A	exonic	ZNF335	.	nonsynonymous SNV	ZNF335:NM_022095:exon14:c.C1963T:p.P655S,	exonic	ENST00000322927.2	.	nonsynonymous SNV	ENST00000322927.2:ENST00000322927.2:exon14:c.C1963T:p.P655S,	exonic	ZNF335	.	unknown	UNKNOWN,	rs117132825	0.0145767	0.0008	0.0072	0.0129	0.0542	0.001	0.0069	0.0020	0.0094	.	208673	not_specified|not_provided	MedGen:CN169374|MedGen:CN517202	criteria_provided,_conflicting_interpretations	Conflicting_interpretations_of_pathogenicity	T	T	0.0120	0.012	0.0017	0.0042	0.0001	0.0024	0.0091	0.0077	0.0456	0.29	T	0.92
chr20	46010960	46010960	C	T	exonic	MMP9	.	nonsynonymous SNV	MMP9:NM_004994:exon4:c.C559T:p.L187F,	exonic	MMP9	.	nonsynonymous SNV	MMP9:ENST00000372330.3:exon4:c.C559T:p.L187F,	exonic	MMP9	.	nonsynonymous SNV	MMP9:ENST00000372330.3:exon4:c.C559T:p.L187F,	rs55789927	0.00199681	.	.	0.003	0.0072	.	0.0009	.	0.0014	.	705508	not_provided	MedGen:CN517202	criteria_provided,_single_submitter	Likely_benign	D	T	0.0026	0.0026	0	0.0007	0	0.0054	0.0021	0.0011	0.0081	0.16	T	0.997
chr20	46213006	46213006	C	T	exonic	CDH22	.	nonsynonymous SNV	CDH22:NM_021248:exon6:c.G1021A:p.V341I,	exonic	ENST00000372262.7;ENST00000537909.2	.	nonsynonymous SNV	ENST00000372262.7:ENST00000372262.7:exon5:c.G1021A:p.V341I	exonic	CDH22	.	unknown	UNKNOWN,	rs757536133	.	.	.	.	.	.	.	.	.	.	.	.	.	.	.	T	T	5.783e-05	5.783e-05	0	0	0	0	7.51e-05	0	0.0001	0.31	T	0.923
chr20	49058476	49058476	G	A	exonic	CSE1L	.	nonsynonymous SNV	CSE1L:NM_001256135:exon2:c.G13A:p.D5N	exonic	CSE1L;ENST00000262982.2	.	nonsynonymous SNV	ENST00000262982.2:ENST00000262982.2:exon2:c.G13A:p.D5N	exonic	CSE1L	.	nonsynonymous SNV	CSE1L:ENST00000396192.7:exon2:c.G13A:p.D5N,	rs372551577	.	.	.	.	.	.	7.7e-05	.	0.0001	ID=COSM1307496;OCCURENCE=1(urinary_tract)	.	.	.	.	.	D	T	1.649e-05	1.649e-05	0	8.643e-05	0	0	1.5e-05	0	0	0.16	T	0.979
chr20	49906412	49906412	T	C	exonic	SPATA2	.	nonsynonymous SNV	SPATA2:NM_001135773:exon3:c.A770G:p.Y257C	exonic	ENST00000289431.9;SPATA2	.	nonsynonymous SNV	ENST00000289431.9:ENST00000289431.9:exon3:c.A770G:p.Y257C	exonic	SPATA2	.	nonsynonymous SNV	SPATA2:ENST00000422556.1:exon3:c.A770G:p.Y257C,	rs145229601	.	.	.	.	.	.	0.0015	0.0005	0.0020	.	.	.	.	.	.	D	T	0.0018	0.0018	0.0001	0.0002	0	0.0026	0.0030	0.0011	0.0002	0.18	T	1.0
chr20	53576021	53576021	G	A	exonic	ZNF217	.	nonsynonymous SNV	ZNF217:NM_006526:exon3:c.C2743T:p.P915S,	exonic	ZNF217	.	nonsynonymous SNV	ZNF217:ENST00000437222.1:exon1:c.C7T:p.P3S	exonic	ZNF217	.	nonsynonymous SNV	ZNF217:ENST00000302342.3:exon3:c.C2743T:p.P915S	rs61730989	0.00259585	.	0.0058	0.007	0.002	.	0.0050	0.0014	0.0069	.	.	.	.	.	.	T	T	0.0048	0.0048	0.0020	0.0024	0	0.0089	0.0066	0.0055	0.0014	0.04	D	0.851
chr20	53576022	53576022	C	A	exonic	ZNF217	.	nonsynonymous SNV	ZNF217:NM_006526:exon3:c.G2742T:p.E914D,	exonic	ZNF217	.	nonsynonymous SNV	ZNF217:ENST00000437222.1:exon1:c.G6T:p.E2D	exonic	ZNF217	.	nonsynonymous SNV	ZNF217:ENST00000302342.3:exon3:c.G2742T:p.E914D	rs61730988	0.00259585	.	0.0058	0.007	0.002	.	0.0050	0.0014	0.0069	.	.	.	.	.	.	D	T	0.0048	0.0048	0.0020	0.0024	0	0.0089	0.0066	0.0055	0.0014	0.02	D	0.996
chr20	62308135	62308135	C	T	exonic	ADRM1	.	nonsynonymous SNV	ADRM1:NM_001281437:exon7:c.C854T:p.A285V	exonic	ADRM1;ENST00000253003.6	.	nonsynonymous SNV	ADRM1:ENST00000620230.4:exon7:c.C854T:p.A285V	exonic	ADRM1	.	nonsynonymous SNV	ADRM1:ENST00000620230.4:exon7:c.C854T:p.A285V	rs45576934	0.00579073	.	0.0115	0.0159	0.0051	.	0.0095	0.0023	0.0132	.	717095	not_provided	MedGen:CN517202	criteria_provided,_single_submitter	Benign	T	.	0.0087	0.0087	0.0014	0.0067	0	0.0036	0.0124	0.0100	0.0063	0.12	T	0.99
chr20	62570451	62570451	C	G	exonic	MIR1-1HG	.	nonsynonymous SNV	MIR1-1HG:NM_178463:exon4:c.C128G:p.P43R	ncRNA_exonic	MIR1-1HG	.	.	.	ncRNA_exonic	MIR1-1HG	.	.	.	rs145416632	0.00539137	.	.	0.004	0.0072	0.0159	0.0006	.	0.0009	.	.	.	.	.	.	.	.	0.0043	0.0043	0	9.242e-05	0.0264	0.0069	0.0028	0.0082	0.0034	0	D	0.998
chr20	62838713	62838713	G	A	exonic	COL9A3	.	nonsynonymous SNV	COL9A3:NM_001853:exon31:c.G1816A:p.A606T,	exonic	COL9A3;ENST00000343916.7	.	nonsynonymous SNV	ENST00000343916.7:ENST00000343916.7:exon31:c.G1816A:p.A606T	exonic	COL9A3	.	unknown	UNKNOWN,	rs142792529	0.00459265	.	.	0.0139	0.0092	.	0.0094	0.0037	0.0123	.	257419	Multiple_Epiphyseal_Dysplasia,_Dominant|not_specified|not_provided	MedGen:CN043640|MedGen:CN169374|MedGen:CN517202	criteria_provided,_multiple_submitters,_no_conflicts	Benign/Likely_benign	T	D	0.0094	0.0094	0.0036	0.0120	0	0.1	0.0116	0	0.0092	0.58	T	0.859
chr21	33555095	33555095	G	A	exonic	SON	.	nonsynonymous SNV	SON:NM_001291411:exon3:c.G5864A:p.R1955H	exonic	ENST00000356577.8;SON	.	nonsynonymous SNV	SON:ENST00000421541.1:exon1:c.G47A:p.R16H	exonic	SON	.	nonsynonymous SNV	SON:ENST00000300278.8:exon3:c.G5864A:p.R1955H	rs764200768	.	.	.	.	.	.	.	.	.	.	.	.	.	.	.	D	T	2.994e-05	2.994e-05	0	0	0	0	5.459e-05	0	0	0	D	1.0
chr21	33834356	33834356	A	G	exonic	ITSN1	.	nonsynonymous SNV	ITSN1:NM_001331011:exon25:c.A3173G:p.K1058R	exonic	ENST00000381318.7;ITSN1	.	nonsynonymous SNV	ITSN1:ENST00000399349.5:exon25:c.A3173G:p.K1058R	exonic	ITSN1	.	nonsynonymous SNV	ITSN1:ENST00000399349.5:exon25:c.A3173G:p.K1058R	rs747710795	.	.	.	.	.	.	.	.	.	.	.	.	.	.	.	D	T	8.467e-06	8.467e-06	0	0	0	0	1.547e-05	0	0	0.08	T	0.996
chr21	38806118	38806118	A	G	exonic	ETS2	.	nonsynonymous SNV	ETS2:NM_001256295:exon2:c.A418G:p.R140G,	UTR5	ENST00000360214.7;ENST00000360938.7;ETS2	ENST00000360214.7:c.-3917A>G;ENST00000360938.7:c.-3917A>G;ENST00000432278.5:c.-3917A>G	.	.	UTR5	ETS2	ENST00000360214.7:c.-3917A>G;ENST00000360938.7:c.-3917A>G	.	.	rs185407591	0.163339	0.4236	0.1023	0.1183	0.0225	0.0456	.	.	.	.	.	.	.	.	.	.	.	0	0	.	.	.	.	.	.	0	.	.	.
chr21	38806119	38806119	G	C	exonic	ETS2	.	nonsynonymous SNV	ETS2:NM_001256295:exon2:c.G419C:p.R140T,	UTR5	ENST00000360214.7;ENST00000360938.7;ETS2	ENST00000360214.7:c.-3916G>C;ENST00000360938.7:c.-3916G>C;ENST00000432278.5:c.-3916G>C	.	.	UTR5	ETS2	ENST00000360214.7:c.-3916G>C;ENST00000360938.7:c.-3916G>C	.	.	rs190801053	0.163139	0.4228	0.1023	0.1183	0.0225	0.0456	.	.	.	.	.	.	.	.	.	.	.	0	0	.	.	.	.	.	.	0	.	.	.
chr21	44457344	44457344	C	T	exonic	LRRC3	.	nonsynonymous SNV	LRRC3:NM_030891:exon2:c.C700T:p.R234W,	exonic	ENST00000291592.5	.	nonsynonymous SNV	ENST00000291592.5:ENST00000291592.5:exon2:c.C700T:p.R234W,	exonic	LRRC3	.	unknown	UNKNOWN,	rs567420098	0.000199681	.	.	.	0.001	.	.	.	.	ID=COSM355574;OCCURENCE=1(lung)	.	.	.	.	.	D	T	2.507e-05	2.507e-05	0	0	0	0	0	0	0.0002	0	D	1.0
chr21	45468595	45468595	C	T	exonic	COL18A1	.	nonsynonymous SNV	COL18A1:NM_030582:exon2:c.C1000T:p.R334W	exonic	COL18A1;ENST00000355480.9;ENST00000400337.6	.	nonsynonymous SNV	ENST00000355480.9:ENST00000355480.9:exon2:c.C1000T:p.R334W	exonic	COL18A1	.	nonsynonymous SNV	COL18A1:ENST00000359759.8:exon2:c.C1705T:p.R569W,	rs375242667	.	.	.	.	.	.	7.9e-05	.	0.0001	.	.	.	.	.	.	D	T	2.491e-05	2.491e-05	0.0001	0	0	0	3.009e-05	0	0	0	D	0.999
chr22	20116392	20116392	C	T	exonic	RANBP1;TRMT2A	.	stopgain	RANBP1:NM_001278639:exon1:c.C208T:p.R70X,	exonic	ENST00000252136.11;ENST00000430524.5;RANBP1;TRMT2A	.	stopgain	ENST00000430524.5:ENST00000430524.5:exon1:c.C208T:p.R70X	exonic	RANBP1;TRMT2A	.	nonsynonymous SNV	TRMT2A:ENST00000404751.7:exon2:c.G245A:p.R82H	rs138578557	0.00199681	.	.	.	.	0.0099	.	.	.	.	.	.	.	.	.	D	T	0.0009	0.0009	0	0	0.0116	0	1.58e-05	0	0.0002	0.02	D	1.0
chr22	23182199	23182199	C	G	exonic	BCR	.	nonsynonymous SNV	BCR:NM_004327:exon1:c.C1239G:p.I413M	exonic	BCR;ENST00000305877.12	.	nonsynonymous SNV	ENST00000305877.12:ENST00000305877.12:exon1:c.C1239G:p.I413M	exonic	BCR	.	nonsynonymous SNV	BCR:ENST00000305877.12:exon1:c.C1239G:p.I413M	rs56321828	0.000399361	.	.	0.002	.	.	0.0008	0.0002	0.0012	.	742778	not_provided	MedGen:CN517202	criteria_provided,_single_submitter	Likely_benign	D	T	0.0020	0.002	0	0.0002	0	0.0051	0.0031	0.0020	0.0002	0	D	0.988
chr22	23764640	23764640	G	A	exonic	C22orf15	.	nonsynonymous SNV	C22orf15:NM_001331041:exon4:c.G257A:p.R86K,	exonic	C22orf15	.	nonsynonymous SNV	C22orf15:ENST00000305199.9:exon4:c.G257A:p.R86K,	exonic	C22orf15	.	nonsynonymous SNV	C22orf15:ENST00000305199.9:exon4:c.G257A:p.R86K,	rs566868267	0.00519169	.	.	.	0.0266	.	.	.	.	.	.	.	.	.	.	T	.	0.0025	0.0025	0	8.648e-05	0.0001	0	5.998e-05	0.0044	0.0179	0.86	T	.
chr22	29769707	29769707	T	A	exonic	UQCR10	.	stopgain	UQCR10:NM_013387:exon2:c.T180A:p.Y60X,	exonic	UQCR10	.	stopgain	UQCR10:ENST00000330029.6:exon2:c.T180A:p.Y60X,	exonic	UQCR10	.	stopgain	UQCR10:ENST00000330029.6:exon2:c.T180A:p.Y60X,	rs201266199	0.000199681	.	.	0.001	.	.	8.3e-05	.	0.0001	.	.	.	.	.	.	.	.	0.0007	0.0007	0	0.0080	0	0	0.0003	0.0017	0	0	D	.
chr22	31291079	31291079	C	T	exonic	PIK3IP1	.	nonsynonymous SNV	PIK3IP1:NM_001135911:exon3:c.G193A:p.G65S	exonic	ENST00000215912.9;PIK3IP1	.	nonsynonymous SNV	ENST00000215912.9:ENST00000215912.9:exon3:c.G193A:p.G65S	exonic	PIK3IP1	.	nonsynonymous SNV	PIK3IP1:ENST00000215912.9:exon3:c.G193A:p.G65S	rs202173016	0.00439297	.	0.0014	0.002	0.0133	0.006	0.0007	.	0.0011	.	.	.	.	.	.	D	T	0.0091	0.0091	0	0.0080	0.0036	0	0.0055	0	0.0156	0.01	D	1.0
chr22	35393515	35393515	C	T	exonic	HMOX1	.	nonsynonymous SNV	HMOX1:NM_002133:exon5:c.C784T:p.R262C,	exonic	ENST00000216117.8	.	nonsynonymous SNV	ENST00000216117.8:ENST00000216117.8:exon5:c.C784T:p.R262C,	exonic	HMOX1	.	unknown	UNKNOWN,	rs149487862	0.000199681	.	.	0.001	.	.	0.0008	.	0.0012	.	.	.	.	.	.	T	T	0.0006	0.0006	0.0002	0.0003	0.0001	0	0.0010	0.0011	0.0002	0.21	T	0.544
chr22	37300911	37300911	T	C	exonic	CYTH4	.	nonsynonymous SNV	CYTH4:NM_001318024:exon7:c.T268C:p.F90L	exonic	ENST00000248901.10	.	nonsynonymous SNV	ENST00000248901.10:ENST00000248901.10:exon7:c.T439C:p.F147L,	exonic	CYTH4	.	unknown	UNKNOWN,	rs139032641	0.000399361	.	0.0014	0.001	.	.	0.0003	.	0.0005	.	.	.	.	.	.	D	T	0.0003	0.0003	0	0	0	0	0.0004	0.0012	0.0003	0.01	D	0.954
chr22	37678592	37678592	G	A	exonic	LGALS1	.	nonsynonymous SNV	LGALS1:NM_002305:exon3:c.G199A:p.G67R,	exonic	ENST00000215909.9	.	nonsynonymous SNV	ENST00000215909.9:ENST00000215909.9:exon3:c.G199A:p.G67R,	exonic	LGALS1	.	unknown	UNKNOWN,	rs772352732	.	.	.	.	.	.	.	.	.	.	.	.	.	.	.	T	T	9.019e-06	9.019e-06	0	9.459e-05	0	0	0	0	0	0.04	D	0.987
chr22	37678607	37678607	G	A	exonic	LGALS1	.	nonsynonymous SNV	LGALS1:NM_002305:exon3:c.G214A:p.E72K,	exonic	ENST00000215909.9	.	nonsynonymous SNV	ENST00000215909.9:ENST00000215909.9:exon3:c.G214A:p.E72K,	exonic	LGALS1	.	unknown	UNKNOWN,	rs139136100	0.000998403	.	.	0.003	0.002	.	0.0012	0.0005	0.0016	.	.	.	.	.	.	D	T	0.0018	0.0018	0	0.0002	0.0003	0.0022	0.0024	0.0042	0.0018	0	D	1.0
chr22	39235781	39235781	C	T	exonic	PDGFB	.	nonsynonymous SNV	PDGFB:NM_002608:exon2:c.G157A:p.G53R	exonic	ENST00000331163.10;PDGFB	.	nonsynonymous SNV	ENST00000331163.10:ENST00000331163.10:exon2:c.G157A:p.G53R	exonic	PDGFB	.	nonsynonymous SNV	PDGFB:ENST00000331163.10:exon2:c.G157A:p.G53R	rs148252800	0.000399361	.	.	0.002	.	.	0.0006	.	0.0009	.	729188	not_provided	MedGen:CN517202	criteria_provided,_single_submitter	Benign	T	T	0.0016	0.0016	0.0001	8.857e-05	0	0.0155	0.0013	0.0057	0.0002	0.02	D	0.939
chr22	41925447	41925447	G	A	exonic	TNFRSF13C	.	nonsynonymous SNV	TNFRSF13C:NM_052945:exon3:c.C475T:p.H159Y,	exonic	TNFRSF13C	.	nonsynonymous SNV	TNFRSF13C:ENST00000291232.4:exon3:c.C475T:p.H159Y,	exonic	TNFRSF13C	.	nonsynonymous SNV	TNFRSF13C:ENST00000291232.4:exon3:c.C475T:p.H159Y,	rs61756766	0.00339457	0.0008	0.0086	0.007	0.0031	.	0.0052	0.0014	0.0071	.	433980	Common_variable_immunodeficiency_4|not_provided	MedGen:C3150739,OMIM:613494|MedGen:CN517202	criteria_provided,_conflicting_interpretations	Conflicting_interpretations_of_pathogenicity	D	T	0.0056	0.0056	0.0022	0.0075	0	0.0025	0.0068	0.0113	0.0056	0	D	0.994
chr22	43168906	43168906	T	C	exonic	TTLL12	.	nonsynonymous SNV	TTLL12:NM_015140:exon13:c.A1651G:p.I551V,	exonic	ENST00000216129.6	.	nonsynonymous SNV	ENST00000216129.6:ENST00000216129.6:exon13:c.A1651G:p.I551V,	exonic	TTLL12	.	unknown	UNKNOWN,	rs371460098	.	.	.	.	.	.	0.0002	.	0.0003	.	.	.	.	.	.	D	T	0.0002	0.0002	0	0	0	0	0.0003	0	0	0.08	T	0.857
chr22	45293237	45293237	G	A	exonic	UPK3A	.	nonsynonymous SNV	UPK3A:NM_001167574:exon3:c.G265A:p.V89I	exonic	ENST00000216211.8;UPK3A	.	nonsynonymous SNV	UPK3A:ENST00000396082.2:exon3:c.G265A:p.V89I	exonic	UPK3A	.	nonsynonymous SNV	UPK3A:ENST00000396082.2:exon3:c.G265A:p.V89I,	rs147247708	0.00159744	.	.	.	.	0.0079	.	.	.	.	378752	not_specified	MedGen:CN169374	criteria_provided,_single_submitter	Likely_benign	D	D	0.0011	0.0011	0.0003	0.0033	0.0091	0	0.0001	0.0011	0.0004	0.21	T	1.0
chr22	46535030	46535030	C	T	exonic	CELSR1	.	nonsynonymous SNV	CELSR1:NM_014246:exon1:c.G2141A:p.R714H,	exonic	CELSR1	.	nonsynonymous SNV	CELSR1:ENST00000262738.7:exon1:c.G2141A:p.R714H,	exonic	CELSR1	.	nonsynonymous SNV	CELSR1:ENST00000262738.7:exon1:c.G2141A:p.R714H,	rs142220741	0.00159744	.	.	.	.	0.0079	.	.	.	.	.	.	.	.	.	D	T	0.0004	0.0004	0	8.726e-05	0.0053	0	1.555e-05	0	6.083e-05	0.08	T	1.0
chr22	50721350	50721350	G	A	exonic	SHANK3	.	nonsynonymous SNV	SHANK3:NM_033517:exon21:c.G3475A:p.A1159T,	exonic	SHANK3	.	nonsynonymous SNV	SHANK3:ENST00000445220.5:exon22:c.G3496A:p.A1166T	exonic	SHANK3	.	nonsynonymous SNV	SHANK3:ENST00000445220.5:exon22:c.G3496A:p.A1166T	rs139686326	0.00319489	.	.	0.001	0.001	0.0139	.	.	.	.	580689	History_of_neurodevelopmental_disorder	MedGen:C2711754	criteria_provided,_single_submitter	Likely_benign	.	.	0.0011	0.0011	0	0	0.0072	0.0042	0.0002	0.0024	0.0015	0.69	T	0.808
chr3	1321796	1321796	G	A	exonic	CNTN6	.	nonsynonymous SNV	CNTN6:NM_001349357:exon6:c.G596A:p.R199Q	exonic	CNTN6;ENST00000446702.6	.	nonsynonymous SNV	CNTN6:ENST00000350110.2:exon8:c.G908A:p.R303Q	exonic	CNTN6	.	nonsynonymous SNV	CNTN6:ENST00000350110.2:exon8:c.G908A:p.R303Q,	rs41293401	0.00259585	0.0015	0.0058	0.007	.	.	0.0070	0.0016	0.0098	.	697838	not_provided	MedGen:CN517202	criteria_provided,_single_submitter	Likely_benign	D	T	0.0056	0.0056	0.0014	0.0018	0	0.0061	0.0087	0.0088	0.0012	0.2	T	0.999
chr3	4779607	4779607	G	T	exonic	ITPR1	.	nonsynonymous SNV	ITPR1:NM_002222:exon45:c.G6160T:p.A2054S	exonic	ITPR1	.	nonsynonymous SNV	ITPR1:ENST00000648038.1:exon29:c.G4111T:p.A1371S	exonic	ITPR1	.	nonsynonymous SNV	ITPR1:ENST00000302640.12:exon48:c.G6304T:p.A2102S,	rs373973399	.	.	.	.	.	.	0.0002	.	0.0002	.	494949	Spinocerebellar_ataxia_29|not_provided	MedGen:C1861732,OMIM:117360,Orphanet:ORPHA208513|MedGen:CN517202	criteria_provided,_conflicting_interpretations	Conflicting_interpretations_of_pathogenicity	T	D	5.797e-05	5.797e-05	0	0	0	0	0.0001	0	0	0.25	T	0.747
chr3	8537190	8537190	T	C	exonic	LMCD1	.	nonsynonymous SNV	LMCD1:NM_001278235:exon3:c.T137C:p.I46T	exonic	ENST00000157600.7;LMCD1	.	nonsynonymous SNV	ENST00000157600.7:ENST00000157600.7:exon3:c.T137C:p.I46T	exonic	LMCD1	.	nonsynonymous SNV	LMCD1:ENST00000426878.2:exon3:c.T137C:p.I46T,	rs182272923	0.000399361	.	.	.	.	0.002	.	.	.	.	.	.	.	.	.	T	T	0.0002	0.0002	0	0	0.0026	0	1.511e-05	0	0	0.16	T	0.627
chr3	9842025	9842025	C	T	exonic	RPUSD3	.	nonsynonymous SNV	RPUSD3:NM_001142547:exon3:c.G320A:p.G107E	exonic	RPUSD3	.	nonsynonymous SNV	RPUSD3:ENST00000433535.6:exon3:c.G320A:p.G107E	exonic	RPUSD3	.	nonsynonymous SNV	RPUSD3:ENST00000433535.6:exon3:c.G320A:p.G107E	rs144616051	0.00179712	.	.	0.001	0.001	0.0069	0.0005	0.0002	0.0006	.	.	.	.	.	.	D	T	0.0010	0.001	0	0.0019	0.0062	0	0.0005	0	0.0008	0.03	D	1.0
chr3	12820101	12820101	G	A	exonic	CAND2	.	nonsynonymous SNV	CAND2:NM_012298:exon9:c.G2681A:p.R894Q	exonic	CAND2	.	nonsynonymous SNV	CAND2:ENST00000295989.9:exon9:c.G2681A:p.R894Q	exonic	CAND2	.	nonsynonymous SNV	CAND2:ENST00000295989.9:exon9:c.G2681A:p.R894Q	rs181307051	0.00499201	.	0.036	.	.	.	0.0002	0.0002	0.0002	.	697815	not_provided	MedGen:CN517202	criteria_provided,_single_submitter	Benign	D	T	0.0041	0.0041	0.0014	0.0346	0.0048	0	0.0003	0.0022	0.0007	0.07	T	0.993
chr3	14134844	14134844	C	T	exonic	TMEM43	.	nonsynonymous SNV	TMEM43:NM_024334:exon8:c.C658T:p.R220C,	exonic	TMEM43	.	nonsynonymous SNV	TMEM43:ENST00000306077.4:exon8:c.C658T:p.R220C,	exonic	TMEM43	.	nonsynonymous SNV	TMEM43:ENST00000306077.4:exon8:c.C658T:p.R220C,	rs562700595	.	.	.	.	.	.	.	.	.	.	178509	Primary_familial_hypertrophic_cardiomyopathy	MeSH:D024741,MedGen:C0949658,Orphanet:ORPHA155,SNOMED_CT:83978005	no_assertion_criteria_provided	Likely_benign	T	T	3.297e-05	3.297e-05	0	0	0.0001	0	0	0	0.0002	0.11	T	0.998
chr3	33051913	33051913	T	C	exonic	GLB1	.	nonsynonymous SNV	GLB1:NM_001135602:exon5:c.A491G:p.D164G	exonic	ENST00000307363.9;GLB1	.	nonsynonymous SNV	GLB1:ENST00000415454.1:exon4:c.A407G:p.D136G	exonic	GLB1	.	nonsynonymous SNV	GLB1:ENST00000307377.12:exon5:c.A491G:p.D164G	rs76016860	0.000199681	.	.	.	.	0.001	.	.	.	.	.	.	.	.	.	D	D	7.454e-05	7.454e-05	0	0	0.0003	0	0	0	0.0004	0.04	D	0.686
chr3	37025749	37025749	T	A	exonic	MLH1	.	nonsynonymous SNV	MLH1:NM_001354625:exon9:c.T77A:p.V26D	exonic	MLH1	.	nonsynonymous SNV	MLH1:ENST00000536378.5:exon11:c.T428A:p.V143D	exonic	MLH1	.	nonsynonymous SNV	MLH1:ENST00000536378.5:exon11:c.T428A:p.V143D	rs63750447	0.00519169	.	.	.	.	0.0258	7.7e-05	.	0.0001	ID=COSM26085;OCCURENCE=3(pancreas),8(ovary),1(lung)	50071	Lung_adenocarcinoma|Hereditary_cancer-predisposing_syndrome|Turcot_syndrome|Adenocarcinoma_of_stomach|Muir-Torr├й_syndrome|Lynch_syndrome|Lynch_syndrome_II|Lynch_syndrome_I|not_specified|not_provided	Human_Phenotype_Ontology:HP:0030078,MeSH:C538231,MedGen:C0152013|MedGen:C0027672,SNOMED_CT:699346009|MedGen:C0265325,OMIM:276300,Orphanet:ORPHA252202,SNOMED_CT:61665008|MedGen:C0278701|MedGen:C1321489,OMIM:158320,Orphanet:ORPHA587,SNOMED_CT:403824007|MedGen:C1333990,Orphanet:ORPHA144|MedGen:C1333991,OMIM:609310|MedGen:C2936783,OMIM:120435|MedGen:CN169374|MedGen:CN517202	reviewed_by_expert_panel	Benign	D	D	0.0028	0.0028	0	0	0.0385	0.0002	0	0.0011	0.0001	0	D	1.0
chr3	38307279	38307279	C	T	exonic	SLC22A14	.	nonsynonymous SNV	SLC22A14:NM_004803:exon2:c.C542T:p.T181M	exonic	SLC22A14	.	nonsynonymous SNV	SLC22A14:ENST00000273173.4:exon2:c.C542T:p.T181M	exonic	SLC22A14	.	nonsynonymous SNV	SLC22A14:ENST00000273173.4:exon2:c.C542T:p.T181M	rs148705199	.	.	.	.	.	.	0.0002	0.0002	0.0001	ID=COSM1725399;OCCURENCE=1(liver)	.	.	.	.	.	T	T	0.0005	0.0005	0.0002	0.0005	0	0.0030	0.0005	0.0011	6.056e-05	0.23	T	0.981
chr3	38718792	38718792	G	A	exonic	SCN10A	.	nonsynonymous SNV	SCN10A:NM_001293307:exon19:c.C3248T:p.T1083M	exonic	SCN10A	.	nonsynonymous SNV	SCN10A:ENST00000643108.1:exon20:c.C3542T:p.T1181M	exonic	SCN10A	.	unknown	UNKNOWN,	rs150773437	0.00219649	.	.	.	.	0.0109	.	.	.	.	239224	not_specified|not_provided	MedGen:CN169374|MedGen:CN517202	criteria_provided,_multiple_submitters,_no_conflicts	Benign	D	D	0.0007	0.0007	9.641e-05	0	0.0091	0	7.504e-05	0.0011	6.064e-05	0	D	1.0
chr3	41900763	41900763	A	G	exonic	ULK4	.	nonsynonymous SNV	ULK4:NM_001322501:exon12:c.T343C:p.S115P	exonic	ENST00000301831.8;ULK4	.	nonsynonymous SNV	ENST00000301831.8:ENST00000301831.8:exon13:c.T1249C:p.S417P	exonic	ULK4	.	nonsynonymous SNV	ULK4:ENST00000420927.5:exon13:c.T1249C:p.S417P,	rs75907560	0.0267572	.	0.0101	0.003	0.0123	0.1111	0.0009	0.0005	0.0011	ID=COSM98855;OCCURENCE=1(stomach)	.	.	.	.	.	D	T	0.0140	0.014	0.0010	0.0149	0.1300	0.0210	0.0017	0.0211	0.0070	0.01	D	0.978
chr3	42914962	42914962	A	C	exonic	ZNF662	.	nonsynonymous SNV	ZNF662:NM_001134656:exon4:c.A967C:p.I323L	exonic	ENST00000440367.6;ZNF662	.	nonsynonymous SNV	ZNF662:ENST00000328199.6:exon4:c.A967C:p.I323L	exonic	ZNF662	.	nonsynonymous SNV	ZNF662:ENST00000328199.6:exon4:c.A967C:p.I323L	rs117564813	0.00119808	.	.	.	.	0.006	.	.	.	.	.	.	.	.	.	D	T	0.0003	0.0003	0	0	0.0044	0	0	0.0011	0.0001	0.04	D	0.988
chr3	45091385	45091385	C	T	exonic	CDCP1	.	nonsynonymous SNV	CDCP1:NM_022842:exon7:c.G1781A:p.R594Q,	exonic	ENST00000296129.5	.	nonsynonymous SNV	ENST00000296129.5:ENST00000296129.5:exon7:c.G1781A:p.R594Q,	exonic	CDCP1	.	unknown	UNKNOWN,	rs747034363	.	.	.	.	.	.	.	.	.	.	.	.	.	.	.	T	T	2.531e-05	2.531e-05	0	0	0.0002	0	1.531e-05	0	0	0.17	T	1.0
chr3	47124058	47124058	G	A	exonic	SETD2	.	nonsynonymous SNV	SETD2:NM_001349370:exon2:c.C446T:p.P149L	exonic	SETD2	.	nonsynonymous SNV	SETD2:ENST00000409792.3:exon3:c.C578T:p.P193L	exonic	SETD2	.	nonsynonymous SNV	SETD2:ENST00000409792.3:exon3:c.C578T:p.P193L,	rs77310684	0.00439297	.	.	.	.	0.0218	.	.	.	.	452728	not_provided	MedGen:CN517202	criteria_provided,_single_submitter	Benign	D	D	0.0008	0.0008	0.0004	0	0.0176	0	0	0	0.0006	0	D	0.996
chr3	49298619	49298619	G	A	exonic	USP4	.	nonsynonymous SNV	USP4:NM_199443:exon11:c.C1388T:p.P463L	exonic	ENST00000265560.8;USP4	.	nonsynonymous SNV	USP4:ENST00000351842.8:exon11:c.C1388T:p.P463L	exonic	USP4	.	nonsynonymous SNV	USP4:ENST00000351842.8:exon11:c.C1388T:p.P463L	rs199820956	0.000199681	.	.	.	.	0.001	.	.	.	.	.	.	.	.	.	D	T	4.943e-05	4.943e-05	0	0	0.0006	0	0	0	6.056e-05	0.08	T	1.0
chr3	49713818	49713818	G	A	exonic	RNF123	.	nonsynonymous SNV	RNF123:NM_022064:exon29:c.G2830A:p.E944K,	exonic	ENST00000327697.10;RNF123	.	nonsynonymous SNV	RNF123:ENST00000433785.1:exon3:c.G166A:p.E56K	exonic	RNF123	.	nonsynonymous SNV	RNF123:ENST00000433785.1:exon3:c.G166A:p.E56K,	rs117758999	0.000199681	.	.	.	.	0.001	7.7e-05	.	0.0001	.	.	.	.	.	.	T	T	0.0001	0.0001	0	0	0.0006	0	8.42e-05	0	6.632e-05	0.53	T	0.989
chr3	49809424	49809427	TGTT	-	exonic	UBA7	.	frameshift deletion	UBA7:NM_003335:exon17:c.2126_2129del:p.K709Sfs*45,	exonic	ENST00000333486.3	.	frameshift deletion	ENST00000333486.3:ENST00000333486.3:exon17:c.2126_2129del:p.K709Sfs*45,	exonic	UBA7	.	unknown	UNKNOWN,	rs767644153	.	.	.	.	.	.	0.0010	0.0007	0.0012	.	.	.	.	.	.	.	.	0.0006	0.0006	0.0003	0.0009	0	0	0.0008	0	6.075e-05	.	.	.
chr3	50295070	50295070	C	T	exonic	HYAL3	.	nonsynonymous SNV	HYAL3:NM_001200029:exon2:c.G533A:p.R178H	exonic	ENST00000336307.5;HYAL3	.	nonsynonymous SNV	ENST00000336307.5:ENST00000336307.5:exon2:c.G533A:p.R178H	exonic	HYAL3	.	nonsynonymous SNV	HYAL3:ENST00000359051.7:exon2:c.G533A:p.R178H	rs139756596	0.00539137	.	0.0086	0.002	0.0194	.	0.0035	0.0002	0.0051	.	.	.	.	.	.	D	T	0.0053	0.0053	0.0006	0.0045	0	0	0.0045	0.01	0.0171	0	D	1.0
chr3	51229554	51229554	G	A	exonic	DOCK3	.	nonsynonymous SNV	DOCK3:NM_004947:exon19:c.G1862A:p.R621Q,	exonic	ENST00000266037.9	.	nonsynonymous SNV	ENST00000266037.9:ENST00000266037.9:exon19:c.G1862A:p.R621Q,	exonic	DOCK3	.	unknown	UNKNOWN,	rs201762726	0.000399361	0.0015	.	.	.	.	0.0015	.	0.0022	.	720541	not_provided	MedGen:CN517202	criteria_provided,_single_submitter	Benign	T	T	0.0009	0.0009	0.0002	0	0	0.0002	0.0014	0.0011	0.0002	0.42	T	0.944
chr3	51713211	51713211	C	T	exonic	GRM2	.	nonsynonymous SNV	GRM2:NM_001349116:exon2:c.C55T:p.R19C	exonic	ENST00000395052.7;GRM2	.	nonsynonymous SNV	GRM2:ENST00000442933.2:exon2:c.C1189T:p.R397C	exonic	GRM2	.	nonsynonymous SNV	GRM2:ENST00000442933.2:exon2:c.C1189T:p.R397C,	rs200511797	.	.	.	.	.	.	7.7e-05	0.0002	.	.	.	.	.	.	.	D	D	9.235e-05	9.235e-05	0	8.685e-05	0	0	0.0001	0	6.065e-05	0	D	0.997
chr3	51873854	51873854	C	T	exonic	IQCF5	.	nonsynonymous SNV	IQCF5:NM_001145059:exon2:c.G326A:p.R109H,	exonic	ENST00000446461.1	.	nonsynonymous SNV	ENST00000446461.1:ENST00000446461.1:exon2:c.G326A:p.R109H,	exonic	IQCF5	.	unknown	UNKNOWN,	rs145166350	0.000998403	.	.	0.001	.	0.004	0.0002	.	0.0003	.	.	.	.	.	.	T	T	0.0002	0.0002	0	0	0.0032	0.0006	0.0001	0	0.0001	0.06	T	0.564
chr3	52199279	52199279	G	A	exonic	ALAS1	.	nonsynonymous SNV	ALAS1:NM_001304443:exon2:c.G38A:p.R13Q	exonic	ALAS1;ENST00000484952.5	.	nonsynonymous SNV	ALAS1:ENST00000310271.6:exon2:c.G38A:p.R13Q	exonic	ALAS1	.	nonsynonymous SNV	ALAS1:ENST00000310271.6:exon2:c.G38A:p.R13Q	rs35338461	0.00798722	0.0008	0.0029	0.003	0.0317	0.003	0.0028	0.0007	0.0040	.	698193	not_provided	MedGen:CN517202	criteria_provided,_single_submitter	Benign	T	D	0.0062	0.0062	0.0007	0.0017	0.0020	0.0012	0.0038	0.0022	0.0266	0.09	T	0.895
chr3	52229932	52229932	G	A	exonic	TWF2	.	nonsynonymous SNV	TWF2:NM_007284:exon7:c.C748T:p.L250F,	exonic	AC097637.1;ENST00000305533.9;TWF2	.	nonsynonymous SNV	ENST00000305533.9:ENST00000305533.9:exon7:c.C748T:p.L250F	exonic	RP11-330H6.5;TWF2	.	nonsynonymous SNV	TWF2:ENST00000499914.2:exon7:c.C748T:p.L250F,	rs114956852	0.000798722	.	.	.	0.001	0.003	.	.	.	.	.	.	.	.	.	T	T	0.0003	0.0003	0	0	0.0021	0.0003	0.0001	0.0011	0.0007	0.58	T	0.999
chr3	57415539	57415539	C	T	exonic	DNAH12	.	nonsynonymous SNV	DNAH12:NM_001366028:exon38:c.G5740A:p.G1914S,	exonic	DNAH12	.	nonsynonymous SNV	DNAH12:ENST00000351747.6:exon38:c.G5683A:p.G1895S	exonic	DNAH12	.	nonsynonymous SNV	DNAH12:ENST00000351747.6:exon38:c.G5683A:p.G1895S	rs189965161	0.00219649	0.0008	0.0014	0.0089	.	.	0.0059	0.0014	0.0079	.	.	.	.	.	.	D	D	0.0050	0.005	0.0028	0.0024	0	0	0.0088	0.0053	0.0020	0	D	1.0
chr3	64147176	64147176	C	G	exonic	PRICKLE2	.	nonsynonymous SNV	PRICKLE2:NM_001370528:exon7:c.G1314C:p.Q438H	exonic	ENST00000638394.1;PRICKLE2	.	nonsynonymous SNV	PRICKLE2:ENST00000564377.6:exon7:c.G1314C:p.Q438H	exonic	PRICKLE2	.	nonsynonymous SNV	PRICKLE2:ENST00000564377.6:exon7:c.G1314C:p.Q438H	rs202170644	0.000399361	.	.	0.002	.	.	0.0002	.	0.0003	.	426664	Rolandic_epilepsy|not_provided	MedGen:CN417132,Orphanet:ORPHA1945|MedGen:CN517202	criteria_provided,_conflicting_interpretations	Conflicting_interpretations_of_pathogenicity	.	.	0.0005	0.0005	9.628e-05	0.0002	0	0.0012	0.0008	0	0	0.06	T	0.681
chr3	70972152	70972152	T	C	exonic	FOXP1	.	nonsynonymous SNV	FOXP1:NM_001244810:exon18:c.A1559G:p.H520R,	exonic	FOXP1	.	nonsynonymous SNV	FOXP1:ENST00000648426.1:exon13:c.A1559G:p.H520R	exonic	FOXP1	.	nonsynonymous SNV	FOXP1:ENST00000615603.4:exon18:c.A1559G:p.H520R,	rs76145927	0.0091853	.	0.0058	0.003	.	0.0387	.	.	.	.	363694	not_provided	MedGen:CN517202	criteria_provided,_single_submitter	Likely_benign	.	.	0.0018	0.0018	0	0.0167	0.0354	0	0.0015	0.0152	0.0003	.	.	.
chr3	105534801	105534801	G	A	exonic	ALCAM	.	nonsynonymous SNV	ALCAM:NM_001243280:exon6:c.G686A:p.G229D	exonic	ALCAM	.	nonsynonymous SNV	ALCAM:ENST00000306107.9:exon6:c.G686A:p.G229D	exonic	ALCAM	.	nonsynonymous SNV	ALCAM:ENST00000306107.9:exon6:c.G686A:p.G229D	rs10933819	0.00199681	.	.	0.001	0.0031	0.006	0.0002	.	0.0002	.	.	.	.	.	.	T	T	0.0010	0.001	0	0.0004	0.0079	0	0.0004	0.0022	0.0008	0.06	T	1.0
chr3	113844621	113844621	A	G	exonic	GRAMD1C	.	nonsynonymous SNV	GRAMD1C:NM_017577:exon2:c.A146G:p.H49R,	exonic	ENST00000358160.8;GRAMD1C	.	nonsynonymous SNV	ENST00000358160.8:ENST00000358160.8:exon2:c.A146G:p.H49R	exonic	GRAMD1C	.	unknown	UNKNOWN,	rs552290581	0.000199681	.	.	.	0.001	.	.	.	.	.	.	.	.	.	.	D	T	0.0001	0.0001	0	0	0	0	6.006e-05	0	0.0007	0.62	T	0.736
chr3	119587602	119587602	G	A	exonic	ADPRH	.	stopgain	ADPRH:NM_001291950:exon3:c.G477A:p.W159X	exonic	ADPRH	.	stopgain	ADPRH:ENST00000465513.1:exon3:c.G798A:p.W266X	exonic	ADPRH	.	stopgain	ADPRH:ENST00000465513.1:exon3:c.G798A:p.W266X	rs144292904	0.000599042	.	.	0.003	.	.	0.0031	0.0007	0.0043	.	.	.	.	.	.	.	.	0.0028	0.0028	0.0004	0.0004	0	0.0038	0.0043	0.0066	0.0004	0.23	T	.
chr3	120167670	120167670	G	A	exonic	GPR156	.	nonsynonymous SNV	GPR156:NM_001168271:exon9:c.C1795T:p.R599W	exonic	GPR156	.	nonsynonymous SNV	GPR156:ENST00000315843.7:exon9:c.C1807T:p.R603W	exonic	GPR156	.	nonsynonymous SNV	GPR156:ENST00000315843.7:exon9:c.C1807T:p.R603W	rs143524747	0.000998403	.	.	0.005	.	.	0.0012	0.0014	0.0012	ID=COSM293744;OCCURENCE=1(large_intestine),1(urinary_tract)	.	.	.	.	.	D	T	0.0020	0.002	0.0009	0	0	0.0154	0.0019	0.0089	0	.	.	1.0
chr3	126852728	126852728	A	C	exonic	CHCHD6	.	nonsynonymous SNV	CHCHD6:NM_001320610:exon5:c.A496C:p.K166Q	exonic	CHCHD6;ENST00000290913.7	.	nonsynonymous SNV	ENST00000290913.7:ENST00000290913.7:exon5:c.A493C:p.K165Q	exonic	CHCHD6	.	nonsynonymous SNV	CHCHD6:ENST00000290913.7:exon5:c.A493C:p.K165Q	rs147083615	0.000599042	0.0015	0.0014	.	.	.	0.0007	.	0.0010	.	.	.	.	.	.	D	T	0.0006	0.0006	0.0004	0.0007	0	0	0.0007	0.0024	0.0009	0.1	T	0.999
chr3	129003923	129003923	C	A	exonic	EFCC1	.	nonsynonymous SNV	EFCC1:NM_024768:exon2:c.C826A:p.R276S,	exonic	EFCC1	.	nonsynonymous SNV	EFCC1:ENST00000436022.2:exon2:c.C826A:p.R276S,	exonic	EFCC1	.	nonsynonymous SNV	EFCC1:ENST00000436022.2:exon2:c.C826A:p.R276S,	rs142391828	0.0159744	.	.	0.001	0.0031	0.0754	.	.	.	.	.	.	.	.	.	.	.	0.0063	0.0063	0	0	0.2857	.	0	0	0.0035	0.11	T	0.761
chr3	130097207	130097207	G	A	exonic	ALG1L2	.	nonsynonymous SNV	ALG1L2:NM_001136152:exon7:c.G572A:p.R191H,	exonic	ALG1L2	.	nonsynonymous SNV	ALG1L2:ENST00000425059.1:exon7:c.G572A:p.R191H,	exonic	ALG1L2	.	nonsynonymous SNV	ALG1L2:ENST00000425059.1:exon7:c.G572A:p.R191H,	rs369951555	0.000199681	.	.	.	.	0.001	0.0002	.	0.0003	.	.	.	.	.	.	.	.	9.182e-05	9.182e-05	0.0003	0	0.0001	0	0.0001	0	0	.	.	.
chr3	132684574	132684574	C	T	exonic	NPHP3	.	nonsynonymous SNV	NPHP3:NM_153240:exon24:c.G3550A:p.A1184T,	exonic	ENST00000337331.9;NPHP3;NPHP3-ACAD11	.	nonsynonymous SNV	NPHP3:ENST00000512094.5:exon1:c.G112A:p.A38T	exonic	NPHP3	.	unknown	UNKNOWN,	rs34391943	0.00339457	.	0.0043	0.007	0.0061	0.001	0.0088	0.0007	0.0130	.	177218	Nephronophthisis|Meckel-Gruber_syndrome|Renal-hepatic-pancreatic_dysplasia_1|not_specified|not_provided	Human_Phenotype_Ontology:HP:0000090,MedGen:C0687120,Orphanet:ORPHA655,SNOMED_CT:204958008|MedGen:C0265215,Orphanet:ORPHA564,SNOMED_CT:29076005|MedGen:C3715199,OMIM:208540|MedGen:CN169374|MedGen:CN517202	criteria_provided,_conflicting_interpretations	Conflicting_interpretations_of_pathogenicity	D	D	0.0086	0.0086	0.0012	0.0011	0.0001	0.0127	0.0114	0.0155	0.0101	0.01	D	1.0
chr3	142823574	142823574	G	A	exonic	PCOLCE2	.	nonsynonymous SNV	PCOLCE2:NM_013363:exon7:c.C907T:p.R303W,	exonic	ENST00000295992.7;PCOLCE2	.	nonsynonymous SNV	PCOLCE2:ENST00000470310.5:exon2:c.C82T:p.R28W	exonic	PCOLCE2	.	unknown	UNKNOWN,	rs749513617	.	.	.	.	.	.	.	.	.	.	.	.	.	.	.	D	T	1.649e-05	1.649e-05	0	0	0	0	1.499e-05	0	6.059e-05	0.08	T	0.515
chr3	147396245	147396245	C	G	exonic	ZIC4	.	nonsynonymous SNV	ZIC4:NM_001168378:exon3:c.G445C:p.G149R	exonic	ZIC4	.	nonsynonymous SNV	ZIC4:ENST00000383075.7:exon3:c.G295C:p.G99R	exonic	ZIC4	.	nonsynonymous SNV	ZIC4:ENST00000383075.7:exon3:c.G295C:p.G99R	rs34676558	0.00519169	.	0.0058	0.0139	0.0082	.	0.0059	0.0021	0.0077	.	.	.	.	.	.	D	T	0.0071	0.0071	0.0017	0.0040	0.0001	0.0157	0.0087	0.0084	0.0065	0.03	D	0.997
chr3	148844497	148844497	G	A	exonic	CPB1	.	nonsynonymous SNV	CPB1:NM_001871:exon7:c.G596A:p.R199H,	exonic	CPB1;ENST00000282957.8	.	nonsynonymous SNV	CPB1:ENST00000468341.1:exon6:c.G494A:p.R165H	exonic	CPB1	.	nonsynonymous SNV	CPB1:ENST00000491148.5:exon8:c.G596A:p.R199H,	rs762474880	.	.	.	.	.	.	.	.	.	.	.	.	.	.	.	T	T	4.969e-05	4.969e-05	0.0002	0	0.0005	0	0	0	0	0.13	T	0.53
chr3	148883682	148883682	C	T	exonic	CPA3	.	nonsynonymous SNV	CPA3:NM_001870:exon9:c.C848T:p.T283M,	exonic	ENST00000296046.3	.	nonsynonymous SNV	ENST00000296046.3:ENST00000296046.3:exon9:c.C848T:p.T283M,	exonic	CPA3	.	unknown	UNKNOWN,	rs140470073	0.00299521	.	0.0043	0.0109	0.001	.	0.0052	0.0016	0.0071	.	697880	not_provided	MedGen:CN517202	criteria_provided,_single_submitter	Benign	D	T	0.0050	0.005	0.0013	0.0010	0	0.0106	0.0074	0.0066	0.0005	0.01	D	1.0
chr3	149767744	149767744	A	C	exonic	ANKUB1	.	nonsynonymous SNV	ANKUB1:NM_001144960:exon5:c.T918G:p.I306M	exonic	ANKUB1;ENST00000446160.6	.	nonsynonymous SNV	ENST00000446160.6:ENST00000446160.6:exon5:c.T918G:p.I306M	exonic	ANKUB1	.	nonsynonymous SNV	ANKUB1:ENST00000446160.6:exon5:c.T918G:p.I306M	rs3821406	0.047524	0.0477	0.0187	0.002	0.0061	0.1528	0.0142	0.0441	0.0013	.	.	.	.	.	.	T	T	0.0143	0.0143	0.0445	0.0268	0.1479	0	0.0014	0.0316	0.0083	0.04	D	0.906
chr3	160438412	160438412	G	A	exonic	TRIM59	.	nonsynonymous SNV	TRIM59:NM_173084:exon3:c.C772T:p.R258C,	exonic	AC079594.2;ENST00000309784.8;TRIM59	.	nonsynonymous SNV	TRIM59:ENST00000543469.1:exon2:c.C772T:p.R258C	exonic	RP11-432B6.3;TRIM59	.	nonsynonymous SNV	TRIM59:ENST00000543469.1:exon2:c.C772T:p.R258C	rs150969319	0.00119808	0.0008	.	0.003	0.002	.	0.0030	0.0014	0.0038	.	.	.	.	.	.	D	T	0.0029	0.0029	0.0009	0.0013	0	0.0014	0.0041	0.0033	0.0022	.	.	0.474
chr3	183269803	183269803	G	A	exonic	B3GNT5	.	nonsynonymous SNV	B3GNT5:NM_032047:exon2:c.G5A:p.R2K,	exonic	B3GNT5;ENST00000326505.3	.	nonsynonymous SNV	ENST00000326505.3:ENST00000326505.3:exon2:c.G5A:p.R2K	exonic	B3GNT5	.	nonsynonymous SNV	B3GNT5:ENST00000460419.1:exon2:c.G5A:p.R2K	rs115825683	0.00339457	.	0.0029	0.0099	0.0051	.	0.0096	0.0016	0.0137	.	.	.	.	.	.	T	T	0.0101	0.0101	0.0013	0.0032	0.0002	0.0109	0.0136	0.0073	0.0121	0	D	0.988
chr3	185491625	185491625	C	T	exonic	TMEM41A	.	nonsynonymous SNV	TMEM41A:NM_080652:exon5:c.G707A:p.G236E,	exonic	ENST00000421852.5	.	nonsynonymous SNV	ENST00000421852.5:ENST00000421852.5:exon5:c.G707A:p.G236E,	exonic	TMEM41A	.	unknown	UNKNOWN,	rs139252054	0.00379393	0.0008	0.0058	0.0139	.	.	0.0069	0.0020	0.0094	.	.	.	.	.	.	D	.	0.0082	0.0082	0.0022	0.0056	0.0001	0.0077	0.0114	0.0066	0.0055	0.94	T	0.984
chr3	186717708	186717708	T	G	exonic	KNG1	.	nonsynonymous SNV	KNG1:NM_000893:exon1:c.T166G:p.L56V	exonic	ENST00000265023.9;ENST00000645909.1;KNG1	.	nonsynonymous SNV	ENST00000265023.9:ENST00000265023.9:exon1:c.T166G:p.L56V	exonic	KNG1	.	nonsynonymous SNV	KNG1:ENST00000447445.1:exon1:c.T166G:p.L56V,	rs186409594	0.00119808	.	.	.	.	0.006	.	.	.	.	.	.	.	.	.	D	T	0.0006	0.0006	0	0	0.0073	0	0	0.0034	0	0.04	D	1.0
chr3	195070070	195070070	C	G	exonic	XXYLT1	.	nonsynonymous SNV	XXYLT1:NM_001308069:exon4:c.G389C:p.R130P	exonic	ENST00000310380.10;XXYLT1	.	nonsynonymous SNV	XXYLT1:ENST00000356740.5:exon2:c.G209C:p.R70P	exonic	XXYLT1	.	nonsynonymous SNV	XXYLT1:ENST00000356740.5:exon2:c.G209C:p.R70P	rs62290268	0.0129792	.	0.0115	0.004	0.0031	0.0496	0.0003	.	0.0004	.	.	.	.	.	.	T	T	0.0062	0.0062	0.0004	0.0091	0.0544	0.0050	0.0011	0.0051	0.0008	0.11	T	0.994
chr3	195774250	195774250	C	-	exonic	MUC4	.	frameshift deletion	MUC4:NM_138297:exon2:c.138delG:p.R46fs	exonic	ENST00000463781.7;MUC4	.	frameshift deletion	MUC4:ENST00000349607.8:exon2:c.138delG:p.T47Pfs*93	exonic	MUC4	.	frameshift deletion	MUC4:ENST00000349607.8:exon2:c.138delG:p.T47Pfs*93	rs758312073	.	.	.	.	.	.	0.0002	.	0.0004	.	.	.	.	.	.	.	.	0.0001	0.0001	0	0	0.0009	0	9.265e-05	0	0	.	.	.
chr3	195789613	195789613	G	T	exonic	MUC4	.	nonsynonymous SNV	MUC4:NM_018406:exon2:c.C1967A:p.S656Y	exonic	ENST00000463781.7;MUC4	.	nonsynonymous SNV	MUC4:ENST00000462323.5:exon2:c.C1967A:p.S656Y	exonic	MUC4	.	nonsynonymous SNV	MUC4:ENST00000475231.5:exon2:c.C1967A:p.S656Y,	rs3749330	0.000798722	.	.	.	.	0.004	.	.	.	.	.	.	.	.	.	D	T	9.108e-05	9.108e-05	0	0	0.0013	0	0	0	0	0.31	T	0.969
chr3	195867848	195867848	G	A	exonic	TNK2	.	nonsynonymous SNV	TNK2:NM_001308046:exon12:c.C2501T:p.P834L	exonic	ENST00000333602.11;ENST00000381916.6;ENST00000416152.5;ENST00000428187.5	.	nonsynonymous SNV	ENST00000416152.5:ENST00000416152.5:exon4:c.C1106T:p.P369L	exonic	TNK2	.	unknown	UNKNOWN,	rs3749333	.	.	.	.	.	.	7.9e-05	.	0.0001	.	.	.	.	.	.	T	T	8.758e-05	8.758e-05	0.0001	0	0.0004	0	5.563e-05	0	0.0001	0.05	D	0.997
chr3	197009723	197009723	G	A	exonic	MELTF	.	nonsynonymous SNV	MELTF:NM_005929:exon11:c.C1420T:p.R474C,	exonic	ENST00000296350.9	.	nonsynonymous SNV	ENST00000296350.9:ENST00000296350.9:exon11:c.C1420T:p.R474C,	exonic	MELTF	.	unknown	UNKNOWN,	rs369425612	0.000399361	.	0.0029	.	.	.	7.7e-05	0.0002	.	.	.	.	.	.	.	D	T	3.341e-05	3.341e-05	0	0.0002	0	0	1.527e-05	0.0011	0	0	D	1.0
chr4	682336	682336	G	C	exonic	SLC49A3	.	nonsynonymous SNV	SLC49A3:NM_001294342:exon8:c.C948G:p.S316R	exonic	SLC49A3	.	nonsynonymous SNV	SLC49A3:ENST00000347950.9:exon8:c.C948G:p.S316R	exonic	MFSD7	.	nonsynonymous SNV	MFSD7:ENST00000347950.9:exon8:c.C948G:p.S316R	rs111874868	0.00159744	.	0.0014	0.007	.	.	0.0042	0.0019	0.0054	.	.	.	.	.	.	D	T	0.0037	0.0037	0.0011	0.0008	0	0.0016	0.0056	0	0.0004	0.34	T	0.995
chr4	3492867	3492867	C	T	exonic	DOK7	.	nonsynonymous SNV	DOK7:NM_001363811:exon5:c.C449T:p.T150M	exonic	DOK7;ENST00000340083.5	.	nonsynonymous SNV	DOK7:ENST00000643608.1:exon5:c.C449T:p.T150M	exonic	DOK7	.	unknown	UNKNOWN,	rs151079259	.	.	.	.	.	.	7.7e-05	0.0002	.	ID=COSM1429472;OCCURENCE=1(large_intestine)	.	.	.	.	.	D	T	9.83e-05	9.83e-05	0.0003	0	0	0	9.989e-05	0	0.0001	0.17	T	0.885
chr4	6609189	6609189	G	A	exonic	MAN2B2	.	nonsynonymous SNV	MAN2B2:NM_001292038:exon12:c.G1744A:p.D582N	exonic	ENST00000285599.7;MAN2B2	.	nonsynonymous SNV	ENST00000285599.7:ENST00000285599.7:exon12:c.G1897A:p.D633N	exonic	MAN2B2	.	nonsynonymous SNV	MAN2B2:ENST00000285599.7:exon12:c.G1897A:p.D633N	rs762627882	.	.	.	.	.	.	.	.	.	.	.	.	.	.	.	T	D	1.652e-05	1.652e-05	0	0	0.0001	0	1.504e-05	0	0	0.38	T	0.967
chr4	8240825	8240825	G	A	exonic	SH3TC1	.	nonsynonymous SNV	SH3TC1:NM_001318480:exon18:c.G3653A:p.R1218H	exonic	ENST00000245105.7	.	nonsynonymous SNV	ENST00000245105.7:ENST00000245105.7:exon18:c.G3881A:p.R1294H,	exonic	SH3TC1	.	unknown	UNKNOWN,	rs143876832	0.00119808	.	.	.	0.002	0.004	0.0002	.	0.0002	.	.	.	.	.	.	D	T	0.0006	0.0006	0	0	0.0031	0	0.0004	0	0.0013	.	.	0.999
chr4	17642066	17642066	C	T	exonic	FAM184B	.	nonsynonymous SNV	FAM184B:NM_015688:exon13:c.G2509A:p.D837N,	exonic	ENST00000265018.3	.	nonsynonymous SNV	ENST00000265018.3:ENST00000265018.3:exon13:c.G2509A:p.D837N,	exonic	FAM184B	.	nonsynonymous SNV	FAM184B:ENST00000265018.3:exon13:c.G2509A:p.D837N,	rs541818051	0.000599042	.	.	.	.	0.003	.	.	.	.	.	.	.	.	.	T	T	0.0009	0.0009	0	0	0.0234	.	0	0	0.0009	0.3	T	0.728
chr4	37631405	37631405	G	A	exonic	RELL1	.	nonsynonymous SNV	RELL1:NM_001085399:exon6:c.C799T:p.R267C	exonic	ENST00000454158.6;RELL1	.	nonsynonymous SNV	RELL1:ENST00000314117.8:exon6:c.C799T:p.R267C	exonic	RELL1	.	nonsynonymous SNV	RELL1:ENST00000314117.8:exon6:c.C799T:p.R267C,	rs200027576	0.000199681	.	.	.	0.001	.	8e-05	.	0.0001	.	.	.	.	.	.	D	T	0.0006	0.0006	0	0	0	0	0.0002	0	0.0038	0.01	D	0.946
chr4	67634267	67634267	T	C	exonic	UBA6	.	nonsynonymous SNV	UBA6:NM_018227:exon22:c.A1988G:p.Y663C,	exonic	ENST00000322244.9;UBA6	.	nonsynonymous SNV	ENST00000322244.9:ENST00000322244.9:exon22:c.A1988G:p.Y663C,	exonic	UBA6	.	unknown	UNKNOWN,	rs145837626	0.000599042	.	.	.	0.0031	.	0.0008	0.0005	0.0010	.	.	.	.	.	.	T	T	0.0011	0.0011	0.0002	0.0005	0	0.0003	0.0011	0.0011	0.0026	0.04	D	0.943
chr4	78267298	78267298	G	A	exonic	FRAS1	.	nonsynonymous SNV	FRAS1:NM_001166133:exon9:c.G847A:p.G283R	exonic	ENST00000512123.3;FRAS1	.	nonsynonymous SNV	FRAS1:ENST00000325942.10:exon9:c.G847A:p.G283R	exonic	FRAS1	.	nonsynonymous SNV	FRAS1:ENST00000325942.10:exon9:c.G847A:p.G283R,	rs752345568	.	.	.	.	.	.	.	.	.	ID=COSM1057800,COSM294387,COSM294386;OCCURENCE=1(endometrium),1(large_intestine)	.	.	.	.	.	T	T	0.0001	0.0001	0	0	0.0002	0	9.177e-05	0	0.0003	0.84	T	0.746
chr4	102632215	102632215	C	T	exonic	MANBA	.	nonsynonymous SNV	MANBA:NM_005908:exon17:c.G2482A:p.V828I,	exonic	ENST00000226578.9;ENST00000647097.1;MANBA	.	nonsynonymous SNV	MANBA:ENST00000505239.1:exon16:c.G2311A:p.V771I	exonic	MANBA	.	nonsynonymous SNV	MANBA:ENST00000505239.1:exon16:c.G2311A:p.V771I,	rs75826658	0.00638978	0.0008	0.0101	0.0239	.	.	0.0129	0.0039	0.0176	.	296534	Beta-D-mannosidosis|not_provided	MedGen:C4048196,OMIM:248510,Orphanet:ORPHA118,SNOMED_CT:238047006|MedGen:CN517202	criteria_provided,_multiple_submitters,_no_conflicts	Benign/Likely_benign	D	T	0.0131	0.0131	0.0028	0.0055	0	0.0345	0.0181	0.0077	0.0035	0.01	D	0.999
chr4	112432277	112432277	A	C	exonic	ALPK1	.	nonsynonymous SNV	ALPK1:NM_001253884:exon10:c.A2496C:p.E832D	exonic	ALPK1;ENST00000458497.5	.	nonsynonymous SNV	ALPK1:ENST00000504176.6:exon10:c.A2496C:p.E832D	exonic	ALPK1	.	nonsynonymous SNV	ALPK1:ENST00000504176.6:exon10:c.A2496C:p.E832D	rs35308602	0.0139776	.	.	0.005	0.001	0.0635	0.0003	.	0.0005	.	.	.	.	.	.	D	T	0.0078	0.0078	0.0005	0.0002	0.0630	0.0333	0.0019	0.0077	0.0025	0.02	D	0.994
chr4	113311390	113311390	G	A	exonic	ANK2	.	nonsynonymous SNV	ANK2:NM_001354278:exon4:c.G311A:p.R104Q	exonic	ANK2;ENST00000357077.8;ENST00000503423.5	.	nonsynonymous SNV	ANK2:ENST00000509550.5:exon4:c.G311A:p.R104Q	exonic	ANK2	.	nonsynonymous SNV	ANK2:ENST00000509550.5:exon4:c.G311A:p.R104Q	rs751513548	.	.	.	.	.	.	.	.	.	ID=COSM159057;OCCURENCE=1(urinary_tract),1(breast)	188361	not_provided	MedGen:CN517202	criteria_provided,_single_submitter	Uncertain_significance	D	T	2.48e-05	2.48e-05	0	0.0002	0.0001	0	0	0	0	0.14	T	0.999
chr4	139719354	139719354	T	C	exonic	MAML3	.	nonsynonymous SNV	MAML3:NM_018717:exon5:c.A3386G:p.Q1129R,	exonic	MAML3	.	nonsynonymous SNV	MAML3:ENST00000509479.6:exon5:c.A3386G:p.Q1129R,	exonic	MAML3	.	nonsynonymous SNV	MAML3:ENST00000509479.6:exon5:c.A3386G:p.Q1129R,	rs781681279	.	.	.	.	.	.	.	.	.	.	.	.	.	.	.	T	T	1.752e-05	1.752e-05	0	0	0	0	3.082e-05	0	0	0.02	D	0.993
chr4	183705034	183705034	G	A	exonic	TRAPPC11	.	nonsynonymous SNV	TRAPPC11:NM_021942:exon27:c.G3019A:p.V1007M	exonic	ENST00000334690.10;TRAPPC11	.	nonsynonymous SNV	TRAPPC11:ENST00000512476.1:exon16:c.G1837A:p.V613M	exonic	TRAPPC11	.	nonsynonymous SNV	TRAPPC11:ENST00000512476.1:exon16:c.G1837A:p.V613M	rs79804817	0.00678914	.	0.0014	.	0.0041	0.0288	0.0005	0.0007	0.0003	ID=COSM149768;OCCURENCE=1(stomach)	251425	not_specified|not_provided	MedGen:CN169374|MedGen:CN517202	criteria_provided,_multiple_submitters,_no_conflicts	Benign/Likely_benign	D	.	0.0039	0.0039	9.617e-05	0.0003	0.0474	0.0029	0.0003	0.0044	0.0007	0.14	T	1.0
chr4	184661800	184661800	T	C	exonic	PRIMPOL	.	nonsynonymous SNV	PRIMPOL:NM_001300768:exon5:c.T305C:p.V102A	exonic	ENST00000314970.10;PRIMPOL	.	nonsynonymous SNV	ENST00000314970.10:ENST00000314970.10:exon5:c.T305C:p.V102A	exonic	PRIMPOL	.	nonsynonymous SNV	PRIMPOL:ENST00000503752.5:exon5:c.T305C:p.V102A	rs142122035	0.00439297	.	0.0043	0.0189	.	.	0.0087	0.0030	0.0116	.	.	.	.	.	.	D	T	0.0102	0.0102	0.0023	0.0033	0	0.0279	0.0145	0.0151	0.0006	0	D	1.0
chr4	185020690	185020690	A	G	exonic	HELT	.	nonsynonymous SNV	HELT:NM_001300781:exon4:c.A647G:p.D216G	exonic	HELT	.	nonsynonymous SNV	HELT:ENST00000338875.5:exon4:c.A902G:p.D301G	exonic	HELT	.	nonsynonymous SNV	HELT:ENST00000338875.5:exon4:c.A902G:p.D301G	rs562479325	0.000199681	.	.	.	.	0.001	.	.	.	.	.	.	.	.	.	D	T	1.748e-05	1.748e-05	0	0	0.0001	0	0	0.0012	0	0.16	T	0.997
chr4	186197538	186197538	G	A	exonic	CYP4V2	.	nonsynonymous SNV	CYP4V2:NM_207352:exon5:c.G610A:p.A204T,	exonic	ENST00000378802.4	.	nonsynonymous SNV	ENST00000378802.4:ENST00000378802.4:exon5:c.G610A:p.A204T,	exonic	CYP4V2	.	unknown	UNKNOWN,	rs61745524	0.00179712	0.0008	.	0.003	0.0041	0.001	0.0032	0.0007	0.0044	.	486367	not_provided	MedGen:CN517202	criteria_provided,_conflicting_interpretations	Conflicting_interpretations_of_pathogenicity	D	T	0.0029	0.0029	0.0008	0.0006	0.0001	0.0014	0.0037	0.0011	0.0045	0.07	T	0.988
chr5	7867117	7867117	C	T	exonic	FASTKD3	.	nonsynonymous SNV	FASTKD3:NM_024091:exon2:c.G967A:p.V323M,	exonic	ENST00000264669.9;FASTKD3	.	nonsynonymous SNV	FASTKD3:ENST00000507036.1:exon1:c.G967A:p.V323M	exonic	FASTKD3	.	unknown	UNKNOWN,	rs763871830	.	.	.	.	.	.	.	.	.	.	.	.	.	.	.	D	T	8.249e-06	8.249e-06	0	0	0	0	1.499e-05	0	0	0.18	T	1.0
chr5	17275443	17275443	C	T	exonic	BASP1	.	nonsynonymous SNV	BASP1:NM_001271606:exon2:c.C227T:p.A76V	exonic	BASP1;ENST00000322611.3	.	nonsynonymous SNV	ENST00000322611.3:ENST00000322611.3:exon2:c.C227T:p.A76V	exonic	BASP1	.	nonsynonymous SNV	BASP1:ENST00000616743.1:exon2:c.C227T:p.A76V,	rs3733748	0.00499201	.	.	0.002	0.0082	0.0149	0.0003	0.0002	0.0004	.	.	.	.	.	.	D	T	0.0072	0.0072	0.0013	0	0.0353	0.0125	0.0049	0	0.0101	0.11	T	0.704
chr5	55108225	55108225	G	T	exonic	GZMA	.	nonsynonymous SNV	GZMA:NM_006144:exon4:c.G458T:p.W153L,	exonic	ENST00000274306.6	.	nonsynonymous SNV	ENST00000274306.6:ENST00000274306.6:exon4:c.G458T:p.W153L,	exonic	GZMA	.	unknown	UNKNOWN,	rs2270627	0.0101837	.	.	.	0.001	0.0496	0.0002	0.0005	.	.	.	.	.	.	.	D	T	0.0035	0.0035	0.0004	8.675e-05	0.0466	0.0003	0.0001	0.0044	0.0004	0	D	1.0
chr5	55127327	55127327	G	A	exonic	CDC20B	.	nonsynonymous SNV	CDC20B:NM_001145734:exon8:c.C919T:p.R307W	exonic	CDC20B	.	nonsynonymous SNV	CDC20B:ENST00000296733.5:exon8:c.C919T:p.R307W	exonic	CDC20B	.	nonsynonymous SNV	CDC20B:ENST00000296733.5:exon8:c.C919T:p.R307W	rs145168670	0.00139776	0.0008	0.0014	0.004	0.001	.	0.0038	0.0011	0.0052	.	.	.	.	.	.	D	T	0.0043	0.0043	0.0008	0.0042	0.0003	0.0036	0.0063	0.0022	0.0007	0	D	0.999
chr5	55349627	55349627	C	G	exonic	MTREX	.	nonsynonymous SNV	MTREX:NM_015360:exon12:c.C1295G:p.S432C,	exonic	ENST00000230640.9	.	nonsynonymous SNV	ENST00000230640.9:ENST00000230640.9:exon12:c.C1295G:p.S432C,	exonic	SKIV2L2	.	unknown	UNKNOWN,	rs142958762	0.00219649	.	0.0014	0.0099	.	.	0.0037	0.0018	0.0047	.	.	.	.	.	.	D	T	0.0032	0.0032	0.0011	0.0023	0	0.0024	0.0042	0.0011	0.0034	0	D	1.0
chr5	56176157	56176157	A	T	exonic	ANKRD55	.	nonsynonymous SNV	ANKRD55:NM_024669:exon4:c.T307A:p.Y103N,	exonic	ANKRD55;ENST00000341048.8	.	nonsynonymous SNV	ANKRD55:ENST00000504958.6:exon3:c.T307A:p.Y103N	exonic	ANKRD55	.	nonsynonymous SNV	ANKRD55:ENST00000504958.6:exon3:c.T307A:p.Y103N	rs150154852	0.000199681	.	.	0.001	.	.	0.0006	.	0.0009	.	.	.	.	.	.	D	T	0.0006	0.0006	0	0.0003	0	0	0.0008	0	0.0013	0.54	T	1.0
chr5	63961061	63961061	C	A	exonic	HTR1A	.	nonsynonymous SNV	HTR1A:NM_000524:exon1:c.G659T:p.R220L,	exonic	HTR1A	.	nonsynonymous SNV	HTR1A:ENST00000323865.4:exon1:c.G659T:p.R220L,	exonic	HTR1A	.	nonsynonymous SNV	HTR1A:ENST00000323865.4:exon1:c.G659T:p.R220L,	rs1800044	0.00279553	.	0.0115	0.003	0.0031	.	0.0040	0.0007	0.0057	.	.	.	.	.	.	T	T	0.0036	0.0036	0.0004	0.0010	0	0.0029	0.0052	0.0066	0.0031	0.82	T	0.76
chr5	64807670	64807670	G	A	exonic	CWC27	.	stopgain	CWC27:NM_001297645:exon11:c.G1010A:p.W337X,	exonic	CWC27	.	stopgain	CWC27:ENST00000508024.1:exon11:c.G1010A:p.W337X,	exonic	CWC27	.	stopgain	CWC27:ENST00000508024.1:exon11:c.G1010A:p.W337X,	rs114060499	0.0173722	0.0416	0.0043	0.005	0.0061	0.0179	.	.	.	.	.	.	.	.	.	.	.	0.0068	0.0068	0.0358	0	0.0253	0	0.0036	0	0.0059	1	T	.
chr5	71458855	71458855	G	C	exonic	BDP1	.	nonsynonymous SNV	BDP1:NM_018429:exon2:c.G489C:p.K163N,	exonic	BDP1;ENST00000358731.8	.	nonsynonymous SNV	ENST00000358731.8:ENST00000358731.8:exon2:c.G489C:p.K163N	exonic	BDP1	.	nonsynonymous SNV	BDP1:ENST00000380675.3:exon2:c.G489C:p.K163N,	rs62000371	.	.	.	.	.	.	8.4e-05	.	0.0001	.	.	.	.	.	.	D	T	8.409e-06	8.409e-06	0	0	0	0	1.516e-05	0	0	0.01	D	1.0
chr5	81113588	81113588	T	G	exonic	RASGRF2	.	nonsynonymous SNV	RASGRF2:NM_006909:exon15:c.T2138G:p.L713W,	exonic	ENST00000265080.8;RASGRF2	.	nonsynonymous SNV	ENST00000265080.8:ENST00000265080.8:exon15:c.T2138G:p.L713W	exonic	RASGRF2	.	unknown	UNKNOWN,	rs16878472	0.0257588	0.0575	0.0086	0.004	0.0389	0.005	0.0195	0.0438	0.0071	.	.	.	.	.	.	T	T	0.0141	0.0141	0.0463	0.0039	0.0030	0.0005	0.0082	0.0110	0.0368	0.19	T	0.975
chr5	83493674	83493674	G	A	exonic	VCAN	.	nonsynonymous SNV	VCAN:NM_001126336:exon4:c.G574A:p.G192R	exonic	ENST00000265077.7;VCAN	.	nonsynonymous SNV	ENST00000265077.7:ENST00000265077.7:exon4:c.G574A:p.G192R	exonic	VCAN	.	nonsynonymous SNV	VCAN:ENST00000342785.8:exon4:c.G574A:p.G192R	rs141008923	0.00159744	.	0.0014	0.007	.	.	0.0021	0.0005	0.0029	.	252022	Vitreoretinopathy|Wagner_syndrome|not_specified|not_provided	Human_Phenotype_Ontology:HP:0007773,MedGen:C1850109|MedGen:C0339540,OMIM:143200,SNOMED_CT:232064001|MedGen:CN169374|MedGen:CN517202	criteria_provided,_multiple_submitters,_no_conflicts	Likely_benign	D	T	0.0018	0.0018	0.0007	0.0010	0	0.0002	0.0029	0.0022	0.0002	0	D	1.0
chr5	94396384	94396384	A	T	exonic	KIAA0825	.	nonsynonymous SNV	KIAA0825:NM_001145678:exon17:c.T3013A:p.F1005I,	exonic	KIAA0825	.	nonsynonymous SNV	KIAA0825:ENST00000513200.7:exon16:c.T3013A:p.F1005I,	exonic	KIAA0825	.	nonsynonymous SNV	KIAA0825:ENST00000513200.7:exon16:c.T3013A:p.F1005I,	rs185381772	0.000998403	.	0.0029	.	.	0.003	.	.	.	.	.	.	.	.	.	T	T	0.0007	0.0007	0	0.0025	0.0016	0	0.0012	0	0.0003	0.14	T	0.617
chr5	132060755	132060755	G	A	exonic	IL3	.	nonsynonymous SNV	IL3:NM_000588:exon1:c.G49A:p.G17R,	exonic	ENST00000296870.2	.	nonsynonymous SNV	ENST00000296870.2:ENST00000296870.2:exon1:c.G49A:p.G17R,	exonic	IL3	.	nonsynonymous SNV	IL3:ENST00000296870.2:exon1:c.G49A:p.G17R,	rs781712251	.	.	.	.	.	.	.	.	.	.	.	.	.	.	.	D	T	8.243e-06	8.243e-06	0	0	0.0001	0	0	0	0	0	D	1.0
chr5	132327354	132327354	C	A	exonic	SLC22A4	.	nonsynonymous SNV	SLC22A4:NM_003059:exon5:c.C902A:p.A301E,	exonic	ENST00000200652.3	.	nonsynonymous SNV	ENST00000200652.3:ENST00000200652.3:exon5:c.C902A:p.A301E,	exonic	SLC22A4	.	unknown	UNKNOWN,	rs201521490	0.000199681	.	.	.	.	0.001	.	.	.	.	.	.	.	.	.	D	T	4.161e-05	4.161e-05	0	0	0	0	0	0	0.0003	0	D	0.997
chr5	138181443	138181443	G	A	exonic	KIF20A	.	nonsynonymous SNV	KIF20A:NM_005733:exon3:c.G187A:p.E63K,	exonic	ENST00000394894.7;KIF20A	.	nonsynonymous SNV	ENST00000394894.7:ENST00000394894.7:exon3:c.G187A:p.E63K	exonic	KIF20A	.	nonsynonymous SNV	KIF20A:ENST00000508792.5:exon3:c.G187A:p.E63K,	rs3734116	0.00798722	.	0.0159	0.006	.	0.0228	0.0003	0.0005	0.0002	.	721229	not_provided	MedGen:CN517202	criteria_provided,_single_submitter	Benign	D	T	0.0081	0.0081	0.0003	0.0352	0.0307	0.0237	0.0019	0.0143	0.0005	0.04	D	0.682
chr5	140366215	140366215	C	G	exonic	SLC4A9	.	nonsynonymous SNV	SLC4A9:NM_001258427:exon13:c.C1775G:p.A592G	exonic	ENST00000506757.6;SLC4A9	.	nonsynonymous SNV	SLC4A9:ENST00000506545.5:exon13:c.C1775G:p.A592G	exonic	SLC4A9	.	nonsynonymous SNV	SLC4A9:ENST00000506545.5:exon13:c.C1775G:p.A592G	rs34298619	0.00638978	.	0.013	0.0209	0.002	.	0.0094	0.0029	0.0126	.	.	.	.	.	.	T	T	0.0145	0.0145	0.0030	0.0079	0.0002	0.0351	0.0195	0.0112	0.0055	0.09	T	0.891
chr5	140808107	140808107	A	G	exonic	PCDHA4	.	nonsynonymous SNV	PCDHA4:NM_018907:exon1:c.A920G:p.Y307C	exonic	ENST00000530339.1;PCDHA4	.	nonsynonymous SNV	PCDHA4:ENST00000512229.6:exon1:c.A920G:p.Y307C	exonic	PCDHA4	.	nonsynonymous SNV	PCDHA4:ENST00000512229.6:exon1:c.A920G:p.Y307C	rs145409201	0.00758786	.	0.0072	0.006	0.0276	.	0.0086	0.0014	0.0123	.	.	.	.	.	.	D	T	0.0129	0.0129	0.0017	0.0026	0.0001	0.0092	0.0144	0.0188	0.0290	0.04	D	0.891
chr5	140809124	140809124	G	T	exonic	PCDHA4	.	nonsynonymous SNV	PCDHA4:NM_018907:exon1:c.G1937T:p.R646L	exonic	ENST00000530339.1;PCDHA4	.	nonsynonymous SNV	PCDHA4:ENST00000512229.6:exon1:c.G1937T:p.R646L	exonic	PCDHA4	.	nonsynonymous SNV	PCDHA4:ENST00000512229.6:exon1:c.G1937T:p.R646L	rs147674000	0.00379393	.	0.0159	0.008	.	.	0.0066	0.0018	0.0091	.	.	.	.	.	.	D	T	0.0057	0.0057	0.0017	0.0034	0	0.0056	0.0086	0.0067	0.0012	0.01	D	0.776
chr5	141200261	141200261	G	A	exonic	PCDHB11	.	nonsynonymous SNV	PCDHB11:NM_018931:exon1:c.G487A:p.G163R,	exonic	ENST00000354757.4	.	nonsynonymous SNV	ENST00000354757.4:ENST00000354757.4:exon1:c.G487A:p.G163R,	exonic	PCDHB11	.	nonsynonymous SNV	PCDHB11:ENST00000354757.4:exon1:c.G487A:p.G163R,	rs61743184	0.00738818	0.0068	0.0231	0.0119	.	.	0.0108	0.0057	0.0134	.	.	.	.	.	.	D	T	0.0093	0.0093	0.0046	0.0067	0	0.0129	0.0132	0.0099	0.0019	0	D	1.0
chr5	145764943	145764943	A	T	exonic	PRELID2	.	stoploss	PRELID2:NM_205846:exon6:c.T532A:p.X178K	exonic	PRELID2	.	stoploss	PRELID2:ENST00000505416.5:exon6:c.T532A:p.X178K	exonic	PRELID2	.	stoploss	PRELID2:ENST00000505416.5:exon6:c.T532A:p.X178K	rs201058037	0.000399361	.	.	.	.	0.002	.	.	.	.	.	.	.	.	.	.	.	0.0002	0.0002	0	0	0.0021	0	0	0	0	.	.	.
chr5	146701063	146701063	T	C	exonic	PPP2R2B	.	nonsynonymous SNV	PPP2R2B:NM_181676:exon2:c.A159G:p.I53M	exonic	PPP2R2B	.	nonsynonymous SNV	PPP2R2B:ENST00000336640.10:exon2:c.A159G:p.I53M	exonic	PPP2R2B	.	nonsynonymous SNV	PPP2R2B:ENST00000336640.10:exon2:c.A159G:p.I53M	rs140556908	.	.	.	.	.	.	0.0004	.	0.0006	.	.	.	.	.	.	D	T	0.0005	0.0005	0	0	0	0.0020	0.0007	0	0	0.02	D	0.992
chr5	147279272	147279272	C	T	exonic	STK32A	.	nonsynonymous SNV	STK32A:NM_001112724:exon4:c.C134T:p.T45I	exonic	ENST00000397936.7;STK32A	.	nonsynonymous SNV	ENST00000397936.7:ENST00000397936.7:exon4:c.C134T:p.T45I	exonic	STK32A	.	nonsynonymous SNV	STK32A:ENST00000398523.3:exon4:c.C134T:p.T45I	rs776005093	.	.	.	.	.	.	.	.	.	.	.	.	.	.	.	D	T	9.985e-05	9.985e-05	0	0	0	0	0.0002	0	0	0	D	1.0
chr5	150374331	150374331	G	A	exonic	TCOF1	.	nonsynonymous SNV	TCOF1:NM_000356:exon7:c.G797A:p.S266N	exonic	ENST00000642994.1;TCOF1	.	nonsynonymous SNV	TCOF1:ENST00000323668.11:exon7:c.G797A:p.S266N	exonic	TCOF1	.	nonsynonymous SNV	TCOF1:ENST00000323668.11:exon7:c.G797A:p.S266N	rs144327167	0.000798722	.	0.0029	0.002	.	.	0.0011	0.0005	0.0014	.	205576	Treacher_Collins_syndrome_1|not_specified|Treacher_Collins_Syndrome,_Dominant|not_provided	MedGen:CN119605,OMIM:154500|MedGen:CN169374|MedGen:CN239287|MedGen:CN517202	criteria_provided,_multiple_submitters,_no_conflicts	Benign/Likely_benign	D	T	0.0035	0.0035	0.0003	0.0048	0	0.0231	0.0047	0.0076	0.0014	0.01	D	0.99
chr5	151049883	151049883	G	A	exonic	TNIP1	.	nonsynonymous SNV	TNIP1:NM_001252386:exon7:c.C628T:p.R210W	exonic	TNIP1	.	nonsynonymous SNV	TNIP1:ENST00000519339.5:exon6:c.C628T:p.R210W	exonic	TNIP1	.	nonsynonymous SNV	TNIP1:ENST00000520931.5:exon7:c.C628T:p.R210W	rs117663772	0.00299521	.	.	.	.	0.0149	0.0003	.	0.0005	.	.	.	.	.	.	D	T	0.0023	0.0023	0	8.637e-05	0.0166	0.0054	0.0013	0.0110	0.0004	0.03	D	0.997
chr5	154034870	154034870	C	A	exonic	FAM114A2	.	nonsynonymous SNV	FAM114A2:NM_001317994:exon2:c.G84T:p.K28N	exonic	ENST00000351797.8;FAM114A2	.	nonsynonymous SNV	ENST00000351797.8:ENST00000351797.8:exon2:c.G84T:p.K28N	exonic	FAM114A2	.	nonsynonymous SNV	FAM114A2:ENST00000520313.5:exon2:c.G84T:p.K28N	rs138252960	.	.	.	.	.	.	7.7e-05	.	0.0001	ID=COSM1064710;OCCURENCE=1(endometrium)	.	.	.	.	.	D	T	4.943e-05	4.943e-05	0	0	0	0.0003	4.495e-05	0.0011	0	0.34	T	0.549
chr5	156850659	156850659	C	T	exonic	PPP1R2B	.	nonsynonymous SNV	PPP1R2B:NM_206858:exon1:c.C97T:p.R33C,	exonic	ENST00000522232.2	.	nonsynonymous SNV	ENST00000522232.2:ENST00000522232.2:exon1:c.C97T:p.R33C,	exonic	PPP1R2P3	.	nonsynonymous SNV	PPP1R2P3:ENST00000522232.2:exon1:c.C97T:p.R33C,	rs777253494	.	.	.	.	.	.	.	.	.	.	.	.	.	.	.	.	.	1.13e-05	1.13e-05	0	0	0	0	0	0	7.447e-05	.	.	.
chr5	160634288	160634288	C	T	exonic	ATP10B	.	nonsynonymous SNV	ATP10B:NM_001366658:exon7:c.G1363A:p.E455K	ncRNA_intronic	AC008456.1	.	.	.	ncRNA_intronic	CTC-348L5.1	.	.	.	rs778703602	.	.	.	.	.	.	.	.	.	.	.	.	.	.	.	.	.	1.683e-05	1.683e-05	0	0.0002	0	0	0	0	0	.	.	.
chr5	168529565	168529565	G	A	exonic	FBLL1	.	nonsynonymous SNV	FBLL1:NM_001355274:exon1:c.G61A:p.G21S,	exonic	ENST00000338333.4	.	nonsynonymous SNV	ENST00000338333.4:ENST00000338333.4:exon1:c.G61A:p.G21S,	exonic	FBLL1	.	nonsynonymous SNV	FBLL1:ENST00000338333.4:exon1:c.G61A:p.G21S,	rs199911358	0.0752796	0.0091	0.0908	0.1789	0.0532	0.0694	.	.	.	.	.	.	.	.	.	.	.	0	0	.	.	.	.	.	.	.	.	.	.
chr5	170909700	170909700	G	A	exonic	RANBP17	.	nonsynonymous SNV	RANBP17:NM_022897:exon6:c.G529A:p.A177T,	exonic	ENST00000523189.5;RANBP17	.	nonsynonymous SNV	RANBP17:ENST00000389118.8:exon6:c.G529A:p.A177T	exonic	RANBP17	.	unknown	UNKNOWN,	rs80184931	0.0123802	.	.	.	.	0.0615	0.0002	0.0007	.	ID=COSM249534;OCCURENCE=1(kidney)	.	.	.	.	.	D	T	0.0054	0.0054	0.0006	8.818e-05	0.0719	0.0002	0.0002	0.0044	0.0002	0.19	T	0.993
chr5	177091049	177091049	G	A	exonic	FGFR4	.	nonsynonymous SNV	FGFR4:NM_022963:exon4:c.G548A:p.R183H	exonic	ENST00000292408.8;FGFR4	.	nonsynonymous SNV	FGFR4:ENST00000393637.5:exon4:c.G548A:p.R183H	exonic	FGFR4	.	nonsynonymous SNV	FGFR4:ENST00000393637.5:exon4:c.G548A:p.R183H	rs149737957	0.000199681	.	.	.	0.001	.	0.0002	.	0.0002	.	.	.	.	.	.	T	T	0.0003	0.0003	0	0.0001	0.0001	0	0.0002	0.0013	0.0010	0.19	T	0.83
chr5	177307656	177307656	C	T	exonic	MXD3	.	nonsynonymous SNV	MXD3:NM_031300:exon6:c.G553A:p.E185K,	exonic	MXD3	.	nonsynonymous SNV	MXD3:ENST00000439742.6:exon6:c.G553A:p.E185K	exonic	MXD3	.	nonsynonymous SNV	MXD3:ENST00000439742.6:exon6:c.G553A:p.E185K	rs113162836	0.0185703	0.0386	0.0202	0.0099	0.0184	.	0.0164	0.0336	0.0076	.	.	.	.	.	.	D	T	0.0130	0.013	0.0376	0.0080	0.0002	0.0008	0.0091	0.0148	0.0286	0.01	D	0.954
chr5	178185898	178185898	C	A	exonic	GMCL2	.	nonsynonymous SNV	GMCL2:NM_001358008:exon1:c.G1402T:p.V468L,	exonic	GMCL2	.	nonsynonymous SNV	GMCL2:ENST00000463439.2:exon1:c.G1402T:p.V468L,	intergenic	NHP2;HNRNPAB	dist=31931;dist=18609	.	.	rs138663781	0.0061901	.	0.0058	0.0089	0.0184	.	.	.	.	.	.	.	.	.	.	.	.	0.0115	0.0115	0.0017	0.0112	0.0002	0.0020	0.0127	0.0177	0.0222	.	.	.
chr6	7229941	7229941	C	G	exonic	RREB1	.	nonsynonymous SNV	RREB1:NM_001003698:exon10:c.C1842G:p.I614M	exonic	ENST00000379938.6;RREB1	.	nonsynonymous SNV	RREB1:ENST00000334984.10:exon10:c.C1842G:p.I614M	exonic	RREB1	.	nonsynonymous SNV	RREB1:ENST00000334984.10:exon10:c.C1842G:p.I614M	rs146678576	0.000399361	.	0.0029	.	.	.	0.0005	0.0005	0.0005	.	735744	not_provided	MedGen:CN517202	criteria_provided,_single_submitter	Likely_benign	T	T	0.0007	0.0007	0.0001	0.0007	0	0	0.0012	0	6.53e-05	0.15	T	0.999
chr6	16327672	16327672	C	A	exonic	ATXN1	.	nonsynonymous SNV	ATXN1:NM_001128164:exon7:c.G639T:p.Q213H	exonic	ATXN1	.	nonsynonymous SNV	ATXN1:ENST00000436367.5:exon7:c.G639T:p.Q213H	exonic	ATXN1	.	nonsynonymous SNV	ATXN1:ENST00000436367.5:exon7:c.G639T:p.Q213H	rs3817753	.	.	.	.	.	.	.	.	.	.	133951	not_specified	MedGen:CN169374	no_assertion_criteria_provided	Likely_benign	T	T	0.0031	0.0031	0.0007	0.0012	0.0081	0.0005	0.0012	0.0108	0.0096	0.12	T	.
chr6	17637335	17637335	G	C	exonic	NUP153	.	nonsynonymous SNV	NUP153:NM_001278210:exon15:c.C2156G:p.T719R	exonic	NUP153	.	nonsynonymous SNV	NUP153:ENST00000613258.4:exon15:c.C2156G:p.T719R	exonic	NUP153	.	nonsynonymous SNV	NUP153:ENST00000613258.4:exon15:c.C2156G:p.T719R	rs144688186	0.000599042	.	0.0014	0.002	.	.	0.0008	.	0.0013	.	.	.	.	.	.	D	T	0.0009	0.0009	0.0002	0.0006	0	0.0002	0.0014	0	6.056e-05	0.1	T	0.579
chr6	29440815	29440815	C	T	exonic	OR10C1	.	nonsynonymous SNV	OR10C1:NM_013941:exon1:c.C800T:p.P267L,	exonic	OR10C1	.	nonsynonymous SNV	OR10C1:ENST00000444197.3:exon1:c.C800T:p.P267L	exonic	OR10C1	.	nonsynonymous SNV	OR10C1:ENST00000444197.3:exon1:c.C800T:p.P267L	rs150247833	0.000199681	.	.	0.001	.	.	.	.	.	.	.	.	.	.	.	T	T	0.0002	0.0002	0	0.0002	0	0	0.0003	0	0.0001	0.34	T	0.999
chr6	31138211	31138211	C	T	exonic	PSORS1C2	.	nonsynonymous SNV	PSORS1C2:NM_014069:exon2:c.G151A:p.G51S,	exonic	ENST00000259845.4	.	nonsynonymous SNV	ENST00000259845.4:ENST00000259845.4:exon2:c.G151A:p.G51S,	exonic	PSORS1C2	.	unknown	UNKNOWN,	rs2233951	0.0303514	.	0.0375	.	0.0389	0.0873	0.0004	0.0010	.	.	721942	not_provided	MedGen:CN517202	criteria_provided,_single_submitter	Benign	D	T	0.0091	0.0091	0.0003	0.0072	0.0764	0	0.0002	0.0045	0.0217	0	D	1.0
chr6	31143371	31143371	T	A	exonic	CCHCR1	.	nonsynonymous SNV	CCHCR1:NM_001105563:exon16:c.A2102T:p.K701M	exonic	CCHCR1	.	nonsynonymous SNV	CCHCR1:ENST00000396263.6:exon14:c.A1784T:p.K595M	exonic	CCHCR1	.	nonsynonymous SNV	CCHCR1:ENST00000396263.6:exon14:c.A1784T:p.K595M	rs116969494	0.0359425	.	0.0476	.	0.0429	0.1042	0.0007	0.0017	0.0002	.	.	.	.	.	.	D	T	0.0123	0.0123	0.0008	0.0164	0.0936	0.0012	0.0008	0.0023	0.0229	0.08	T	1.0
chr6	31744193	31744193	C	T	exonic	MSH5	.	stopgain	MSH5:NM_002441:exon7:c.C541T:p.R181X	exonic	ENST00000375750.7;ENST00000375755.7;MSH5;MSH5-SAPCD1	.	stopgain	MSH5:ENST00000450148.5:exon2:c.C52T:p.R18X	exonic	MSH5;MSH5-SAPCD1	.	stopgain	MSH5:ENST00000375703.7:exon7:c.C541T:p.R181X	rs147515280	.	.	.	.	.	.	0.0002	0.0002	0.0002	.	.	.	.	.	.	.	.	0.0001	0.0001	0.0002	0	0.0001	0.0002	0.0002	0	0	0.41	T	.
chr6	31811092	31811092	T	C	exonic	HSPA1L	.	nonsynonymous SNV	HSPA1L:NM_005527:exon2:c.A881G:p.D294G,	exonic	ENST00000375654.4	.	nonsynonymous SNV	ENST00000375654.4:ENST00000375654.4:exon2:c.A881G:p.D294G,	exonic	HSPA1L	.	unknown	UNKNOWN,	rs34360259	0.000399361	.	.	.	.	0.002	0.0002	.	0.0002	.	.	.	.	.	.	D	T	0.0001	0.0001	0	0	0.0014	0	7.492e-05	0	0	0	D	0.782
chr6	31865873	31865873	C	T	exonic	SLC44A4	.	nonsynonymous SNV	SLC44A4:NM_001178044:exon13:c.G1361A:p.R454H	exonic	ENST00000229729.10;SLC44A4	.	nonsynonymous SNV	SLC44A4:ENST00000375562.8:exon13:c.G1361A:p.R454H	exonic	SLC44A4	.	nonsynonymous SNV	SLC44A4:ENST00000375562.8:exon13:c.G1361A:p.R454H	rs201689147	.	.	.	.	.	.	0.0003	.	0.0005	.	.	.	.	.	.	D	T	0.0001	0.0001	0.0002	0	0	0	9.032e-05	0.0011	0.0004	.	.	0.886
chr6	31876097	31876097	A	G	exonic	SLC44A4	.	nonsynonymous SNV	SLC44A4:NM_001178044:exon3:c.T122C:p.F41S	exonic	ENST00000229729.10;SLC44A4	.	nonsynonymous SNV	ENST00000229729.10:ENST00000229729.10:exon3:c.T122C:p.F41S	exonic	SLC44A4	.	nonsynonymous SNV	SLC44A4:ENST00000375562.8:exon3:c.T122C:p.F41S,	rs376956552	.	.	.	.	.	.	7.7e-05	.	0.0001	.	.	.	.	.	.	D	T	8.281e-06	8.281e-06	0	0	0	0	1.505e-05	0	0	0	D	0.999
chr6	32335930	32335930	C	T	exonic	TSBP1	.	nonsynonymous SNV	TSBP1:NM_001286475:exon13:c.G364A:p.G122R	exonic	TSBP1	.	nonsynonymous SNV	TSBP1:ENST00000375007.8:exon13:c.G427A:p.G143R	exonic	C6orf10	.	nonsynonymous SNV	C6orf10:ENST00000375007.8:exon13:c.G427A:p.G143R	rs139993810	0.0107827	.	0.0173	0.008	0.0133	0.0208	0.0023	.	0.0035	.	.	.	.	.	.	D	T	0.0093	0.0093	0.0008	0.0190	0.0158	0.0255	0.0041	0.0162	0.0170	0.01	D	.
chr6	32349791	32349791	G	A	exonic	TSBP1	.	nonsynonymous SNV	TSBP1:NM_006781:exon9:c.C298T:p.L100F,	exonic	TSBP1	.	nonsynonymous SNV	TSBP1:ENST00000375007.8:exon9:c.C292T:p.L98F	exonic	C6orf10	.	nonsynonymous SNV	C6orf10:ENST00000375007.8:exon9:c.C292T:p.L98F	rs79044345	0.0105831	.	0.0173	0.007	0.0133	0.0208	0.0023	.	0.0035	.	.	.	.	.	.	D	T	0.0090	0.009	0.0008	0.0175	0.0156	0.0253	0.0040	0.0160	0.0169	.	.	0.662
chr6	33008236	33008236	G	-	exonic	HLA-DOA	.	frameshift deletion	HLA-DOA:NM_002119:exon2:c.108delC:p.A37Pfs*26,	exonic	ENST00000229829.6	.	frameshift deletion	ENST00000229829.6:ENST00000229829.6:exon2:c.108delC:p.A37Pfs*26,	exonic	HLA-DOA	.	unknown	UNKNOWN,	rs41541116	0.000599042	.	.	.	.	0.003	.	.	.	.	.	.	.	.	.	.	.	0.0003	0.0003	0	0	0.0045	0	0	0	6.183e-05	.	.	.
chr6	36225308	36225308	G	A	exonic	BRPF3	.	nonsynonymous SNV	BRPF3:NM_015695:exon11:c.G3223A:p.E1075K,	exonic	BRPF3	.	stopgain	BRPF3:ENST00000449261.6:exon9:c.G2409A:p.W803X,	exonic	BRPF3	.	nonsynonymous SNV	BRPF3:ENST00000534694.5:exon7:c.G2221A:p.E741K	rs142171063	0.00559105	.	0.0101	0.0109	0.0102	.	0.0083	0.0023	0.0114	.	.	.	.	.	.	D	T	0.0083	0.0083	0.0012	0.0049	0	0.0091	0.0105	0.0112	0.0103	0.11	T	0.998
chr6	38686957	38686957	C	G	exonic	GLO1	.	nonsynonymous SNV	GLO1:NM_006708:exon2:c.G102C:p.Q34H,	exonic	ENST00000373365.4	.	nonsynonymous SNV	ENST00000373365.4:ENST00000373365.4:exon2:c.G102C:p.Q34H,	exonic	GLO1	.	unknown	UNKNOWN,	rs372860215	.	.	.	.	.	.	7.7e-05	0.0002	.	.	.	.	.	.	.	T	T	7.451e-05	7.451e-05	9.81e-05	0	0	0.0002	0.0001	0	0	0.56	T	1.0
chr6	46167965	46167965	G	A	exonic	ENPP5	.	nonsynonymous SNV	ENPP5:NM_001290073:exon2:c.C16T:p.R6W	exonic	ENPP5;ENST00000371383.6	.	nonsynonymous SNV	ENPP5:ENST00000230565.3:exon2:c.C298T:p.R100W	exonic	ENPP5	.	nonsynonymous SNV	ENPP5:ENST00000230565.3:exon2:c.C298T:p.R100W,	rs201147736	0.000399361	.	.	.	0.001	0.001	.	.	.	.	.	.	.	.	.	T	T	7.416e-05	7.416e-05	0	0	0.0006	0	1.499e-05	0	0.0002	0.14	T	0.967
chr6	46709361	46709361	C	A	exonic	PLA2G7	.	nonsynonymous SNV	PLA2G7:NM_001168357:exon9:c.G835T:p.V279F	exonic	ENST00000274793.11;PLA2G7	.	nonsynonymous SNV	ENST00000274793.11:ENST00000274793.11:exon9:c.G835T:p.V279F	exonic	PLA2G7	.	nonsynonymous SNV	PLA2G7:ENST00000274793.11:exon9:c.G835T:p.V279F	rs76863441	0.0165735	.	.	.	.	0.0823	.	.	.	.	22953	Platelet-activating_factor_acetylhydrolase_deficiency	Human_Phenotype_Ontology:HP:0040175,MedGen:C3280315,OMIM:614278	no_assertion_criteria_provided	Pathogenic,_risk_factor	D	T	0.0048	0.0048	0	0.0002	0.0640	0.0002	0.0003	0.0011	0.0004	0	D	1.0
chr6	46863003	46863003	C	G	exonic	ADGRF5	.	nonsynonymous SNV	ADGRF5:NM_001098518:exon15:c.G2084C:p.S695T	exonic	ADGRF5;ENST00000283296.11	.	nonsynonymous SNV	ADGRF5:ENST00000265417.7:exon15:c.G2084C:p.S695T	exonic	ADGRF5	.	nonsynonymous SNV	ADGRF5:ENST00000265417.7:exon15:c.G2084C:p.S695T,	rs141610704	0.000399361	.	.	.	0.002	.	0.0014	.	0.0021	.	.	.	.	.	.	T	T	0.0026	0.0026	0.0003	0.0008	0	0.0023	0.0037	0.0022	0.0023	0.45	T	0.454
chr6	50840221	50840221	G	A	exonic	TFAP2B	.	nonsynonymous SNV	TFAP2B:NM_003221:exon6:c.G1006A:p.V336I,	exonic	ENST00000393655.3	.	nonsynonymous SNV	ENST00000393655.3:ENST00000393655.3:exon6:c.G1006A:p.V336I,	exonic	TFAP2B	.	unknown	UNKNOWN,	rs139339332	0.00219649	.	.	.	.	0.0109	7.7e-05	0.0002	.	.	307976	Char_syndrome|not_provided	MedGen:C1868570,OMIM:169100,Orphanet:ORPHA46627|MedGen:CN517202	criteria_provided,_multiple_submitters,_no_conflicts	Benign/Likely_benign	T	D	0.0009	0.0009	0	0	0.0119	0.0002	0	0	0.0004	0.24	T	0.957
chr6	54354609	54354609	T	C	exonic	TINAG	.	nonsynonymous SNV	TINAG:NM_014464:exon9:c.T1223C:p.L408P,	exonic	ENST00000259782.8	.	nonsynonymous SNV	ENST00000259782.8:ENST00000259782.8:exon9:c.T1223C:p.L408P,	exonic	TINAG	.	unknown	UNKNOWN,	rs112076007	.	.	.	.	.	.	7.7e-05	.	0.0001	.	.	.	.	.	.	T	D	0.0005	0.0005	0	0	0	0.0037	0.0006	0.0022	0	0.2	T	0.912
chr6	73808204	73808204	C	T	exonic	CD109	.	nonsynonymous SNV	CD109:NM_001159588:exon25:c.C3080T:p.A1027V	exonic	CD109;ENST00000287097.5	.	nonsynonymous SNV	CD109:ENST00000422508.6:exon25:c.C3080T:p.A1027V	exonic	CD109	.	nonsynonymous SNV	CD109:ENST00000422508.6:exon25:c.C3080T:p.A1027V	rs781030709	.	.	.	.	.	.	.	.	.	.	.	.	.	.	.	D	T	6.614e-05	6.614e-05	0	0	0.0003	0	6.012e-05	0	6.069e-05	0.04	D	1.0
chr6	75914821	75914821	G	A	exonic	MYO6	.	nonsynonymous SNV	MYO6:NM_001368136:exon32:c.G3571A:p.D1191N	exonic	ENST00000369975.5;ENST00000369977.7;ENST00000369985.8;ENST00000627432.2;MYO6	.	nonsynonymous SNV	ENST00000369975.5:ENST00000369975.5:exon31:c.G3571A:p.D1191N	exonic	MYO6	.	nonsynonymous SNV	MYO6:ENST00000369975.5:exon31:c.G3571A:p.D1191N	rs41269323	0.00559105	.	0.0086	0.008	0.0143	.	0.0091	0.0014	0.0130	.	54326	not_specified|Nonsyndromic_Hearing_Loss,_Dominant|Nonsyndromic_Hearing_Loss,_Recessive|not_provided	MedGen:CN169374|MedGen:CN239435|MedGen:CN239439|MedGen:CN517202	criteria_provided,_multiple_submitters,_no_conflicts	Benign/Likely_benign	D	D	0.0100	0.01	0.0011	0.0046	0	0.0126	0.0140	0.0121	0.0071	0	D	1.0
chr6	75947413	75947413	G	A	exonic	IMPG1	.	nonsynonymous SNV	IMPG1:NM_001282368:exon13:c.C1711T:p.L571F	exonic	ENST00000369950.7;IMPG1	.	nonsynonymous SNV	IMPG1:ENST00000611179.4:exon13:c.C1711T:p.L571F	exonic	IMPG1	.	nonsynonymous SNV	IMPG1:ENST00000611179.4:exon13:c.C1711T:p.L571F,	rs118155926	0.00139776	.	.	0.007	.	.	0.0010	.	0.0015	.	722148	not_provided	MedGen:CN517202	criteria_provided,_single_submitter	Benign	D	T	0.0048	0.0048	0.0002	8.696e-05	0	0.0453	0.0040	0.0121	0	0.11	T	0.996
chr6	108522354	108522354	C	T	exonic	AFG1L	.	nonsynonymous SNV	AFG1L:NM_001323005:exon12:c.C1234T:p.R412C	exonic	AFG1L;ENST00000368977.8	.	nonsynonymous SNV	ENST00000368977.8:ENST00000368977.8:exon13:c.C1375T:p.R459C,	exonic	LACE1	.	nonsynonymous SNV	LACE1:ENST00000368977.8:exon13:c.C1375T:p.R459C,	rs186962719	0.000199681	.	.	.	.	0.001	.	.	.	.	.	.	.	.	.	D	.	7.437e-05	7.437e-05	0	0	0.0006	0	4.507e-05	0	6.068e-05	0	D	1.0
chr6	109481881	109481881	C	T	exonic	ZBTB24	.	nonsynonymous SNV	ZBTB24:NM_001164313:exon2:c.G146A:p.R49Q	exonic	ZBTB24	.	nonsynonymous SNV	ZBTB24:ENST00000230122.3:exon2:c.G146A:p.R49Q,	exonic	ZBTB24	.	nonsynonymous SNV	ZBTB24:ENST00000230122.3:exon2:c.G146A:p.R49Q,	rs147441359	0.00439297	.	0.0101	0.0139	0.001	.	0.0063	0.0009	0.0091	.	246995	Kabuki_syndrome_1|not_specified|not_provided	MedGen:CN030661,OMIM:147920|MedGen:CN169374|MedGen:CN517202	criteria_provided,_conflicting_interpretations	Conflicting_interpretations_of_pathogenicity	T	T	0.0066	0.0066	0.0016	0.0072	0	0.0035	0.0096	0.0055	0.0024	.	.	0.999
chr6	138382503	138382503	A	G	exonic	SMIM28	.	nonsynonymous SNV	SMIM28:NM_001368163:exon2:c.A115G:p.T39A,	exonic	SMIM28	.	nonsynonymous SNV	SMIM28:ENST00000573100.1:exon2:c.A115G:p.T39A,	exonic	RP3-422G23.4	.	nonsynonymous SNV	RP3-422G23.4:ENST00000573100.1:exon2:c.A115G:p.T39A,	rs2076273	0.173323	0.4251	0.1383	0.0626	0.0583	0.0893	.	.	.	.	.	.	.	.	.	.	.	0	0	.	.	.	0	.	.	.	.	.	.
chr6	142134741	142134741	A	C	exonic	GJE1	.	nonsynonymous SNV	GJE1:NM_001358410:exon3:c.A437C:p.Y146S,	exonic	GJE1	.	nonsynonymous SNV	GJE1:ENST00000450456.2:exon3:c.A437C:p.Y146S,	exonic	GJE1	.	nonsynonymous SNV	GJE1:ENST00000450456.2:exon3:c.A437C:p.Y146S,	rs13192882	0.00259585	.	0.0086	0.007	.	.	.	.	.	.	.	.	.	.	.	D	D	0.0022	0.0022	0	0	0	0.0031	0.0029	0	0.0019	.	.	.
chr6	144421879	144421879	G	A	exonic	UTRN	.	nonsynonymous SNV	UTRN:NM_007124:exon3:c.G143A:p.S48N,	exonic	UTRN	.	nonsynonymous SNV	UTRN:ENST00000367545.7:exon3:c.G143A:p.S48N	exonic	UTRN	.	nonsynonymous SNV	UTRN:ENST00000367545.7:exon3:c.G143A:p.S48N,	rs114750149	0.00658946	0.0038	0.0115	0.0159	0.0041	.	0.0113	0.0032	0.0155	.	.	.	.	.	.	T	D	0.0101	0.0101	0.0029	0.0077	0	0.0046	0.0149	0.0129	0.0046	0.12	T	0.567
chr6	154822368	154822368	A	G	exonic	SCAF8	.	nonsynonymous SNV	SCAF8:NM_014892:exon16:c.A1885G:p.T629A	exonic	SCAF8	.	nonsynonymous SNV	SCAF8:ENST00000367178.7:exon16:c.A1885G:p.T629A	exonic	SCAF8	.	nonsynonymous SNV	SCAF8:ENST00000367178.7:exon16:c.A1885G:p.T629A	rs75282196	0.0147764	0.0371	0.0029	0.004	0.0174	0.002	0.0116	0.0268	0.0038	.	.	.	.	.	.	D	T	0.0077	0.0077	0.0285	0.0042	0.0031	0.0003	0.0037	0.0110	0.0187	0.79	T	0.868
chr6	160154805	160154805	G	A	exonic	SLC22A1	.	nonsynonymous SNV	SLC22A1:NM_003057:exon9:c.G1393A:p.G465R,	exonic	ENST00000366963.8;ENST00000642587.1	.	nonsynonymous SNV	ENST00000366963.8:ENST00000366963.8:exon9:c.G1393A:p.G465R	exonic	SLC22A1	.	unknown	UNKNOWN,	rs34059508	0.00658946	.	0.0187	0.0199	.	.	0.0184	0.0034	0.0260	.	.	.	.	.	.	D	T	0.0131	0.0131	0.0040	0.0064	0	0.0076	0.0206	0.0134	0.0025	0.01	D	1.0
chr6	165309585	165309585	A	G	exonic	C6orf118	.	startloss	C6orf118:NM_144980:exon1:c.T2C:p.M1?,	exonic	ENST00000230301.8	.	startloss	ENST00000230301.8:ENST00000230301.8:exon1:c.T2C:p.M1?,	exonic	C6orf118	.	unknown	UNKNOWN,	rs767584849	.	.	.	.	.	.	.	.	.	.	.	.	.	.	.	D	T	5.779e-05	5.779e-05	0	0	0	0.0006	4.505e-05	0	0	0	D	0.997
chr6	170561967	170561967	G	-	exonic	TBP	.	frameshift deletion	TBP:NM_001172085:exon2:c.171delG:p.Q57Hfs*67	exonic	ENST00000392092.6;TBP	.	frameshift deletion	TBP:ENST00000540980.5:exon2:c.171delG:p.Q57Hfs*67	exonic	TBP	.	frameshift deletion	TBP:ENST00000540980.5:exon2:c.171delG:p.Q57Hfs*67	rs770128377	.	.	.	.	.	.	.	.	.	.	.	.	.	.	.	.	.	0.0037	0.0037	0.0038	0.0026	0.0139	0.0002	0.0030	0.0056	0.0051	.	.	.
chr7	860183	860183	G	T	exonic	SUN1	.	nonsynonymous SNV	SUN1:NM_001171944:exon12:c.G1271T:p.G424V	exonic	ENST00000401592.5;SUN1	.	nonsynonymous SNV	SUN1:ENST00000429178.5:exon12:c.G1355T:p.G452V	exonic	SUN1	.	nonsynonymous SNV	SUN1:ENST00000452783.6:exon12:c.G1271T:p.G424V	rs77058871	0.0285543	.	.	.	0.002	0.1399	8.1e-05	0.0003	.	.	457965	not_provided	MedGen:CN517202	criteria_provided,_single_submitter	Benign	D	T	0.0097	0.0097	0.0004	0.0002	0.1329	0	2.999e-05	0.0045	0.0006	0.03	D	0.973
chr7	1548570	1548570	C	T	exonic	TMEM184A	.	nonsynonymous SNV	TMEM184A:NM_001097620:exon7:c.G763A:p.V255I,	exonic	ENST00000297477.9	.	nonsynonymous SNV	ENST00000297477.9:ENST00000297477.9:exon7:c.G763A:p.V255I,	exonic	TMEM184A	.	unknown	UNKNOWN,	rs150440402	0.00259585	.	0.0014	.	.	0.0119	.	.	.	.	.	.	.	.	.	D	T	0.0011	0.0011	0	8.649e-05	0.0152	0	0	0	0.0001	0.02	D	0.5
chr7	6035892	6035892	G	A	exonic	ANKRD61	.	nonsynonymous SNV	ANKRD61:NM_001271700:exon3:c.G763A:p.G255R,	exonic	ENST00000409061.1	.	nonsynonymous SNV	ENST00000409061.1:ENST00000409061.1:exon3:c.G763A:p.G255R,	exonic	ANKRD61	.	nonsynonymous SNV	ANKRD61:ENST00000409061.1:exon3:c.G763A:p.G255R,	rs76562932	0.0249601	.	.	0.001	0.0061	0.1171	.	.	.	.	.	.	.	.	.	T	T	0.0064	0.0064	0	0	0.1070	0.0037	0.0004	0.0108	0.0054	0.61	T	.
chr7	6508277	6508277	G	T	exonic	GRID2IP	.	nonsynonymous SNV	GRID2IP:NM_001145118:exon13:c.C2252A:p.P751Q,	exonic	GRID2IP	.	nonsynonymous SNV	GRID2IP:ENST00000435185.5:exon12:c.C1700A:p.P567Q	exonic	GRID2IP	.	nonsynonymous SNV	GRID2IP:ENST00000435185.5:exon12:c.C1700A:p.P567Q	rs184043502	0.00559105	0.0023	0.0043	0.0199	0.002	.	.	.	.	.	.	.	.	.	.	D	T	0.0128	0.0128	0.0043	0.004	0	0.1240	0.0190	0.0132	0.0025	0.03	D	0.856
chr7	15561797	15561797	G	A	exonic	AGMO	.	nonsynonymous SNV	AGMO:NM_001004320:exon1:c.C49T:p.R17C,	exonic	ENST00000342526.7	.	nonsynonymous SNV	ENST00000342526.7:ENST00000342526.7:exon1:c.C49T:p.R17C,	exonic	AGMO	.	unknown	UNKNOWN,	rs201065025	.	.	.	.	.	.	7.7e-05	.	0.0001	ID=COSM1087872;OCCURENCE=1(endometrium)	.	.	.	.	.	D	T	0.0002	0.0002	0	0	0.0002	0.0005	0.0002	0	6.092e-05	0.01	D	1.0
chr7	21600700	21600700	C	G	exonic	DNAH11	.	nonsynonymous SNV	DNAH11:NM_001277115:exon16:c.C3025G:p.L1009V,	exonic	DNAH11;ENST00000409508.7	.	nonsynonymous SNV	DNAH11:ENST00000328843.10:exon16:c.C3025G:p.L1009V	exonic	DNAH11	.	nonsynonymous SNV	DNAH11:ENST00000328843.10:exon16:c.C3025G:p.L1009V	rs542059067	0.000199681	.	.	.	.	0.001	.	.	.	.	.	.	.	.	.	T	T	5.078e-05	5.078e-05	0	0	0.0005	0	0	0	0.0001	0.82	T	0.999
chr7	23729140	23729140	C	T	exonic	STK31	.	nonsynonymous SNV	STK31:NM_001260504:exon6:c.C305T:p.S102F	exonic	ENST00000355870.7;STK31	.	nonsynonymous SNV	STK31:ENST00000354639.7:exon6:c.C305T:p.S102F	exonic	STK31	.	nonsynonymous SNV	STK31:ENST00000354639.7:exon6:c.C305T:p.S102F	rs56268851	0.000998403	.	.	.	.	0.005	.	.	.	.	.	.	.	.	.	D	T	0.0003	0.0003	0	0	0.0045	0	0	0	6.061e-05	0	D	1.0
chr7	33534125	33534125	C	T	exonic	BBS9	.	nonsynonymous SNV	BBS9:NM_001348044:exon17:c.C1999T:p.R667C	exonic	BBS9;ENST00000242067.10	.	nonsynonymous SNV	BBS9:ENST00000350941.7:exon19:c.C2350T:p.R784C	exonic	BBS9	.	nonsynonymous SNV	BBS9:ENST00000350941.7:exon19:c.C2350T:p.R784C	rs146752751	0.00738818	.	.	.	.	0.0367	0.0003	.	0.0005	.	512824	Bardet-Biedl_syndrome_1|not_provided	MedGen:C2936862,OMIM:209900|MedGen:CN517202	criteria_provided,_multiple_submitters,_no_conflicts	Benign	D	T	0.0026	0.0026	0	8.655e-05	0.0343	0	0.0002	0.0011	0.0002	0	D	1.0
chr7	43596072	43596072	A	C	exonic	STK17A	.	nonsynonymous SNV	STK17A:NM_004760:exon2:c.A378C:p.E126D,	exonic	ENST00000319357.5;STK17A	.	nonsynonymous SNV	ENST00000319357.5:ENST00000319357.5:exon2:c.A378C:p.E126D	exonic	STK17A	.	unknown	UNKNOWN,	rs56286238	0.00858626	.	0.0029	.	0.001	0.0397	0.0003	0.0005	0.0002	.	.	.	.	.	.	T	T	0.0031	0.0031	9.632e-05	0.0041	0.0344	0	0.0003	0.0011	0.0008	1	T	0.817
chr7	44539736	44539736	G	A	exonic	NPC1L1	.	nonsynonymous SNV	NPC1L1:NM_001101648:exon2:c.C661T:p.H221Y	exonic	NPC1L1	.	nonsynonymous SNV	NPC1L1:ENST00000289547.8:exon2:c.C661T:p.H221Y	exonic	NPC1L1	.	nonsynonymous SNV	NPC1L1:ENST00000289547.8:exon2:c.C661T:p.H221Y	rs114376659	0.00299521	.	.	0.0139	0.001	.	0.0054	0.0002	0.0080	.	.	.	.	.	.	T	D	0.0079	0.0079	0.0004	0.0003	0	0.0320	0.0104	0.0155	0.002	0.23	T	0.994
chr7	47283818	47283818	C	T	exonic	TNS3	.	nonsynonymous SNV	TNS3:NM_022748:exon28:c.G3976A:p.G1326S,	exonic	ENST00000311160.13	.	nonsynonymous SNV	ENST00000311160.13:ENST00000311160.13:exon28:c.G3976A:p.G1326S,	exonic	TNS3	.	unknown	UNKNOWN,	rs202189855	.	.	.	.	.	.	0.0010	0.0002	0.0013	.	.	.	.	.	.	D	T	0.0005	0.0005	0.0003	0	0	0.0002	0.0009	0	0	0	D	1.0
chr7	55201327	55201327	C	T	exonic	EGFR	.	nonsynonymous SNV	EGFR:NM_001346941:exon19:c.C2285T:p.T762M	exonic	EGFR;ENST00000275493.6	.	nonsynonymous SNV	EGFR:ENST00000454757.6:exon24:c.C2951T:p.T984M	exonic	EGFR	.	nonsynonymous SNV	EGFR:ENST00000454757.6:exon24:c.C2951T:p.T984M	rs182857647	0.000399361	.	.	0.001	0.001	.	.	.	.	.	.	.	.	.	.	D	T	5.78e-05	5.78e-05	0	0	0.0002	0	6.01e-05	0	6.061e-05	0.03	D	0.999
chr7	55846558	55846558	C	G	exonic	SEPTIN14	.	nonsynonymous SNV	SEPTIN14:NM_207366:exon3:c.G134C:p.R45T,	exonic	ENST00000388975.3	.	nonsynonymous SNV	ENST00000388975.3:ENST00000388975.3:exon3:c.G134C:p.R45T,	exonic	SEPT14	.	unknown	UNKNOWN,	rs146350220	0.0071885	.	0.0043	0.0099	0.0235	.	0.0035	0.0005	0.0049	.	.	.	.	.	.	D	T	0.0075	0.0075	0.0007	0.0022	0.0001	0.0142	0.0049	0.0089	0.0266	0	D	0.774
chr7	56019607	56019607	C	T	exonic	PSPH	.	nonsynonymous SNV	PSPH:NM_001370509:exon4:c.G268A:p.G90S	exonic	ENST00000275605.7;PSPH	.	nonsynonymous SNV	PSPH:ENST00000437355.6:exon3:c.G268A:p.G90S	exonic	PSPH	.	nonsynonymous SNV	PSPH:ENST00000395471.7:exon5:c.G268A:p.G90S,	rs75395437	0.000199681	0.0008	.	.	.	.	.	.	.	.	.	.	.	.	.	D	D	0.0051	0.0051	0.0189	0.0012	0.0046	0.0024	0.0015	0.0046	0.0162	0.01	D	0.999
chr7	73683272	73683272	T	C	exonic	DNAJC30	.	nonsynonymous SNV	DNAJC30:NM_032317:exon1:c.A152G:p.Y51C,	exonic	ENST00000395176.2	.	nonsynonymous SNV	ENST00000395176.2:ENST00000395176.2:exon1:c.A152G:p.Y51C,	exonic	DNAJC30	.	nonsynonymous SNV	DNAJC30:ENST00000395176.2:exon1:c.A152G:p.Y51C,	rs61732167	0.000199681	.	.	0.001	.	.	0.0006	.	0.0009	.	.	.	.	.	.	D	D	0.0009	0.0009	0	0	0	0.0039	0.0012	0.0011	0	0	D	1.0
chr7	76285776	76285776	G	A	exonic	SRRM3	.	nonsynonymous SNV	SRRM3:NM_001110199:exon15:c.G1895A:p.R632H,	exonic	ENST00000611745.1	.	nonsynonymous SNV	ENST00000611745.1:ENST00000611745.1:exon15:c.G1895A:p.R632H,	exonic	SRRM3	.	unknown	UNKNOWN,	rs117534220	0.0091853	.	.	.	.	0.0456	.	.	.	.	.	.	.	.	.	.	.	0.0014	0.0014	0.0006	0	0.0429	0	0	0	0.0003	0.06	T	0.973
chr7	89218189	89218189	T	C	exonic	ZNF804B	.	nonsynonymous SNV	ZNF804B:NM_181646:exon2:c.T143C:p.L48P,	exonic	ENST00000333190.4	.	nonsynonymous SNV	ENST00000333190.4:ENST00000333190.4:exon2:c.T143C:p.L48P,	exonic	ZNF804B	.	nonsynonymous SNV	ZNF804B:ENST00000333190.4:exon2:c.T143C:p.L48P,	rs777917115	.	.	.	.	.	.	.	.	.	.	.	.	.	.	.	D	T	8.242e-06	8.242e-06	0	0	0.0001	0	0	0	0	0	D	1.0
chr7	93131510	93131510	C	T	exonic	SAMD9L	.	nonsynonymous SNV	SAMD9L:NM_001303500:exon4:c.G4462A:p.V1488I	exonic	ENST00000318238.8;SAMD9L	.	nonsynonymous SNV	SAMD9L:ENST00000610760.1:exon2:c.G928A:p.V310I	exonic	SAMD9L	.	nonsynonymous SNV	SAMD9L:ENST00000610760.1:exon2:c.G928A:p.V310I	rs139478067	0.00139776	.	.	.	.	0.0069	0.0002	.	0.0002	.	736342	not_provided	MedGen:CN517202	criteria_provided,_single_submitter	Benign	T	T	0.0011	0.0011	9.614e-05	0	0.0131	0.0002	0.0002	0	0.0001	0.09	T	0.933
chr7	98246037	98246037	C	T	exonic	TECPR1	.	nonsynonymous SNV	TECPR1:NM_015395:exon3:c.G110A:p.R37H,	exonic	ENST00000447648.6;TECPR1	.	nonsynonymous SNV	TECPR1:ENST00000415086.5:exon3:c.G110A:p.R37H	exonic	TECPR1	.	nonsynonymous SNV	TECPR1:ENST00000447648.6:exon3:c.G110A:p.R37H,	rs79382137	0.00159744	.	.	.	0.002	0.006	.	.	.	.	.	.	.	.	.	D	T	0.0013	0.0013	0.0003	0.0008	0.0131	0	0	0.0028	0.0021	0.01	D	1.0
chr7	98246131	98246131	G	C	exonic	TECPR1	.	nonsynonymous SNV	TECPR1:NM_015395:exon3:c.C16G:p.L6V,	exonic	ENST00000447648.6;TECPR1	.	nonsynonymous SNV	TECPR1:ENST00000415086.5:exon3:c.C16G:p.L6V	exonic	TECPR1	.	nonsynonymous SNV	TECPR1:ENST00000447648.6:exon3:c.C16G:p.L6V,	rs79534220	0.0129792	.	0.0014	0.001	0.002	0.0605	8.1e-05	.	0.0001	.	.	.	.	.	.	D	T	0.0031	0.0031	0	0.0023	0.0631	0.0030	0.0007	0.0093	0.0015	0	D	1.0
chr7	100155117	100155117	G	A	exonic	MAP11	.	nonsynonymous SNV	MAP11:NM_001303470:exon11:c.C830T:p.S277F	exonic	ENST00000316937.7;MAP11	.	nonsynonymous SNV	MAP11:ENST00000457641.5:exon10:c.C830T:p.S277F	exonic	C7orf43	.	nonsynonymous SNV	C7orf43:ENST00000457641.5:exon10:c.C830T:p.S277F	rs755132096	.	.	.	.	.	.	.	.	.	.	.	.	.	.	.	D	T	4.166e-05	4.166e-05	0	0	0	0	7.575e-05	0	0	0	D	0.998
chr7	101043210	101043210	G	C	exonic	MUC17	.	nonsynonymous SNV	MUC17:NM_001040105:exon3:c.G11794C:p.G3932R,	exonic	ENST00000306151.8;MUC17	.	nonsynonymous SNV	ENST00000306151.8:ENST00000306151.8:exon3:c.G11794C:p.G3932R	exonic	MUC17	.	nonsynonymous SNV	MUC17:ENST00000306151.8:exon3:c.G11794C:p.G3932R,	rs74974199	0.0219649	.	0.0115	0.004	0.0082	0.0893	0.0004	.	0.0006	.	.	.	.	.	.	T	T	0.0133	0.0133	0.0004	0.0236	0.1249	0.0165	0.0013	0.0165	0.0027	0.48	T	0.998
chr7	106015196	106015196	C	-	exonic	CDHR3	.	frameshift deletion	CDHR3:NM_001301161:exon9:c.1046delC:p.P351Lfs*12	exonic	CDHR3;ENST00000317716.13	.	frameshift deletion	CDHR3:ENST00000466045.1:exon4:c.584delC:p.P197Lfs*12	exonic	CDHR3	.	frameshift deletion	CDHR3:ENST00000478080.5:exon9:c.1046delC:p.P351Lfs*12,	rs201638418	0.00159744	.	.	.	.	0.0079	.	.	.	ID=COSM1447074,COSM1447075;OCCURENCE=2(large_intestine)	.	.	.	.	.	.	.	0.0010	0.001	0	0	0.0088	0.0024	0.0003	0	9.152e-05	.	.	.
chr7	107690212	107690212	A	G	exonic	SLC26A4	.	nonsynonymous SNV	SLC26A4:NM_000441:exon10:c.A1238G:p.Q413R,	exonic	ENST00000265715.7;ENST00000644269.1	.	nonsynonymous SNV	ENST00000265715.7:ENST00000265715.7:exon10:c.A1238G:p.Q413R	exonic	SLC26A4	.	unknown	UNKNOWN,	rs142498437	.	.	.	.	.	.	7.7e-05	0.0002	.	.	357541	Pendred_syndrome	MedGen:C0271829,OMIM:274600,Orphanet:ORPHA705,SNOMED_CT:70348004	criteria_provided,_single_submitter	Likely_pathogenic	D	D	8.251e-06	8.251e-06	0	0	0	0	1.5e-05	0	0	0.05	D	0.998
chr7	117711772	117711772	G	A	exonic	CTTNBP2	.	nonsynonymous SNV	CTTNBP2:NM_001363349:exon23:c.C4703T:p.P1568L	exonic	CTTNBP2;ENST00000160373.7	.	nonsynonymous SNV	ENST00000160373.7:ENST00000160373.7:exon23:c.C4757T:p.P1586L,	exonic	CTTNBP2	.	unknown	UNKNOWN,	rs150547726	0.00139776	.	.	0.007	.	.	0.0037	0.0007	0.0052	.	.	.	.	.	.	D	T	0.0055	0.0055	0.0008	0.0017	0	0.0215	0.0069	0.0034	0.0017	0	D	1.0
chr7	128343721	128343721	T	C	exonic	RBM28	.	nonsynonymous SNV	RBM28:NM_001166135:exon1:c.A73G:p.S25G	exonic	RBM28	.	nonsynonymous SNV	RBM28:ENST00000223073.6:exon1:c.A73G:p.S25G	exonic	RBM28	.	nonsynonymous SNV	RBM28:ENST00000223073.6:exon1:c.A73G:p.S25G	rs148700418	0.000599042	.	.	.	.	0.003	.	.	.	.	.	.	.	.	.	D	T	0.0001	0.0001	0	0	0.0016	0	1.54e-05	0	0.0001	0.06	T	0.992
chr7	128865179	128865179	C	T	exonic	ATP6V1F	.	nonsynonymous SNV	ATP6V1F:NM_001198909:exon2:c.C218T:p.P73L,	exonic	ATP6V1F	.	nonsynonymous SNV	ATP6V1F:ENST00000492758.1:exon2:c.C218T:p.P73L,	exonic	ATP6V1F	.	nonsynonymous SNV	ATP6V1F:ENST00000492758.1:exon2:c.C218T:p.P73L,	rs117627878	0.00858626	0.0068	0.0086	0.0258	0.002	.	.	.	.	.	.	.	.	.	.	T	T	0.0103	0.0103	0.0081	0.0190	0	0.0476	0.0160	0.0185	0.0033	0.19	T	.
chr7	134199257	134199257	G	A	exonic	LRGUK	.	nonsynonymous SNV	LRGUK:NM_001365700:exon14:c.G1583A:p.R528H	exonic	LRGUK	.	nonsynonymous SNV	LRGUK:ENST00000285928.2:exon14:c.G1583A:p.R528H	exonic	LRGUK	.	nonsynonymous SNV	LRGUK:ENST00000285928.2:exon14:c.G1583A:p.R528H,	rs61753513	0.00299521	.	0.0043	0.0099	0.002	.	0.0056	0.0016	0.0077	.	.	.	.	.	.	D	T	0.0057	0.0057	0.0009	0.0022	0.0001	0.0165	0.0076	0.0077	0.0022	0.01	D	1.0
chr7	139231951	139231951	G	C	exonic	UBN2	.	nonsynonymous SNV	UBN2:NM_173569:exon1:c.G467C:p.R156P,	exonic	ENST00000473989.7	.	nonsynonymous SNV	ENST00000473989.7:ENST00000473989.7:exon1:c.G467C:p.R156P,	exonic	UBN2	.	unknown	UNKNOWN,	rs141209093	0.00519169	.	0.0101	0.0179	0.001	.	0.0065	0.0012	0.0090	.	710819	not_provided	MedGen:CN517202	criteria_provided,_single_submitter	Benign	D	T	0.0075	0.0075	0.0011	0.0062	0.0001	0.0105	0.0108	0.0074	0.0019	0.01	D	0.876
chr7	142867052	142867052	C	G	exonic	EPHB6	.	nonsynonymous SNV	EPHB6:NM_001280795:exon7:c.C855G:p.F285L	exonic	EPHB6	.	nonsynonymous SNV	EPHB6:ENST00000411471.6:exon7:c.C855G:p.F285L	exonic	EPHB6	.	nonsynonymous SNV	EPHB6:ENST00000411471.6:exon7:c.C855G:p.F285L	rs199910387	0.000199681	.	.	.	.	0.001	.	.	.	.	.	.	.	.	.	.	.	0.0002	0.0002	0	0.0002	0.0014	0	0.0001	0	6.073e-05	0.06	T	0.991
chr7	143286606	143286606	G	A	exonic	TMEM139	.	nonsynonymous SNV	TMEM139:NM_001282876:exon3:c.G428A:p.R143Q	exonic	ENST00000359333.7;TMEM139	.	nonsynonymous SNV	ENST00000359333.7:ENST00000359333.7:exon3:c.G428A:p.R143Q	exonic	TMEM139	.	nonsynonymous SNV	TMEM139:ENST00000409102.5:exon3:c.G428A:p.R143Q	rs61737885	0.00599042	0.0008	0.0187	0.0159	.	.	0.0158	0.0048	0.0214	.	.	.	.	.	.	D	.	0.0126	0.0126	0.0024	0.0092	0	0.0234	0.0183	0.0099	0.0006	0.06	T	0.499
chr7	143720311	143720312	CT	-	exonic	TCAF2	.	frameshift deletion	TCAF2:NM_001130026:exon2:c.760_761del:p.R254Kfs*33	exonic	TCAF2	.	frameshift deletion	TCAF2:ENST00000518791.6:exon1:c.409_410del:p.Q139Ifs*23	exonic	TCAF2	.	frameshift deletion	TCAF2:ENST00000425618.3:exon2:c.760_761del:p.Q256Ifs*23	rs751992631	.	.	.	.	.	.	0.0859	0.1585	0.0474	.	.	.	.	.	.	.	.	0	0	.	.	.	.	.	.	.	.	.	.
chr7	150467023	150467023	G	A	exonic	GIMAP8	.	nonsynonymous SNV	GIMAP8:NM_175571:exon2:c.G325A:p.E109K,	exonic	ENST00000307271.3	.	nonsynonymous SNV	ENST00000307271.3:ENST00000307271.3:exon2:c.G325A:p.E109K,	exonic	GIMAP8	.	unknown	UNKNOWN,	rs149849472	0.000399361	.	.	0.002	.	.	0.0024	0.0014	0.0029	.	.	.	.	.	.	T	T	0.0018	0.0018	0.0010	0.0018	0	0.0003	0.0027	0.0011	0	0.01	D	1.0
chr7	151086813	151086813	-	G	exonic	AGAP3	.	frameshift insertion	AGAP3:NM_001042535:exon1:c.73dupG:p.A25Gfs*105	exonic	AGAP3;ENST00000397238.6	.	frameshift insertion	ENST00000397238.6:ENST00000397238.6:exon1:c.73dupG:p.A25Gfs*105	exonic	AGAP3	.	frameshift insertion	AGAP3:ENST00000473312.5:exon1:c.73dupG:p.A25Gfs*105	rs539642617	0.998802	0.9977	1	1	1	0.997	0.9625	1	0.9524	.	.	.	.	.	.	.	.	0	0	.	.	.	.	.	.	.	.	.	.
chr7	151086830	151086830	T	G	exonic	AGAP3	.	nonsynonymous SNV	AGAP3:NM_001042535:exon1:c.T89G:p.L30R	exonic	AGAP3;ENST00000397238.6	.	nonsynonymous SNV	ENST00000397238.6:ENST00000397238.6:exon1:c.T89G:p.L30R	exonic	AGAP3	.	nonsynonymous SNV	AGAP3:ENST00000473312.5:exon1:c.T89G:p.L30R	rs775200524	.	.	.	.	.	.	.	.	.	.	.	.	.	.	.	T	D	0	0	.	.	.	.	.	.	.	0.18	T	.
chr7	151086835	151086835	-	GGGG	exonic	AGAP3	.	frameshift insertion	AGAP3:NM_001042535:exon1:c.94_95insGGGG:p.C32Wfs*99	exonic	AGAP3;ENST00000397238.6	.	frameshift insertion	ENST00000397238.6:ENST00000397238.6:exon1:c.94_95insGGGG:p.C32Wfs*99	exonic	AGAP3	.	frameshift insertion	AGAP3:ENST00000473312.5:exon1:c.94_95insGGGG:p.C32Wfs*99	rs766984834	.	.	.	.	.	.	.	.	.	.	.	.	.	.	.	.	.	0	0	.	.	.	.	.	.	.	.	.	.
chr7	158652371	158652371	G	C	exonic	NCAPG2	.	nonsynonymous SNV	NCAPG2:NM_001281933:exon23:c.C2856G:p.D952E	exonic	ENST00000356309.7;NCAPG2	.	nonsynonymous SNV	ENST00000356309.7:ENST00000356309.7:exon23:c.C2856G:p.D952E	exonic	NCAPG2	.	nonsynonymous SNV	NCAPG2:ENST00000356309.7:exon23:c.C2856G:p.D952E	rs80143472	0.0215655	.	.	.	0.0041	0.1032	0.0002	0.0005	.	.	722422	not_provided	MedGen:CN517202	criteria_provided,_single_submitter	Benign	D	T	0.0088	0.0088	0.0010	0.0003	0.1170	0	0.0002	0.0056	0.0018	0.13	T	0.991
chr7	158655163	158655163	T	G	exonic	NCAPG2	.	nonsynonymous SNV	NCAPG2:NM_001281933:exon21:c.A2601C:p.E867D	exonic	ENST00000356309.7;NCAPG2	.	nonsynonymous SNV	ENST00000356309.7:ENST00000356309.7:exon21:c.A2601C:p.E867D	exonic	NCAPG2	.	nonsynonymous SNV	NCAPG2:ENST00000356309.7:exon21:c.A2601C:p.E867D	rs3214000	0.0259585	.	.	.	0.0133	0.1161	0.0002	0.0005	.	.	.	.	.	.	.	D	T	0.0101	0.0101	0.0011	0.0004	0.1243	0	0.0002	0.0067	0.0072	0.2	T	0.66
chr8	2069280	2069280	C	T	exonic	MYOM2	.	nonsynonymous SNV	MYOM2:NM_003970:exon7:c.C656T:p.A219V,	exonic	ENST00000262113.8	.	nonsynonymous SNV	ENST00000262113.8:ENST00000262113.8:exon7:c.C656T:p.A219V,	exonic	MYOM2	.	unknown	UNKNOWN,	rs34823600	0.0131789	.	0.0173	0.0179	0.0072	0.0288	0.0089	0.0030	0.0120	.	.	.	.	.	.	D	T	0.0129	0.0129	0.0031	0.0180	0.0324	0.0026	0.0125	0.0122	0.0109	0.08	T	0.996
chr8	2129139	2129139	C	T	exonic	MYOM2	.	nonsynonymous SNV	MYOM2:NM_003970:exon32:c.C3707T:p.S1236L,	exonic	ENST00000262113.8;MYOM2	.	nonsynonymous SNV	MYOM2:ENST00000523438.1:exon19:c.C1982T:p.S661L	exonic	MYOM2	.	nonsynonymous SNV	MYOM2:ENST00000523438.1:exon19:c.C1982T:p.S661L,	rs200671811	.	.	.	.	.	.	7.7e-05	.	0.0001	.	.	.	.	.	.	D	T	0.0003	0.0003	0	0	0.0005	0.0038	0.0001	0.0011	0	0.23	T	0.878
chr8	2140794	2140794	G	T	exonic	MYOM2	.	nonsynonymous SNV	MYOM2:NM_003970:exon33:c.G3872T:p.C1291F,	exonic	ENST00000262113.8;MYOM2	.	nonsynonymous SNV	MYOM2:ENST00000523438.1:exon20:c.G2147T:p.C716F	exonic	MYOM2	.	nonsynonymous SNV	MYOM2:ENST00000523438.1:exon20:c.G2147T:p.C716F,	rs143646514	0.0107827	.	0.0245	0.003	.	0.0337	0.0004	0.0007	0.0002	.	.	.	.	.	.	T	T	0.0068	0.0068	0.0008	0.0282	0.0435	0.0045	0.0010	0.0066	0.0004	0.05	D	0.974
chr8	6926031	6926031	C	T	exonic	DEFA6	.	nonsynonymous SNV	DEFA6:NM_001926:exon1:c.G5A:p.R2K,	exonic	ENST00000297436.2	.	nonsynonymous SNV	ENST00000297436.2:ENST00000297436.2:exon1:c.G5A:p.R2K,	exonic	DEFA6	.	unknown	UNKNOWN,	rs75695501	0.000199681	.	.	.	.	0.001	.	.	.	.	.	.	.	.	.	T	T	3.471e-05	3.471e-05	0	0	0.0003	0	2.055e-05	0	0	0.13	T	0.558
chr8	10674727	10674727	C	A	exonic	C8orf74	.	nonsynonymous SNV	C8orf74:NM_001040032:exon2:c.C130A:p.L44M,	exonic	C8orf74;ENST00000304519.9	.	nonsynonymous SNV	ENST00000304519.9:ENST00000304519.9:exon2:c.C130A:p.L44M	exonic	C8orf74	.	unknown	UNKNOWN,	rs186803488	0.000199681	.	.	0.001	.	.	0.0002	.	0.0002	.	.	.	.	.	.	T	T	0.0013	0.0013	0	0	0	0.0112	0.0011	0.0113	8.506e-05	0.04	D	0.99
chr8	10697791	10697791	G	T	exonic	C8orf74	.	nonsynonymous SNV	C8orf74:NM_001040032:exon3:c.G434T:p.C145F,	exonic	ENST00000304519.9	.	nonsynonymous SNV	ENST00000304519.9:ENST00000304519.9:exon3:c.G434T:p.C145F,	exonic	C8orf74	.	unknown	UNKNOWN,	rs77073793	0.0249601	0.0015	0.0562	0.003	0.001	0.0794	0.0012	0.0002	0.0017	.	.	.	.	.	.	T	T	0.0147	0.0147	0.0021	0.0614	0.0771	0.0218	0.0028	0.0201	0.0021	0.68	T	0.97
chr8	17753952	17753952	C	T	exonic	MTUS1	.	nonsynonymous SNV	MTUS1:NM_001001924:exon2:c.G1856A:p.S619N	exonic	MTUS1	.	nonsynonymous SNV	MTUS1:ENST00000519263.5:exon1:c.G1856A:p.S619N	exonic	MTUS1	.	nonsynonymous SNV	MTUS1:ENST00000519263.5:exon1:c.G1856A:p.S619N	rs147931629	0.000199681	.	.	.	.	0.001	.	.	.	.	.	.	.	.	.	D	T	8.28e-05	8.28e-05	0.0001	0	0.0007	0.0002	2.997e-05	0	0	0.11	T	0.739
chr8	22099293	22099293	G	T	exonic	FAM160B2	.	nonsynonymous SNV	FAM160B2:NM_001354250:exon9:c.G1081T:p.D361Y	exonic	ENST00000289921.7;FAM160B2	.	nonsynonymous SNV	ENST00000289921.7:ENST00000289921.7:exon9:c.G1084T:p.D362Y	exonic	FAM160B2	.	unknown	UNKNOWN,	rs199982834	0.00159744	.	.	.	0.001	0.0069	7.9e-05	.	0.0001	.	.	.	.	.	.	D	T	0.0008	0.0008	0	0	0.0064	0.0024	0.0003	0	0.0003	0.05	D	0.971
chr8	23316985	23316985	C	T	exonic	LOXL2	.	nonsynonymous SNV	LOXL2:NM_002318:exon9:c.G1600A:p.G534R,	exonic	ENST00000389131.7;LOXL2	.	nonsynonymous SNV	LOXL2:ENST00000523833.2:exon3:c.G302A:p.R101Q	exonic	LOXL2	.	nonsynonymous SNV	LOXL2:ENST00000389131.7:exon9:c.G1600A:p.G534R,	rs149587418	0.014377	.	0.0634	0.0089	.	0.0188	0.0012	0.0023	0.0007	.	.	.	.	.	.	D	T	0.0134	0.0134	0.0021	0.0942	0.0142	0.0353	0.0020	0.0170	0.0006	0	D	1.0
chr8	23568363	23568363	A	G	exonic	SLC25A37	.	nonsynonymous SNV	SLC25A37:NM_001317812:exon3:c.A28G:p.M10V	exonic	ENST00000519973.5;SLC25A37	.	nonsynonymous SNV	ENST00000519973.5:ENST00000519973.5:exon3:c.A481G:p.M161V	exonic	SLC25A37	.	unknown	UNKNOWN,	rs752005199	.	.	.	.	.	.	.	.	.	.	.	.	.	.	.	D	T	4.141e-05	4.141e-05	0	0	0	0	7.493e-05	0	0	0.07	T	0.988
chr8	25462137	25462137	C	T	exonic	CDCA2	.	nonsynonymous SNV	CDCA2:NM_001317906:exon3:c.C271T:p.R91C	exonic	CDCA2;ENST00000330560.7	.	nonsynonymous SNV	CDCA2:ENST00000380665.3:exon3:c.C271T:p.R91C	exonic	CDCA2	.	nonsynonymous SNV	CDCA2:ENST00000380665.3:exon3:c.C271T:p.R91C,	rs114645573	0.00119808	.	.	.	.	0.006	.	.	.	.	.	.	.	.	.	T	T	0.0009	0.0009	0.0002	8.637e-05	0.0120	0	4.495e-05	0.0011	6.057e-05	0.1	T	0.779
chr8	29071743	29071743	C	T	exonic	KIF13B	.	nonsynonymous SNV	KIF13B:NM_015254:exon39:c.G5095A:p.E1699K,	exonic	ENST00000524189.5;KIF13B	.	nonsynonymous SNV	KIF13B:ENST00000523130.1:exon4:c.G871A:p.E291K	exonic	KIF13B	.	unknown	UNKNOWN,	rs566786202	0.000199681	.	.	0.001	.	.	.	.	.	.	.	.	.	.	.	D	T	0.0004	0.0004	0	0	0	0.0180	0	0	0	0.32	T	0.988
chr8	37841673	37841673	-	G	exonic	ADGRA2	.	frameshift insertion	ADGRA2:NM_032777:exon19:c.3336dupG:p.S1116Lfs*150,	exonic	ADGRA2;ENST00000412232.2	.	frameshift insertion	ADGRA2:ENST00000315215.11:exon16:c.2685dupG:p.S899Lfs*150	exonic	ADGRA2	.	frameshift insertion	ADGRA2:ENST00000315215.11:exon16:c.2685dupG:p.S899Lfs*150	rs777745333	.	.	.	.	.	.	.	.	.	.	.	.	.	.	.	.	.	0.0004	0.0004	0	0	0	0	0.0010	0	0.0003	.	.	.
chr8	102651586	102651586	G	A	exonic	KLF10	.	nonsynonymous SNV	KLF10:NM_001032282:exon3:c.C713T:p.S238F	exonic	ENST00000285407.10;KLF10	.	nonsynonymous SNV	ENST00000285407.10:ENST00000285407.10:exon3:c.C746T:p.S249F	exonic	KLF10	.	nonsynonymous SNV	KLF10:ENST00000395884.3:exon3:c.C713T:p.S238F,	rs4734653	0.0299521	0.0008	0.0375	0.004	0.0031	0.1151	0.0015	0.0020	0.0013	.	.	.	.	.	.	D	T	0.0135	0.0135	0.0013	0.0372	0.1147	0.0054	0.0016	0.0099	0.0027	0.01	D	0.93
chr8	109401523	109401523	T	A	exonic	PKHD1L1	.	nonsynonymous SNV	PKHD1L1:NM_177531:exon14:c.T1308A:p.N436K,	exonic	ENST00000378402.9	.	nonsynonymous SNV	ENST00000378402.9:ENST00000378402.9:exon14:c.T1308A:p.N436K,	exonic	PKHD1L1	.	unknown	UNKNOWN,	rs142539426	0.00638978	.	.	0.002	0.001	0.0288	0.0002	.	0.0002	.	.	.	.	.	.	T	D	0.0035	0.0035	0	0	0.0323	0.0113	0.0007	0.0057	0.0010	0.41	T	0.709
chr8	119846995	119846995	A	C	exonic	DSCC1	.	nonsynonymous SNV	DSCC1:NM_024094:exon4:c.T572G:p.I191S,	exonic	ENST00000313655.4	.	nonsynonymous SNV	ENST00000313655.4:ENST00000313655.4:exon4:c.T572G:p.I191S,	exonic	DSCC1	.	unknown	UNKNOWN,	rs61753750	0.000998403	.	0.0043	0.002	.	.	0.0035	0.0005	0.0050	.	.	.	.	.	.	D	T	0.0036	0.0036	0.0004	0.0036	0	0.0006	0.0055	0.0055	0.0005	0.13	T	0.999
chr8	124082400	124082400	G	A	exonic	FER1L6	.	nonsynonymous SNV	FER1L6:NM_001039112:exon33:c.G4333A:p.E1445K,	exonic	FER1L6	.	nonsynonymous SNV	FER1L6:ENST00000522917.5:exon33:c.G4333A:p.E1445K,	exonic	FER1L6	.	nonsynonymous SNV	FER1L6:ENST00000522917.5:exon33:c.G4333A:p.E1445K,	rs767275946	.	.	.	.	.	.	.	.	.	.	.	.	.	.	.	D	T	5.768e-05	5.768e-05	0	0	0	0	0	0	0.0004	0	D	1.0
chr8	131039724	131039724	C	A	exonic	ADCY8	.	nonsynonymous SNV	ADCY8:NM_001115:exon1:c.G610T:p.A204S,	exonic	ADCY8;ENST00000286355.9	.	nonsynonymous SNV	ENST00000286355.9:ENST00000286355.9:exon1:c.G610T:p.A204S	exonic	ADCY8	.	nonsynonymous SNV	ADCY8:ENST00000377928.7:exon1:c.G610T:p.A204S,	rs75246765	0.0061901	0.0015	0.0029	0.0159	0.0112	.	0.0113	0.0030	0.0156	.	.	.	.	.	.	T	T	0.0138	0.0138	0.0019	0.0045	0.0002	0.0171	0.0166	0.0188	0.0224	0.89	T	0.982
chr8	141175286	141175286	C	G	exonic	DENND3	.	nonsynonymous SNV	DENND3:NM_001352890:exon14:c.C2362G:p.L788V	exonic	DENND3	.	nonsynonymous SNV	DENND3:ENST00000424248.2:exon12:c.C1966G:p.L656V	exonic	DENND3	.	nonsynonymous SNV	DENND3:ENST00000424248.2:exon12:c.C1966G:p.L656V	rs142301665	0.00539137	.	.	0.002	0.001	0.0238	0.0004	.	0.0006	.	.	.	.	.	.	D	T	0.0030	0.003	0.0003	0.0002	0.0351	0.0020	0.0005	0.0033	0.0006	0	D	0.982
chr8	143576460	143576460	G	A	exonic	NAPRT	.	nonsynonymous SNV	NAPRT:NM_001363146:exon6:c.C310T:p.R104C	exonic	ENST00000449291.6;NAPRT	.	nonsynonymous SNV	NAPRT:ENST00000340490.7:exon7:c.C994T:p.R332C	exonic	NAPRT	.	nonsynonymous SNV	NAPRT:ENST00000426292.7:exon7:c.C994T:p.R332C	rs35975875	0.00239617	0.0008	.	0.008	0.0031	.	0.0045	0.0009	0.0063	.	.	.	.	.	.	D	T	0.0051	0.0051	0.0011	0.0009	0	0.0066	0.0071	0.0082	0.0044	0	D	1.0
chr8	143720714	143720714	C	T	exonic	MAPK15	.	nonsynonymous SNV	MAPK15:NM_139021:exon9:c.C791T:p.T264M,	exonic	ENST00000338033.8	.	nonsynonymous SNV	ENST00000338033.8:ENST00000338033.8:exon9:c.C791T:p.T264M,	exonic	MAPK15	.	unknown	UNKNOWN,	rs146609910	0.00579073	0.0008	0.0231	0.002	.	0.0099	0.0004	0.0012	.	.	.	.	.	.	.	T	T	0.0057	0.0057	0.0004	0.0424	0.0142	0.0103	0.0009	0.0016	0.0009	0.05	D	0.968
chr8	143728286	143728286	C	T	exonic	FAM83H	.	nonsynonymous SNV	FAM83H:NM_198488:exon5:c.G1175A:p.G392D,	exonic	ENST00000388913.3;FAM83H	.	nonsynonymous SNV	ENST00000388913.3:ENST00000388913.3:exon5:c.G1175A:p.G392D,	exonic	FAM83H	.	unknown	UNKNOWN,	rs782648008	.	.	.	.	.	.	.	.	.	.	.	.	.	.	.	T	T	0.0006	0.0006	0	0	0	0	0.0020	0	0	0.6	T	0.985
chr8	143920928	143920928	C	T	exonic	PLEC	.	nonsynonymous SNV	PLEC:NM_201378:exon32:c.G8851A:p.E2951K	exonic	PLEC	.	nonsynonymous SNV	PLEC:ENST00000322810.8:exon32:c.G9304A:p.E3102K	exonic	PLEC	.	nonsynonymous SNV	PLEC:ENST00000322810.8:exon32:c.G9304A:p.E3102K	rs782058888	.	.	.	.	.	.	.	.	.	.	.	.	.	.	.	D	T	3.432e-05	3.432e-05	0	0.0002	0	0	1.567e-05	0	6.086e-05	0.02	D	0.908
chr8	143924452	143924452	C	T	exonic	PLEC	.	nonsynonymous SNV	PLEC:NM_201378:exon31:c.G5435A:p.R1812Q	exonic	PLEC	.	nonsynonymous SNV	PLEC:ENST00000322810.8:exon31:c.G5888A:p.R1963Q	exonic	PLEC	.	nonsynonymous SNV	PLEC:ENST00000322810.8:exon31:c.G5888A:p.R1963Q	rs147838690	0.00419329	0.0008	.	0.0149	0.0051	.	0.0060	0.0021	0.0076	.	98970	Epidermolysis_bullosa_simplex,_Ogna_type|Epidermolysis_bullosa_simplex_with_pyloric_atresia|Epidermolysa_bullosa_simplex_and_limb_girdle_muscular_dystrophy|Limb-girdle_muscular_dystrophy,_type_2Q|Epidermolysis_bullosa_simplex_with_nail_dystrophy|not_specified|not_provided	MedGen:C0432317,OMIM:131950,Orphanet:ORPHA79401,SNOMED_CT:398071000|MedGen:C2677349,OMIM:612138,Orphanet:ORPHA158684|MedGen:C2931072,OMIM:226670,Orphanet:ORPHA257|MedGen:C3150989,OMIM:613723,Orphanet:ORPHA254361|MedGen:C4225309,OMIM:616487|MedGen:CN169374|MedGen:CN517202	criteria_provided,_multiple_submitters,_no_conflicts	Benign	T	D	0.0144	0.0144	0.0040	0.0039	0	0.0851	0.0189	0.0169	0.0045	0.29	T	1.0
chr8	143924510	143924510	G	A	exonic	PLEC	.	nonsynonymous SNV	PLEC:NM_201378:exon31:c.C5377T:p.R1793C	exonic	PLEC	.	nonsynonymous SNV	PLEC:ENST00000322810.8:exon31:c.C5830T:p.R1944C	exonic	PLEC	.	nonsynonymous SNV	PLEC:ENST00000322810.8:exon31:c.C5830T:p.R1944C	rs781812050	.	.	.	.	.	.	.	.	.	.	457336	Epidermolysis_bullosa_simplex,_Ogna_type|Epidermolysis_bullosa_simplex_with_pyloric_atresia|Epidermolysa_bullosa_simplex_and_limb_girdle_muscular_dystrophy|Limb-girdle_muscular_dystrophy,_type_2Q|Epidermolysis_bullosa_simplex_with_nail_dystrophy	MedGen:C0432317,OMIM:131950,Orphanet:ORPHA79401,SNOMED_CT:398071000|MedGen:C2677349,OMIM:612138,Orphanet:ORPHA158684|MedGen:C2931072,OMIM:226670,Orphanet:ORPHA257|MedGen:C3150989,OMIM:613723,Orphanet:ORPHA254361|MedGen:C4225309,OMIM:616487	criteria_provided,_single_submitter	Uncertain_significance	D	D	8.931e-05	8.931e-05	0	0	0	0	0.0002	0	0	0	D	1.0
chr9	5549421	5549421	C	G	exonic	PDCD1LG2	.	nonsynonymous SNV	PDCD1LG2:NM_025239:exon4:c.C448G:p.L150V,	exonic	ENST00000397747.4	.	nonsynonymous SNV	ENST00000397747.4:ENST00000397747.4:exon4:c.C448G:p.L150V,	exonic	PDCD1LG2	.	nonsynonymous SNV	PDCD1LG2:ENST00000397747.4:exon4:c.C448G:p.L150V,	rs774062534	.	.	.	.	.	.	.	.	.	.	.	.	.	.	.	T	T	8.242e-06	8.242e-06	0	0	0	0	1.499e-05	0	0	0.11	T	0.996
chr9	32481341	32481341	C	T	exonic	DDX58	.	nonsynonymous SNV	DDX58:NM_014314:exon11:c.G1637A:p.R546Q,	exonic	DDX58;ENST00000379883.2	.	nonsynonymous SNV	DDX58:ENST00000379868.5:exon10:c.G1028A:p.R343Q	exonic	DDX58	.	nonsynonymous SNV	DDX58:ENST00000379868.5:exon10:c.G1028A:p.R343Q,	rs61752945	0.0113818	0.0204	0.0101	0.0089	0.0143	.	0.0151	0.0188	0.0131	.	700973	not_provided	MedGen:CN517202	criteria_provided,_single_submitter	Benign	D	T	0.0089	0.0089	0.0198	0.0061	0	0.0017	0.0098	0.0077	0.0079	0.28	T	1.0
chr9	33463257	33463257	G	A	exonic	NOL6	.	nonsynonymous SNV	NOL6:NM_022917:exon24:c.C3179T:p.T1060M,	exonic	ENST00000297990.8;NOL6	.	nonsynonymous SNV	NOL6:ENST00000379470.5:exon4:c.C341T:p.T114M	intronic	NOL6	.	.	.	rs116537880	0.00219649	.	.	0.005	.	0.006	0.0004	.	0.0006	.	.	.	.	.	.	T	T	0.0024	0.0024	0	0	0.0078	0.0104	0.0022	0.0101	0.0002	0.11	T	0.864
chr9	33467471	33467471	G	C	exonic	NOL6	.	nonsynonymous SNV	NOL6:NM_022917:exon13:c.C1648G:p.L550V	exonic	ENST00000297990.8;NOL6	.	nonsynonymous SNV	ENST00000297990.8:ENST00000297990.8:exon13:c.C1648G:p.L550V	exonic	NOL6	.	nonsynonymous SNV	NOL6:ENST00000379471.3:exon13:c.C1648G:p.L550V,	rs116483202	0.0141773	0.0008	.	0.005	0.0368	0.0288	0.0008	0.0002	0.0010	.	.	.	.	.	.	T	T	0.0072	0.0072	0.0005	8.676e-05	0.0246	0.0102	0.0025	0.0111	0.0248	0.52	T	0.901
chr9	35812102	35812107	ACCGCG	-	exonic	SPAG8	.	frameshift deletion	SPAG8:NM_001039592:exon1:c.41_44del:p.S14Yfs*3	exonic	ENST00000396638.6;SPAG8	.	frameshift deletion	SPAG8:ENST00000340291.6:exon1:c.41_44del:p.S14Yfs*3	exonic	SPAG8	.	frameshift deletion	SPAG8:ENST00000340291.6:exon1:c.41_44del:p.S14Yfs*3	rs141792834	0.0145767	.	.	0.0089	0.002	0.0615	0.0411	0.0378	0.0428	ID=COSM1163653,COSM1163652;OCCURENCE=2(pancreas)	.	.	.	.	.	.	.	0.0101	0.0101	0.0002	0.0046	0.0798	0.0434	0.0022	0.0133	0.0015	.	.	.
chr9	72225752	72225752	G	A	exonic	GDA	.	nonsynonymous SNV	GDA:NM_001242505:exon8:c.G790A:p.V264M	exonic	GDA	.	nonsynonymous SNV	GDA:ENST00000414671.1:exon6:c.G388A:p.V130M	exonic	GDA	.	nonsynonymous SNV	GDA:ENST00000376986.5:exon7:c.G556A:p.V186M	rs61752956	0.00778754	.	0.0144	0.0268	0.002	.	0.0141	0.0050	0.0188	.	.	.	.	.	.	D	D	0.0130	0.013	0.0024	0.0109	0	0.0070	0.0199	0.0210	0.0016	0	D	1.0
chr9	77020558	77020558	G	A	exonic	FOXB2	.	nonsynonymous SNV	FOXB2:NM_001013735:exon1:c.G904A:p.V302M,	exonic	FOXB2	.	nonsynonymous SNV	FOXB2:ENST00000376708.1:exon1:c.G904A:p.V302M,	exonic	FOXB2	.	nonsynonymous SNV	FOXB2:ENST00000376708.1:exon1:c.G904A:p.V302M,	rs200620036	0.00159744	.	.	.	.	0.0079	7.7e-05	.	0.0001	.	.	.	.	.	.	T	D	0.0013	0.0013	0	0	0.0150	0.0002	0.0003	0	0.0006	0.21	T	0.942
chr9	89388637	89388637	G	A	exonic	SEMA4D	.	nonsynonymous SNV	SEMA4D:NM_001371194:exon11:c.C1106T:p.A369V	exonic	SEMA4D	.	nonsynonymous SNV	SEMA4D:ENST00000339861.8:exon11:c.C1106T:p.A369V	exonic	SEMA4D	.	nonsynonymous SNV	SEMA4D:ENST00000339861.8:exon11:c.C1106T:p.A369V	rs761792824	.	.	.	.	.	.	.	.	.	.	.	.	.	.	.	D	T	5.96e-05	5.96e-05	0.0002	0.0003	0	0	1.553e-05	0	6.109e-05	0.01	D	0.999
chr9	92638088	92638088	G	A	exonic	IPPK	.	nonsynonymous SNV	IPPK:NM_022755:exon9:c.C829T:p.R277W,	exonic	ENST00000287996.7	.	nonsynonymous SNV	ENST00000287996.7:ENST00000287996.7:exon9:c.C829T:p.R277W,	exonic	IPPK	.	unknown	UNKNOWN,	rs2277168	0.0267572	0.0008	.	.	0.0041	0.128	0.0003	0.0009	.	.	.	.	.	.	.	D	T	0.0111	0.0111	0.0018	0.0002	0.1404	0	3.364e-05	0.0092	0.0029	0.01	D	0.984
chr9	92658681	92658681	G	A	exonic	IPPK	.	nonsynonymous SNV	IPPK:NM_022755:exon2:c.C82T:p.R28C,	exonic	ENST00000287996.7	.	nonsynonymous SNV	ENST00000287996.7:ENST00000287996.7:exon2:c.C82T:p.R28C,	exonic	IPPK	.	unknown	UNKNOWN,	rs775374177	.	.	.	.	.	.	.	.	.	.	.	.	.	.	.	T	T	8.243e-06	8.243e-06	0	0	0.0001	0	0	0	0	0.05	D	0.999
chr9	93111938	93111938	G	T	exonic	CARD19	.	stopgain	CARD19:NM_032310:exon4:c.G364T:p.G122X,	exonic	ENST00000375464.6	.	stopgain	ENST00000375464.6:ENST00000375464.6:exon4:c.G364T:p.G122X,	exonic	CARD19	.	unknown	UNKNOWN,	rs141857568	.	.	.	.	.	.	0.0003	.	0.0005	.	.	.	.	.	.	.	.	0.0002	0.0002	0	9.502e-05	0	0	0.0003	0	0	0.01	D	.
chr9	94567343	94567343	C	T	exonic	FBP2	.	nonsynonymous SNV	FBP2:NM_003837:exon5:c.G632A:p.S211N,	exonic	ENST00000375337.3	.	nonsynonymous SNV	ENST00000375337.3:ENST00000375337.3:exon5:c.G632A:p.S211N,	exonic	FBP2	.	unknown	UNKNOWN,	rs61755092	0.00219649	.	0.0029	0.006	0.0031	.	0.0049	0.0014	0.0067	.	.	.	.	.	.	D	T	0.0049	0.0049	0.0006	0.0032	0.0001	0.0017	0.0072	0.0099	0.0029	0	D	0.925
chr9	95005219	95005219	A	C	exonic	AOPEP	.	nonsynonymous SNV	AOPEP:NM_032823:exon10:c.A1742C:p.E581A	exonic	AOPEP	.	nonsynonymous SNV	AOPEP:ENST00000424143.5:exon9:c.A1211C:p.E404A	exonic	C9orf3	.	nonsynonymous SNV	C9orf3:ENST00000297979.9:exon10:c.A1742C:p.E581A	rs192735443	0.00439297	.	.	.	.	0.0218	.	.	.	.	.	.	.	.	.	T	T	0.0032	0.0032	0	0.0006	0.0329	0	0	0	0	0.3	T	0.75
chr9	97483254	97483254	G	A	exonic	TDRD7	.	nonsynonymous SNV	TDRD7:NM_001302884:exon14:c.G2596A:p.V866I	exonic	ENST00000355295.4	.	nonsynonymous SNV	ENST00000355295.4:ENST00000355295.4:exon15:c.G2818A:p.V940I,	exonic	TDRD7	.	unknown	UNKNOWN,	rs762032394	.	.	.	.	.	.	.	.	.	.	.	.	.	.	.	T	T	3.304e-05	3.304e-05	0	0	0	0	6.012e-05	0	0	0.19	T	0.911
chr9	101424972	101424972	G	C	exonic	ALDOB	.	nonsynonymous SNV	ALDOB:NM_000035:exon8:c.C870G:p.C290W,	exonic	ALDOB;ENST00000374855.8;ENST00000647789.1	.	nonsynonymous SNV	ALDOB:ENST00000649902.1:exon7:c.C870G:p.C290W	exonic	ALDOB	.	nonsynonymous SNV	ALDOB:ENST00000616752.1:exon8:c.C870G:p.C290W,	rs766799391	.	.	.	.	.	.	.	.	.	.	.	.	.	.	.	D	D	8.238e-06	8.238e-06	0	0	0	0	1.499e-05	0	0	0.02	D	0.555
chr9	105356288	105356288	A	G	exonic	SLC44A1	.	nonsynonymous SNV	SLC44A1:NM_001286730:exon6:c.A577G:p.T193A	exonic	ENST00000374720.7;SLC44A1	.	nonsynonymous SNV	ENST00000374720.7:ENST00000374720.7:exon6:c.A577G:p.T193A	exonic	SLC44A1	.	nonsynonymous SNV	SLC44A1:ENST00000374723.5:exon6:c.A577G:p.T193A	rs41306484	0.00419329	.	0.0014	0.0199	.	.	0.0110	0.0030	0.0151	.	.	.	.	.	.	T	T	0.0106	0.0106	0.0026	0.0073	0	0.0219	0.0153	0.0077	0.0005	0.75	T	0.622
chr9	114402892	114402892	G	T	exonic	WHRN	.	nonsynonymous SNV	WHRN:NM_001346890:exon8:c.C1533A:p.H511Q	exonic	ENST00000362057.3;WHRN	.	nonsynonymous SNV	WHRN:ENST00000374059.7:exon8:c.C1533A:p.H511Q	exonic	WHRN	.	nonsynonymous SNV	WHRN:ENST00000374059.7:exon8:c.C1533A:p.H511Q	rs117592152	0.0167732	0.0008	.	.	0.002	0.0804	0.0002	0.0005	0.0001	.	54841	Retinitis_pigmentosa-deafness_syndrome|not_specified|Nonsyndromic_Hearing_Loss,_Recessive|not_provided	MedGen:CN033130,OMIM:500004,SNOMED_CT:57838006|MedGen:CN169374|MedGen:CN239439|MedGen:CN517202	criteria_provided,_conflicting_interpretations	Conflicting_interpretations_of_pathogenicity	T	T	0.0062	0.0062	0.0007	9.544e-05	0.0813	0	3.228e-05	0.0050	0.0016	0.37	T	0.548
chr9	120539136	120539136	C	T	exonic	CDK5RAP2	.	nonsynonymous SNV	CDK5RAP2:NM_001011649:exon6:c.G412A:p.G138S	exonic	CDK5RAP2;ENST00000349780.8	.	nonsynonymous SNV	ENST00000349780.8:ENST00000349780.8:exon6:c.G412A:p.G138S	exonic	CDK5RAP2	.	nonsynonymous SNV	CDK5RAP2:ENST00000360190.8:exon6:c.G412A:p.G138S	rs61756286	0.000599042	.	0.0014	0.002	.	.	0.0013	0.0007	0.0016	.	370187	Primary_autosomal_recessive_microcephaly_3|not_specified|not_provided	MedGen:C1858108,OMIM:604804|MedGen:CN169374|MedGen:CN517202	criteria_provided,_conflicting_interpretations	Conflicting_interpretations_of_pathogenicity	T	T	0.0012	0.0012	0.0007	0.0010	0	0.0011	0.0015	0.0011	0.0014	0.4	T	0.825
chr9	121354630	121354630	C	T	exonic	STOM	.	nonsynonymous SNV	STOM:NM_001270526:exon3:c.G209A:p.R70H	exonic	ENST00000286713.6;STOM	.	nonsynonymous SNV	ENST00000286713.6:ENST00000286713.6:exon3:c.G209A:p.R70H	exonic	STOM	.	nonsynonymous SNV	STOM:ENST00000286713.6:exon3:c.G209A:p.R70H	rs115867734	0.00159744	0.0008	.	.	0.001	0.006	.	.	.	.	.	.	.	.	.	D	D	0.0004	0.0004	0	0	0.0036	0	1.511e-05	0	0.0008	0.07	T	1.0
chr9	127730702	127730702	C	T	exonic	TTC16	.	nonsynonymous SNV	TTC16:NM_001317037:exon14:c.C1880T:p.A627V	exonic	ENST00000373289.3	.	nonsynonymous SNV	ENST00000373289.3:ENST00000373289.3:exon14:c.C1919T:p.A640V,	exonic	TTC16	.	unknown	UNKNOWN,	rs200222599	0.000399361	.	.	.	.	0.002	.	.	.	.	.	.	.	.	.	T	T	0.0001	0.0001	0	0	0.0012	0	6.082e-05	0	6.061e-05	0.07	T	0.728
chr9	127925116	127925116	C	T	exonic	PIP5KL1	.	nonsynonymous SNV	PIP5KL1:NM_173492:exon4:c.G299A:p.R100H	exonic	ENST00000388747.8;PIP5KL1	.	nonsynonymous SNV	PIP5KL1:ENST00000300432.3:exon4:c.G299A:p.R100H	exonic	PIP5KL1	.	nonsynonymous SNV	PIP5KL1:ENST00000300432.3:exon4:c.G299A:p.R100H,	rs776871325	.	.	.	.	.	.	.	.	.	.	.	.	.	.	.	D	T	8.252e-06	8.252e-06	0	0	0	0	1.502e-05	0	0	0.42	T	0.998
chr9	127929781	127929781	C	G	exonic	PIP5KL1	.	nonsynonymous SNV	PIP5KL1:NM_001135219:exon2:c.G135C:p.E45D,	exonic	ENST00000388747.8	.	nonsynonymous SNV	ENST00000388747.8:ENST00000388747.8:exon2:c.G135C:p.E45D,	exonic	PIP5KL1	.	unknown	UNKNOWN,	rs200551826	.	.	.	.	.	.	0.0011	0.0003	0.0014	.	.	.	.	.	.	D	T	0.0010	0.001	0.0004	0	0	0	0.0019	0.0088	0	0.34	T	0.999
chr9	128836035	128836035	C	T	exonic	KYAT1	.	nonsynonymous SNV	KYAT1:NM_001122672:exon7:c.G577A:p.G193S	exonic	ENST00000302586.7;ENST00000436267.6;KYAT1	.	nonsynonymous SNV	KYAT1:ENST00000320665.10:exon7:c.G577A:p.G193S	exonic	KYAT1	.	nonsynonymous SNV	KYAT1:ENST00000320665.10:exon7:c.G577A:p.G193S,	rs765246267	.	.	.	.	.	.	.	.	.	.	.	.	.	.	.	D	D	5e-05	5e-05	0	0.0003	0	0	3.019e-05	0	0	0.45	T	1.0
chr9	130400890	130400890	A	G	exonic	HMCN2	.	nonsynonymous SNV	HMCN2:NM_001291815:exon77:c.A11713G:p.S3905G,	exonic	HMCN2	.	nonsynonymous SNV	HMCN2:ENST00000624552.3:exon77:c.A11653G:p.S3885G,	exonic	HMCN2	.	nonsynonymous SNV	HMCN2:ENST00000624552.3:exon77:c.A11653G:p.S3885G,	rs79793659	0.0125799	.	0.0043	.	.	0.0595	.	.	.	.	.	.	.	.	.	.	.	0.0049	0.0049	0	0	0.0354	0	0.0068	0.0062	0.0042	0.28	T	0.969
chr9	133352593	133352593	C	G	exonic	SURF1	.	nonsynonymous SNV	SURF1:NM_001280787:exon6:c.G277C:p.D93H	exonic	ENST00000371974.7;SURF1	.	nonsynonymous SNV	SURF1:ENST00000615505.4:exon6:c.G277C:p.D93H	exonic	SURF1	.	nonsynonymous SNV	SURF1:ENST00000615505.4:exon6:c.G277C:p.D93H,	rs72619327	0.0333466	.	0.0029	.	0.001	0.1627	0.0008	0.0020	0.0002	.	143078	Leigh_syndrome|not_specified|not_provided	MedGen:C0023264,OMIM:256000,Orphanet:ORPHA506,SNOMED_CT:29570005|MedGen:CN169374|MedGen:CN517202	criteria_provided,_conflicting_interpretations	Conflicting_interpretations_of_pathogenicity	D	D	0.0133	0.0133	0.0017	0.0182	0.1511	0.0008	0.0004	0.0078	0.0024	0.03	D	0.973
chr9	136791987	136791987	G	C	exonic	TMEM141	.	nonsynonymous SNV	TMEM141:NM_032928:exon3:c.G162C:p.R54S,	exonic	AL355987.3;ENST00000290079.8	.	nonsynonymous SNV	AL355987.3:ENST00000456614.2:exon2:c.G87C:p.R29S	exonic	RP11-216L13.17;TMEM141	.	nonsynonymous SNV	RP11-216L13.17:ENST00000456614.2:exon2:c.G87C:p.R29S,	rs116891320	0.00359425	0.0008	0.0058	0.0109	0.002	.	0.0115	0.0030	0.0159	.	.	.	.	.	.	T	.	0.0110	0.011	0.0021	0.0032	0	0.0133	0.0173	0.0100	0.0017	0.23	T	0.705
chr9	136858794	136858794	C	T	exonic	MAMDC4	.	nonsynonymous SNV	MAMDC4:NM_206920:exon23:c.C2897T:p.P966L,	exonic	ENST00000317446.6;MAMDC4	.	nonsynonymous SNV	ENST00000317446.6:ENST00000317446.6:exon23:c.C2897T:p.P966L	exonic	MAMDC4	.	nonsynonymous SNV	MAMDC4:ENST00000445819.5:exon25:c.C3134T:p.P1045L,	rs116894068	0.0091853	.	.	.	0.001	0.0446	0.0002	0.0007	.	.	.	.	.	.	.	D	T	0.0041	0.0041	0.0008	0.0003	0.0491	0.0003	9.824e-05	0.0024	0.0013	0.33	T	1.0
chr9	137069995	137069995	G	C	exonic	SAPCD2	.	nonsynonymous SNV	SAPCD2:NM_178448:exon1:c.C466G:p.R156G,	exonic	ENST00000409687.4	.	nonsynonymous SNV	ENST00000409687.4:ENST00000409687.4:exon1:c.C466G:p.R156G,	exonic	SAPCD2	.	unknown	UNKNOWN,	rs71483301	0.425519	0.497	0.3977	0.3211	0.3067	0.5704	.	.	.	ID=COSM4163611;OCCURENCE=1(thyroid)	.	.	.	.	.	T	T	0	0	.	.	.	.	.	.	.	0.28	T	0.993
chr9	137106742	137106742	G	A	exonic	MAN1B1	.	nonsynonymous SNV	MAN1B1:NM_016219:exon10:c.G1499A:p.R500Q,	exonic	ENST00000371589.8;MAN1B1	.	nonsynonymous SNV	ENST00000371589.8:ENST00000371589.8:exon10:c.G1499A:p.R500Q	exonic	MAN1B1	.	nonsynonymous SNV	MAN1B1:ENST00000535144.5:exon10:c.G1391A:p.R464Q,	rs149339002	0.00319489	.	0.0014	0.003	0.0031	0.0089	0.0003	.	0.0005	.	579585	History_of_neurodevelopmental_disorder|not_provided	MedGen:C2711754|MedGen:CN517202	criteria_provided,_multiple_submitters,_no_conflicts	Benign/Likely_benign	T	T	0.0030	0.003	9.688e-05	0.0005	0.0050	0.0241	0.0019	0.0022	0.0018	.	.	0.535
chr9	137225643	137225643	G	A	exonic	CYSRT1	.	nonsynonymous SNV	CYSRT1:NM_199001:exon2:c.G22A:p.V8I,	exonic	ENST00000409414.1	.	nonsynonymous SNV	ENST00000409414.1:ENST00000409414.1:exon2:c.G142A:p.V48I,	exonic	CYSRT1	.	unknown	UNKNOWN,	rs542585171	0.000399361	.	0.0014	0.001	.	.	.	.	.	ID=COSM216131;OCCURENCE=1(central_nervous_system)	.	.	.	.	.	D	.	0.0004	0.0004	0	0	0	0.0051	0	0.0045	0	0	D	0.998
chr9	137429297	137429297	C	T	exonic	NOXA1	.	nonsynonymous SNV	NOXA1:NM_001256067:exon5:c.C526T:p.R176W	exonic	NOXA1	.	nonsynonymous SNV	NOXA1:ENST00000341349.6:exon5:c.C526T:p.R176W,	exonic	NOXA1	.	nonsynonymous SNV	NOXA1:ENST00000341349.6:exon5:c.C526T:p.R176W,	rs201388549	0.00279553	.	.	.	.	0.0139	.	.	.	.	.	.	.	.	.	T	T	0.0040	0.004	0.0004	0	0.0427	0	0.0014	0	0.0001	0.18	T	1.0
[truncated: 19 more columns]
